# Supplementary material for: An extreme-phenotype genome‐wide association study identifies candidate cannabinoid pathway genes in Cannabis
Source: Springer Nature journal article supplement (doi:10.1038/s41598-020-75271-7), 2020-10-29
Supplement: MOESM2 [file 41598_2020_75271_MOESM2_ESM.pdf]

# **An Extreme-Phenotype Genome-Wide Association Study Identifies Candidate Cannabinoid Pathway Genes in *Cannabis***

**Matthew T. Welling<sup>1,2</sup>, Lei Liu<sup>1</sup>, Tobias Kretzschmar<sup>1</sup>, Ramil Mauleon<sup>1</sup>, Omid Ansari<sup>3,4</sup>, Graham J. King<sup>1,\*</sup>**

<sup>1</sup>Southern Cross Plant Science, Southern Cross University, Lismore, New South Wales 2480, Australia.

<sup>2</sup>La Trobe Institute for Agriculture and Food, School of Life Sciences, Department of Animal, Plant, and Soil Sciences, AgriBio, La Trobe University, Bundoora, VIC, 3086, Australia.

<sup>3</sup>Ecofibre Ltd, Brisbane, Queensland 4014, Australia.

<sup>4</sup>Ananda Hemp Ltd, Cynthiana, Kentucky 41031, USA.

\* Correspondence:

Graham J. King

graham.king@scu.edu.au

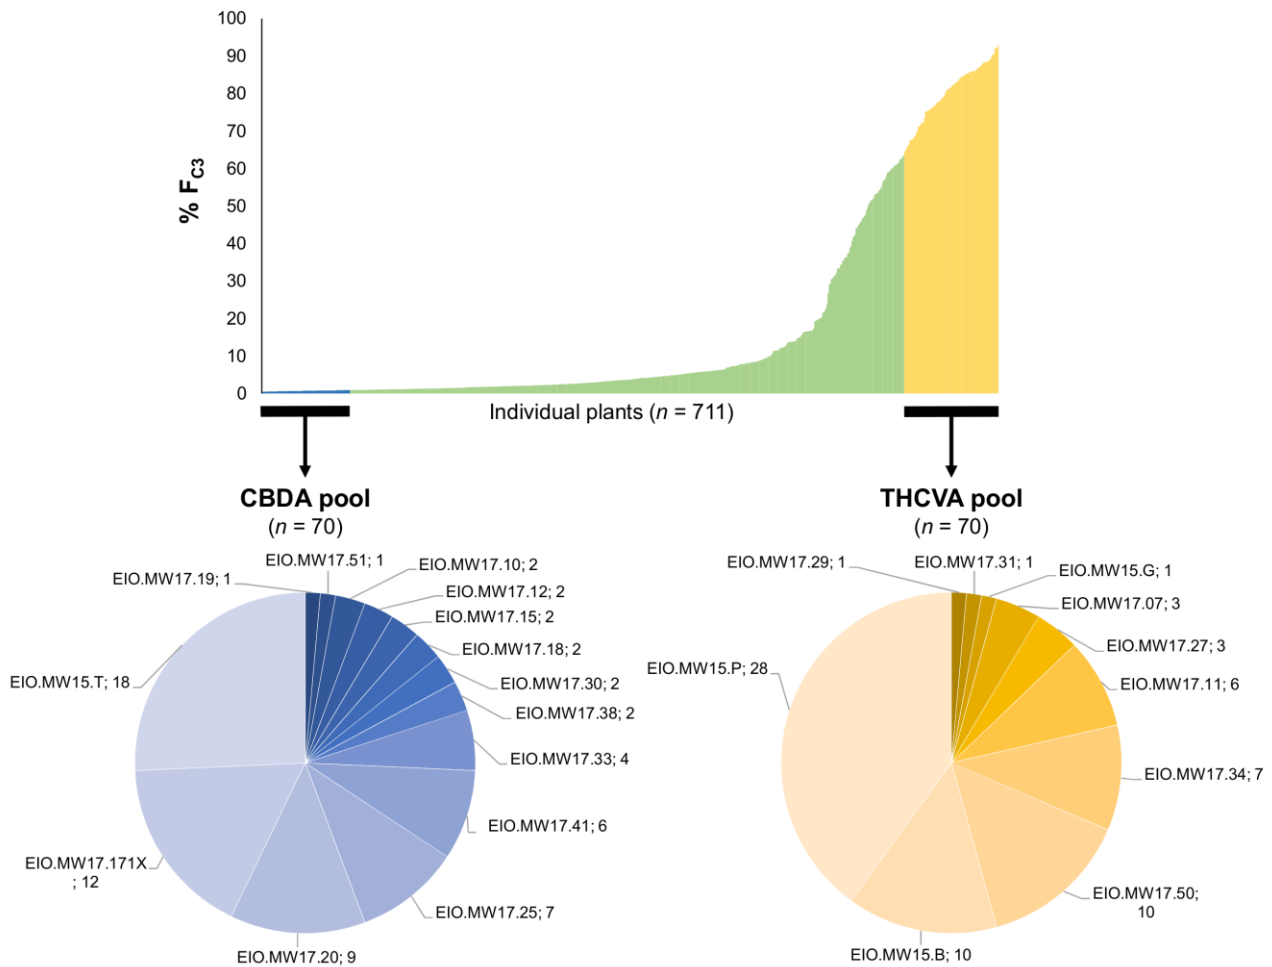

**Supplementary Figure S1. Selection intensity of bulked pools used for an extreme-phenotype genome-wide association study.** Alkyl cannabinoid values in 711 plants determined from liquid chromatography-mass spectrometry (LC-MS).  $C_3$ -alkyl cannabinoid fractions within the total cannabinoid fraction were calculated from fresh weight (w/w) cannabinoid content. Seventy individual plants per pool were used for an extreme-phenotype genome-wide association study, with a selectivity of 9.84 %. Individuals used in CBDA and THCVA chemotypically extreme pools were derived from 14 and 10 seed pack accessions, respectively. *Black bars* represent the range of  $C_3$ -alkyl cannabinoid values exhibited by plants used for bulk segregant analysis. *Pie charts* represent percentage of bulked plants per accession. *Number* after semicolon is the number of plants bulked per accession.

## Supplementary Tables

**Supplementary Table S2. Exon variant sites for *CBDAS*.**

| Chromosome | Position | Reference allele | Alternative allele | CBDA pool AFe | THCVA pool AFe | Delta-AFe |
|------------|----------|------------------|--------------------|---------------|----------------|-----------|
| CM011610.1 | 21837002 | C                | T                  | 0.0           | 1.0            | 1.0       |
| CM011610.1 | 21837018 | T                | A                  | 0.0           | 1.0            | 1.0       |
| CM011610.1 | 21837092 | T                | C                  | 0.0           | 1.0            | 1.0       |
| CM011610.1 | 21837115 | C                | A                  | 0.0           | 1.0            | 1.0       |
| CM011610.1 | 21837168 | A                | C                  | 0.0           | 1.0            | 1.0       |
| CM011610.1 | 21837169 | T                | C                  | 0.0           | 1.0            | 1.0       |
| CM011610.1 | 21837174 | C                | T                  | 0.0           | 1.0            | 1.0       |
| CM011610.1 | 21837189 | TCGTA            | T                  | 0.0           | 1.0            | 1.0       |
| CM011610.1 | 21837210 | C                | A                  | 0.0           | 1.0            | 1.0       |
| CM011610.1 | 21837355 | G                | A                  | 0.0           | 1.0            | 1.0       |
| CM011610.1 | 21837370 | T                | C                  | 0.0           | 1.0            | 1.0       |
| CM011610.1 | 21837388 | G                | A                  | 0.0           | 0.9            | 0.9       |
| CM011610.1 | 21837444 | G                | A                  | 0.0           | 1.0            | 1.0       |
| CM011610.1 | 21837582 | G                | C                  | 0.0           | 1.0            | 1.0       |
| CM011610.1 | 21837625 | C                | T                  | 0.0           | 1.0            | 1.0       |
| CM011610.1 | 21837650 | A                | G                  | 0.0           | 1.0            | 1.0       |
| CM011610.1 | 21837674 | C                | G                  | 0.0           | 1.0            | 1.0       |
| CM011610.1 | 21837725 | T                | A                  | 0.0           | 1.0            | 1.0       |
| CM011610.1 | 21837741 | C                | G                  | 0.0           | 1.0            | 1.0       |
| CM011610.1 | 21837791 | C                | CCAA               | 0.0           | 1.0            | 1.0       |
| CM011610.1 | 21837925 | C                | T                  | 0.0           | 1.0            | 1.0       |
| CM011610.1 | 21837956 | G                | A                  | 0.0           | 1.0            | 1.0       |
| CM011610.1 | 21838039 | G                | T                  | 0.0           | 0.9            | 0.9       |
| CM011610.1 | 21838054 | G                | A                  | 0.0           | 1.0            | 1.0       |
| CM011610.1 | 21838062 | G                | A                  | 0.0           | 1.0            | 1.0       |
| CM011610.1 | 21838099 | T                | C                  | 0.0           | 1.0            | 1.0       |
| CM011610.1 | 21838116 | A                | G                  | 0.0           | 1.0            | 1.0       |
| CM011610.1 | 21838132 | C                | T                  | 0.0           | 1.0            | 1.0       |
| CM011610.1 | 21838156 | C                | A                  | 0.0           | 1.0            | 1.0       |
| CM011610.1 | 21838221 | T                | C                  | 0.0           | 0.9            | 0.9       |
| CM011610.1 | 21838229 | C                | A                  | 0.0           | 1.0            | 1.0       |
| CM011610.1 | 21838260 | T                | A                  | 0.0           | 1.0            | 1.0       |
| CM011610.1 | 21838352 | T                | A                  | 0.0           | 1.0            | 1.0       |
| CM011610.1 | 21838360 | G                | A                  | 0.0           | 1.0            | 1.0       |
| CM011610.1 | 21838390 | A                | C                  | 0.0           | 1.0            | 1.0       |
| CM011610.1 | 21838399 | C                | A                  | 0.0           | 0.9            | 0.9       |
| CM011610.1 | 21838421 | A                | C                  | 0.0           | 1.0            | 1.0       |
| CM011610.1 | 21838427 | A                | G                  | 0.0           | 1.0            | 1.0       |
| CM011610.1 | 21838472 | G                | A                  | 0.0           | 1.0            | 1.0       |
| CM011610.1 | 21838490 | G                | C                  | 0.0           | 1.0            | 1.0       |
| CM011610.1 | 21838521 | A                | G                  | 0.0           | 1.0            | 1.0       |
| CM011610.1 | 21838524 | C                | A                  | 0.0           | 1.0            | 1.0       |
| CM011610.1 | 21838544 | C                | T                  | 0.0           | 1.0            | 1.0       |

AFe: is the relative number of reads supportive of either the alternative allele or the reference allele. AFe of 0.0 indicates 100 % of reads support the reference allele. AFe of 1.0 indicates 100 % of reads support the alternative allele. AFe: allele frequency estimates; *CBDAS*: gene encoding cannabidiolic acid synthase; delta-AFe: absolute difference between AFe of CBDA and THCVA bulk pools.

**Supplementary Table S3. Candidate genes identified from CBDA and THCVA pools using the FN reference sequence.**

| Interval (locus) | Length (bp) | Chr.       | Start coordinate | Stop coordinate | Gene length (bp) | Predicted protein <sup>1</sup>                              | GenBank accession | Cover (%) | E-value | Identity (%) | Relevance t <sup>2</sup> |
|------------------|-------------|------------|------------------|-----------------|------------------|-------------------------------------------------------------|-------------------|-----------|---------|--------------|--------------------------|
| Cs_FN_Ch01_101   | 1,714       | CM011605.1 | 53,067,046       | 53,068,760      | 552              | Photosystem I PsaK, reaction centre                         | PON71667.1        | 34        | 7.9     | 30.30        | *                        |
| Cs_FN_Ch02_102   | 6,276       | CM011606.1 | 15,615,434       | 15,621,710      | 264              | Uncharacterized protein LOC107061829                        | XP_015167212.1    | 50        | 5.9     | 36.36        | *                        |
|                  |             |            |                  |                 | 123              | Dicer-like protein 4                                        | XP_024928613.1    | 87        | 2e-14   | 94.29        | *                        |
| Cs_FN_Ch02_103   | 1,007       | CM011606.1 | 90,575,894       | 90,576,901      | 228              | Retrovirus-related pol polyprotein from transposon RE1      | RVW20207.1        | 60        | 1e-17   | 77.78        | *                        |
| Cs_FN_Ch03_104   | 4,409       | CM011607.1 | 36,220,499       | 36,224,908      | 2118             | Retrovirus-related pol polyprotein from transposon TNT 1-94 | RVX12712.1        | 93        | 0.0     | 50.65        | *                        |
| Cs_FN_Ch03_105   | 22,595      | CM011607.1 | 36,247,017       | 36,269,612      | 5304             | Protein NYNRIN-like                                         | XP_013650953.1    | 61        | 0.0     | 42.80        | *                        |
|                  |             |            |                  |                 | 891              | B3 domain-containing protein Os01g0234100-like              | XP_021751876.1    | 40        | 0.47    | 28.35        | *                        |
|                  |             |            |                  |                 | 948              | Peptide methionine sulfoxide reductase                      | PON80230.1        | 43        | 9e-09   | 31.69        | *                        |
|                  |             |            |                  |                 | 195              | Thylakoid ADP, ATP carrier protein, chloroplastic-like      | XP_020218712.1    | 62        | 1.2     | 42.50        | *                        |
|                  |             |            |                  |                 | 363              | Uncharacterized protein LOC111986372                        | XP_023873765.1    | 81        | 2e-10   | 38.32        | *                        |
| Cs_FN_Ch03_106   | 12,343      | CM011607.1 | 46,169,567       | 46,181,910      | 150              | Hypothetical protein TorRG33x02_210200                      | PON83186.1        | 42        | 0.44    | 71.43        | *                        |
|                  |             |            |                  |                 | 303              | Zinc finger, FYVE-type                                      | OMO93156.1        | 77        | 3.1     | 30.00        | *                        |
|                  |             |            |                  |                 | 810              | Transposon Ty3-I Gag-Pol polyprotein                        | RVW58909.1        | 96        | 5e-137  | 71.54        | *                        |
| Cs_FN_Ch04_107   | 1,143       | CM011608.1 | 11,031,676       | 11,032,819      | N/A              | No gene predicted for interval                              | N/A               | N/A       | N/A     | N/A          | N/A                      |
| Cs_FN_Ch05_108   | 1,547       | CM011609.1 | 14,946,580       | 14,948,127      | N/A              | No gene predicted for interval                              | N/A               | N/A       | N/A     | N/A          | N/A                      |
| Cs_FN_Ch05_109   | 1,547       | CM011609.1 | 14,946,580       | 14,948,127      | N/A              | No gene predicted for interval                              | N/A               | N/A       | N/A     | N/A          | N/A                      |
| Cs_FN_Ch05_110   | 7,533       | CM011609.1 | 76,119,680       | 76,127,213      | 633              | 40S ribosomal protein Sa-1                                  | ONL94284.1        | 21        | 7e-19   | 91.30        | *                        |
|                  |             |            |                  |                 | 519              | Putative viral resistance protein                           | BAD53862.1        | 35        | 0.96    | 35.94        | *                        |
| Cs_FN_Ch06_111   | 6,924       | CM011610.1 | 21,831,999       | 21,838,923      | 1791             | Cannabidiolic acid synthase                                 | AJB28530.1        | 87        | 0.0     | 98.66        | ***                      |
| Cs_FN_Ch06_112   | 57,056      | CM011610.1 | 21,980,060       | 22,037,116      | 612              | Retrovirus-related pol polyprotein from transposon TNT 1-94 | RVW52634.1        | 83        | 2e-70   | 70.59        | *                        |
|                  |             |            |                  |                 | 318              | Hypothetical protein Saspl_048356                           | TEY18652.1        | 41        | 3.6     | 46.81        | *                        |
|                  |             |            |                  |                 | 522              | Splicing factor suppressor of ABI3-5                        | PNX97210.1        | 41        | 8.7     | 33.33        | *                        |
|                  |             |            |                  |                 | 348              | Pol polyprotein                                             | RDX76937.1        | 61        | 2e-18   | 49.30        | *                        |
|                  |             |            |                  |                 | 3303             | Uncharacterized protein LOC104901504                        | XP_010687394.1    | 58        | 2e-116  | 31.59        | *                        |
| Cs_FN_Ch07_113   | 2,870       | CM011611.1 | 75,606,412       | 75,609,282      | 156              | Poly(ADP-ribose) polymerase                                 | PON43801.1        | 98        | 4e-20   | 86.00        | *                        |
| Cs_FN_Ch10_114   | 1,184       | CM011614.1 | 33,220,348       | 33,221,532      | 324              | DJ-1 superfamily protein                                    | PON82055.1        | 100       | 4e-63   | 88.89        | *                        |

**Supplementary Table S3. Candidate genes identified from CBDA and THCVA pools using the FN reference sequence (*cont.*).**

| Interval (locus) | Length (bp) | Chr.            | Start coordinate | Stop coordinate | Gene length (bp) | Predicted protein <sup>1</sup>                              | GenBank accession | Cover (%) | E-value | Identity (%) | Relevance <sup>2</sup> |
|------------------|-------------|-----------------|------------------|-----------------|------------------|-------------------------------------------------------------|-------------------|-----------|---------|--------------|------------------------|
| Cs_FN_SS00_115   | 36,516      | Super_Scaffold0 | 8,512,398        | 8,548,914       | 2049             | Retrovirus-related pol polyprotein from transposon 17.6     | RVW67055.1        | 66        | 0.0     | 62.45        | *                      |
|                  |             |                 |                  |                 | 1293             | Transposon Ty3-I Gag-Pol polyprotein                        | RVW79670.1        | 95        | 2e-146  | 47.73        | *                      |
|                  |             |                 |                  |                 | 432              | Hypothetical protein PAHAL_3G132000                         | PVH61823.1        | 27        | 3.8     | 37.50        | *                      |
|                  |             |                 |                  |                 | 2934             | Hypothetical protein AMTR_s05719p00002740                   | ERM97918.1        | 31        | 5e-153  | 89.21        | *                      |
|                  |             |                 |                  |                 | 1449             | Protein FAR1-RELATED SEQUENCE 4                             | XP_006847242.1    | 95        | 0.0     | 99.56        | **                     |
|                  |             |                 |                  |                 | 747              | Zinc finger, CCHC-type                                      | POO00252.1        | 50        | 8e-18   | 32.26        | **                     |
|                  |             |                 |                  |                 | 159              | Cytochrome P450 87A3                                        | XP_021863246.1    | 38        | 1.6     | 50.00        | *                      |
| Cs_FN_SS00_116   | 22,630      | Super_Scaffold0 | 8,575,175        | 8,597,805       | 456              | Retrovirus-related Gag/Pol protein                          | ADJ18449.1        | 36        | 2e-07   | 47.27        | *                      |
|                  |             |                 |                  |                 | 1110             | Retrovirus-related pol polyprotein from transposon TNT 1-94 | RVW52633.1        | 100       | 1e-156  | 54.06        | *                      |
|                  |             |                 |                  |                 | 399              | Putative RNA-directed DNA polymerase                        | PRQ55763.1        | 49        | 3e-14   | 49.23        | *                      |
|                  |             |                 |                  |                 | 840              | Putative ribonuclease H protein                             | RVX04314.1        | 85        | 3e-28   | 32.64        | *                      |
|                  |             |                 |                  |                 | 789              | LRR receptor-like kinase family protein                     | KEH19857.1        | 14        | 0.030   | 57.89        | *                      |
|                  |             |                 |                  |                 | 192              | Uncharacterized protein LOC109158404                        | XP_019161859.1    | 53        | 9.4     | 35.29        | *                      |
|                  |             |                 |                  |                 | 3042             | Transposon Ty3-G Gag-Pol polyprotein                        | RVW68203.1        | 77        | 0.0     | 51.30        | *                      |
|                  |             |                 |                  |                 | 1218             | Peptide methionine sulfoxide reductase                      | PON80230.1        | 30        | 1e-17   | 35.77        | *                      |
|                  |             |                 |                  |                 | 720              | MND1-interacting protein 1                                  | XP_015612542.1    | 34        | 4.9     | 34.15        | *                      |
| Cs_FN_SS00_117   | 1,287       | Super_Scaffold0 | 8,641,444        | 8,642,731       | 1050             | Probable serine/threonine-protein kinase fhkB isoform X2    | XP_021985327.1    | 18        | 9.5     | 26.80        | *                      |
| Cs_FN_SS00_118   | 2,849       | Super_Scaffold0 | 8,692,374        | 8,695,223       | 810              | Hypothetical protein AMTR_s01250p00009040                   | ERM98296.1        | 27        | 3e-10   | 53.09        | *                      |
| Cs_FN_SS00_119   | 11,833      | Super_Scaffold0 | 9,039,053        | 9,050,886       | 3339             | Transposon Ty3-I Gag-Pol polyprotein                        | RVW67492.1        | 89        | 0.0     | 50.45        | *                      |
| Cs_FN_SS00_120   | 4,461       | Super_Scaffold0 | 9,052,611        | 9,057,072       | 1050             | Transposon Tf2-2 polyprotein                                | RVW68715.1        | 91        | 3e-123  | 45.04        | *                      |
|                  |             |                 |                  |                 | 291              | Wall-associated receptor kinase-like 4                      | XP_023645700.1    | 58        | 2.6     | 29.03        | *                      |
| Cs_FN_SS00_121   | 2,062       | Super_Scaffold0 | 39,955,730       | 39,957,792      | 150              | Uncharacterized protein LOC104714925                        | XP_010430691.1    | 97        | 6.1     | 97%          | *                      |
| Cs_FN_SS00_122   | 2,817       | Super_Scaffold0 | 147,482,669      | 147,485,486     | 243              | Sugar transport protein 5-like isoform X1                   | XP_015692118.1    | 97        | 8.4     | 29.63        | *                      |

<sup>1</sup>Protein prediction based on alignment with non-redundant sequences using the National Center for Biotechnology Information (NCBI) Basic Local Alignment Search Tool (BLAST)p algorithm. Protein selection based on highest scoring characterised protein, then identity, then coverage, then *E* value. <sup>2</sup>Relevance to chemotype: \*: unclear; \*\*: possible; \*\*\*: likely

**Supplementary Table S4. Candidate genes identified from CBDA and THCVA DNA pools using the PK reference sequence.**

| Locus (interval) | Length (bp) | Chr.       | Start coordinate | Stop coordinate | Gene length (bp) | Predicted protein                                                             | GenBank accession | Cover (%) | E-value | Identity (%) | Relevance |
|------------------|-------------|------------|------------------|-----------------|------------------|-------------------------------------------------------------------------------|-------------------|-----------|---------|--------------|-----------|
| Cs_PK_Ch02_101   | 27,447      | CM010792.1 | 34,376,781       | 34,404,228      | 711              | Hypothetical protein PHAVU_009G169400g                                        | XP_007137962.1    | 30        | 9.8     | 32.00        | *         |
|                  |             |            |                  |                 | 465              | Reverse transcriptase                                                         | OMO58663.1        | 46        | 9.7     | 35.14        | *         |
|                  |             |            |                  |                 | 411              | Uncharacterized protein LOC8280609                                            | XP_015573636.1    | 29        | 6.4     | 35.00        | *         |
|                  |             |            |                  |                 | 558              | Transposon Tf2-8 polyprotein                                                  | RVW92564.1        | 44        | 4e-25   | 51.76        | *         |
|                  |             |            |                  |                 | 1185             | Zf-CCHC domain-containing protein/UBN2 domain-containing protein              | GAV67439.1        | 99        | 2e-76   | 39.34        | *         |
|                  |             |            |                  |                 | 273              | WAT1-related protein At5g64700-like                                           | XP_027074243.1    | 41        | 1.2     | 41.86        | *         |
| Cs_PK_Ch02_102   | 43,208      | CM010792.1 | 60,414,035       | 60,457,243      | 1686             | Transposase                                                                   | BAV56702.1        | 34        | 1e-38   | 41.33        | *         |
|                  |             |            |                  |                 | 369              | Hypothetical protein PAHAL_3G132000                                           | PVH61823.1        | 31        | 5.6     | 36.84        | *         |
|                  |             |            |                  |                 | 1074             | Ribonuclease H-like domain containing protein                                 | PON53148.1        | 49        | 3e-97   | 79.10        | *         |
|                  |             |            |                  |                 | 708              | Ribonuclease H-like domain containing protein                                 | PON53148.1        | 84        | 1e-72   | 55.14        | *         |
|                  |             |            |                  |                 | 798              | Ulp1 protease family, C-terminal catalytic domain containing protein          | PON68164.1        | 35        | 0.027   | 29.17        | *         |
|                  |             |            |                  |                 | 150              | 40S ribosomal protein Sa-2                                                    | XP_002303327.2    | 55        | 7e-09   | 92.59        | *         |
|                  |             |            |                  |                 | 3432             | Beta-porphyrinase                                                             | PSR88450.1        | 43        | 2e-63   | 31.14        | *         |
|                  |             |            |                  |                 | 459              | Ribonuclease H-like domain containing protein                                 | PON92320.1        | 38        | 3e-15   | 60.34        | *         |
|                  |             |            |                  |                 | 1512             | Peptide methionine sulfoxide reductase                                        | PON80230.1        | 38        | 3e-27   | 34.17        | *         |
| Cs_PK_Ch03_103   | 1,183       | CM010793.1 | 73,374,622       | 73,375,805      | 414              | Pleiotropic drug resistance protein 2-like isoform X3 [ <i>Prunus avium</i> ] | XP_021818809.1    | 89        | 3e-58   | 76.42        | *         |
| Cs_PK_Ch06_104   | 3772        | CM010796.1 | 59,095,674       | 59,099,446      | N/A              | No gene predicted for interval                                                | N/A               | N/A       | N/A     | N/A          | N/A       |
| Cs_PK_Ch07_105   | 1,510       | CM010797.1 | 1,666,404        | 1,667,914       | N/A              | No gene predicted for interval                                                | N/A               | N/A       | N/A     | N/A          | N/A       |
| Cs_PK_Ch09_106   | 2,835       | CM010799.1 | 49,163,072       | 49,165,907      | 915              | Beta-ketoacyl-ACP reductase                                                   | XP_003538564.1    | 100       | 4e-136  | 67.74        | ***       |
| Cs_PK_Ch09_107   | 12,046      | CM010799.1 | 49,166,568       | 49,178,614      | 201              | FkbH domain-containing protein                                                | PON89298.1        | 80        | 9e-19   | 77.36        | ***       |
| Cs_PK_Ch09_108   | 12,365      | CM010799.1 | 49,179,279       | 49,191,644      | 549              | TRAM/LAG1/CLN8 domain-containing protein (TLC domain)                         | PON82787.1        | 99        | 9e-101  | 81.77        | ***       |
|                  |             |            |                  |                 | 1575             | DNA polymerase alpha, subunit B                                               | PON82786.1        | 94        | 0.0     | 88.00        | *         |
| Cs_PK_Ch09_109   | 1,340       | CM010799.1 | 49,190,198       | 49,191,538      | 369              | DNA polymerase alpha subunit B                                                | XP_012085629.1    | 100       | 5e-35   | 56.91        | *         |

<sup>1</sup>Protein prediction based on alignment with non-redundant sequences using the National Center for Biotechnology Information (NCBI) Basic Local Alignment Search Tool (BLAST)p tool. Protein selection based on highest scoring characterised protein, then identity, then coverage, then *E* value. <sup>2</sup>Relevance to chemotype: \*: unclear; \*\*: possible; \*\*\*: likely

**Supplementary Table S5. BKR short variants putatively linked to alkyl cannabinoid composition.**

| Locus ID  | Ref allele | Alt allele | Region | Amino acid change | Position on Chr. 9 | CBDA pool AFe | CBDA pool DP | THCVA pool AFe | THCVA pool DP | Delta-AFe |
|-----------|------------|------------|--------|-------------------|--------------------|---------------|--------------|----------------|---------------|-----------|
| Cs_BKR_02 | A          | G          | Intron | N/A               | 49162146           | 0.1           | 62           | 1.0            | 45            | 0.9       |
| Cs_BKR_02 | A          | C          | Intron | N/A               | 49162180           | 0.0           | 62           | 1.0            | 41            | 1.0       |
| Cs_BKR_03 | A          | G          | Intron | N/A               | 49162335           | 0.0           | 66           | 1.0            | 40            | 1.0       |
| Cs_BKR_04 | T          | G          | Intron | N/A               | 49162379           | 0.1           | 71           | 1.0            | 41            | 0.9       |
| Cs_BKR_05 | A          | G          | Intron | N/A               | 49162529           | 0.0           | 53           | 1.0            | 59            | 1.0       |
| Cs_BKR_06 | G          | A          | Exon   | Ala to Val        | 49162975           | 0.1           | 62           | 1.0            | 65            | 0.9       |
| Cs_BKR_07 | T          | C          | Exon   | Ser to Asn        | 49163005           | 0.1           | 61           | 1.0            | 64            | 0.9       |
| Cs_BKR_08 | A          | G          | Intron | N/A               | 49163072           | 0.0           | 52           | 0.9            | 62            | 0.9       |
| Cs_BKR_09 | A          | G          | Intron | N/A               | 49163190           | 0.0           | 57           | 1.0            | 47            | 1.0       |
| Cs_BKR_10 | A          | G          | Intron | N/A               | 49163323           | 0.0           | 76           | 1.0            | 53            | 1.0       |
| Cs_BKR_11 | AT         | A          | Intron | N/A               | 49163486           | 0.0           | 77           | 1.0            | 42            | 1.0       |
| Cs_BKR_12 | T          | C          | Intron | N/A               | 49163595           | 0.1           | 66           | 1.0            | 56            | 0.9       |
| Cs_BKR_13 | G          | T          | Intron | N/A               | 49163650           | 0.0           | 71           | 1.0            | 64            | 1.0       |
| Cs_BKR_14 | T          | C          | Intron | N/A               | 49163849           | 0.0           | 68           | 0.9            | 47            | 0.9       |
| Cs_BKR_15 | T          | C          | Intron | N/A               | 49163850           | 0.0           | 67           | 0.9            | 47            | 0.9       |
| Cs_BKR_16 | A          | G          | Intron | N/A               | 49163871           | 0.0           | 66           | 1.0            | 41            | 1.0       |
| Cs_BKR_17 | A          | AC         | Intron | N/A               | 49165872           | 0.0           | 79           | 1.0            | 91            | 1.0       |
| Cs_BKR_18 | C          | T          | Exon   | N/A               | 49165925           | 0.1           | 77           | 1.0            | 97            | 0.9       |
| Cs_BKR_19 | G          | A          | Exon   | N/A               | 49165943           | 0.1           | 76           | 1.0            | 105           | 0.9       |
| Cs_BKR_20 | ATTG       | A          | 5' UTR | N/A               | 49166087           | 0.0           | 72           | 1.0            | 155           | 1.0       |
| Cs_BKR_21 | C          | A          | 5' UTR | N/A               | 49166135           | 0.0           | 63           | 0.9            | 177           | 0.9       |
| Cs_BKR_22 | A          | C          | 5' UTR | N/A               | 49166141           | 0.0           | 63           | 0.9            | 181           | 0.9       |

AFe: is the relative number of reads supportive of either the alternative allele or the reference allele. AFe of 0.0 indicates 100 % of reads support the reference allele. AFe Of 1.0 indicates 100 % of reads support the alternative allele. AFe: allele frequency estimates; delta-AFe: absolute difference between AFe of CBDA and THCVA pools; DP: depth of coverage; Chr 9: GenBank Acc. CM010799.1.

**Supplementary Table S6. Alignment of putative alkyl cannabinoid candidate genes with the PK draft transcriptome.**

| Putative gene homolog | Query length | Target mRNA sequence | Query Start | Query Finish | Query Cover (%) | Query Identity (%) | <i>E</i> -value |
|-----------------------|--------------|----------------------|-------------|--------------|-----------------|--------------------|-----------------|
| <i>BKR</i>            | 915          | PK02233.1            | 422         | 908          | 53              | 100                | 8.9e-281        |
|                       |              | PK02233.1            | 168         | 351          | 20              | 100                | 5.8e-100        |
|                       |              | PK02233.1            | 1           | 169          | 18              | 99                 | 7.8e-087        |
|                       |              | PK03757.1            | 250         | 297          | 5               | 100                | 4.7e-019        |
|                       |              | PK03757.1            | 296         | 343          | 5               | 100                | 4.7e-019        |
| <i>fkbH</i>           | 201          | PK03827.1            | 275         | 347          | 7               | 90                 | 2.9e-017        |
|                       |              | PK27448.1            | 10          | 181          | 85              | 100                | 1.7e-093        |
| <i>TLC</i>            | 549          | PK21994.1            | 23          | 181          | 74              | 92                 | 6.3e-058        |
|                       |              | PK20880.1            | 1           | 549          | 100             | 100                | 0.000000        |

Alignment of mRNA sequences with the canStat3 Purple Kush draft transcriptome was performed using the TimeLogic® Tera-BlastN™ algorithm (Active Motif Inc.). *E*-value cut-off limit 1e-10. The canSat3\_transcriptome-representative.fa file was downloaded from the *Cannabis* Genome Browser (date accessed 12/04/2019): <http://genome.ccb.utoronto.ca/downloads.html>
