# Supplementary material for: An extreme-phenotype genome‐wide association study identifies candidate cannabinoid pathway genes in Cannabis
Source: Sci Rep. 2020 Oct 29;10:18643. doi: 10.1038/s41598-020-75271-7 (PMC7596533; doi:10.1038/s41598-020-75271-7)
Supplement: Supplementary file 1 — Supplementary Information 1. [file 41598_2020_75271_MOESM1_ESM.xlsx]

## Sheet: SupplementaryTableS1
Sample ID			Cannabinoid FW (% w/w)												Est. acid cannabinoid FW (% w/w)						Qualitative fractions (% total)
Accession	Plant	Rep	CBDV	CBD	THC	CBC	CBDA	THCV	CBN	CBDVA	CBGA	CBG	THCVA	THCA	THCA	THCVA	CBDA	CBDVA	CBGA	Total	THCA	THCVA	CBDA	CBDVA	CBGA	C3 alkyl	C5 alkyl	Dicyclic	Tricyclic
EIO.MW17.29	01	A	0.000213694	0	0	0	4.86332e-05	0.000253428	0	0.000334888	0	0	0.0482457	0.00854155	0.00854155	0.048538	4.86332e-05	0.000581409	0	0.0577096	14.8009	84.1073	0.0842722	1.00747	0	85.1148	14.8852	1.09175	98.9083
EIO.MW17.29	01	B	0.000114474	0	0	0	4.86638e-05	0.000233409	0	0.000254351	0	0	0.0371187	0.00655457	0.00655457	0.0373879	4.86638e-05	0.00038641	0	0.0443776	14.77	84.2496	0.109659	0.870734	0	85.1203	14.8797	0.980392	99.0196
EIO.MW17.29	02	A	0	0	0.000206246	0.000100092	0.000191617	0	0	0	7.26682e-05	0.000286979	0.00195952	0.0429864	0.0432215	0.00195952	0.000191617	0	0.000399555	0.0453726	95.259	4.31873	0.422319	0	0.872922	4.31873	95.6813	0.422319	99.5777
EIO.MW17.29	02	B	0	0	0.000205397	0.000104635	0.00015811	0	0	0	7.01281e-05	0.000271281	0.00195417	0.0402494	0.0404835	0.00195417	0.00015811	0	0.000379134	0.0425958	95.0411	4.58771	0.371186	0	0.882221	4.58771	95.4123	0.371186	99.6288
EIO.MW17.29	03	A	0	0	0.000171508	0.000138294	0.000133541	0	0	8.3074e-05	4.81854e-05	0.00114493	0.00748298	0.0299867	0.0301822	0.00748298	0.000133541	8.3074e-05	0.00135233	0.0378818	79.6747	19.7535	0.352521	0.219298	3.44682	19.9728	80.0272	0.571818	99.4282
EIO.MW17.29	03	B	0	0	0.000218006	0.000311385	0.000114025	0	0	7.54657e-05	0.000111249	0.000997301	0.00625006	0.0246876	0.0249361	0.00625006	0.000114025	7.54657e-05	0.00124724	0.0313756	79.4759	19.9201	0.363419	0.240524	3.8232	20.1606	79.8394	0.603942	99.3961
EIO.MW17.29	04	A	0	0	0.000239079	0.00034051	0.000164259	0	0	5.93884e-05	3.97174e-05	0.000536105	0.00271748	0.0421739	0.0424464	0.00271748	0.000164259	5.93884e-05	0.000650373	0.0453875	93.52	5.98728	0.361902	0.130847	1.41269	6.11813	93.8819	0.49275	99.5073
EIO.MW17.29	04	B	0	0	0.000241546	0.000322921	0.000157761	0	0	4.73322e-05	2.52872e-05	0.000421144	0.00247361	0.0381238	0.0383992	0.00247361	0.000157761	4.73322e-05	0.000504995	0.0410779	93.479	6.02176	0.384053	0.115225	1.21443	6.13699	93.863	0.499278	99.5007
EIO.MW17.29	05	A	0	0	0.000286528	0.000219807	0.000244519	0	0	0	0.000201601	0.0006524	0.000963708	0.0615321	0.0618587	0.000963708	0.000244519	0	0.000944724	0.0630669	98.0842	1.52807	0.387713	0	1.47586	1.52807	98.4719	0.387713	99.6123
EIO.MW17.29	05	B	0	0	0.000226946	0.000141523	0.000211356	0	0	0	0.000118057	0.000525973	0.000684981	0.0490394	0.0492981	0.000684981	0.000211356	0	0.000717172	0.0501945	98.2143	1.36465	0.421073	0	1.40866	1.36465	98.6353	0.421073	99.5789
EIO.MW17.29	06	A	0	0	0.000177147	7.18762e-05	0.000171373	0	0	3.46223e-05	5.33285e-05	0.00023867	0.000737608	0.0402777	0.0404796	0.000737608	0.000171373	3.46223e-05	0.000325188	0.0414232	97.722	1.78066	0.413713	0.0835819	0.778923	1.86425	98.1358	0.497294	99.5027
EIO.MW17.29	06	B	0	0	0.000217921	7.38382e-05	0.000206274	0	0	3.087e-05	5.01252e-05	0.000284672	0.000871107	0.0527646	0.053013	0.000871107	0.000206274	3.087e-05	0.000374384	0.0541213	97.9523	1.60955	0.381132	0.0570385	0.686998	1.66658	98.3334	0.438171	99.5618
EIO.MW17.29	07	A	0	0	0.000263311	0.000299888	0.00014564	0	0	8.71606e-05	6.39768e-05	0.000248332	0.00682293	0.0348958	0.0351959	0.00682293	0.00014564	8.71606e-05	0.000346842	0.0422517	83.3007	16.1483	0.344697	0.206289	0.814211	16.3546	83.6454	0.550986	99.449
EIO.MW17.29	07	B	0	0	0.000198895	0.000235431	9.92243e-05	0	0	7.10909e-05	2.69611e-05	0.000158681	0.0042283	0.0213315	0.0215583	0.0042283	9.92243e-05	7.10909e-05	0.000207708	0.0259569	83.0541	16.2897	0.382266	0.273881	0.793852	16.5636	83.4364	0.656147	99.3439
EIO.MW17.29	08	A	0	0	7.44109e-05	0.000221986	9.75619e-05	0	0	6.43067e-05	0.000137516	0.0001365	0.00197094	0.00997901	0.0100638	0.00197094	9.75619e-05	6.43067e-05	0.000292998	0.0121966	82.5132	16.1597	0.799907	0.527249	2.34592	16.6869	83.3131	1.32716	98.6728
EIO.MW17.29	08	B	0	0	8.26258e-05	0.000200148	0.000155979	0	0	4.43435e-05	0.000173798	0.000112625	0.00137497	0.00680335	0.00689754	0.00137497	0.000155979	4.43435e-05	0.000302085	0.00847283	81.4077	16.228	1.84093	0.523362	3.4426	16.7514	83.2486	2.36429	97.6357
EIO.MW17.29	09	A	0	0	0.000120704	0.000122417	6.28356e-05	0	0	4.60758e-05	0.000237669	0.000231998	0.000714049	0.0158468	0.0159844	0.000714049	6.28356e-05	4.60758e-05	0.000501929	0.0168073	95.1036	4.24844	0.373858	0.274141	2.89977	4.52258	95.4774	0.648	99.352
EIO.MW17.29	09	B	0	0	0.00013564	0.000140409	6.67571e-05	0	0	3.49662e-05	0.000127662	0.000250334	0.000804658	0.0181771	0.0183318	0.000804658	6.67571e-05	3.49662e-05	0.000412808	0.0192381	95.2886	4.18262	0.347004	0.181755	2.1007	4.36438	95.6356	0.528759	99.4712
EIO.MW17.35	01	A	0	0.000181188	0	7.56906e-05	0.0259334	0	0	0.00153517	1.48347e-05	0.000250988	0.000127577	0.00129994	0.00129994	0.000127577	0.0261399	0.00153517	0.000300725	0.0291026	4.46675	0.438369	89.8198	5.27503	1.02276	5.7134	94.2866	95.0949	4.90512
EIO.MW17.35	01	B	0	0.000151639	0	5.92e-05	0.0261275	0	0	0.00154987	3.31327e-05	0.000246258	0.000167961	0.00128488	0.00128488	0.000167961	0.0263003	0.00154987	0.000313636	0.029303	4.38481	0.573186	89.7529	5.28912	1.05899	5.86231	94.1377	95.042	4.958
EIO.MW17.35	02	A	0	0.000138708	8.42876e-05	0.000105251	0.0149604	0	0	2.62528e-05	6.97983e-05	0.000291534	0.000532875	0.00792932	0.00802541	0.000532875	0.0151185	2.62528e-05	0.000401874	0.023703	33.8581	2.24813	63.783	0.110757	1.66719	2.35889	97.6411	63.8937	36.1063
EIO.MW17.35	02	B	0	0.000127139	8.37552e-05	0.000155495	0.0121501	0	0	0.000320506	2.11069e-05	0.000263043	0.000353105	0.00649399	0.00658946	0.000353105	0.0122951	0.000320506	0.000320729	0.0195581	33.6917	1.80541	62.8642	1.63873	1.61342	3.44415	96.5559	64.5029	35.4971
EIO.MW17.35	03	A	0	0.000134066	7.14777e-05	0	0.0172235	0	0	0.00100906	0.000173399	0.000327915	0.00116762	0.00921905	0.00930053	0.00116762	0.0173763	0.00100906	0.000546915	0.0288535	32.2337	4.04672	60.2225	3.49717	1.86023	7.54389	92.4561	63.7196	36.2804
EIO.MW17.35	03	B	0	0.00013525	9.14922e-05	0	0.0194649	0	0	0.00130059	0.00019516	0.000342497	0.00139151	0.0101031	0.0102074	0.00139151	0.0196191	0.00130059	0.000585286	0.0325186	31.3893	4.27913	60.332	3.99953	1.76803	8.27866	91.7213	64.3315	35.6685
EIO.MW17.35	04	A	0	0.000142599	0	0	0.0347132	0	0	0.000434949	3.26493e-05	0.000188007	0	0.00156271	0.00156271	0	0.0348758	0.000434949	0.000246801	0.0368734	4.23803	0	94.5824	1.17957	0.664869	1.17957	98.8204	95.762	4.23803
EIO.MW17.35	04	B	0	0.000161543	0	0	0.0324377	0	0	0.000408062	5.25774e-05	0.000166407	0	0.00153915	0.00153915	0	0.0326218	0.000408062	0.000242125	0.034569	4.45239	0	94.3672	1.18043	0.69554	1.18043	98.8196	95.5476	4.45239
EIO.MW17.35	05	A	0	0.000162725	0	0.000111226	0.0208106	0	0	0.000291051	1.73899e-05	0.000209552	0	0.000949532	0.000949532	0	0.0209961	0.000291051	0.000256082	0.0222366	4.27012	0	94.421	1.30888	1.13851	1.30888	98.6911	95.7299	4.27012
EIO.MW17.35	05	B	0	0.000114632	0	9.37082e-05	0.0193477	0	0	0.000272533	1.35387e-05	0.000183118	0	0.000852615	0.000852615	0	0.0194784	0.000272533	0.000222121	0.0206036	4.13819	0	94.5391	1.32275	1.06657	1.32275	98.6773	95.8618	4.13819
EIO.MW17.35	06	A	0	0.000181283	0	0	0.0410701	0	0	0.0011312	0.000129246	0.000322031	0.00015154	0.00194472	0.00194472	0.00015154	0.0412768	0.0011312	0.000496059	0.0445042	4.36974	0.340506	92.748	2.54177	1.10235	2.88228	97.1177	95.2898	4.71025
EIO.MW17.35	06	B	0	0.000222794	0	0	0.0398201	0	0	0.00118349	8.99698e-05	0.000298198	0.000150526	0.00194752	0.00194752	0.000150526	0.040074	0.00118349	0.000429636	0.0433556	4.49197	0.34719	92.4311	2.72972	0.981235	3.07691	96.9231	95.1608	4.83916
EIO.MW17.35	07	A	0	0.000233719	0	0	0.0283237	0	0	0.000714635	0.000159972	0.000210797	0.000808397	0.0131066	0.0131066	0.000808397	0.0285901	0.000714635	0.000400083	0.0432198	30.3255	1.87043	66.1506	1.65349	0.917204	3.52392	96.4761	67.804	32.196
EIO.MW17.35	07	B	0	0.000139452	5.23567e-05	0	0.0280048	0	0	0.000714378	6.5729e-05	0.000199274	0.000805815	0.0128847	0.0129443	0.000805815	0.0281638	0.000714378	0.000292715	0.0426283	30.3656	1.89033	66.0682	1.67583	0.681985	3.56616	96.4338	67.7441	32.2559
EIO.MW17.35	08	A	0	7.6967e-05	0	0	0.0209427	0	0	0.000278551	1.91087e-05	0.000181021	9.77015e-05	0.00102647	0.00102647	9.77015e-05	0.0210305	0.000278551	0.000225303	0.0224332	4.57566	0.435522	93.7471	1.24169	0.994342	1.67721	98.3228	94.9888	5.01118
EIO.MW17.35	08	B	0	0.000119358	0	0	0.0265656	0	0	0.00032905	2.92717e-05	0.000224947	0.000138247	0.00130066	0.00130066	0.000138247	0.0267017	0.00032905	0.0002855	0.0284696	4.56859	0.485596	93.79	1.15579	0.992866	1.64139	98.3586	94.9458	5.05419
EIO.MW17.35	09	A	0	0.000111257	5.15539e-05	0	0.0217863	0	0	0.000278513	7.2363e-05	0.000174232	0.000369764	0.0103194	0.0103782	0.000369764	0.0219131	0.000278513	0.000270824	0.0329396	31.5068	1.12255	66.5251	0.845527	0.81548	1.96808	98.0319	67.3706	32.6294
EIO.MW17.35	09	B	0	0.000102534	6.18627e-05	0	0.0238341	0	0	0.000276453	6.67176e-05	0.000187631	0.000432595	0.0112467	0.0113172	0.000432595	0.0239509	0.000276453	0.00028044	0.0359772	31.4566	1.20242	66.5726	0.768411	0.773466	1.97083	98.0292	67.341	32.659
EIO.MW17.35	10	A	0	0.000119053	0	0.000102259	0.0199787	0	0	0.000469848	1.28537e-05	0.000190447	0.000162937	0.00102435	0.00102435	0.000162937	0.0201145	0.000469848	0.000229785	0.0217716	4.70497	0.748394	92.3886	2.15808	1.04441	2.90647	97.0935	94.5466	5.45337
EIO.MW17.35	10	B	0	0.000130554	0	0.000110685	0.0188625	0	0	0.000515256	1.53762e-05	0.000171406	0.000254889	0.000893277	0.000893277	0.000254889	0.0190113	0.000515256	0.000210617	0.0206747	4.32063	1.23286	91.9543	2.49221	1.00845	3.72506	96.2749	94.4465	5.55349
EIO.MW17.05	01	A	0	9.73815e-05	9.3212e-05	0.000146984	0.00813482	0	0	0.00146947	3.0389e-05	0	0.00186034	0.00534968	0.00545594	0.00186034	0.00824582	0.00146947	3.0389e-05	0.0170316	32.0342	10.9229	48.4149	8.6279	0.17811	19.5508	80.4492	57.0428	42.9572
EIO.MW17.05	01	B	0	6.4778e-05	5.59314e-05	6.14281e-05	0.00642922	0	0	0.00119255	2.31417e-05	0	0.00139415	0.00403196	0.00409572	0.00139415	0.00650306	0.00119255	2.31417e-05	0.0131855	31.0623	10.5734	49.3198	9.04443	0.175201	19.6178	80.3822	58.3643	41.6357
EIO.MW17.05	02	A	0	0.000191153	0	0	0.0235887	0	0	0.000782216	6.57418e-05	0.000132042	0	0.00114361	0.00114361	0	0.0238066	0.000782216	0.000216146	0.0257325	4.44423	0	92.516	3.0398	0.832976	3.0398	96.9602	95.5558	4.44423
EIO.MW17.05	02	B	0	0.000113484	0	0	0.0131623	0	0	0.000367645	4.82176e-05	8.30373e-05	0	0.000628046	0.000628046	0	0.0132916	0.000367645	0.000142802	0.0142873	4.39583	0	93.0309	2.57322	0.989612	2.57322	97.4268	95.6042	4.39583
EIO.MW17.05	03	A	0	0.000264487	0.000202331	0.000652577	0.0196401	0	0	0.000511662	0	0.000169465	0.000415256	0.00899151	0.00922215	0.000415256	0.0199415	0.000511662	0.000193031	0.0300906	30.6479	1.38002	66.2716	1.70041	0.63741	3.08042	96.9196	67.972	32.028
EIO.MW17.05	03	B	0	0.000222901	0.000169716	0.000513213	0.017949	0	0	0.000453831	0	0.000186315	0.000411842	0.00713056	0.00732402	0.000411842	0.018203	0.000453831	0.000212224	0.0263927	27.7501	1.56043	68.9699	1.71953	0.797688	3.27997	96.72	70.6894	29.3106
EIO.MW17.05	04	A	0	0.000294113	0	0.000164764	0.0306142	0	0	0.0015196	0.0105492	0.000750768	0.000147244	0.00149835	0.00149835	0.000147244	0.0309494	0.0015196	0.0114044	0.0341146	4.3921	0.431614	90.7219	4.4544	25.0541	4.88602	95.114	95.1763	4.82371
EIO.MW17.05	04	B	0	0.00035408	0	0.000136912	0.0372944	0	0	0.00198855	0.0115189	0.000900374	0.0001815	0.0017016	0.0017016	0.0001815	0.0376981	0.00198855	0.0125445	0.0415697	4.09336	0.436616	90.6864	4.78365	23.1816	5.22026	94.7797	95.47	4.52998
EIO.MW17.05	05	A	0.000217071	0.000135425	0	0	0.0127051	0	0	0.0248098	7.79216e-05	8.43863e-05	0.00163846	0.00053784	0.00053784	0.00163846	0.0128594	0.0250602	0.000174043	0.0400959	1.34138	4.08635	32.0717	62.5006	0.43219	66.5869	33.4131	94.5723	5.42773
EIO.MW17.05	05	B	0.000163649	9.77829e-05	0	0	0.0122372	0	0	0.0220354	6.15402e-05	6.43149e-05	0.00149634	0.000634959	0.000634959	0.00149634	0.0123486	0.0222242	0.000134799	0.0367041	1.72994	4.07675	33.6438	60.5496	0.365914	64.6263	35.3737	94.1933	5.80669
EIO.MW17.05	06	A	0	0	0.000397578	0.000849899	0.000427919	0	0	3.97647e-05	3.59843e-05	0.000165681	0.000359309	0.0133745	0.0138277	0.000359309	0.000427919	3.97647e-05	0.000224706	0.0146547	94.3568	2.45183	2.92001	0.271344	1.51018	2.72318	97.2768	3.19135	96.8086
EIO.MW17.05	06	B	0	0	0.00041194	0.000800413	0.000540103	0	0	2.93967e-05	3.22713e-05	0.000170775	0.000410208	0.0152999	0.0157694	0.000410208	0.000540103	2.93967e-05	0.000226794	0.0167491	94.1507	2.44913	3.22466	0.175512	1.33597	2.62464	97.3754	3.40017	96.5998
EIO.MW17.05	07	A	0	0.000159223	0	0.000167124	0.0225033	0	0	0.00206019	0.00109306	0.000275145	0.000195905	0.00100995	0.00100995	0.000195905	0.0226848	0.00206019	0.00140647	0.0259508	3.89178	0.754909	87.4145	7.93881	5.1411	8.69372	91.3063	95.3533	4.64669
EIO.MW17.05	07	B	0	0.000164365	0	0.000118507	0.0268996	0	0	0.0019851	0.00105322	0.000310921	0.000249114	0.00121589	0.00121589	0.000249114	0.027087	0.0019851	0.00140738	0.0305371	3.98168	0.815776	88.7019	6.50064	4.40571	7.31641	92.6836	95.2025	4.79746
EIO.MW17.05	08	A	0	0.000140518	0.000205478	0.000543212	0.0116733	0	0	0.000543693	4.21196e-05	0.00012081	0.000836189	0.0086002	0.00883443	0.000836189	0.0118335	0.000543693	0.000179729	0.0220478	40.0694	3.79262	53.672	2.46597	0.808589	6.25859	93.7414	56.138	43.862
EIO.MW17.05	08	B	0	0.000165047	0.000216783	0.00058223	0.0127559	0	0	0.000573811	5.13347e-05	0.000122495	0.000861703	0.00918988	0.00943699	0.000861703	0.012944	0.000573811	0.000190864	0.0238165	39.6237	3.61809	54.3489	2.40929	0.795022	6.02738	93.9726	56.7582	43.2418
EIO.MW17.05	09	A	0	0	0.000287866	0.000515213	0.000541657	0	0	4.50456e-05	0.000139009	8.83387e-05	0.000816704	0.00888816	0.00921631	0.000816704	0.000541657	4.50456e-05	0.000239632	0.0106197	86.7849	7.69046	5.10049	0.424169	2.20669	8.11463	91.8854	5.52465	94.4753
EIO.MW17.05	09	B	0	0	0.000264839	0.000392568	0.000697364	0	0	5.47761e-05	0.00020579	0.000134961	0.00104694	0.012283	0.0125849	0.00104694	0.000697364	5.47761e-05	0.00035952	0.014384	87.4925	7.27852	4.8482	0.380813	2.43849	7.65933	92.3407	5.22901	94.771
EIO.MW17.05	10	A	0	9.90123e-05	9.11155e-05	0.00024979	0.00838345	0	0	0.000213272	7.33629e-05	0.00012686	0.000311078	0.00320717	0.00331104	0.000311078	0.00849632	0.000213272	0.000217864	0.0123317	26.8498	2.52259	68.8982	1.72946	1.73603	4.25205	95.7479	70.6276	29.3724
EIO.MW17.05	10	B	0	8.11418e-05	0.000102724	0.000413885	0.00785153	0	0	0.00019511	0.000120215	0.000127192	0.000287142	0.00510355	0.00522065	0.000287142	0.00794403	0.00019511	0.000265095	0.0136469	38.2551	2.10408	58.2111	1.4297	1.90551	3.53378	96.4662	59.6408	40.3592
EIO.MW17.25	01	A	0	0.000108808	0	0	0.0352689	0	0	0.000222965	0.000257671	0	0	0.00162221	0.00162221	0	0.0353929	0.000222965	0.000257671	0.0372381	4.35632	0	95.0449	0.598755	0.687201	0.598755	99.4012	95.6437	4.35632
EIO.MW17.25	01	B	0	0.000118898	0	0	0.0400857	0	0	0.000251087	0.000336184	0	0	0.00195791	0.00195791	0	0.0402212	0.000251087	0.000336184	0.0424302	4.61443	0	94.7938	0.591765	0.786093	0.591765	99.4082	95.3856	4.61443
EIO.MW17.25	02	A	0	6.24548e-05	0	0	0.0218225	0	0	0.000121221	4.21803e-05	0	0	0.000976616	0.000976616	0	0.0218937	0.000121221	4.21803e-05	0.0229915	4.24772	0	95.225	0.527244	0.183125	0.527244	99.4728	95.7523	4.24772
EIO.MW17.25	02	B	0	9.13698e-05	0	0	0.0191717	0	0	0.000117269	2.07828e-05	0	0	0.000836669	0.000836669	0	0.0192758	0.000117269	2.07828e-05	0.0202298	4.13583	0	95.2845	0.579683	0.102628	0.579683	99.4203	95.8642	4.13583
EIO.MW17.25	03	A	0	7.20211e-05	0	0	0.0323823	0	0	0.000205168	0.000435715	8.86815e-05	0	0.00150944	0.00150944	0	0.0324644	0.000205168	0.000536728	0.034179	4.41627	0	94.9835	0.600275	1.54607	0.600275	99.3997	95.5837	4.41627
EIO.MW17.25	03	B	0	0.000105541	0	0	0.0308058	0	0	0.000201023	0.000409895	8.51877e-05	0	0.00146185	0.00146185	0	0.0309261	0.000201023	0.000506929	0.032589	4.4857	0	94.8975	0.616844	1.5317	0.616844	99.3832	95.5143	4.4857
EIO.MW17.25	04	A	0	0	0	0	0.015822	0	0	8.92196e-05	0.000162885	6.53011e-05	0.000194161	0.0143611	0.0143611	0.000194161	0.015822	8.92196e-05	0.000237267	0.0304664	47.1374	0.637294	51.9324	0.292846	0.772763	0.93014	99.0699	52.2253	47.7747
EIO.MW17.25	04	B	0	0	0	0	0.0245757	0	0	0.000136804	0.000262445	0.000123304	0.000345263	0.0267619	0.0267619	0.000345263	0.0245757	0.000136804	0.000402895	0.0518197	51.6443	0.666277	47.4254	0.263999	0.771495	0.930276	99.0697	47.6894	52.3106
EIO.MW17.25	05	A	0	0.000118197	0	0	0.0396978	0	0	0.000270591	0.000335177	0	0	0.00190216	0.00190216	0	0.0398326	0.000270591	0.000335177	0.0420053	4.52837	0	94.8274	0.644182	0.791623	0.644182	99.3558	95.4716	4.52837
EIO.MW17.25	05	B	0	0.0001233	0	0	0.0381847	0	0	0.000266313	0.000297831	0	0	0.00186615	0.00186615	0	0.0383252	0.000266313	0.000297831	0.0404577	4.61259	0	94.7292	0.658252	0.730774	0.658252	99.3417	95.3874	4.61259
EIO.MW17.25	06	A	0	9.17403e-05	0	0	0.0328526	0	0	0.00021096	0.000132828	0	0	0.00159637	0.00159637	0	0.0329572	0.00021096	0.000132828	0.0347645	4.59196	0	94.8012	0.606825	0.380625	0.606825	99.3932	95.408	4.59196
EIO.MW17.25	06	B	0	0.000104458	0	0	0.0345576	0	0	0.000210583	0.000102106	0	0	0.00163362	0.00163362	0	0.0346767	0.000210583	0.000102106	0.0365209	4.47311	0	94.9503	0.57661	0.278803	0.57661	99.4234	95.5269	4.47311
EIO.MW17.25	07	A	0	0.000141377	0	0	0.0430434	0	0	0.000274361	0.000467301	7.07101e-05	0	0.00203227	0.00203227	0	0.0432045	0.000274361	0.000547845	0.0455111	4.46544	0	94.9317	0.602843	1.18944	0.602843	99.3972	95.5346	4.46544
EIO.MW17.25	07	B	0	0.000137499	0	0	0.0431861	0	0	0.000287162	0.000436272	8.70704e-05	0	0.00207508	0.00207508	0	0.0433429	0.000287162	0.000535451	0.0457051	4.54015	0	94.8316	0.628294	1.15797	0.628294	99.3717	95.4599	4.54015
EIO.MW17.25	08	A	0	0	0	0	0.0181398	0	0	0.000133557	0.000130299	0	0.000302569	0.0161388	0.0161388	0.000302569	0.0181398	0.000133557	0.000130299	0.0347148	46.4898	0.871587	52.2539	0.384726	0.373939	1.25631	98.7437	52.6386	47.3614
EIO.MW17.25	08	B	0	0	0	0	0.0207847	0	0	0.000151899	0.000170948	0	0.000324846	0.0187058	0.0187058	0.000324846	0.0207847	0.000151899	0.000170948	0.0399672	46.8029	0.81278	52.0042	0.380059	0.425898	1.19284	98.8072	52.3843	47.6157
EIO.MW17.25	09	A	0	7.65953e-05	7.4201e-05	0	0.0226483	0	0	0.00017077	0.000172162	8.53528e-05	0.000433046	0.0224719	0.0225565	0.000433046	0.0227357	0.00017077	0.000269384	0.045896	49.147	0.943538	49.5373	0.37208	0.58352	1.31562	98.6844	49.9094	50.0906
EIO.MW17.25	09	B	0	9.23774e-05	6.62951e-05	0	0.022114	0	0	0.000180889	0.000168279	0.000123117	0.000403362	0.0222865	0.022362	0.000403362	0.0222193	0.000180889	0.000308516	0.0451656	49.5112	0.893074	49.1952	0.400502	0.678443	1.29358	98.7064	49.5957	50.4043
EIO.MW17.25	10	A	0	8.87059e-05	0	0	0.0478414	0	0	0.00033456	0.000427658	0	0	0.00224524	0.00224524	0	0.0479425	0.00033456	0.000427658	0.0505223	4.44405	0	94.8937	0.662203	0.839369	0.662203	99.3378	95.556	4.44405
EIO.MW17.25	10	B	0	0.000121233	0	0	0.0476481	0	0	0.000319305	0.000333271	0	0	0.00219575	0.00219575	0	0.0477863	0.000319305	0.000333271	0.0503014	4.3652	0	95	0.634784	0.658187	0.634784	99.3652	95.6348	4.3652
EIO.MW17.32	01	A	0	0.000196827	8.04717e-05	0	0.0256575	0	0	0.000563369	1.76867e-05	0	0.000535368	0.0115741	0.0116659	0.000535368	0.0258819	0.000563369	1.76867e-05	0.0386465	30.1861	1.3853	66.9709	1.45775	0.0457443	2.84305	97.157	68.4286	31.5714
EIO.MW17.32	01	B	0	0.000189437	7.10042e-05	0	0.025313	0	0	0.000583377	9.89958e-05	0	0.000554896	0.0111547	0.0112357	0.000554896	0.025529	0.000583377	9.89958e-05	0.0379029	29.6433	1.46399	67.3536	1.53914	0.260502	3.00313	96.9969	68.8928	31.1072
EIO.MW17.32	02	A	0	0.000189823	8.67771e-05	8.85926e-05	0.0234986	0	0	0.000457962	3.68476e-05	8.77153e-05	0.000553545	0.0108449	0.0109438	0.000553545	0.023715	0.000457962	0.000136761	0.0356703	30.6805	1.55184	66.4838	1.28387	0.381937	2.83571	97.1643	67.7677	32.2323
EIO.MW17.32	02	B	0	0.000218987	9.74944e-05	8.43674e-05	0.0242284	0	0	0.00046246	7.94396e-05	6.33949e-05	0.00044869	0.0112314	0.0113426	0.00044869	0.024478	0.00046246	0.00015165	0.0367317	30.8795	1.22153	66.64	1.25902	0.411162	2.48056	97.5194	67.899	32.101
EIO.MW17.32	03	A	0	0.0004254	0	0	0.0557058	0	0	0.00127005	0.000490044	0.000110171	0.000197519	0.00248014	0.00248014	0.000197519	0.0561907	0.00127005	0.000615535	0.0601384	4.12405	0.328441	93.4356	2.11189	1.01316	2.44033	97.5597	95.5475	4.45249
EIO.MW17.32	03	B	0	0.000529003	0	0	0.0555405	0	0	0.00123029	0.000467349	0.000127975	0.000183355	0.00248867	0.00248867	0.000183355	0.0561436	0.00123029	0.00061312	0.0600459	4.14461	0.305358	93.5011	2.04891	1.01076	2.35427	97.6457	95.55	4.44997
EIO.MW17.32	04	A	0	0.00015544	6.38353e-05	0	0.0185927	0	0	0.000262773	7.1464e-05	0	0.000334971	0.00849419	0.00856696	0.000334971	0.0187699	0.000262773	7.1464e-05	0.0279346	30.668	1.19913	67.1922	0.940674	0.255174	2.1398	97.8602	68.1329	31.8671
EIO.MW17.32	04	B	0	0.000242483	0.0001044	0	0.0250093	0	0	0.000333509	9.33378e-05	0	0.000392241	0.0114517	0.0115708	0.000392241	0.0252857	0.000333509	9.33378e-05	0.0375822	30.7878	1.04369	67.2811	0.887411	0.247741	1.9311	98.0689	68.1685	31.8315
EIO.MW17.32	05	A	0	0.000491284	0.00018901	0	0.0477829	0	0	0.00041982	0.000333473	0.000115376	0.000422472	0.023225	0.0234404	0.000422472	0.0483429	0.00041982	0.000464893	0.0726257	32.2757	0.581711	66.5645	0.57806	0.636051	1.15977	98.8402	67.1426	32.8574
EIO.MW17.32	05	B	0	0.000469975	0.000176279	0	0.0470261	0	0	0.000423757	0.000322477	0.000120465	0.000404808	0.022682	0.022883	0.000404808	0.0475619	0.000423757	0.000459694	0.0712734	32.1059	0.567965	66.7316	0.594552	0.640839	1.16252	98.8375	67.3261	32.6739
EIO.MW17.32	06	A	0	0.000180241	8.49759e-05	0.000112165	0.0167801	0	0	0.000201214	5.91529e-05	6.49992e-05	0.000205469	0.00738626	0.00748313	0.000205469	0.0169856	0.000201214	0.000133191	0.0248754	30.0824	0.825991	68.2827	0.808888	0.53258	1.63488	98.3651	69.0916	30.9084
EIO.MW17.32	06	B	0	0.000224202	9.29924e-05	0.000134564	0.0194926	0	0	0.000229315	8.16534e-05	9.97717e-05	0.000192526	0.00817826	0.00828426	0.000192526	0.0197482	0.000229315	0.000195299	0.0284543	29.1143	0.676614	69.4032	0.805906	0.681683	1.48252	98.5175	70.2091	29.7909
EIO.MW17.32	07	A	0	0	0.000140745	0	8.34255e-05	0	0	0	0.00012067	0	0.000341139	0.0144936	0.014654	0.000341139	8.34255e-05	0	0.00012067	0.0150786	97.1843	2.26241	0.553273	0	0.793923	2.26241	97.7376	0.553273	99.4467
EIO.MW17.32	07	B	0	0	0.000146584	0	9.00449e-05	0	0	0	0.00012134	0	0.00034688	0.0143634	0.0145305	0.00034688	9.00449e-05	0	0.00012134	0.0149674	97.0808	2.31756	0.601606	0	0.804177	2.31756	97.6824	0.601606	99.3984
EIO.MW17.32	08	A	0	0	0.000301443	0	0.000222499	0	0	0	0.00044446	0.000117023	0.000821253	0.056494	0.0568376	0.000821253	0.000222499	0	0.000577757	0.0578814	98.1967	1.41885	0.384406	0	0.988309	1.41885	98.5811	0.384406	99.6156
EIO.MW17.32	08	B	0	0	0.000277858	0	0.000201173	0	0	0	0.000367089	0.000115082	0.000739476	0.0512294	0.0515461	0.000739476	0.000201173	0	0.000498174	0.0524868	98.2078	1.40888	0.383282	0	0.940217	1.40888	98.5911	0.383282	99.6167
EIO.MW17.32	09	A	0	0.000319783	0.000139331	0	0.0280552	0	0	0.000309365	0.00015163	0	0.00026501	0.0132949	0.0134537	0.00026501	0.0284197	0.000309365	0.00015163	0.0424478	31.6948	0.624319	66.9521	0.728814	0.355943	1.35313	98.6469	67.6809	32.3191
EIO.MW17.32	09	B	0	0.000314836	0.000126677	0	0.0282617	0	0	0.000300956	0.000119263	0	0.000287067	0.0136089	0.0137533	0.000287067	0.0286206	0.000300956	0.000119263	0.0429619	32.0127	0.668191	66.6186	0.700519	0.276834	1.36871	98.6313	67.3191	32.6809
EIO.MW17.32	10	A	0	0	0.00015254	0	0.00012082	0	0	0	2.78789e-05	0	0.000459141	0.0216164	0.0217903	0.000459141	0.00012082	0	2.78789e-05	0.0223703	97.4074	2.05246	0.540091	0	0.12447	2.05246	97.9475	0.540091	99.4599
EIO.MW17.32	10	B	0	0	0.000217416	0	0.00012292	0	0	0	3.74336e-05	0	0.000553448	0.0255052	0.025753	0.000553448	0.00012292	0	3.74336e-05	0.0264294	97.4408	2.09406	0.46509	0	0.141436	2.09406	97.9059	0.46509	99.5349
EIO.MW17.45	01	A	0	0	0.00029417	0	0.000202623	0	0	4.44678e-05	0.000189741	9.32573e-05	0.00405232	0.0586453	0.0589806	0.00405232	0.000202623	4.44678e-05	0.000295967	0.06328	93.2057	6.40379	0.320201	0.0702714	0.465533	6.47406	93.5259	0.390472	99.6095
EIO.MW17.45	01	B	0	0	0.000311442	0	0.000206241	0	0	5.41435e-05	0.000153364	8.52321e-05	0.00368142	0.0626348	0.0629899	0.00368142	0.000206241	5.41435e-05	0.000250448	0.0669317	94.1107	5.50027	0.308137	0.0808938	0.37279	5.58116	94.4188	0.38903	99.611
EIO.MW17.45	02	A	0	0	0.000338562	0	0.000104914	0	0	4.70383e-05	4.44911e-05	0	0.00275813	0.0306088	0.0309947	0.00275813	0.000104914	4.70383e-05	4.44911e-05	0.0339048	91.4169	8.13493	0.309436	0.138736	0.131052	8.27366	91.7263	0.448173	99.5518
EIO.MW17.45	02	B	0	0	0.000243458	0	0.000119853	0	0	3.96884e-05	4.54533e-05	0	0.00301109	0.03244	0.0327176	0.00301109	0.000119853	3.96884e-05	4.54533e-05	0.0358882	91.1653	8.3902	0.333962	0.110589	0.126492	8.50078	91.4992	0.444551	99.5554
EIO.MW17.45	03	A	0	0	0.000398124	0	0.000188046	0	0	4.21004e-05	0.000252795	0.000163613	0.00330857	0.056266	0.0567198	0.00330857	0.000188046	4.21004e-05	0.000439161	0.0602585	94.1275	5.49062	0.312066	0.0698663	0.723521	5.56048	94.4395	0.381932	99.6181
EIO.MW17.45	03	B	0	0	0.00044946	0	0.00021289	0	0	5.24816e-05	0.000376481	0.000187797	0.00403352	0.0648181	0.0653305	0.00403352	0.00021289	5.24816e-05	0.000590394	0.0696294	93.826	5.79284	0.305747	0.0753729	0.84078	5.86821	94.1318	0.38112	99.6189
EIO.MW17.45	04	A	0	0	0.000405369	0	0.000232602	0	0	0	0.000952736	0.000184645	0.000727918	0.0643286	0.0647907	0.000727918	0.000232602	0	0.00116306	0.0657512	98.5392	1.10708	0.353762	0	1.73813	1.10708	98.8929	0.353762	99.6462
EIO.MW17.45	04	B	0	0	0.000467539	0	0.000283946	0	0	0	0.00117146	0.000225986	0.000931284	0.0769878	0.0775208	0.000931284	0.000283946	0	0.00142887	0.078736	98.4566	1.18279	0.36063	0	1.78242	1.18279	98.8172	0.36063	99.6394
EIO.MW17.45	05	A	0	0	0.000302573	0	0.000219885	0	0	0	0.000292746	0.000102568	0.000626026	0.0539685	0.0543134	0.000626026	0.000219885	0	0.000409577	0.0551593	98.4664	1.13494	0.398636	0	0.737061	1.13494	98.8651	0.398636	99.6014
EIO.MW17.45	05	B	0	0	0.000294609	0	0.000212091	0	0	0	0.000285996	9.58166e-05	0.000614729	0.0562291	0.056565	0.000614729	0.000212091	0	0.000395137	0.0573918	98.5593	1.07111	0.36955	0	0.683782	1.07111	98.9289	0.36955	99.6305
EIO.MW17.45	06	A	0	0	0.000395144	0	0.000168039	0	0	5.13843e-05	0.000119107	0	0.0023335	0.0467926	0.0472431	0.0023335	0.000168039	5.13843e-05	0.000119107	0.049796	94.8732	4.68611	0.337454	0.10319	0.23862	4.7893	95.2107	0.440644	99.5594
EIO.MW17.45	06	B	0	0	0.000381334	0	0.000157333	0	0	6.10069e-05	8.19565e-05	0	0.00227232	0.0480718	0.0485065	0.00227232	0.000157333	6.10069e-05	8.19565e-05	0.0509971	95.1161	4.45578	0.308514	0.119628	0.16045	4.57541	95.4246	0.428142	99.5719
EIO.MW17.45	07	A	0	0	0.000214821	0	0.000173806	0	0	3.10094e-05	0.000165833	9.19874e-05	0.00243828	0.0397438	0.0399887	0.00243828	0.000173806	3.10094e-05	0.000270612	0.0426318	93.8002	5.7194	0.407692	0.0727377	0.630762	5.79214	94.2079	0.48043	99.5196
EIO.MW17.45	07	B	0	0	0.00019156	0	0.000147676	0	0	3.32247e-05	0.000223012	0.000121078	0.00250527	0.0395639	0.0397823	0.00250527	0.000147676	3.32247e-05	0.000360927	0.0424684	93.6749	5.89913	0.347731	0.0782337	0.842708	5.97736	94.0226	0.425965	99.574
EIO.MW17.45	08	A	0	0	0.000348401	0	0.000143384	8.92294e-05	0	9.19391e-05	5.33656e-05	0	0.00372764	0.0370586	0.0374558	0.00383057	0.000143384	9.19391e-05	5.33656e-05	0.0415216	90.2078	9.22549	0.345324	0.221425	0.12836	9.44691	90.5531	0.566748	99.4333
EIO.MW17.45	08	B	0	0	0.000200239	0	0.000145608	9.10321e-05	0	4.98881e-05	5.12995e-05	0	0.00341774	0.0404021	0.0406304	0.00352276	0.000145608	4.98881e-05	5.12995e-05	0.0443486	91.6158	7.94334	0.328325	0.112491	0.11554	8.05583	91.9442	0.440816	99.5592
EIO.MW17.45	09	A	0	0	0.000158525	0	0.000222868	0	0	4.70891e-05	0.000940189	0.000146185	0.00195771	0.062613	0.0627937	0.00195771	0.000222868	4.70891e-05	0.0011067	0.0650214	96.5739	3.01088	0.342761	0.0724209	1.67358	3.0833	96.9167	0.415182	99.5848
EIO.MW17.45	09	B	0	0	0.000170449	0	0.000234617	0	0	4.04564e-05	0.00106807	0.000153107	0.00208171	0.0666925	0.0668868	0.00208171	0.000234617	4.04564e-05	0.00124246	0.0692436	96.5964	3.00636	0.338828	0.0584262	1.76271	3.06478	96.9352	0.397255	99.6027
EIO.MW17.45	10	A	0	0	0.000158938	0	0.000166172	0	0	4.08721e-05	0.000206539	0	0.00314134	0.045315	0.0454961	0.00314134	0.000166172	4.08721e-05	0.000206539	0.0488445	93.1448	6.43131	0.340205	0.0836779	0.421069	6.51499	93.485	0.423883	99.5761
EIO.MW17.45	10	B	0	0	0.000158314	0	0.000154688	0	0	4.4475e-05	0.000199163	0	0.00270966	0.0423395	0.04252	0.00270966	0.000154688	4.4475e-05	0.000199163	0.0454288	93.597	5.96462	0.340506	0.0979005	0.436493	6.06252	93.9375	0.438407	99.5616
EIO.MW15.A	01	A	0	0	7.39081e-05	0	5.08886e-05	0	0	0	6.98129e-05	0	0.000261637	0.0125214	0.0126056	0.000261637	5.08886e-05	0	6.98129e-05	0.0129182	97.5807	2.02534	0.39393	0	0.537519	2.02534	97.9747	0.39393	99.6061
EIO.MW15.A	01	B	0	0	8.08384e-05	0	3.71782e-05	0	0	0	5.96189e-05	0	0.000294312	0.0142983	0.0143904	0.000294312	3.71782e-05	0	5.96189e-05	0.0147219	97.7483	1.99914	0.252537	0	0.403334	1.99914	98.0009	0.252537	99.7475
EIO.MW15.A	02	A	0	0	9.5976e-05	0	2.16557e-05	0	0	0	2.16978e-05	0	0.000261474	0.0102182	0.0103276	0.000261474	2.16557e-05	0	2.16978e-05	0.0106108	97.3317	2.46423	0.204092	0	0.204071	2.46423	97.5358	0.204092	99.7959
EIO.MW15.A	02	B	0	0	0.000119416	0	4.01236e-05	0	0	0	3.14985e-05	0	0.000239677	0.0114645	0.0116007	0.000239677	4.01236e-05	0	3.14985e-05	0.0118805	97.6449	2.0174	0.337728	0	0.264428	2.0174	97.9826	0.337728	99.6623
EIO.MW15.A	03	A	0	0	9.42212e-05	0	6.08367e-05	0	0	0	5.17028e-05	0	0.000317192	0.0159916	0.016099	0.000317192	6.08367e-05	0	5.17028e-05	0.016477	97.7057	1.92505	0.369222	0	0.312806	1.92505	98.0749	0.369222	99.6308
EIO.MW15.A	03	B	0	0	8.11938e-05	0	3.37664e-05	0	0	0	2.57821e-05	0	0.000249838	0.0128258	0.0129183	0.000249838	3.37664e-05	0	2.57821e-05	0.0132019	97.8518	1.89243	0.255769	0	0.19491	1.89243	98.1076	0.255769	99.7442
EIO.MW15.A	04	A	0	0	0	0	2.52e-05	0	0	0	2.48965e-05	0	0.000169244	0.00603057	0.00603057	0.000169244	2.52e-05	0	2.48965e-05	0.00622502	96.8764	2.71877	0.404818	0	0.398349	2.71877	97.2812	0.404818	99.5952
EIO.MW15.A	04	B	0	0	0	0	2.52098e-05	0	0	0	1.58668e-05	0	0.000190663	0.00686866	0.00686866	0.000190663	2.52098e-05	0	1.58668e-05	0.00708453	96.9529	2.69125	0.355843	0	0.223463	2.69125	97.3087	0.355843	99.6442
EIO.MW15.A	05	A	0	0	0.000183828	0	8.87515e-05	0	0	0	9.12742e-05	7.32744e-05	0.000795818	0.030432	0.0306415	0.000795818	8.87515e-05	0	0.000174738	0.0315261	97.1942	2.52431	0.281517	0	0.55121	2.52431	97.4757	0.281517	99.7185
EIO.MW15.A	05	B	0	0	0.000178063	0	8.11083e-05	0	0	0	0.00010879	7.62924e-05	0.00073563	0.0284518	0.0286548	0.00073563	8.11083e-05	0	0.000195692	0.0294716	97.2287	2.49607	0.275209	0	0.659623	2.49607	97.5039	0.275209	99.7248
EIO.MW15.A	06	A	0	0	0.000109707	0	4.56689e-05	0	0	0	2.6903e-05	0	0.00026084	0.01163	0.0117551	0.00026084	4.56689e-05	0	2.6903e-05	0.0120616	97.4588	2.16256	0.37863	0	0.22255	2.16256	97.8374	0.37863	99.6214
EIO.MW15.A	06	B	0	0	0.00011653	0	5.1829e-05	0	0	0	3.08607e-05	0	0.000293204	0.0142403	0.0143731	0.000293204	5.1829e-05	0	3.08607e-05	0.0147182	97.6557	1.99212	0.352143	0	0.209239	1.99212	98.0079	0.352143	99.6479
EIO.MW15.A	07	A	0	0	0	0	0	0	0	0	1.83541e-05	0	0.000134219	0.00585144	0.00585144	0.000134219	0	0	1.83541e-05	0.00598566	97.7577	2.24234	0	0	0.305698	2.24234	97.7577	0	100
EIO.MW15.A	07	B	0	0	0	0	0	0	0	0	2.0379e-05	0	0.000101535	0.00506786	0.00506786	0.000101535	0	0	2.0379e-05	0.00516939	98.0358	1.96416	0	0	0.392677	1.96416	98.0358	0	100
EIO.MW15.A	08	A	0	0	6.56678e-05	0	0	0	0	0	2.92822e-05	0	0.000225764	0.00865648	0.00873134	0.000225764	0	0	2.92822e-05	0.0089571	97.4795	2.5205	0	0	0.32585	2.5205	97.4795	0	100
EIO.MW15.A	08	B	0	0	6.32842e-05	0	0	0	0	0	1.69215e-05	0	0.00018276	0.00623733	0.00630946	0.00018276	0	0	1.69215e-05	0.00649222	97.1849	2.81506	0	0	0.259966	2.81506	97.1849	0	100
EIO.MW15.A	09	A	0	0	0.000101571	0	5.83667e-05	0	0	0	6.62477e-05	0	0.000415486	0.0176352	0.017751	0.000415486	5.83667e-05	0	6.62477e-05	0.0182249	97.4	2.27978	0.320259	0	0.362186	2.27978	97.7202	0.320259	99.6797
EIO.MW15.A	09	B	0	0	0	0	7.77286e-05	0	0	0	4.41856e-05	0	0.000455491	0.0215481	0.0215481	0.000455491	7.77286e-05	0	4.41856e-05	0.0220813	97.5852	2.06279	0.352011	0	0.199705	2.06279	97.9372	0.352011	99.648
EIO.MW15.A	10	A	0	0	0	0	0	0	0	0	2.88957e-05	0	9.93619e-05	0.00521702	0.00521702	9.93619e-05	0	0	2.88957e-05	0.00531638	98.131	1.86898	0	0	0.540584	1.86898	98.131	0	100
EIO.MW15.A	10	B	0	0	0	0	0	0	0	0	2.15689e-05	0	0.00010801	0.00644835	0.00644835	0.00010801	0	0	2.15689e-05	0.00655636	98.3526	1.64741	0	0	0.327897	1.64741	98.3526	0	100
EIO.MW17.24	01	A	0	0.000128474	8.5932e-05	0.000102521	0.0150585	0	0	0.00117056	0.00032083	6.32249e-05	0.00147143	0.0092525	0.00935046	0.00147143	0.015205	0.00117056	0.000392847	0.0271974	34.3799	5.41017	55.9059	4.30395	1.42386	9.71411	90.2859	60.2099	39.7901
EIO.MW17.24	01	B	0	0.000122815	9.03108e-05	0.000116406	0.0139516	0	0	0.00111274	0.000510571	6.55874e-05	0.00148561	0.00868039	0.00878334	0.00148561	0.0140916	0.00111274	0.000585279	0.0254733	34.4806	5.83202	55.3191	4.36826	2.24602	10.2003	89.7997	59.6874	40.3126
EIO.MW17.24	02	A	0	0	0	8.95099e-05	0.00512284	0.000127064	0	0.00288902	0	0	0.0050185	0.00475432	0.00475432	0.00516508	0.00512284	0.00288902	0	0.0179313	26.5141	28.8049	28.5693	16.1116	0	44.9165	55.0835	44.681	55.319
EIO.MW17.24	02	B	0	0	0	7.82386e-05	0.00486291	9.87456e-05	0	0.00249985	0	0	0.00456978	0.00447729	0.00447729	0.00468369	0.00486291	0.00249985	0	0.0165238	27.0961	28.3452	29.4298	15.1288	0	43.4741	56.5259	44.5587	55.4413
EIO.MW17.24	03	A	0	0.000125924	0	0	0.0256964	0	0	0.00589683	0.000124733	0	0.000413925	0.0012893	0.0012893	0.000413925	0.0258399	0.00589683	0.000124733	0.03344	3.85556	1.23782	77.2725	17.6341	0.371619	18.8719	81.1281	94.9066	5.09337
EIO.MW17.24	03	B	0	0.000107253	0	0	0.0198219	0	0	0.00523416	0.000102867	0	0.000391216	0.0010328	0.0010328	0.000391216	0.0199441	0.00523416	0.000102867	0.0266023	3.88239	1.47061	74.9714	19.6756	0.385197	21.1462	78.8538	94.647	5.35299
EIO.MW17.24	04	A	0.000102084	0.000168711	0	0.000102513	0.0197379	0	0	0.00512361	0.000166004	7.04561e-05	0.000369274	0.00102504	0.00102504	0.000369274	0.0199302	0.00524138	0.000246258	0.0265659	3.8585	1.39003	75.0217	19.7297	0.918456	21.1198	78.8802	94.7515	5.24853
EIO.MW17.24	04	B	9.46181e-05	0.000183203	0	0.000112187	0.0218609	0	0	0.00603739	0.000203649	6.95199e-05	0.000449037	0.00112733	0.00112733	0.000449037	0.0220698	0.00614654	0.000282837	0.0297927	3.78391	1.50721	74.0778	20.631	0.940422	22.1382	77.8618	94.7089	5.29112
EIO.MW17.24	05	A	0	0.000140289	0	0.000129586	0.014566	0	0	0.00143457	0.000117413	0.000185329	0.000121538	0.000802801	0.000802801	0.000121538	0.0147259	0.00143457	0.000328514	0.0170848	4.69892	0.711379	86.1929	8.39679	1.88657	9.10817	90.8918	94.5897	5.4103
EIO.MW17.24	05	B	0	9.52877e-05	0	9.16e-05	0.0115988	0	0	0.00113202	5.86037e-05	0.000178386	8.94404e-05	0.000702599	0.000702599	8.94404e-05	0.0117074	0.00113202	0.000261797	0.0136315	5.15423	0.65613	85.8852	8.30445	1.88434	8.96058	91.0394	94.1896	5.81036
EIO.MW17.24	06	A	0	0.000192031	0	0	0.0294713	0	0	0.00208058	7.57868e-05	0	0.000164168	0.00143437	0.00143437	0.000164168	0.0296902	0.00208058	7.57868e-05	0.0333693	4.29848	0.491974	88.9745	6.235	0.226601	6.72698	93.273	95.2095	4.79045
EIO.MW17.24	06	B	0	0.000167555	0	0	0.0300924	0	0	0.00203027	8.45771e-05	0	0.000176714	0.00140169	0.00140169	0.000176714	0.0302834	0.00203027	8.45771e-05	0.0338921	4.13574	0.521403	89.3525	5.9904	0.248927	6.5118	93.4882	95.3429	4.65714
EIO.MW17.24	07	A	0	0	7.51307e-05	0.00015384	0.00688293	0	0	0.000490893	0	0	0.00084455	0.00672701	0.00681265	0.00084455	0.00688293	0.000490893	0	0.015031	45.3239	5.61871	45.7915	3.26587	0	8.88458	91.1154	49.0574	50.9426
EIO.MW17.24	07	B	0	0	4.76647e-05	0.000118109	0.00589037	0	0	0.000375411	0	0	0.000688603	0.00597565	0.00602998	0.000688603	0.00589037	0.000375411	0	0.0129844	46.4403	5.30333	45.3651	2.89125	0	8.19458	91.8054	48.2564	51.7436
EIO.MW17.24	08	A	0	0	0	0	0.00322239	0	0	0.000301714	0	0	0	0.000122594	0.000122594	0	0.00322239	0.000301714	0	0.0036467	3.36179	0	88.3646	8.27361	0	8.27361	91.7264	96.6382	3.36179
EIO.MW17.24	08	B	0	0	0	0	0.00407534	0	0	0.000350606	0	0	0	0.000286636	0.000286636	0	0.00407534	0.000350606	0	0.00471259	6.08234	0	86.4779	7.43978	0	7.43978	92.5602	93.9177	6.08234
EIO.MW17.24	09	A	0	0	0	0	0.00618907	0	0	8.15902e-05	0	0.000116953	0.000126405	0.00539086	0.00539086	0.000126405	0.00618907	8.15902e-05	0.000133216	0.0117879	45.732	1.07232	52.5035	0.692151	1.11748	1.76447	98.2355	53.1956	46.8044
EIO.MW17.24	09	B	0	0	0	0	0.0073569	0	0	0.000121085	0	0.000111119	0.000106868	0.00573885	0.00573885	0.000106868	0.0073569	0.000121085	0.000126572	0.0133237	43.0725	0.802088	55.2166	0.908792	0.941033	1.71088	98.2891	56.1254	43.8746
EIO.MW17.24	10	A	0	0	8.89665e-05	0.00014656	0.00285266	0	0	0.000148318	8.07161e-05	0	0.000349575	0.00338985	0.00349126	0.000349575	0.00285266	0.000148318	8.07161e-05	0.00684181	51.0283	5.10939	41.6945	2.16781	1.16599	7.2772	92.7228	43.8623	56.1377
EIO.MW17.24	10	B	0	0	7.48172e-05	0.000133696	0.00262921	0	0	0.000136474	0.000103563	0	0.000343008	0.0031303	0.00321559	0.000343008	0.00262921	0.000136474	0.000103563	0.00632428	50.8451	5.42367	41.5733	2.15794	1.61116	7.58161	92.4184	43.7312	56.2688
EIO.MW15.X	01	A	0	0.000196329	0	0.000229829	0.0135549	0	0	0.000545327	3.02075e-05	0.000753357	0.000145098	0.000532041	0.000532041	0.000145098	0.0137787	0.000545327	0.000888327	0.0150011	3.54668	0.967249	91.8508	3.63524	5.59067	4.60249	95.3975	95.4861	4.51393
EIO.MW15.X	01	B	0	0.000198348	0	0.000214616	0.0149095	0	0	0.000574529	3.23515e-05	0.000759952	7.97947e-05	0.000693519	0.000693519	7.97947e-05	0.0151356	0.000574529	0.000897983	0.0164835	4.20737	0.48409	91.8231	3.48549	5.16633	3.96958	96.0304	95.3085	4.69145
EIO.MW15.X	02	A	0	0.000171062	0	0.000165396	0.0158434	0	0	0.00021615	2.07051e-05	0.000135618	0	0.000603393	0.000603393	0	0.0160384	0.00021615	0.000175182	0.016858	3.57928	0	95.1385	1.28219	1.02848	1.28219	98.7178	96.4207	3.57928
EIO.MW15.X	02	B	0	0.000208338	0	0.000175435	0.0157135	0	0	0.000212662	1.45841e-05	0.000121098	0	0.00069357	0.00069357	0	0.015951	0.000212662	0.000152522	0.0168573	4.11437	0	94.6241	1.26154	0.896672	1.26154	98.7385	95.8856	4.11437
EIO.MW15.X	03	A	0	0.000195488	0	0.000263886	0.0193534	0	0	0.00171078	0	0.00025899	0.000279058	0.000938773	0.000938773	0.000279058	0.0195763	0.00171078	0.000295006	0.0225049	4.17142	1.23999	86.9868	7.6018	1.29389	8.84178	91.1582	94.5886	5.4114
EIO.MW15.X	03	B	0	0.000195088	0	0.000259268	0.0157932	0	0	0.00131897	0	0.00021374	0.000116566	0.000543261	0.000543261	0.000116566	0.0160156	0.00131897	0.000243462	0.0179944	3.01905	0.647793	89.0032	7.3299	1.33493	7.9777	92.0223	96.3332	3.66685
EIO.MW15.X	04	A	0	0.000221646	0	0	0.0316465	0	0	0.000545885	9.29175e-05	0.000202545	0.0001095	0.0013308	0.0013308	0.0001095	0.0318992	0.000545885	0.000323629	0.0338854	3.92737	0.323147	94.1385	1.61098	0.946034	1.93412	98.0659	95.7495	4.25052
EIO.MW15.X	04	B	0	0.000306156	0	0	0.0353445	0	0	0.000633145	5.60574e-05	0.000235214	8.19374e-05	0.00164311	0.00164311	8.19374e-05	0.0356935	0.000633145	0.00032398	0.0380517	4.31809	0.215332	93.8027	1.66391	0.844233	1.87924	98.1208	95.4666	4.53342
EIO.MW15.X	05	A	0	0.000382617	0	0.00011758	0.0369012	0	0	0.00075517	0.000105209	0.000287914	9.29948e-05	0.00136774	0.00136774	9.29948e-05	0.0373373	0.00075517	0.000433161	0.0395532	3.45797	0.235113	94.3977	1.90925	1.08327	2.14436	97.8556	96.3069	3.69309
EIO.MW15.X	05	B	0	0.000416762	0	0.000148453	0.0400862	0	0	0.000823175	0.000137363	0.000360081	8.9553e-05	0.00167308	0.00167308	8.9553e-05	0.0405613	0.000823175	0.000547517	0.0431471	3.87761	0.207553	94.007	1.90783	1.25305	2.11539	97.8846	95.9148	4.08516
EIO.MW15.X	06	A	0	0.000156231	0	0.000108027	0.0160784	0	0	0.000577147	0.000107375	0.000369878	8.20696e-05	0.000739468	0.000739468	8.20696e-05	0.0162565	0.000577147	0.000528688	0.0176552	4.18838	0.464846	92.0778	3.26899	2.90745	3.73384	96.2662	95.3468	4.65323
EIO.MW15.X	06	B	0	0.000108819	0	9.03305e-05	0.0210503	0	0	0.000831988	9.91382e-05	0.000503566	0.00011899	0.00105804	0.00105804	0.00011899	0.0211744	0.000831988	0.000672731	0.0231834	4.56378	0.513256	91.3342	3.58872	2.81995	4.10198	95.898	94.923	5.07704
EIO.MW15.X	07	A	0	7.09267e-05	0	0.000306729	0.0088781	0	0	0.000127664	0	0.000305779	0	0.000434459	0.000434459	0	0.00895895	0.000127664	0.000348301	0.00952107	4.56313	0	94.096	1.34086	3.52911	1.34086	98.6591	95.4369	4.56313
EIO.MW15.X	07	B	0	0.000103081	0	0.000440069	0.0134289	0	0	0.000156243	0	0.000421007	0	0.000703191	0.000703191	0	0.0135464	0.000156243	0.000479553	0.0144059	4.88128	0	94.0341	1.08458	3.22163	1.08458	98.9154	95.1187	4.88128
EIO.MW15.X	08	A	0	0.000102043	0	0.000208021	0.0214422	0	0	0.00145152	0	0.000320249	0.000143077	0.000948831	0.000948831	0.000143077	0.0215585	0.00145152	0.000364784	0.0241019	3.93675	0.593633	89.4472	6.02243	1.49094	6.61607	93.3839	95.4696	4.53038
EIO.MW15.X	08	B	0	0.000105341	0	0.000188173	0.0234617	0	0	0.00153598	0	0.000327861	0.000130505	0.00122366	0.00122366	0.000130505	0.0235818	0.00153598	0.000373454	0.0264719	4.62248	0.492994	89.0822	5.80229	1.39113	6.29528	93.7047	94.8845	5.11547
EIO.MW15.X	09	A	0	9.72262e-05	0	0.000273202	0.0136656	0	0	0.000850011	0.000255364	0.000251162	0.000105332	0.000682658	0.000682658	0.000105332	0.0137765	0.000850011	0.000541453	0.0154145	4.42869	0.683333	89.3736	5.51438	3.39343	6.19771	93.8023	94.888	5.11202
EIO.MW15.X	09	B	0	0.000105581	0	0.000242217	0.0177627	0	0	0.0010962	0.000267462	0.000292646	0.000139398	0.000902187	0.000902187	0.000139398	0.017883	0.0010962	0.000600804	0.0200208	4.50625	0.696264	89.3222	5.47529	2.91346	6.17155	93.8284	94.7975	5.20251
EIO.MW15.X	10	A	0	0.000156248	0	0.00013367	0.0223177	0	0	0.00133689	8.24505e-05	0.000163369	0.00017118	0.00100944	0.00100944	0.00017118	0.0224958	0.00133689	0.000268538	0.0250133	4.03563	0.684354	89.9353	5.3447	1.06218	6.02905	93.971	95.28	4.71998
EIO.MW15.X	10	B	0	9.96629e-05	0	0.000106415	0.02417	0	0	0.0013679	9.67123e-05	0.000165648	0.000225529	0.00109836	0.00109836	0.000225529	0.0242836	0.0013679	0.000285396	0.0269754	4.0717	0.836056	90.0213	5.07091	1.04691	5.90696	94.093	95.0922	4.90776
EIO.MW15.X	19	A	0	0.000177134	0	0.000151978	0.0568349	0	0	0.00345745	0.00217077	0.000847238	0.000405643	0.00256828	0.00256828	0.000405643	0.0570368	0.00345745	0.00313583	0.0634682	4.04657	0.639128	89.8668	5.44753	4.70817	6.08666	93.9133	95.3143	4.6857
EIO.MW15.X	19	B	0	0.000187968	0	0.00012527	0.0562929	0	0	0.00347098	0.00242325	0.000767998	0.000377703	0.00247788	0.00247788	0.000377703	0.0565071	0.00347098	0.00329805	0.0628337	3.94356	0.601115	89.9313	5.52407	4.98709	6.12519	93.8748	95.4553	4.54467
EIO.MW15.X	11	A	0	0	7.28144e-05	0.000253968	0.00494521	0	0	0.000455265	0.000847216	0.000367791	0.00123692	0.00590808	0.00599109	0.00123692	0.00494521	0.000455265	0.00126615	0.0126285	47.441	9.79472	39.1592	3.60506	9.11252	13.3998	86.6002	42.7642	57.2358
EIO.MW15.X	11	B	0	0	8.22481e-05	0.000300149	0.00285337	0	0	0.000347174	0.000250484	0.000369055	0.000842461	0.00420284	0.00429659	0.000842461	0.00285337	0.000347174	0.00067086	0.0083396	51.5204	10.1019	34.2147	4.16296	7.44535	14.2649	85.7351	38.3777	61.6223
EIO.MW17.46	1	A	0	0	0.000367551	0.000105107	0.000193339	0	0	0	0.000140524	0	0.000749491	0.0512755	0.0516945	0.000749491	0.000193339	0	0.000140524	0.0526373	98.2088	1.42388	0.367304	0	0.266256	1.42388	98.5761	0.367304	99.6327
EIO.MW17.46	01	B	0	0	0.000400888	0.000162349	0.000171831	0	0	0	6.95245e-05	0	0.000771655	0.051042	0.051499	0.000771655	0.000171831	0	6.95245e-05	0.0524425	98.2009	1.47143	0.327656	0	0.132397	1.47143	98.5286	0.327656	99.6723
EIO.MW17.46	02	A	0	0	0.000225835	9.30228e-05	0.00020753	0	0	0	0.000538039	0.000281244	0.00110876	0.0637933	0.0640507	0.00110876	0.00020753	0	0.000858393	0.065367	97.9863	1.69621	0.317485	0	1.29617	1.69621	98.3038	0.317485	99.6825
EIO.MW17.46	02	B	0	0	0.000286304	0.000108707	0.000191307	0	0	0	0.000424649	0.000249438	0.00102929	0.0569539	0.0572802	0.00102929	0.000191307	0	0.000708774	0.0585008	97.9135	1.75945	0.327016	0	1.19706	1.75945	98.2405	0.327016	99.673
EIO.MW17.46	03	A	0	0	0.000218977	0	0.000250696	0	0	0	0.00072874	6.80915e-05	0.00108297	0.076325	0.0765747	0.00108297	0.000250696	0	0.0008063	0.0779083	98.2882	1.39006	0.321784	0	1.02433	1.39006	98.6099	0.321784	99.6782
EIO.MW17.46	03	B	0	0	0.000179379	0	0.000172948	0	0	0	0.000337177	6.12071e-05	0.000735837	0.0482645	0.048469	0.000735837	0.000172948	0	0.000406896	0.0493778	98.1595	1.49022	0.350255	0	0.817311	1.49022	98.5098	0.350255	99.6497
EIO.MW17.46	04	A	0	0	0.000251926	0.000143606	0.000143266	0	0	0	0.000334409	0.000276813	0.000528127	0.039306	0.0395932	0.000528127	0.000143266	0	0.000649716	0.0402646	98.3325	1.31164	0.355812	0	1.58799	1.31164	98.6884	0.355812	99.6442
EIO.MW17.46	04	B	0	0	0.000275899	0.000166611	0.00014494	0	0	0	0.000215322	0.000304955	0.000574611	0.0416896	0.0420041	0.000574611	0.00014494	0	0.000562684	0.0427237	98.3158	1.34495	0.339249	0	1.29991	1.34495	98.6551	0.339249	99.6608
EIO.MW17.46	05	A	0	0	0.000207055	0.000135976	0.00010864	0	0	0	6.69764e-05	0.000115255	0.000409306	0.0280273	0.0282633	0.000409306	0.00010864	0	0.000198259	0.0287812	98.2004	1.42213	0.377469	0	0.684135	1.42213	98.5779	0.377469	99.6225
EIO.MW17.46	05	B	0	0	0.000175675	0.000106233	0.000109528	0	0	0	5.27945e-05	0.000133524	0.000386644	0.0267636	0.0269639	0.000386644	0.000109528	0	0.000204886	0.02746	98.1931	1.40802	0.398863	0	0.740599	1.40802	98.592	0.398863	99.6011
EIO.MW17.46	06	A	0	0	0.000184908	0.000108582	0.000150204	0	0	0	0.000328589	0	0.000770237	0.0404746	0.0406854	0.000770237	0.000150204	0	0.000328589	0.0416058	97.7877	1.85127	0.361016	0	0.783577	1.85127	98.1487	0.361016	99.639
EIO.MW17.46	06	B	0	0	0.000205408	0.000125058	0.000139001	0	0	0	9.9943e-05	0	0.000780129	0.041377	0.0416112	0.000780129	0.000139001	0	9.9943e-05	0.0425303	97.8389	1.83429	0.326828	0	0.234441	1.83429	98.1657	0.326828	99.6732
EIO.MW17.46	07	A	0	0	0.000295172	0	0.000270476	0	0	0	0.00030169	0	0.00114025	0.0752839	0.0756204	0.00114025	0.000270476	0	0.00030169	0.0770311	98.1686	1.48025	0.351125	0	0.390119	1.48025	98.5197	0.351125	99.6489
EIO.MW17.46	07	B	0	0	0.000376607	0	0.000197158	0	0	0	0.000186157	0	0.000959776	0.0623326	0.0627619	0.000959776	0.000197158	0	0.000186157	0.0639188	98.19	1.50155	0.30845	0	0.290394	1.50155	98.4984	0.30845	99.6915
EIO.MW17.46	08	A	0	0	0.000370783	0.000162084	0.000196897	0	0	0	6.96845e-05	6.96009e-05	0.000846784	0.0630502	0.0634729	0.000846784	0.000196897	0	0.000148964	0.0645166	98.3823	1.31251	0.305188	0	0.230361	1.31251	98.6875	0.305188	99.6948
EIO.MW17.46	08	B	0	0	0.000444201	0.00019247	0.00022515	0	0	0	0.000101073	7.95193e-05	0.000928469	0.0676448	0.0681512	0.000928469	0.00022515	0	0.00019165	0.0693048	98.3354	1.33969	0.32487	0	0.275769	1.33969	98.6603	0.32487	99.6751
EIO.MW17.46	09	A	0	0	0.00040452	0.000333939	0.000114472	0	0	0	1.95369e-05	0	0.000485467	0.0344208	0.034882	0.000485467	0.000114472	0	1.95369e-05	0.0354819	98.3092	1.36821	0.322622	0	0.0550312	1.36821	98.6318	0.322622	99.6774
EIO.MW17.46	09	B	0	0	0.000343059	0.000268054	0.000101227	0	0	0	4.93023e-05	0	0.00040443	0.0312708	0.0316618	0.00040443	0.000101227	0	4.93023e-05	0.0321675	98.428	1.25726	0.314688	0	0.153033	1.25726	98.7427	0.314688	99.6853
EIO.MW17.46	10	A	0	0	0.000361738	6.67865e-05	0.000300481	0	0	0	0.000844765	0	0.00109244	0.0950973	0.0955096	0.00109244	0.000300481	0	0.000844765	0.0969025	98.5626	1.12736	0.310086	0	0.864234	1.12736	98.8726	0.310086	99.6899
EIO.MW17.46	10	B	0	0	0.000338605	6.57309e-05	0.000266653	0	0	0	0.000263784	0	0.000979204	0.0847617	0.0851477	0.000979204	0.000266653	0	0.000263784	0.0863935	98.5579	1.13342	0.30865	0	0.304399	1.13342	98.8666	0.30865	99.6914
EIO.MW17.49	01	A	0	0	0.000523616	6.29231e-05	0.000170426	0	0	0	7.25231e-05	0	0.000650077	0.0494314	0.0500283	0.000650077	0.000170426	0	7.25231e-05	0.0508488	98.3864	1.27845	0.335163	0	0.142422	1.27845	98.7215	0.335163	99.6648
EIO.MW17.49	01	B	0	0	0.000682923	8.41088e-05	0.000206511	0	0	0	8.01302e-05	0	0.00082107	0.0595598	0.0603382	0.00082107	0.000206511	0	8.01302e-05	0.0613658	98.3255	1.33799	0.336525	0	0.130408	1.33799	98.662	0.336525	99.6635
EIO.MW17.49	02	A	0	0	0.000419753	0	0.000242531	0	0	0	3.96168e-05	0	0.000799242	0.0740965	0.0745749	0.000799242	0.000242531	0	3.96168e-05	0.0756167	98.6223	1.05697	0.320737	0	0.0523642	1.05697	98.943	0.320737	99.6793
EIO.MW17.49	02	B	0	0	0.000471993	0	0.000255813	0	0	0	3.58571e-05	0	0.000876712	0.0785792	0.0791172	0.000876712	0.000255813	0	3.58571e-05	0.0802497	98.5887	1.09248	0.318771	0	0.0446619	1.09248	98.9075	0.318771	99.6812
EIO.MW17.49	03	A	0	0	0.000403147	0	0.000262176	0	0	0	9.43732e-05	9.75165e-05	0.000807748	0.078799	0.0792586	0.000807748	0.000262176	0	0.00020545	0.0803285	98.6681	1.00556	0.32638	0	0.25511	1.00556	98.9944	0.32638	99.6736
EIO.MW17.49	03	B	0	0	0.000460285	0	0.000261693	0	0	0	8.95293e-05	0.000107704	0.000807548	0.0799485	0.0804732	0.000807548	0.000261693	0	0.000212211	0.0815424	98.6887	0.990341	0.320929	0	0.25957	0.990341	99.0097	0.320929	99.6791
EIO.MW17.49	04	A	0	0	0.000312065	0	0.000199668	0	0	0	3.64546e-05	0	0.000635059	0.0589426	0.0592983	0.000635059	0.000199668	0	3.64546e-05	0.060133	98.6119	1.05609	0.332043	0	0.0605866	1.05609	98.9439	0.332043	99.668
EIO.MW17.49	04	B	0	0	0.000315669	0	0.000166856	0	0	0	3.53121e-05	0	0.000583395	0.0528017	0.0531615	0.000583395	0.000166856	0	3.53121e-05	0.0539117	98.6084	1.08213	0.309498	0	0.0654569	1.08213	98.9179	0.309498	99.6905
EIO.MW17.49	05	A	0	0	0.000842944	0	0.000295602	0	0	0	9.8902e-05	0	0.00180068	0.0883328	0.0892937	0.00180068	0.000295602	0	9.8902e-05	0.09139	97.7062	1.97033	0.323451	0	0.108103	1.97033	98.0297	0.323451	99.6765
EIO.MW17.49	05	B	0	0	0.000683068	0	0.000266416	0	0	0	0.000104696	0	0.00159579	0.0760016	0.0767802	0.00159579	0.000266416	0	0.000104696	0.0786424	97.6321	2.02918	0.338769	0	0.132952	2.02918	97.9708	0.338769	99.6612
EIO.MW17.49	06	A	0	0	0.000364643	6.4608e-05	0.000174773	0	0	0	6.71224e-05	8.91074e-05	0.000633536	0.0489412	0.0493569	0.000633536	0.000174773	0	0.000168621	0.0501652	98.3887	1.2629	0.348395	0	0.335006	1.2629	98.7371	0.348395	99.6516
EIO.MW17.49	06	B	0	0	0.000379284	7.75441e-05	0.000183862	0	0	0	5.93091e-05	8.56012e-05	0.000608607	0.0470155	0.0474478	0.000608607	0.000183862	0	0.000156814	0.0482403	98.3572	1.26162	0.381137	0	0.324015	1.26162	98.7384	0.381137	99.6189
EIO.MW17.49	07	A	0	0	0.000378583	0.000109986	0.000144684	0	0	0	5.36807e-05	0.000105806	0.000734558	0.0351507	0.0355823	0.000734558	0.000144684	0	0.0001742	0.0364615	97.5886	2.01461	0.396812	0	0.475493	2.01461	97.9854	0.396812	99.6032
EIO.MW17.49	07	B	0	0	0.000358989	0.000109939	0.000123653	0	0	0	3.61847e-05	8.70825e-05	0.000662436	0.0291676	0.0295768	0.000662436	0.000123653	0	0.000135377	0.0303629	97.411	2.18172	0.407249	0	0.443884	2.18172	97.8183	0.407249	99.5928
EIO.MW17.49	08	A	0	0	0.000227374	0	0.000146945	0	0	0	6.03292e-05	0.000106028	0.000824104	0.0413711	0.0416303	0.000824104	0.000146945	0	0.000181101	0.0426013	97.7206	1.93446	0.34493	0	0.423308	1.93446	98.0655	0.34493	99.6551
EIO.MW17.49	08	B	0	0	0.000190043	0	0.00014531	0	0	0	5.66666e-05	8.47785e-05	0.000644128	0.0330813	0.0332979	0.000644128	0.00014531	0	0.000153234	0.0340873	97.6841	1.88964	0.426288	0	0.447523	1.88964	98.1104	0.426288	99.5737
EIO.MW17.49	09	A	0	0	0.000390767	0	0.000170444	0	0	0	5.66974e-05	7.7611e-05	0.00102444	0.0486832	0.0491287	0.00102444	0.000170444	0	0.000145101	0.0503236	97.6256	2.03571	0.338697	0	0.287507	2.03571	97.9643	0.338697	99.6613
EIO.MW17.49	09	B	0	0	0.000344015	0	0.000180366	0	0	0	7.52574e-05	7.04312e-05	0.00101473	0.0482569	0.0486491	0.00101473	0.000180366	0	0.000155483	0.0498442	97.6023	2.0358	0.36186	0	0.310968	2.0358	97.9642	0.36186	99.6381
EIO.MW17.49	10	A	0	0	0.00067806	0.000130778	0.000158141	0	0	0	6.72711e-05	0.00016632	0.000910017	0.0421114	0.0428843	0.000910017	0.000158141	0	0.00025672	0.0439525	97.5697	2.07046	0.359801	0	0.580693	2.07046	97.9295	0.359801	99.6402
EIO.MW17.49	10	B	0	0	0.000544319	0.000111099	0.000130947	0	0	0	4.69628e-05	0.000138112	0.000788443	0.0323374	0.0329578	0.000788443	0.000130947	0	0.000204281	0.0338772	97.2861	2.32735	0.386534	0	0.599388	2.32735	97.6726	0.386534	99.6135
EIO.MW17.03	01	A	0	0.000173572	0	0.000204903	0.0220901	0	0	0.00122288	0.000126716	9.17222e-05	0.000157706	0.00113073	0.00113073	0.000157706	0.022288	0.00122288	0.000231193	0.0247993	4.55951	0.63593	89.8734	4.93112	0.923647	5.56705	94.433	94.8046	5.19544
EIO.MW17.03	01	B	0	0.000167661	0	0.000198706	0.0210343	0	0	0.00137246	0.000129963	0.000101347	0.000149355	0.00108028	0.00108028	0.000149355	0.0212255	0.00137246	0.000245404	0.0238276	4.53376	0.626816	89.0794	5.75998	1.01942	6.3868	93.6132	94.8394	5.16057
EIO.MW17.03	02	A	0	6.76797e-05	7.97511e-05	0	0.0151319	0	0	0.000524064	0.000126303	0	0.00066225	0.00828912	0.00838003	0.00066225	0.0152091	0.000524064	0.000126303	0.0247754	33.824	2.67301	61.3878	2.11526	0.507207	4.78827	95.2117	63.503	36.497
EIO.MW17.03	02	B	0	7.06483e-05	9.1076e-05	0	0.0179836	0	0	0.000678037	0.000202729	0	0.000876626	0.0105827	0.0106865	0.000876626	0.0180642	0.000678037	0.000202729	0.0303053	35.2629	2.89264	59.6072	2.23735	0.66451	5.13	94.87	61.8445	38.1555
EIO.MW17.03	03	A	0	0	0.000266777	0.000518137	7.85531e-05	0	0	3.00195e-05	0.000714014	0.000241709	0.000980176	0.0178713	0.0181754	0.000980176	7.85531e-05	3.00195e-05	0.000989335	0.0192642	94.3483	5.08808	0.407768	0.155831	4.88476	5.24391	94.7561	0.563599	99.4364
EIO.MW17.03	03	B	0	0	0.000417024	0.000916712	4.99517e-05	0	0	3.07057e-05	0.000581906	0.000226998	0.000705358	0.0147595	0.0152349	0.000705358	4.99517e-05	3.07057e-05	0.000840471	0.0160209	95.0938	4.40275	0.311792	0.19166	4.9846	4.59441	95.4056	0.503452	99.4965
EIO.MW17.03	04	A	0	0	0.000132136	0.000833546	0.00914317	0	0	0.00017183	4.89997e-05	0.00019786	0.000278726	0.00647008	0.0066207	0.000278726	0.00914317	0.00017183	0.000274374	0.0162144	40.8322	1.719	56.3891	1.05973	1.664	2.77874	97.2213	57.4488	42.5512
EIO.MW17.03	04	B	0	0	0.0001084	0.000437493	0.00883015	0	0	0.000167437	6.23122e-05	0.000159954	0.00024728	0.00614341	0.00626697	0.00024728	0.00883015	0.000167437	0.00024451	0.0155118	40.4012	1.59414	56.9252	1.07941	1.55182	2.67355	97.3264	58.0047	41.9953
EIO.MW17.03	05	A	0	8.05776e-05	0.000128485	0.000234249	0.00994043	0	0	0.000160223	3.26568e-05	0.000484552	0.000288795	0.00848449	0.00863095	0.000288795	0.0100323	0.000160223	0.000584591	0.0191123	45.1592	1.51105	52.4914	0.838327	2.96794	2.34937	97.6506	53.3297	46.6703
EIO.MW17.03	05	B	0	7.30384e-05	0.000123972	0.00021431	0.00869369	0	0	0.000129295	3.19835e-05	0.000444886	0.00023913	0.00764354	0.00778485	0.00023913	0.00877695	0.000129295	0.000538736	0.0169302	45.982	1.41245	51.8419	0.763694	3.08396	2.17614	97.8239	52.6056	47.3944
EIO.MW17.03	06	A	0	0	7.50859e-05	0.000177516	0.0127715	0	0	0.000854884	0.000278437	0	0.0010128	0.00756254	0.00764813	0.0010128	0.0127715	0.000854884	0.000278437	0.0222873	34.3161	4.54431	57.3038	3.83575	1.23389	8.38006	91.6199	61.1396	38.8604
EIO.MW17.03	06	B	0	0	7.8301e-05	0.000106523	0.0122972	0	0	0.000744761	0.000249598	0	0.000969125	0.0074418	0.00753105	0.000969125	0.0122972	0.000744761	0.000249598	0.0215421	34.9597	4.49875	57.0843	3.45724	1.14538	7.95599	92.044	60.5415	39.4585
EIO.MW17.03	07	A	0	0	0.000140398	0.000303086	0.0061843	0	0	4.75082e-05	3.11197e-05	0.000109855	9.03438e-05	0.00593236	0.0060924	9.03438e-05	0.0061843	4.75082e-05	0.000156251	0.0124146	49.0747	0.727725	49.8149	0.382682	1.24297	1.11041	98.8896	50.1976	49.8024
EIO.MW17.03	07	B	0	0	0.000130409	0.000292337	0.00900568	0	0	7.43129e-05	5.44526e-05	0.000135018	9.4137e-05	0.00734964	0.0074983	9.4137e-05	0.00900568	7.43129e-05	0.000208246	0.0166724	44.9742	0.564627	54.0154	0.445724	1.23364	1.01035	98.9896	54.4611	45.5389
EIO.MW17.03	08	A	0	0.000141715	0.000134837	0.000332426	0.0159042	0	0	0.000153025	9.42634e-05	0.000150515	9.6906e-05	0.00617041	0.00632412	9.6906e-05	0.0160657	0.000153025	0.000265709	0.0226398	27.9336	0.428034	70.9624	0.675914	1.16002	1.10395	98.8961	71.6383	28.3617
EIO.MW17.03	08	B	0	0.000125892	0.000102095	0.000214892	0.0172828	0	0	0.00014731	7.73083e-05	0.000162833	0.000129406	0.00692591	0.00704229	0.000129406	0.0174263	0.00014731	0.000262785	0.0247453	28.4591	0.522952	70.4227	0.595306	1.0508	1.11826	98.8817	71.018	28.982
EIO.MW17.03	09	A	0	0	0.000108007	0.000206886	0.00758535	0	0	0.000110511	3.5021e-05	7.1832e-05	0.000178877	0.00600205	0.00612517	0.000178877	0.00758535	0.000110511	0.000116842	0.0139999	43.7515	1.2777	54.1814	0.789372	0.827683	2.06708	97.9329	54.9708	45.0292
EIO.MW17.03	09	B	0	0	7.73991e-05	0.000233214	0.0084196	0	0	0.000134764	7.13909e-05	9.14594e-05	0.000176185	0.0057504	0.00583862	0.000176185	0.0084196	0.000134764	0.000175569	0.0145692	40.0752	1.2093	57.7905	0.924992	1.19072	2.13429	97.8657	58.7155	41.2845
EIO.MW17.23	01	A	0	0	0.000136332	9.31622e-05	8.14698e-05	0.000126127	0	3.56802e-05	7.75823e-05	0.000248029	0.00335016	0.0211449	0.0213003	0.00349566	8.14698e-05	3.56802e-05	0.000360103	0.0249131	85.4983	14.0314	0.327016	0.143219	1.42484	14.1746	85.8254	0.470235	99.5298
EIO.MW17.23	01	B	0	0	0.000179462	9.76717e-05	0.000109257	0.000117848	0	4.57812e-05	8.03525e-05	0.000314167	0.00426368	0.0290949	0.0292995	0.00439963	0.000109257	4.57812e-05	0.000438208	0.0338542	86.5462	12.9958	0.32273	0.13523	1.27786	13.1311	86.8689	0.45796	99.542
EIO.MW17.23	02	A	0	0	8.57063e-05	0	0.000140694	0	0	6.17304e-05	0	0.000154063	0.0009463	0.0202613	0.020359	0.0009463	0.000140694	6.17304e-05	0.000175487	0.0215077	94.659	4.39982	0.654158	0.287015	0.809325	4.68683	95.3132	0.941173	99.0588
EIO.MW17.23	02	B	0	0	0.000138276	0	9.41336e-05	0	0	3.55868e-05	0	0.000150396	0.000454483	0.0118781	0.0120357	0.000454483	9.41336e-05	3.55868e-05	0.000171311	0.0126199	95.3708	3.60132	0.745915	0.28199	1.33929	3.88331	96.1167	1.0279	98.9721
EIO.MW17.23	03	A	0	0.000179199	0.000159239	0	0.0304625	0	0	0.00109097	0.00030663	0.000150976	0.00143844	0.0195173	0.0196988	0.00143844	0.0306668	0.00109097	0.000478601	0.0528951	37.2414	2.71942	57.9767	2.06252	0.896699	4.78194	95.2181	60.0392	39.9608
EIO.MW17.23	03	B	0	0.000182929	0.000144269	0	0.0302559	0	0	0.00113355	0.000347266	0.000141976	0.00145763	0.0199845	0.020149	0.00145763	0.0304644	0.00113355	0.000508985	0.0532046	37.8708	2.73967	57.259	2.13055	0.947591	4.87022	95.1298	59.3895	40.6105
EIO.MW17.23	04	A	0	0	0	0.000182549	0.0095842	0	0	0.000812854	2.11507e-05	0.000171126	0.00129066	0.00682295	0.00682295	0.00129066	0.0095842	0.000812854	0.000216073	0.0185107	36.8596	6.9725	51.7767	4.39127	1.15382	11.3638	88.6362	56.1679	43.8321
EIO.MW17.23	04	B	0	0	0	0.000175982	0.00930817	0	0	0.000877261	4.01892e-05	0.000188572	0.00106737	0.00641547	0.00641547	0.00106737	0.00930817	0.000877261	0.000254985	0.0176683	36.3107	6.04119	52.683	4.96518	1.42265	11.0064	88.9936	57.6481	42.3519
EIO.MW17.23	05	A	0	0.000155923	0.000163973	0.00015532	0.0264689	0.00011985	0	0.00358906	0.000593247	0.000241907	0.00447345	0.0173965	0.0175834	0.00461171	0.0266467	0.00358906	0.000868794	0.0524308	33.5364	8.7958	50.8225	6.84532	1.63002	15.6411	84.3589	57.6678	42.3322
EIO.MW17.23	05	B	0	0.000152181	0.000114249	0.000105088	0.0254711	0.000105858	0	0.00327155	0.000116386	0.00021338	0.00405685	0.0157353	0.0158656	0.00417897	0.0256446	0.00327155	0.000359439	0.0489607	32.4047	8.53536	52.3779	6.68199	0.728787	15.2174	84.7826	59.0599	40.9401
EIO.MW17.23	06	A	0	0.000113705	8.05705e-05	7.63355e-05	0.026187	0	0	0.0027302	0.000269969	0.000157632	0.00379732	0.0185762	0.018668	0.00379732	0.0263166	0.0027302	0.000449521	0.0515122	36.24	7.37169	51.0882	5.3001	0.8651	12.6718	87.3282	56.3883	43.6117
EIO.MW17.23	06	B	0	8.35633e-05	7.02681e-05	7.50077e-05	0.0267209	0	0	0.00259976	9.08029e-05	0.000148048	0.00344659	0.0160981	0.0161782	0.00344659	0.0268161	0.00259976	0.000259439	0.0490406	32.9893	7.02804	54.6814	5.30123	0.526245	12.3293	87.6707	59.9827	40.0173
EIO.MW17.23	07	A	0	0.000127192	0.000108442	0	0.0212002	0.000132074	0	0.00299532	0.000324124	0.000121334	0.0035704	0.013135	0.0132586	0.00372276	0.0213452	0.00299532	0.000462331	0.0413219	32.0861	9.00917	51.656	7.24875	1.10647	16.2579	83.7421	58.9047	41.0953
EIO.MW17.23	07	B	0	8.88427e-05	7.91828e-05	0	0.0224828	0.000120907	0	0.00309152	0.000398603	0.000126185	0.0039274	0.0140266	0.0141169	0.00406688	0.0225841	0.00309152	0.000542335	0.0438594	32.1867	9.27255	51.492	7.04872	1.22143	16.3213	83.6787	58.5408	41.4592
EIO.MW17.23	08	A	0	0	5.57139e-05	0	0.0093483	0	0	0.000279773	3.23857e-05	0.000125618	0.000515319	0.00770457	0.00776808	0.000515319	0.0093483	0.000279773	0.000175472	0.0179115	43.3693	2.87703	52.1917	1.56197	0.97016	4.43901	95.561	53.7537	46.2463
EIO.MW17.23	08	B	0	0	8.20639e-05	0	0.00933548	0	0	0.00025099	3.99263e-05	0.000136096	0.000467946	0.00796071	0.00805426	0.000467946	0.00933548	0.00025099	0.000194947	0.0181087	44.4774	2.5841	51.5525	1.38602	1.06508	3.97012	96.0299	52.9386	47.0614
EIO.MW17.23	09	A	0	0	8.18818e-05	8.67246e-05	8.18743e-05	0.000100781	0	7.77811e-05	9.192e-05	0.000363816	0.00365525	0.0181571	0.0182504	0.00377151	8.18743e-05	7.77811e-05	0.000506328	0.0221816	82.2773	17.0029	0.369109	0.350656	2.23171	17.3536	82.6464	0.719765	99.2802
EIO.MW17.23	09	B	0	0	9.41091e-05	7.53886e-05	9.16681e-05	9.68734e-05	0	6.34555e-05	3.15499e-05	0.000411577	0.00493164	0.0242154	0.0243227	0.00504339	9.16681e-05	6.34555e-05	0.000500362	0.0295212	82.3906	17.0839	0.310516	0.214949	1.66667	17.2989	82.7011	0.525465	99.4745
EIO.MW17.23	10	A	0	0	5.34687e-05	7.78506e-05	0.0113752	0	0	0.001213	4.13037e-05	0.000196839	0.0014777	0.00750717	0.00756812	0.0014777	0.0113752	0.001213	0.000265516	0.021634	34.9825	6.83047	52.5801	5.60691	1.21243	12.4374	87.5626	58.187	41.813
EIO.MW17.23	10	B	0	0	6.83507e-05	9.02276e-05	0.015976	0	0	0.00171108	4.027e-05	0.000214871	0.00243582	0.0111662	0.0112441	0.00243582	0.015976	0.00171108	0.000285021	0.0313671	35.847	7.76554	50.9325	5.45503	0.900481	13.2206	86.7794	56.3875	43.6125
EIO.MW15.27	01	A	0	0	0.000172141	0.000141867	6.64564e-05	0.000291761	0	0.00013496	3.73606e-05	0.000108605	0.0130288	0.0139053	0.0141015	0.0133653	6.64564e-05	0.00013496	0.000161068	0.0276683	50.9664	48.3056	0.24019	0.487777	0.578771	48.7934	51.2066	0.727967	99.272
EIO.MW15.27	01	B	0	0	0.000211289	0.000234508	7.27978e-05	0.000290105	0	0.000176386	1.52555e-05	0.000134657	0.0167751	0.0177271	0.0179679	0.0171098	7.27978e-05	0.000176386	0.000168638	0.0353269	50.8619	48.4327	0.206069	0.499297	0.475098	48.932	51.068	0.705366	99.2946
EIO.MW15.27	02	A	0	0	0.000111321	0	5.27156e-05	0.000307869	0	0.000114547	1.59447e-05	0	0.0153756	0.0080191	0.008146	0.0157307	5.27156e-05	0.000114547	1.59447e-05	0.024044	33.8796	65.4248	0.219247	0.476406	0.0662709	65.9012	34.0988	0.695653	99.3043
EIO.MW15.27	02	B	0	0	0.000125468	0	6.04966e-05	0.000317588	0	0.000112657	2.49379e-05	0	0.0171955	0.00762662	0.00776964	0.0175619	6.04966e-05	0.000112657	2.49379e-05	0.0255047	30.4636	68.8575	0.237198	0.44171	0.0976821	69.2992	30.7008	0.678908	99.3211
EIO.MW15.27	03	A	0	0	0.000220074	0	0.000147905	0.000269677	0	0.000195917	4.13564e-05	0.000170122	0.0347956	0.0423323	0.0425831	0.0351067	0.000147905	0.000195917	0.000235135	0.0780337	54.5702	44.9892	0.189541	0.251068	0.30042	45.2402	54.7598	0.440608	99.5594
EIO.MW15.27	03	B	0	0	0.000244273	0	0.000159975	0.000312048	0	0.000200431	6.20035e-05	0.000187853	0.0390586	0.0477035	0.047982	0.0394186	0.000159975	0.000200431	0.00027598	0.087761	54.6735	44.9159	0.182285	0.228383	0.313482	45.1443	54.8557	0.410668	99.5893
EIO.MW15.27	04	A	0	0	7.95885e-05	0	4.1874e-05	0.000350855	0	0.000179254	2.57535e-05	6.22787e-05	0.033231	0.00698928	0.00708001	0.0336358	4.1874e-05	0.000179254	9.66928e-05	0.0409369	17.2949	82.1649	0.102289	0.437878	0.235643	82.6028	17.3972	0.540167	99.4598
EIO.MW15.27	04	B	0	0	7.41744e-05	0	4.98932e-05	0.000430002	0	0.000180274	1.85292e-05	8.61056e-05	0.0308541	0.00787107	0.00795562	0.0313502	4.98932e-05	0.000180274	0.000116609	0.039536	20.1225	79.2953	0.126197	0.455975	0.294076	79.7513	20.2487	0.582172	99.4178
EIO.MW15.27	05	A	0	0	9.03301e-05	0	4.43432e-05	0.000555838	0	0.000247286	0	0	0.0452769	0.00688639	0.00698936	0.0459181	4.43432e-05	0.000247286	0	0.0531991	13.1381	86.3137	0.0833532	0.464831	0	86.7785	13.2215	0.548185	99.4518
EIO.MW15.27	05	B	0	0	8.25668e-05	0	3.9028e-05	0.000464055	0	0.000179339	0	0	0.0355766	0.00618094	0.00627506	0.0361119	3.9028e-05	0.000179339	0	0.0426054	14.7283	84.7591	0.0916035	0.42093	0	85.1801	14.8199	0.512533	99.4875
EIO.MW15.27	06	A	0	0	0.000191462	7.92373e-05	0.000107093	0.000271849	0	0.000137628	4.17854e-05	7.52495e-05	0.0209962	0.0228196	0.0230378	0.0213098	0.000107093	0.000137628	0.000127499	0.0445923	51.6632	47.788	0.240161	0.308637	0.285107	48.0966	51.9034	0.548797	99.4512
EIO.MW15.27	06	B	0	0	0.000229908	9.21842e-05	0.000105044	0.000289194	0	0.000129829	4.20977e-05	6.92563e-05	0.0209153	0.0276044	0.0278664	0.021249	0.000105044	0.000129829	0.000120985	0.0493503	56.4667	43.0574	0.212855	0.263077	0.244556	43.3205	56.6795	0.475931	99.5241
EIO.MW15.27	07	A	0	0	0.000118185	0.00010122	3.96399e-05	0.00025029	0	0.000120661	0	7.69132e-05	0.0123552	0.00730493	0.00743965	0.012644	3.96399e-05	0.000120661	8.76088e-05	0.0202439	36.7501	62.4581	0.195812	0.596034	0.430902	63.0541	36.9459	0.791846	99.2082
EIO.MW15.27	07	B	0	0	0.000108329	7.32152e-05	3.74346e-05	0.000255366	0	0.000118895	0	5.90311e-05	0.0133159	0.00826882	0.00839231	0.0136105	3.74346e-05	0.000118895	6.724e-05	0.0221592	37.8728	61.4217	0.168935	0.536549	0.302523	61.9582	38.0418	0.705484	99.2945
EIO.MW15.27	08	A	0	0	0	0.000144734	6.63302e-05	0.000195348	0	0.000112091	0	9.1904e-05	0.0145439	0.0176253	0.0176253	0.0147693	6.63302e-05	0.000112091	0.000104684	0.032573	54.1101	45.3421	0.203636	0.344122	0.320354	45.6863	54.3137	0.547758	99.4522
EIO.MW15.27	08	B	0	0	0	0.000155339	9.07802e-05	0.000218873	0	0.00012619	0	9.34478e-05	0.0196077	0.0234172	0.0234172	0.0198602	9.07802e-05	0.00012619	0.000106443	0.0434944	53.8396	45.6615	0.208717	0.290128	0.24413	45.9517	54.0483	0.498845	99.5012
EIO.MW15.27	09	A	0	0	0.000189155	0.000184135	7.42706e-05	0.000345884	0	0.000179782	1.83987e-05	0.000137455	0.0188007	0.0146839	0.0148995	0.0191997	7.42706e-05	0.000179782	0.000174968	0.0343532	43.3714	55.889	0.216197	0.523335	0.50674	56.4124	43.5876	0.739532	99.2605
EIO.MW15.27	09	B	0	0	0.00022853	0.000255911	9.13994e-05	0.000383359	0	0.000216983	3.94165e-05	0.000198506	0.0214755	0.0189785	0.019239	0.0219178	9.13994e-05	0.000216983	0.000265527	0.0414652	46.398	52.8582	0.220424	0.523289	0.636285	53.3815	46.6185	0.743713	99.2563
EIO.MW15.27	10	A	0	0	0.000213931	0	7.08639e-05	0.000151639	0	5.42993e-05	2.91627e-05	9.1345e-05	0.00462405	0.0194112	0.0196551	0.00479899	7.08639e-05	5.42993e-05	0.00013321	0.0245793	79.9662	19.5245	0.288308	0.220915	0.53904	19.7455	80.2545	0.509223	99.4908
EIO.MW15.27	10	B	0	0	0.000138748	0	5.69442e-05	0.000143358	0	3.6929e-05	2.10095e-05	0.000100187	0.0031455	0.0131523	0.0133105	0.00331088	5.69442e-05	3.6929e-05	0.000135129	0.0167152	79.6308	19.8076	0.340673	0.22093	0.801935	20.0285	79.9715	0.561603	99.4384
EIO.MW17.30	01	A	0	0.000128599	0	0.000144788	0.0251974	0	0	0.000229304	0.000172737	0.000159386	0	0.00104203	0.00104203	0	0.0253439	0.000229304	0.000354288	0.0266153	3.91514	0	95.2233	0.86155	1.31366	0.86155	99.1385	96.0849	3.91514
EIO.MW17.30	01	B	0	0.000104564	0	0.000371519	0.022977	0	0	0.000204847	9.66376e-05	0.000172161	0	0.00108239	0.00108239	0	0.0230962	0.000204847	0.000292739	0.0243835	4.43901	0	94.7209	0.840107	1.18632	0.840107	99.1599	95.561	4.43901
EIO.MW17.30	02	A	0	0	0.000118689	6.90162e-05	0.000163656	0	0	0	1.45776e-05	0.000236308	0.000415746	0.0194454	0.0195807	0.000415746	0.000163656	0	0.000283747	0.0201601	97.126	2.06222	0.811782	0	1.38793	2.06222	97.9378	0.811782	99.1882
EIO.MW17.30	02	B	0	0	0.000138644	9.06741e-05	0.000127459	0	0	0	1.2209e-05	0.000253919	0.000577365	0.0263993	0.0265573	0.000577365	0.000127459	0	0.000301438	0.0272621	97.4146	2.11783	0.467531	0	1.09361	2.11783	97.8822	0.467531	99.5325
EIO.MW17.30	03	A	0	7.52768e-05	6.17609e-05	8.03398e-05	0.0147466	0	0	0.000176286	0.000231231	0.000173652	0.00029359	0.0122955	0.0123659	0.00029359	0.0148324	0.000176286	0.000429031	0.0276682	44.6937	1.06111	53.6081	0.637144	1.52695	1.69826	98.3017	54.2452	45.7548
EIO.MW17.30	03	B	0	6.96522e-05	7.09905e-05	0.000101372	0.0132607	0	0	0.000164621	0.000153243	0.000182301	0.00037615	0.0105212	0.0106021	0.00037615	0.0133401	0.000164621	0.000360895	0.0244829	43.304	1.53638	54.4872	0.672391	1.45266	2.20877	97.7912	55.1596	44.8404
EIO.MW17.30	04	A	0	0	0	0.000131994	0.00837389	0	0	0.000121745	5.56863e-05	0.000126073	0.000104406	0.00402768	0.00402768	0.000104406	0.00837389	0.000121745	0.000199291	0.0126277	31.8955	0.826798	66.3136	0.964107	1.55368	1.79091	98.2091	67.2777	32.7223
EIO.MW17.30	04	B	0	0	0	0.000118544	0.00807145	0	0	0.000114657	7.33505e-05	0.000119326	0.000197364	0.00422725	0.00422725	0.000197364	0.00807145	0.000114657	0.00020927	0.0126107	33.5211	1.56505	64.0047	0.909206	1.63237	2.47426	97.5257	64.9139	35.0861
EIO.MW17.30	05	A	0	5.00155e-05	3.29646e-05	0	0.00832274	0	0	7.03097e-05	9.74658e-05	3.57569e-05	0.000107829	0.0066984	0.00673598	0.000107829	0.00837976	7.03097e-05	0.000138195	0.0152939	44.0436	0.705045	54.7916	0.459725	0.895506	1.16477	98.8352	55.2513	44.7487
EIO.MW17.30	05	B	0	0.000122	8.87138e-05	0	0.0208534	0	0	0.000176447	0.000135687	9.76206e-05	0.00033523	0.0165297	0.0166309	0.00033523	0.0209925	0.000176447	0.000246883	0.038135	43.6104	0.879059	55.0478	0.462689	0.643228	1.34175	98.6583	55.5105	44.4895
EIO.MW17.30	06	A	0	9.83614e-05	0	0.000228986	0.0164756	0	0	0.000222054	0.000150055	0.000230378	0	0.000819168	0.000819168	0	0.0165877	0.000222054	0.000412469	0.0176289	4.64673	0	94.0937	1.2596	2.28624	1.2596	98.7404	95.3533	4.64673
EIO.MW17.30	06	B	0	0.00013249	0	0.000310607	0.0190104	0	0	0.000251893	0.000107921	0.00028951	0	0.000996402	0.000996402	0	0.0191614	0.000251893	0.000437691	0.0204097	4.88199	0	93.8838	1.23418	2.0995	1.23418	98.7658	95.118	4.88199
EIO.MW17.30	07	A	0	8.69477e-05	6.73202e-05	0	0.0157621	0	0	0.000146017	7.97178e-05	0.000148272	0.00042075	0.0126994	0.0127761	0.00042075	0.0158612	0.000146017	0.000248609	0.0292041	43.7476	1.44072	54.3117	0.499987	0.844094	1.94071	98.0593	54.8117	45.1883
EIO.MW17.30	07	B	0	8.81646e-05	7.09162e-05	0	0.0149868	0	0	0.000133637	9.14602e-05	0.000148903	0.000367218	0.0131539	0.0132347	0.000367218	0.0150873	0.000133637	0.000261069	0.0288228	45.9174	1.27405	52.3449	0.463649	0.897642	1.7377	98.2623	52.8085	47.1915
EIO.MW17.30	08	A	0	0.000160219	0	0.000190642	0.0307229	0	0	0.000256398	0.00039454	0.00032776	0	0.00156408	0.00156408	0	0.0309056	0.000256398	0.000767879	0.032726	4.77932	0	94.4372	0.783468	2.29259	0.783468	99.2165	95.2207	4.77932
EIO.MW17.30	08	B	0	0.000189177	0	0.000169362	0.0334135	0	0	0.00027654	0.000497212	0.000340605	0	0.00169748	0.00169748	0	0.0336291	0.00027654	0.000885181	0.0356031	4.76779	0	94.4555	0.776728	2.42593	0.776728	99.2233	95.2322	4.76779
EIO.MW17.30	09	A	0	0	0	0.000121548	0.0203256	0	0	0.000212197	0.00155752	0.000253223	0.000203391	0.00740636	0.00740636	0.000203391	0.0203256	0.000212197	0.00184595	0.0281476	26.3126	0.722588	72.2109	0.753874	6.15451	1.47646	98.5235	72.9648	27.0352
EIO.MW17.30	09	B	0	0	0	0.000131628	0.0151226	0	0	0.000158112	0.0010984	0.000214523	0.000161247	0.00567097	0.00567097	0.000161247	0.0151226	0.000158112	0.00134276	0.0211129	26.8602	0.763737	71.6271	0.748887	5.9796	1.51262	98.4874	72.376	27.624
EIO.MW17.30	10	A	0	0	5.98306e-05	0.000107922	0.0180176	0	0	0.00017129	0.00149729	0.000268788	0.000236581	0.0121982	0.0122664	0.000236581	0.0180176	0.00017129	0.00180346	0.030692	39.9663	0.770823	58.7048	0.558094	5.54989	1.32892	98.6711	59.2629	40.7371
EIO.MW17.30	10	B	0	0	6.19348e-05	0.000110051	0.0159235	0	0	0.000163097	0.00113897	0.000245743	0.000239607	0.0112339	0.0113045	0.000239607	0.0159235	0.000163097	0.00141888	0.0276307	40.9128	0.867176	57.6297	0.590275	4.88435	1.45745	98.5425	58.22	41.78
EIO.MW17.16	01	A	0	0	8.39278e-05	0.000101372	0.000137061	0.000121177	0	5.47368e-05	0.00706757	0.000181076	0.00449365	0.0290265	0.0291222	0.00463344	0.000137061	5.47368e-05	0.00727382	0.0339475	85.7862	13.6489	0.403746	0.16124	17.6458	13.8101	86.1899	0.564986	99.435
EIO.MW17.16	01	B	0	0	9.29552e-05	0.000110872	0.000123673	0.000137439	0	5.64111e-05	0.00678796	0.000187025	0.00420475	0.0276866	0.0277925	0.0043633	0.000123673	5.64111e-05	0.00700099	0.0323359	85.9494	13.4937	0.382462	0.174453	17.7975	13.6681	86.3319	0.556915	99.4431
EIO.MW17.16	02	A	0	0	5.75003e-05	0	7.73311e-05	0	0	4.56926e-05	0.000975109	0.000215738	0.00262078	0.0233234	0.023389	0.00262078	7.73311e-05	4.56926e-05	0.00122085	0.0261328	89.5005	10.0287	0.295916	0.174848	4.4632	10.2035	89.7965	0.470764	99.5292
EIO.MW17.16	02	B	0	0	6.59278e-05	0	7.6624e-05	0	0	3.44694e-05	0.00128034	0.000184685	0.00254139	0.0224871	0.0225622	0.00254139	7.6624e-05	3.44694e-05	0.00149071	0.0252147	89.4804	10.079	0.303886	0.136703	5.58204	10.2157	89.7843	0.44059	99.5594
EIO.MW17.16	03	A	0	0	8.42626e-05	0.000157136	5.55082e-05	0.000106258	0	3.95185e-05	0.000851049	9.03425e-05	0.00194357	0.0140814	0.0141774	0.00206615	5.55082e-05	3.95185e-05	0.000953955	0.0163386	86.7726	12.6458	0.339737	0.241872	5.51657	12.8877	87.1123	0.581609	99.4184
EIO.MW17.16	03	B	0	0	0.000107117	0.000188474	3.17418e-05	0.000137484	0	3.13343e-05	0.000663109	5.95467e-05	0.00151709	0.0109069	0.011029	0.00167569	3.17418e-05	3.13343e-05	0.000730936	0.0127677	86.3815	13.1244	0.248609	0.245418	5.41488	13.3699	86.6301	0.494027	99.506
EIO.MW17.16	04	A	0	0	8.04222e-05	0	5.63786e-05	0	0	3.81456e-05	0.000128021	0.000181211	0.00328409	0.0163851	0.0164768	0.00328409	5.63786e-05	3.81456e-05	0.000334432	0.0198554	82.9839	16.5401	0.283946	0.192117	1.65644	16.7322	83.2678	0.476063	99.5239
EIO.MW17.16	04	B	0	0	8.65347e-05	0	6.09278e-05	0	0	4.63743e-05	0.000320909	0.000191296	0.00345966	0.0172369	0.0173355	0.00345966	6.09278e-05	4.63743e-05	0.000538807	0.0209025	82.9352	16.5514	0.291486	0.22186	2.51294	16.7733	83.2267	0.513346	99.4867
EIO.MW17.16	05	A	0	0	0.000105761	6.35324e-05	0.00010697	0.000134024	0	4.34852e-05	0.00329133	0.000112542	0.00443423	0.0330878	0.0332083	0.00458884	0.00010697	4.34852e-05	0.00341952	0.0379476	87.511	12.0926	0.281887	0.114593	8.26627	12.2072	87.7928	0.39648	99.6035
EIO.MW17.16	05	B	0	0	0.000102874	6.82281e-05	0.000123709	0.000116999	0	5.02278e-05	0.00356214	9.62863e-05	0.00477596	0.0358573	0.0359746	0.00491094	0.000123709	5.02278e-05	0.00367182	0.0410595	87.6158	11.9605	0.301293	0.122329	8.20861	12.0829	87.9171	0.423623	99.5764
EIO.MW17.16	06	A	0	0	9.236e-05	0	4.30791e-05	0	0	3.60924e-05	0.00089684	7.72392e-05	0.003288	0.0164957	0.0166009	0.003288	4.30791e-05	3.60924e-05	0.00098482	0.0199681	83.1373	16.4662	0.21574	0.18075	4.70015	16.647	83.353	0.39649	99.6035
EIO.MW17.16	06	B	0	0	8.22619e-05	0	6.0652e-05	0	0	4.34643e-05	0.000535419	6.57834e-05	0.00349257	0.0178284	0.0179222	0.00349257	6.0652e-05	4.34643e-05	0.00061035	0.0215189	83.2859	16.2302	0.281855	0.201982	2.75812	16.4322	83.5678	0.483837	99.5162
EIO.MW17.16	07	A	0	0	0	0	4.7977e-05	0.000142858	0	5.67524e-05	0.00021046	6.81293e-05	0.00449399	0.0161226	0.0161226	0.0046588	4.7977e-05	5.67524e-05	0.000288063	0.0208861	77.1928	22.3058	0.229708	0.271724	1.36045	22.5775	77.4225	0.501431	99.4986
EIO.MW17.16	07	B	0	0	0	0	7.51894e-05	0.000111463	0	5.94195e-05	0.000989712	7.43438e-05	0.006319	0.0219707	0.0219707	0.00644759	7.51894e-05	5.94195e-05	0.00107439	0.0285529	76.9473	22.5812	0.263334	0.208103	3.62637	22.7893	77.2107	0.471437	99.5286
EIO.MW17.16	08	A	0	0	0	0	6.8872e-05	9.18063e-05	0	3.42075e-05	0.000682983	8.37842e-05	0.00271312	0.0135852	0.0135852	0.00281903	6.8872e-05	3.42075e-05	0.000778419	0.0165073	82.2981	17.0775	0.417221	0.207227	4.50324	17.2847	82.7153	0.624447	99.3756
EIO.MW17.16	08	B	0	0	0	0	7.58835e-05	8.46644e-05	0	5.77612e-05	0.00202865	9.81123e-05	0.00356741	0.0196381	0.0196381	0.00366508	7.58835e-05	5.77612e-05	0.0021404	0.0234369	83.7917	15.6381	0.323779	0.246454	8.36838	15.8845	84.1155	0.570233	99.4298
EIO.MW17.16	09	A	0	0	7.8737e-05	0	6.87782e-05	0.000110939	0	4.31146e-05	0.000811301	0.000142194	0.00250666	0.0160449	0.0161346	0.00263464	6.87782e-05	4.31146e-05	0.000973269	0.0188812	85.4536	13.9538	0.364269	0.228347	4.90202	14.1822	85.8178	0.592616	99.4074
EIO.MW17.16	09	B	0	0	8.50561e-05	0	5.28704e-05	0.000106274	0	4.05715e-05	0.00084363	0.000120609	0.0024845	0.0163574	0.0164544	0.0026071	5.28704e-05	4.05715e-05	0.000981011	0.0191549	85.9015	13.6106	0.276015	0.211808	4.87195	13.8224	86.1776	0.487823	99.5122
EIO.MW17.16	10	A	0	0	7.39018e-05	0	0.000101312	0	0	4.35052e-05	0.00313932	0	0.00636751	0.0318596	0.0319439	0.00636751	0.000101312	4.35052e-05	0.00313932	0.0384562	83.0656	16.5578	0.263447	0.113129	7.54726	16.671	83.329	0.376577	99.6234
EIO.MW17.16	10	B	0	0	6.01314e-05	0	0.000120057	0	0	5.69016e-05	0.00416967	0	0.00786043	0.0383201	0.0383886	0.00786043	0.000120057	5.69016e-05	0.00416967	0.046426	82.6877	16.9311	0.258599	0.122564	8.24116	17.0537	82.9463	0.381163	99.6188
EIO.MW17.41	01	A	0	7.83261e-05	0	9.93341e-05	0.0270282	0	0	0.000302955	0.000734869	8.54629e-05	0.000103517	0.00120749	0.00120749	0.000103517	0.0271175	0.000302955	0.000832217	0.0287315	4.20267	0.360291	94.3826	1.05444	2.815	1.41473	98.5853	95.437	4.56296
EIO.MW17.41	01	B	0	0.000117625	0	6.35299e-05	0.057228	0	0	0.000660871	0.00506245	0.000277672	0.000106492	0.0023673	0.0023673	0.000106492	0.0573621	0.000660871	0.00537873	0.0604967	3.9131	0.176029	94.8185	1.09241	8.165	1.26844	98.7316	95.9109	4.08913
EIO.MW17.41	02	A	0	9.12192e-05	0	0	0.0488096	0	0	0.000635251	0.00460386	0.00012318	9.15761e-05	0.00211767	0.00211767	9.15761e-05	0.0489136	0.000635251	0.00474417	0.0517581	4.09147	0.176931	94.5043	1.22735	8.39642	1.40428	98.5957	95.7316	4.2684
EIO.MW17.41	02	B	0	7.45574e-05	0	0	0.0309669	0	0	0.000452793	0.000417748	9.14696e-05	6.70885e-05	0.00138813	0.00138813	6.70885e-05	0.0310519	0.000452793	0.000521937	0.0329599	4.21157	0.203546	94.2111	1.37377	1.55887	1.57732	98.4227	95.5849	4.41511
EIO.MW17.41	03	A	0	0.000100165	0	0	0.0356858	0	0	0.00030275	0.00244462	0	0	0.0016361	0.0016361	0	0.0357999	0.00030275	0.00244462	0.0377388	4.33534	0	94.8624	0.802225	6.08366	0.802225	99.1978	95.6647	4.33534
EIO.MW17.41	03	B	0	0.000103392	0	0	0.0412247	0	0	0.000331698	0.00285683	0	0	0.00184477	0.00184477	0	0.0413425	0.000331698	0.00285683	0.043519	4.23899	0	94.9988	0.762191	6.16018	0.762191	99.2378	95.761	4.23899
EIO.MW17.41	04	A	0	0	0	0	0.0523455	0	0	0.000447529	0.00617811	0.000111948	0	0.00237894	0.00237894	0	0.0523455	0.000447529	0.00630563	0.055172	4.31186	0	94.877	0.811153	10.2568	0.811153	99.1888	95.6881	4.31186
EIO.MW17.41	04	B	0	0	0	0	0.0400134	0	0	0.000339766	0.00316395	9.63133e-05	0	0.00178232	0.00178232	0	0.0400134	0.000339766	0.00327366	0.0421355	4.22998	0	94.9637	0.806367	7.20925	0.806367	99.1936	95.77	4.22998
EIO.MW17.41	05	A	0	9.19788e-05	0	0	0.0693701	0	0	0.000418778	0.0109725	0.000146556	0	0.00348062	0.00348062	0	0.0694749	0.000418778	0.0111395	0.0733743	4.74365	0	94.6856	0.570742	13.1807	0.570742	99.4293	95.2563	4.74365
EIO.MW17.41	05	B	0	9.90964e-05	0	0	0.0647039	0	0	0.000380159	0.00951422	0.000145196	0	0.00331351	0.00331351	0	0.0648169	0.000380159	0.0096796	0.0685105	4.8365	0	94.6086	0.554892	12.3796	0.554892	99.4451	95.1635	4.8365
EIO.MW17.41	06	A	0	0	0	6.72163e-05	0.056005	0	0	0.000434462	0.00345053	0	0	0.00261383	0.00261383	0	0.056005	0.000434462	0.00345053	0.0590533	4.42623	0	94.8381	0.735712	5.52052	0.735712	99.2643	95.5738	4.42623
EIO.MW17.41	06	B	0	0	0	6.25405e-05	0.0507481	0	0	0.00038381	0.00279178	0	0	0.00232502	0.00232502	0	0.0507481	0.00038381	0.00279178	0.053457	4.34933	0	94.9327	0.717979	4.96327	0.717979	99.282	95.6507	4.34933
EIO.MW17.41	07	A	0	8.734e-05	0	0	0.0552972	0	0	0.000543103	0.0033469	0	0.00012984	0.0026811	0.0026811	0.00012984	0.0553968	0.000543103	0.0033469	0.0587508	4.56352	0.221001	94.2911	0.924418	5.38973	1.14542	98.8546	95.2155	4.78452
EIO.MW17.41	07	B	0	9.27682e-05	0	0	0.0462756	0	0	0.00045148	0.00222408	0	9.19241e-05	0.00223413	0.00223413	9.19241e-05	0.0463814	0.00045148	0.00222408	0.0491589	4.54471	0.186994	94.3499	0.91841	4.32845	1.1054	98.8946	95.2683	4.7317
EIO.MW17.41	08	A	0	0	0	0	0.0271103	0	0	0.000264608	0.000390013	0	0	0.00121938	0.00121938	0	0.0271103	0.000264608	0.000390013	0.0285943	4.26443	0	94.8102	0.925387	1.3456	0.925387	99.0746	95.7356	4.26443
EIO.MW17.41	08	B	0	0	0	0	0.0301459	0	0	0.000283956	0.000848231	0	0	0.00121503	0.00121503	0	0.0301459	0.000283956	0.000848231	0.0316449	3.83958	0	95.2631	0.89732	2.61049	0.89732	99.1027	96.1604	3.83958
EIO.MW17.41	09	A	0	0	0	0	0.0487545	0	0	0.00047797	0.00356085	0	0	0.00195532	0.00195532	0	0.0487545	0.00047797	0.00356085	0.0511878	3.81991	0	95.2463	0.933759	6.50399	0.933759	99.0662	96.1801	3.81991
EIO.MW17.41	09	B	0	0	0	0	0.0428049	0	0	0.000452584	0.00720224	0	0	0.00186829	0.00186829	0	0.0428049	0.000452584	0.00720224	0.0451258	4.14018	0	94.8569	1.00294	13.7636	1.00294	98.9971	95.8598	4.14018
EIO.MW17.41	10	A	0	0.000103676	0	0	0.0582846	0	0	0.000473727	0.00506793	0	0	0.00283623	0.00283623	0	0.0584028	0.000473727	0.00506793	0.0617128	4.59585	0	94.6365	0.767633	7.58892	0.767633	99.2324	95.4042	4.59585
EIO.MW17.41	10	B	0	9.34903e-05	0	0	0.055745	0	0	0.00048091	0.00500084	0	0	0.00267129	0.00267129	0	0.0558515	0.00048091	0.00500084	0.0590037	4.52733	0	94.6576	0.815049	7.81325	0.815049	99.185	95.4727	4.52733
EIO.MW17.43	01	A	0	7.86155e-05	6.24516e-05	0	0.0409395	0	0	0.000695077	0.00392564	0.000112807	0.000917976	0.0238374	0.0239086	0.000917976	0.0410291	0.000695077	0.00405414	0.0665507	35.9253	1.37936	61.6509	1.04443	5.74201	2.42379	97.5762	62.6953	37.3047
EIO.MW17.43	01	B	0	7.46391e-05	6.06508e-05	0	0.0396246	0	0	0.000691015	0.00527259	0.000123499	0.00089535	0.0237809	0.0238501	0.00089535	0.0397097	0.000691015	0.00541326	0.0651461	36.6101	1.37437	60.9548	1.06072	7.67192	2.43509	97.5649	62.0155	37.9845
EIO.MW17.43	02	A	0	0	0	0	0.0246042	0	0	0.000362525	0.00130422	0.000168377	0.000115071	0.00131788	0.00131788	0.000115071	0.0246042	0.000362525	0.00149601	0.0263996	4.99205	0.43588	93.1989	1.37322	5.36288	1.8091	98.1909	94.5721	5.42793
EIO.MW17.43	02	B	0	0	0	0	0.0363343	0	0	0.000477763	0.0042947	0.000189212	0.000166873	0.0018745	0.0018745	0.000166873	0.0363343	0.000477763	0.00451022	0.0388534	4.82454	0.429495	93.5163	1.22966	10.4009	1.65915	98.3408	94.746	5.25403
EIO.MW17.43	03	A	0	0	0	0	0.0455684	0	0	0.00131268	0.0130259	0.000254923	0.00169118	0.0247892	0.0247892	0.00169118	0.0455684	0.00131268	0.0133162	0.0733614	33.7905	2.30527	62.1149	1.78933	15.363	4.0946	95.9054	63.9042	36.0958
EIO.MW17.43	03	B	0	0	0	0	0.0442488	0	0	0.0012159	0.012518	0.000243064	0.00161831	0.0241722	0.0241722	0.00161831	0.0442488	0.0012159	0.0127948	0.0712552	33.9234	2.27115	62.099	1.7064	15.2229	3.97755	96.0224	63.8054	36.1946
EIO.MW17.43	04	A	0	0	0	0	0.0350158	0	0	0.00046343	0.00777756	0.000108172	0.000973728	0.0298119	0.0298119	0.000973728	0.0350158	0.00046343	0.00790077	0.0662648	44.989	1.46945	52.8422	0.69936	10.6529	2.16881	97.8312	53.5416	46.4584
EIO.MW17.43	04	B	0	0	0	0	0.0352851	0	0	0.000452949	0.0101883	9.06674e-05	0.000998368	0.0314725	0.0314725	0.000998368	0.0352851	0.000452949	0.0102916	0.0682089	46.1413	1.46369	51.731	0.664062	13.1102	2.12775	97.8722	52.395	47.605
EIO.MW17.43	05	A	0	7.29832e-05	0	0	0.0424892	0	0	0.000856323	0.0041954	0.000138078	0.00023766	0.00205744	0.00205744	0.00023766	0.0425724	0.000856323	0.00435268	0.0457238	4.4997	0.519772	93.1077	1.87281	8.69206	2.39259	97.6074	94.9805	5.01947
EIO.MW17.43	05	B	0	7.35775e-05	0	0	0.0492264	0	0	0.00092923	0.00552524	0.000133727	0.000138728	0.00233261	0.00233261	0.000138728	0.0493103	0.00092923	0.00567756	0.0527109	4.42529	0.263187	93.5486	1.76288	9.72378	2.02607	97.9739	95.3115	4.68848
EIO.MW17.43	06	A	0	7.87894e-05	8.93412e-05	0	0.0467632	0	0	0.000497162	0.00782302	0.000126142	0.00111564	0.039589	0.0396909	0.00111564	0.046853	0.000497162	0.0079667	0.0881567	45.0231	1.26552	53.1474	0.563953	8.28799	1.82947	98.1705	53.7114	46.2886
EIO.MW17.43	06	B	0	7.75686e-05	6.53037e-05	0	0.0509122	0	0	0.000570634	0.0123846	0.000134836	0.00130651	0.0475871	0.0476616	0.00130651	0.0510006	0.000570634	0.0125382	0.100539	47.4059	1.2995	50.727	0.567573	11.0881	1.86708	98.1329	51.2946	48.7054
EIO.MW17.43	07	A	0	0	6.8525e-05	0	0.0275244	0	0	0.000241731	0.00589391	0.000394558	0.000688678	0.0250322	0.0251103	0.000688678	0.0275244	0.000241731	0.00634333	0.0535651	46.8781	1.28569	51.385	0.451285	10.5884	1.73697	98.263	51.8362	48.1638
EIO.MW17.43	07	B	0	0	4.90135e-05	0	0.0247642	0	0	0.00023454	0.004739	0.000334448	0.00067915	0.0220876	0.0221434	0.00067915	0.0247642	0.00023454	0.00511996	0.0478213	46.3045	1.42018	51.7848	0.490452	9.67102	1.91064	98.0894	52.2753	47.7247
EIO.MW17.43	08	A	0	9.03019e-05	7.30712e-05	0.000116243	0.0297813	0	0	0.000376336	0.00516162	5.54503e-05	0.00088911	0.0243773	0.0244606	0.00088911	0.0298842	0.000376336	0.00522478	0.0556103	43.9858	1.59882	53.7387	0.676738	8.58843	2.27556	97.7244	54.4154	45.5846
EIO.MW17.43	08	B	0	9.79169e-05	9.60512e-05	0.00012867	0.0343219	0	0	0.000451379	0.00812572	0.000102851	0.0010933	0.0285479	0.0286574	0.0010933	0.0344335	0.000451379	0.00824287	0.0646356	44.3368	1.69149	53.2733	0.698345	11.3104	2.38983	97.6102	53.9717	46.0283
EIO.MW17.43	09	A	0	0.000111249	0.000135714	0	0.0303511	0	0	0.000942425	0.00334872	0.000146012	0.00131513	0.0177607	0.0179154	0.00131513	0.0304779	0.000942425	0.00351503	0.0506508	35.3704	2.59646	60.1725	1.86063	6.48939	4.45709	95.5429	62.0332	37.9668
EIO.MW17.43	09	B	0	9.12818e-05	0.000100636	0	0.0246461	0	0	0.000761757	0.00145038	0.00010302	0.00104175	0.0145558	0.0146705	0.00104175	0.0247502	0.000761757	0.00156772	0.0412242	35.5872	2.52703	60.038	1.84784	3.6636	4.37487	95.6251	61.8858	38.1142
EIO.MW17.43	10	A	0	0	0	0	0.0177764	0	0	0.000248844	0.000455035	0.000122563	0.000309087	0.00964752	0.00964752	0.000309087	0.0177764	0.000248844	0.000594641	0.0279818	34.4778	1.1046	63.5283	0.889307	2.08088	1.99391	98.0061	64.4176	35.5824
EIO.MW17.43	10	B	0	0	0	0	0.0220312	0	0	0.000291522	0.000777169	0.000153162	0.000437098	0.0119679	0.0119679	0.000437098	0.0220312	0.000291522	0.000951629	0.0347277	34.4621	1.25865	63.4398	0.839452	2.66717	2.0981	97.9019	64.2792	35.7208
EIO.MW17.13	01	A	0	0.000103267	0	5.70691e-05	0.0366025	0	0	0.00467125	0.00281119	0.000127364	0.00056304	0.00160793	0.00160793	0.00056304	0.0367203	0.00467125	0.00295626	0.0435625	3.6911	1.29249	84.2933	10.7231	6.35499	12.0156	87.9844	95.0164	4.98359
EIO.MW17.13	01	B	0	8.16173e-05	0	8.78654e-05	0.0284053	0	0	0.00364033	0.00127478	8.22957e-05	0.000626521	0.00132849	0.00132849	0.000626521	0.0284983	0.00364033	0.00136852	0.0340937	3.8966	1.83765	83.5883	10.6774	3.85908	12.5151	87.4849	94.2658	5.73425
EIO.MW17.13	02	A	0	0.000108861	0	6.12749e-05	0.0318892	0	0	0.00176726	0.00175778	8.74245e-05	0.000202421	0.0013065	0.0013065	0.000202421	0.0320133	0.00176726	0.00185737	0.0352895	3.70224	0.573601	90.7163	5.00791	5.00006	5.58151	94.4185	95.7242	4.27584
EIO.MW17.13	02	B	0	0.000120817	0	9.24058e-05	0.0297869	0	0	0.00159124	0.00178136	9.52925e-05	0.000171338	0.00125513	0.00125513	0.000171338	0.0299246	0.00159124	0.00188991	0.0329423	3.81009	0.520116	90.8394	4.8304	5.42575	5.35052	94.6495	95.6698	4.3302
EIO.MW17.13	03	A	0	9.62334e-05	0	0.000104225	0.0322546	0	0	0.00320857	0.00333164	5.61239e-05	0.000417024	0.00148711	0.00148711	0.000417024	0.0323643	0.00320857	0.00339557	0.037477	3.96806	1.11275	86.3578	8.56144	8.30769	9.67418	90.3258	94.9192	5.0808
EIO.MW17.13	03	B	0	9.01202e-05	0	0.000104111	0.0268212	0	0	0.00283737	0.00177579	7.57067e-05	0.000358266	0.00121387	0.00121387	0.000358266	0.026924	0.00283737	0.00186202	0.0313335	3.87403	1.1434	85.9272	9.0554	5.60925	10.1988	89.8012	94.9826	5.01743
EIO.MW17.13	04	A	0	9.66663e-05	0	0	0.0373553	0	0	0.00575127	0.00271012	0.000114015	0.000656103	0.00174523	0.00174523	0.000656103	0.0374655	0.00575127	0.00283999	0.0456181	3.82574	1.43825	82.1286	12.6074	5.86071	14.0457	85.9543	94.736	5.26399
EIO.MW17.13	04	B	0	9.26744e-05	0	0	0.0313237	0	0	0.00458408	0.00210811	8.74055e-05	0.000580274	0.0014877	0.0014877	0.000580274	0.0314293	0.00458408	0.00220767	0.0380814	3.90665	1.52377	82.532	12.0376	5.47958	13.5614	86.4386	94.5696	5.43042
EIO.MW17.13	05	A	0	8.49243e-05	0	0	0.0337884	0	0	0.00423421	0.00160653	0.00018569	0.000417165	0.00163428	0.00163428	0.000417165	0.0338852	0.00423421	0.00181805	0.0401709	4.06833	1.03848	84.3527	10.5405	4.32982	11.579	88.421	94.8932	5.1068
EIO.MW17.13	05	B	0	8.17931e-05	0	0	0.0259175	0	0	0.00328648	0.00155012	9.41265e-05	0.000297454	0.00114201	0.00114201	0.000297454	0.0260107	0.00328648	0.00165733	0.0307366	3.71548	0.967751	84.6244	10.6924	5.11618	11.6601	88.3399	95.3168	4.68323
EIO.MW17.13	06	A	0	6.90429e-05	0	0	0.0169985	0	0	0.00152928	0.000814739	0	0.000127064	0.000800837	0.000800837	0.000127064	0.0170772	0.00152928	0.000814739	0.0195344	4.09962	0.65046	87.4212	7.82867	4.0038	8.47913	91.5209	95.2499	4.75008
EIO.MW17.13	06	B	0	8.78761e-05	0	0	0.0225951	0	0	0.00191857	0.00108002	0	0.000201987	0.00104734	0.00104734	0.000201987	0.0226953	0.00191857	0.00108002	0.0258632	4.04953	0.780982	87.7513	7.41814	4.00851	8.19912	91.8009	95.1695	4.83051
EIO.MW17.13	07	A	0	7.64848e-05	0	0	0.0259401	0	0	0.0015827	0.00196929	9.87638e-05	0.000193893	0.000968674	0.000968674	0.000193893	0.0260273	0.0015827	0.00208179	0.0287726	3.36666	0.67388	90.4587	5.50072	6.74715	6.1746	93.8254	95.9595	4.04054
EIO.MW17.13	07	B	0	6.88255e-05	0	0	0.0173969	0	0	0.00106161	0.000798244	7.02332e-05	0.000218465	0.000820694	0.000820694	0.000218465	0.0174754	0.00106161	0.000878243	0.0195762	4.19231	1.11598	89.2687	5.42298	4.29366	6.53895	93.461	94.6917	5.30829
EIO.MW17.13	08	A	0	6.78958e-05	0	0	0.0323887	0	0	0.00540435	0.00229129	5.64232e-05	0.00039588	0.00154247	0.00154247	0.00039588	0.0324661	0.00540435	0.00235556	0.0398088	3.87469	0.994454	81.5551	13.5758	5.58661	14.5702	85.4298	95.1309	4.86915
EIO.MW17.13	08	B	0	0.000105695	0	0	0.0437687	0	0	0.00649644	0.00567117	7.3297e-05	0.000435072	0.00204312	0.00204312	0.000435072	0.0438892	0.00649644	0.00575466	0.0528638	3.86487	0.823006	83.0231	12.289	9.81714	13.112	86.888	95.3121	4.68787
EIO.MW17.13	09	A	0	0	0	0	0.0124178	0	0	0.000200103	0.000351227	0	0	0.000619694	0.000619694	0	0.0124178	0.000200103	0.000351227	0.0132375	4.68133	0	93.807	1.51163	2.58468	1.51163	98.4884	95.3187	4.68133
EIO.MW17.13	09	B	0	0	0	0	0.012488	0	0	0.000202464	0.000153963	0	0	0.000599796	0.000599796	0	0.012488	0.000202464	0.000153963	0.0132903	4.51304	0	93.9636	1.5234	1.14519	1.5234	98.4766	95.487	4.51304
EIO.MW17.13	10	A	0	8.29013e-05	0	0.00013898	0.0138722	0	0	0.000987323	0.000507636	0	0.000310366	0.000731795	0.000731795	0.000310366	0.0139667	0.000987323	0.000507636	0.0159962	4.57481	1.94025	87.3127	6.17224	3.07587	8.11249	91.8875	93.4849	6.51506
EIO.MW17.13	10	B	0	8.86975e-05	0	0.000128391	0.0138511	0	0	0.000922336	0.000554381	0	0.000266956	0.000704193	0.000704193	0.000266956	0.0139522	0.000922336	0.000554381	0.0158457	4.44407	1.68473	88.0505	5.82074	3.38036	7.50547	92.4945	93.8712	6.1288
EIO.MW17.22	01	A	0	0.000187913	0	0	0.0418537	0	0	0.000414661	0.000254466	0.000265165	0	0.00186876	0.00186876	0	0.0420679	0.000414661	0.000556504	0.0443514	4.21353	0	94.8515	0.934945	1.23921	0.934945	99.0651	95.7865	4.21353
EIO.MW17.22	01	B	0	0.000200125	0	0	0.039696	0	0	0.000412722	0.000280204	0.000265	0	0.00142634	0.00142634	0	0.0399242	0.000412722	0.000582054	0.0417632	3.4153	0	95.5965	0.988243	1.37454	0.988243	99.0118	96.5847	3.4153
EIO.MW17.22	02	A	0	0.00023857	0	0.00012731	0.0494037	0	0	0.000956079	0.00187589	0.000107845	0.000112798	0.00222025	0.00222025	0.000112798	0.0496756	0.000956079	0.00199873	0.0529647	4.19193	0.212967	93.79	1.80512	3.63647	2.01809	97.9819	95.5951	4.4049
EIO.MW17.22	02	B	0	0.000246172	0	0.000134334	0.0504147	0	0	0.000948053	0.0015685	0.000125139	0.000105339	0.00196042	0.00196042	0.000105339	0.0506953	0.000948053	0.00171105	0.0537091	3.65006	0.196129	94.3886	1.76516	3.08741	1.96129	98.0387	96.1538	3.84619
EIO.MW17.22	03	A	0	0.00017556	0	0.000277778	0.0214762	0	0	0.000246935	0.000427007	0.000116089	0	0.000987981	0.000987981	0	0.0216764	0.000246935	0.00055924	0.0229113	4.3122	0	94.61	1.07779	2.38273	1.07779	98.9222	95.6878	4.3122
EIO.MW17.22	03	B	0	0.000168931	0	0.000257229	0.0238273	0	0	0.000290204	0.000642717	0.000148694	0	0.00102942	0.00102942	0	0.0240198	0.000290204	0.000812088	0.0253395	4.06251	0	94.7922	1.14527	3.10532	1.14527	98.8547	95.9375	4.06251
EIO.MW17.22	04	A	0	0.000207605	0	0	0.0641268	0	0	0.00157815	0.00235276	8.86217e-05	0.000154814	0.00261177	0.00261177	0.000154814	0.0643635	0.00157815	0.0024537	0.0687082	3.80126	0.225321	93.6765	2.29688	3.44806	2.5222	97.4778	95.9734	4.02658
EIO.MW17.22	04	B	0	0.00030635	0	0	0.07031	0	0	0.00160385	0.0028037	0.00015022	0.000158978	0.00278099	0.00278099	0.000158978	0.0706592	0.00160385	0.00297481	0.075203	3.69797	0.211399	93.9579	2.1327	3.80518	2.3441	97.6559	96.0906	3.90937
EIO.MW17.22	05	A	0	9.54047e-05	8.67255e-05	0.000124525	0.0167192	0	0	0.000472081	0.00096319	0.000178252	0.000567987	0.00897455	0.00907341	0.000567987	0.016828	0.000472081	0.00116623	0.0269415	33.6783	2.10822	62.4613	1.75225	4.14915	3.86047	96.1395	64.2135	35.7865
EIO.MW17.22	05	B	0	0.000103022	8.80508e-05	0.000135908	0.0169706	0	0	0.000476441	0.00123672	0.000220798	0.000614907	0.00864488	0.00874525	0.000614907	0.017088	0.000476441	0.00148822	0.0269246	32.4805	2.28381	63.4662	1.76953	5.23785	4.05334	95.9467	65.2357	34.7643
EIO.MW17.22	06	A	0	0.000191885	0	0.000120305	0.0493856	0	0	0.000897081	0.00424627	0	0.000164734	0.00235101	0.00235101	0.000164734	0.0496043	0.000897081	0.00424627	0.0530171	4.43444	0.310719	93.5628	1.69206	7.41533	2.00278	97.9972	95.2548	4.74516
EIO.MW17.22	06	B	0	0.000193495	0	0.000104216	0.0467448	0	0	0.000883508	0.00352968	0	0.000150471	0.00185123	0.00185123	0.000150471	0.0469654	0.000883508	0.00352968	0.0498506	3.71355	0.301845	94.2123	1.77231	6.61233	2.07416	97.9258	95.9846	4.0154
EIO.MW17.22	07	A	0	0.000106723	0	0	0.0235602	0	0	0.000673045	0.001558	0.000159928	9.89733e-05	0.0010187	0.0010187	9.89733e-05	0.0236818	0.000673045	0.00174017	0.0254726	3.99921	0.388549	92.97	2.64223	6.3947	3.03078	96.9692	95.6122	4.38775
EIO.MW17.22	07	B	0	0.000112892	0	0	0.0245421	0	0	0.000663595	0.00159267	0.000173141	9.43565e-05	0.000981561	0.000981561	9.43565e-05	0.0246708	0.000663595	0.00178989	0.0264103	3.71659	0.357272	93.4135	2.51264	6.34709	2.86991	97.1301	95.9261	4.07386
EIO.MW17.22	08	A	0	0.000200544	0	0.000380667	0.0286487	0	0	0.000513569	0.00146751	0	0	0.00136734	0.00136734	0	0.0288773	0.000513569	0.00146751	0.0307582	4.44544	0	93.8849	1.6697	4.55384	1.6697	98.3303	95.5546	4.44544
EIO.MW17.22	08	B	0	0.000141182	0	8.38232e-05	0.0377824	0	0	0.00076748	0.00193181	0	0	0.0014515	0.0014515	0	0.0379434	0.00076748	0.00193181	0.0401623	3.61408	0	94.475	1.91095	4.58925	1.91095	98.0891	96.3859	3.61408
EIO.MW17.22	09	A	0	0.000129458	0	0	0.0388875	0	0	0.000451117	0.0014024	0	0	0.00162626	0.00162626	0	0.0390351	0.000451117	0.0014024	0.0411125	3.95563	0	94.9471	1.09727	3.2986	1.09727	98.9027	96.0444	3.95563
EIO.MW17.22	09	B	0	0.000131559	0	0	0.0377761	0	0	0.000412523	0.00154372	0	0	0.00163297	0.00163297	0	0.0379261	0.000412523	0.00154372	0.0399716	4.08534	0	94.8826	1.03204	3.71844	1.03204	98.968	95.9147	4.08534
EIO.MW17.22	10	A	0	0.00036368	5.78858e-05	0.000154778	0.0565356	0	0	0.00274071	0.000951828	0.000345926	0.000325153	0.00233242	0.00239841	0.000325153	0.0569502	0.00274071	0.00134586	0.0624145	3.84271	0.520957	91.2452	4.39114	2.11081	4.9121	95.0879	95.6363	4.36367
EIO.MW17.22	10	B	0	0.000490825	4.90158e-05	0.000220602	0.0554185	0	0	0.00244974	0.000919396	0.00030402	0.000280206	0.00240446	0.00246034	0.000280206	0.055978	0.00244974	0.00126569	0.0611683	4.02224	0.458089	91.5148	4.00491	2.02725	4.463	95.537	95.5197	4.48033
EIO.MW17.33	01	A	0	0.000260734	0	0.000109071	0.0571766	0	0	0.000502058	0.000199514	0.000149518	0.000138938	0.00250805	0.00250805	0.000138938	0.0574738	0.000502058	0.000369824	0.0606228	4.13714	0.229185	94.8055	0.828166	0.606342	1.05735	98.9426	95.6337	4.36633
EIO.MW17.33	01	B	0	0.000254561	0	8.2313e-05	0.0607832	0	0	0.000517695	0.00023377	5.68039e-05	0.000162543	0.00244991	0.00244991	0.000162543	0.0610734	0.000517695	0.000298473	0.0642036	3.81585	0.253168	95.1246	0.806333	0.462734	1.0595	98.9405	95.931	4.06902
EIO.MW17.33	02	A	0	0.000108046	0	0	0.034882	0	0	0.000335788	0	0	0	0.00143126	0.00143126	0	0.0350052	0.000335788	0	0.0367722	3.89222	0	95.1946	0.913158	0	0.913158	99.0868	96.1078	3.89222
EIO.MW17.33	02	B	0	0.000135716	0	0	0.0391469	0	0	0.000411459	0	0	0	0.0014542	0.0014542	0	0.0393017	0.000411459	0	0.0411673	3.53241	0	95.4681	0.999479	0	0.999479	99.0005	96.4676	3.53241
EIO.MW17.33	03	A	0	0.000227796	0	0	0.0610951	0	0	0.000424836	0.000272152	0	0	0.00264371	0.00264371	0	0.0613548	0.000424836	0.000272152	0.0644233	4.10365	0	95.2369	0.659444	0.420667	0.659444	99.3406	95.8963	4.10365
EIO.MW17.33	03	B	0	0.000227063	0	0	0.0595856	0	0	0.000413217	0.000290567	0	0	0.0024371	0.0024371	0	0.0598444	0.000413217	0.000290567	0.0626947	3.88726	0	95.4536	0.659094	0.461325	0.659094	99.3409	96.1127	3.88726
EIO.MW17.33	04	A	0	0.000175584	0	0	0.0494503	0	0	0.000534641	0.00101789	0	8.28949e-05	0.00202728	0.00202728	8.28949e-05	0.0496505	0.000534641	0.00101789	0.0522953	3.87659	0.158513	94.9425	1.02235	1.90926	1.18086	98.8191	95.9649	4.03511
EIO.MW17.33	04	B	0	0.000185639	0	0	0.0556808	0	0	0.000608206	0.00120903	0	6.23748e-05	0.00203449	0.00203449	6.23748e-05	0.0558925	0.000608206	0.00120903	0.0585975	3.47197	0.106446	95.3836	1.03794	2.02157	1.14438	98.8556	96.4216	3.57841
EIO.MW17.33	05	A	0	0.000132527	0	0	0.0359912	0	0	0.000361094	0.000298036	0	0	0.00146691	0.00146691	0	0.0361423	0.000361094	0.000298036	0.0379703	3.86332	0	95.1857	0.950992	0.778806	0.950992	99.049	96.1367	3.86332
EIO.MW17.33	05	B	0	0.000131919	0	0	0.0409306	0	0	0.000407782	0.000550597	0	0	0.00186126	0.00186126	0	0.0410809	0.000407782	0.000550597	0.04335	4.29356	0	94.7658	0.940674	1.25419	0.940674	99.0593	95.7064	4.29356
EIO.MW17.33	06	A	0	0.000297966	0	0	0.0911966	0	0	0.00054541	0.00275313	0.000214163	0	0.00403255	0.00403255	0	0.0915362	0.00054541	0.00299707	0.0961142	4.19559	0	95.237	0.56746	3.02395	0.56746	99.4325	95.8044	4.19559
EIO.MW17.33	06	B	0	0.000315039	0	0	0.0981859	0	0	0.000595398	0.00380003	0.000211335	0	0.004306	0.004306	0	0.098545	0.000595398	0.00404075	0.103446	4.16254	0	95.2619	0.575562	3.75929	0.575562	99.4244	95.8375	4.16254
EIO.MW17.33	07	A	0	0.000125189	0	0	0.0355526	0	0	0.000442281	0.000311664	0	0	0.00153949	0.00153949	0	0.0356953	0.000442281	0.000311664	0.0376771	4.08601	0	94.7401	1.17387	0.820411	1.17387	98.8261	95.914	4.08601
EIO.MW17.33	07	B	0	0.000144764	0	0	0.0332448	0	0	0.000401857	0.000206686	0	0	0.00129825	0.00129825	0	0.0334098	0.000401857	0.000206686	0.0351099	3.69766	0	95.1578	1.14457	0.585238	1.14457	98.8554	96.3023	3.69766
EIO.MW17.33	08	A	0	0.000127926	0	0	0.0364944	0	0	0.0004742	0.00157108	0	0	0.00126469	0.00126469	0	0.0366402	0.0004742	0.00157108	0.0383791	3.29526	0	95.4692	1.23557	3.93259	1.23557	98.7644	96.7047	3.29526
EIO.MW17.33	08	B	0	0.000121746	0	0	0.0385042	0	0	0.000501915	0.00111756	0	0	0.00151363	0.00151363	0	0.038643	0.000501915	0.00111756	0.0406586	3.72278	0	95.0428	1.23446	2.67512	1.23446	98.7655	96.2772	3.72278
EIO.MW17.33	09	A	0	0.000214343	0	0	0.056365	0	0	0.000515084	0.00133599	0.000122446	0	0.00251623	0.00251623	0	0.0566094	0.000515084	0.00147546	0.0596407	4.21898	0	94.9174	0.863645	2.4142	0.863645	99.1364	95.781	4.21898
EIO.MW17.33	09	B	0	0.000184106	0	0	0.057613	0	0	0.000536431	0.00138643	0.000167906	0	0.00260645	0.00260645	0	0.0578229	0.000536431	0.00157768	0.0609658	4.27527	0	94.8448	0.879889	2.52254	0.879889	99.1201	95.7247	4.27527
EIO.MW17.33	10	A	0	0.00150096	0	0	0.350131	0	0	0.00146489	0.00609154	0.000690368	0	0.0162652	0.0162652	0	0.351842	0.00146489	0.00687791	0.369572	4.40109	0	95.2025	0.396375	1.82705	0.396375	99.6036	95.5989	4.40109
EIO.MW17.33	10	B	0	0.000264767	0	0	0.0681893	0	0	0.000382624	0.0014418	0.000181026	0	0.0029875	0.0029875	0	0.0684911	0.000382624	0.001648	0.0718612	4.15732	0	95.3102	0.532449	2.24189	0.532449	99.4676	95.8427	4.15732
EIO.MW17.40	01	A	0	7.92899e-05	0	0	0.0107667	0	0	0.00127645	0.000174597	0	0.000156968	0.000518156	0.000518156	0.000156968	0.0108571	0.00127645	0.000174597	0.0128086	4.04536	1.22548	84.7636	9.96553	1.34479	11.191	88.809	94.7292	5.27085
EIO.MW17.40	01	B	0	0.000118401	0	0	0.0138491	0	0	0.00149348	0.000213294	0	0.000163906	0.000604353	0.000604353	0.000163906	0.0139841	0.00149348	0.000213294	0.0162458	3.72005	1.00891	86.078	9.19299	1.2959	10.2019	89.7981	95.271	4.72896
EIO.MW17.40	02	A	0	0	0	0	0.0194191	0	0	0.000299546	0.0003181	0	0	0.00086586	0.00086586	0	0.0194191	0.000299546	0.0003181	0.0205845	4.20637	0	94.3384	1.4552	1.52182	1.4552	98.5448	95.7936	4.20637
EIO.MW17.40	02	B	0	0	0	0	0.0183405	0	0	0.000296688	0.00027657	0	0	0.000790822	0.000790822	0	0.0183405	0.000296688	0.00027657	0.019428	4.07053	0	94.4024	1.52712	1.40359	1.52712	98.4729	95.9295	4.07053
EIO.MW17.40	03	A	0	0	0	0	0.0129878	0	0	0.00103094	0.000129584	0	8.88953e-05	0.000530565	0.000530565	8.88953e-05	0.0129878	0.00103094	0.000129584	0.0146382	3.62452	0.607283	88.7254	7.04279	0.877477	7.65008	92.3499	95.7682	4.2318
EIO.MW17.40	03	B	0	0	0	0	0.0112705	0	0	0.000944146	0.000106583	0	9.03389e-05	0.000439738	0.000439738	9.03389e-05	0.0112705	0.000944146	0.000106583	0.0127447	3.45036	0.708836	88.4326	7.40815	0.829362	8.11699	91.883	95.8408	4.1592
EIO.MW17.40	04	A	0	0	0	0	0.00534595	0	0	0.000177326	4.10259e-05	0	0.000220717	0.00358074	0.00358074	0.000220717	0.00534595	0.000177326	4.10259e-05	0.00932473	38.4004	2.36701	57.3309	1.90167	0.438042	4.26868	95.7313	59.2326	40.7674
EIO.MW17.40	04	B	0	0	0	0	0.00629148	0	0	0.000193177	5.30928e-05	0	0.00026019	0.00428377	0.00428377	0.00026019	0.00629148	0.000193177	5.30928e-05	0.0110286	38.8423	2.35923	57.0469	1.7516	0.479103	4.11082	95.8892	58.7985	41.2015
EIO.MW17.40	05	A	0	0	0	0	0.00862262	0	0	0.000670005	0.000310534	0	9.88274e-05	0.000374536	0.000374536	9.88274e-05	0.00862262	0.000670005	0.000310534	0.00976599	3.83511	1.01196	88.2923	6.86059	3.08176	7.87255	92.1275	95.1529	4.84706
EIO.MW17.40	05	B	0	0	0	0	0.00845618	0	0	0.000711148	0.000260699	0	0.000114275	0.000321909	0.000321909	0.000114275	0.00845618	0.000711148	0.000260699	0.00960351	3.35199	1.18992	88.053	7.40509	2.64288	8.59501	91.405	95.4581	4.54191
EIO.MW17.40	06	A	0	7.42396e-05	0	0	0.0251854	0	0	0.00117497	0.000465469	0	0.000110235	0.000844577	0.000844577	0.000110235	0.0252701	0.00117497	0.000465469	0.0273998	3.08242	0.402321	92.227	4.28823	1.67043	4.69055	95.3095	96.5153	3.48474
EIO.MW17.40	06	B	0	8.00631e-05	0	0	0.0234008	0	0	0.00109401	0.000366969	0	8.20922e-05	0.000748795	0.000748795	8.20922e-05	0.023492	0.00109401	0.000366969	0.0254169	2.94605	0.322982	92.4267	4.30427	1.42325	4.62725	95.3728	96.731	3.26903
EIO.MW17.40	07	A	0	0	0	0	0.00993497	0	0	0.000954919	0.000141123	0	0.000861109	0.00380627	0.00380627	0.000861109	0.00993497	0.000954919	0.000141123	0.0155573	24.4662	5.53509	63.8606	6.13809	0.898962	11.6732	88.3268	69.9987	30.0013
EIO.MW17.40	07	B	0	0	0	0	0.00978355	0	0	0.000898335	0.000172349	0	0.00087931	0.00402941	0.00402941	0.00087931	0.00978355	0.000898335	0.000172349	0.0155906	25.8451	5.64	62.7529	5.76203	1.09338	11.402	88.598	68.5149	31.4851
EIO.MW17.40	08	A	0	6.43192e-05	0	0	0.0119852	0	0	0.000636309	6.10821e-05	0	8.07595e-05	0.000549371	0.000549371	8.07595e-05	0.0120585	0.000636309	6.10821e-05	0.0133249	4.12288	0.606078	90.4957	4.77533	0.456312	5.38141	94.6186	95.271	4.72896
EIO.MW17.40	08	B	0	8.73032e-05	0	0	0.0106409	0	0	0.000548201	5.02055e-05	0	7.24124e-05	0.00032221	0.00032221	7.24124e-05	0.0107404	0.000548201	5.02055e-05	0.0116832	2.75789	0.6198	91.9301	4.69222	0.427885	5.31202	94.688	96.6223	3.37769
EIO.MW17.48	01	A	0	0	6.85353e-05	0	0.000110872	0	0	0	0.00364312	0.00018771	0.000596835	0.0327698	0.0328479	0.000596835	0.000110872	0	0.00385694	0.0335556	97.8909	1.77864	0.330413	0	10.3092	1.77864	98.2214	0.330413	99.6696
EIO.MW17.48	01	B	0	0	9.88403e-05	0	0.000107089	0	0	0	0.00402958	0.000201577	0.000693876	0.0341945	0.0343072	0.000693876	0.000107089	0	0.00425918	0.0351082	97.7186	1.97639	0.305025	0	10.8191	1.97639	98.0236	0.305025	99.695
EIO.MW17.48	02	A	0	0	0.000163695	9.89926e-05	8.77199e-05	0	0	0	0.000191508	0.000255265	0.000432294	0.0249143	0.0251009	0.000432294	8.77199e-05	0	0.00048227	0.0256209	97.9704	1.68727	0.342376	0	1.84755	1.68727	98.3127	0.342376	99.6576
EIO.MW17.48	02	B	0	0	0.000178742	9.26195e-05	0.000125645	0	0	0	0.00136155	0.000390465	0.000792534	0.0430058	0.0432095	0.000792534	0.000125645	0	0.00180632	0.0441277	97.9193	1.796	0.28473	0	3.93241	1.796	98.204	0.28473	99.7153
EIO.MW17.48	03	A	0	0	7.62797e-05	0	0.000112454	0	0	4.31972e-05	0.00149203	0.00013324	0.00418597	0.0293389	0.0294259	0.00418597	0.000112454	4.31972e-05	0.0016438	0.0337675	87.1426	12.3964	0.333025	0.127926	4.64202	12.5244	87.4756	0.460951	99.539
EIO.MW17.48	03	B	0	0	0.000101312	0	0.00011542	0	0	4.29792e-05	0.000615963	0.00012568	0.00371643	0.0274349	0.0275504	0.00371643	0.00011542	4.29792e-05	0.000759121	0.0314252	87.6697	11.8263	0.367284	0.136767	2.35867	11.9631	88.0369	0.50405	99.4959
EIO.MW17.48	04	A	0	0	0	0	8.20993e-05	0	0	4.26944e-05	0.00176041	8.4814e-05	0.00465251	0.0229765	0.0229765	0.00465251	8.20993e-05	4.26944e-05	0.00185702	0.0277538	82.7868	16.7635	0.295813	0.153833	6.27143	16.9174	83.0826	0.449646	99.5504
EIO.MW17.48	04	B	0	0	0	0	7.89713e-05	0	0	3.99662e-05	0.000967029	6.9719e-05	0.00386385	0.0227728	0.0227728	0.00386385	7.89713e-05	3.99662e-05	0.00104644	0.0267555	85.1142	14.4413	0.295159	0.149375	3.76391	14.5907	85.4093	0.444534	99.5555
EIO.MW17.48	05	A	0	0	6.73451e-05	0	8.43008e-05	0	0	4.07378e-05	0.00059464	0.000112028	0.00432187	0.0225597	0.0226365	0.00432187	8.43008e-05	4.07378e-05	0.000722246	0.0270834	83.5807	15.9576	0.311263	0.150416	2.59748	16.1081	83.8919	0.46168	99.5383
EIO.MW17.48	05	B	0	0	7.09754e-05	0	7.10365e-05	0	0	3.86147e-05	0.000570399	0.000126524	0.0045079	0.0213765	0.0214574	0.0045079	7.10365e-05	3.86147e-05	0.000714518	0.026075	82.2913	17.2882	0.272431	0.148091	2.66716	17.4363	82.5637	0.420522	99.5795
EIO.MW17.48	06	A	0	0	6.50242e-05	0	0.000156036	0	0	3.52449e-05	0.0023464	0.000101552	0.00141399	0.0417229	0.0417971	0.00141399	0.000156036	3.52449e-05	0.00246207	0.0434023	96.3014	3.25786	0.359511	0.0812052	5.36816	3.33906	96.6609	0.440716	99.5593
EIO.MW17.48	06	B	0	0	6.23036e-05	0	0.000133111	0	0	4.94317e-05	0.00192819	0.000110258	0.00121711	0.037274	0.037345	0.00121711	0.000133111	4.94317e-05	0.00205378	0.0387447	96.3875	3.14136	0.34356	0.127583	5.03396	3.26894	96.7311	0.471144	99.5289
EIO.MW17.48	07	A	0	0	0.000108286	0	0.000125757	0	0	0	0.00279726	0.000189374	0.000819127	0.0360407	0.0361641	0.000819127	0.000125757	0	0.00301297	0.037109	97.4538	2.20735	0.338884	0	7.50952	2.20735	97.7926	0.338884	99.6611
EIO.MW17.48	07	B	0	0	0.000111817	0	8.2372e-05	0	0	0	0.00130605	0.000165708	0.000555588	0.0274376	0.0275651	0.000555588	8.2372e-05	0	0.0014948	0.028203	97.738	1.96996	0.292068	0	5.03338	1.96996	98.03	0.292068	99.7079
EIO.MW17.48	08	A	0	0	0.000133649	0	0.00011921	0	0	0	0.00133937	0.000156197	0.000596791	0.035004	0.0351563	0.000596791	0.00011921	0	0.00151729	0.0358723	98.004	1.66365	0.332317	0	4.05805	1.66365	98.3363	0.332317	99.6677
EIO.MW17.48	08	B	0	0	0.000126056	0	9.3964e-05	0	0	0	0.00061909	0.000112307	0.00049229	0.029062	0.0292057	0.00049229	9.3964e-05	0	0.000747014	0.029792	98.0322	1.65242	0.3154	0	2.4461	1.65242	98.3476	0.3154	99.6846
EIO.MW17.48	09	A	0	0	7.18148e-05	0	7.82758e-05	0	0	4.08906e-05	0.000962451	0.000165863	0.00386358	0.0195409	0.0196227	0.00386358	7.82758e-05	4.08906e-05	0.00115138	0.0236055	83.1279	16.3673	0.3316	0.173225	4.65075	16.5405	83.4595	0.504824	99.4952
EIO.MW17.48	09	B	0	0	8.34064e-05	0	5.22578e-05	0	0	2.6233e-05	0.000335276	0.00013139	0.00323151	0.0163973	0.0164924	0.00323151	5.22578e-05	2.6233e-05	0.000484937	0.0198024	83.2848	16.3188	0.263897	0.132474	2.39035	16.4513	83.5487	0.396371	99.6036
EIO.MW17.48	10	A	0	0	8.24844e-05	0	8.21481e-05	0	0	8.3246e-05	0.000338186	0.000123298	0.0118594	0.0247615	0.0248555	0.0118594	8.21481e-05	8.3246e-05	0.00047863	0.0368803	67.3951	32.1564	0.222743	0.225719	1.28117	32.3822	67.6178	0.448462	99.5515
EIO.MW17.48	10	B	0	0	9.51556e-05	0	8.88928e-05	0	0	7.11418e-05	0.000317795	0.000125041	0.0118709	0.0267418	0.0268503	0.0118709	8.88928e-05	7.11418e-05	0.000460224	0.0388812	69.0572	30.5312	0.228627	0.182972	1.16982	30.7142	69.2858	0.411599	99.5884
EIO.MW17.10	01	A	0	0	0	0	0.0124717	0	0	0.000107799	0.00011821	0	0	0.00772162	0.00772162	0	0.0124717	0.000107799	0.00011821	0.0203011	38.0354	0	61.4336	0.530999	0.578911	0.530999	99.469	61.9646	38.0354
EIO.MW17.10	01	B	0	0	0	0	0.0104358	0	0	0.000100939	0.000111035	0	0	0.00639343	0.00639343	0	0.0104358	0.000100939	0.000111035	0.0169302	37.7634	0	61.6404	0.596208	0.651569	0.596208	99.4038	62.2366	37.7634
EIO.MW17.10	02	A	0	0	6.74804e-05	0	0.021714	0	0	0.000266394	0.00022912	0.000255179	0.000398565	0.0148757	0.0149526	0.000398565	0.021714	0.000266394	0.000519784	0.0373316	40.0535	1.06764	58.1653	0.71359	1.37322	1.78123	98.2188	58.8789	41.1211
EIO.MW17.10	02	B	0	0	9.43236e-05	0	0.0172752	0	0	0.000187125	0.000151857	0.000217438	0.000365684	0.0120886	0.0121961	0.000365684	0.0172752	0.000187125	0.000399532	0.0300241	40.6209	1.21797	57.5379	0.623247	1.31323	1.84121	98.1588	58.1611	41.8389
EIO.MW17.10	03	A	0	0	9.42345e-05	0	0.0224733	0	0	0.000257072	0.000382348	0.000182371	0.000590451	0.0209109	0.0210183	0.000590451	0.0224733	0.000257072	0.000590079	0.0443392	47.4035	1.33167	50.685	0.579786	1.31335	1.91145	98.0885	51.2648	48.7352
EIO.MW17.10	03	B	0	0	7.80405e-05	0	0.0169451	0	0	0.000169701	0.00028056	0.000175533	0.000568954	0.0155735	0.0156624	0.000568954	0.0169451	0.000169701	0.000480503	0.0333462	46.9693	1.70621	50.8156	0.508906	1.42049	2.21511	97.7849	51.3245	48.6755
EIO.MW17.10	04	A	0	0	5.48944e-05	0	0.00498754	0	0	5.97697e-05	3.45797e-05	0	0.000157765	0.00432687	0.00438945	0.000157765	0.00498754	5.97697e-05	3.45797e-05	0.00959453	45.7495	1.64432	51.9832	0.622956	0.359117	2.26728	97.7327	52.6062	47.3938
EIO.MW17.10	04	B	0	0	5.31455e-05	0	0.00287122	0	0	3.24387e-05	2.01258e-05	0	0.000100389	0.00282502	0.0028856	0.000100389	0.00287122	3.24387e-05	2.01258e-05	0.00588965	48.9945	1.7045	48.7503	0.550774	0.340551	2.25528	97.7447	49.301	50.699
EIO.MW17.10	05	A	0	0.000266308	0	8.19514e-05	0.0390015	0	0	0.000201781	0.000372561	0.000166027	0	0.00153154	0.00153154	0	0.0393051	0.000201781	0.000561676	0.0410384	3.73197	0	95.7763	0.491687	1.35018	0.491687	99.5083	96.268	3.73197
EIO.MW17.10	05	B	0	0.000233748	0	0.000105778	0.034152	0	0	0.000185268	0.000287913	0.000132917	0	0.00148439	0.00148439	0	0.0344184	0.000185268	0.000439314	0.0360881	4.11324	0	95.3734	0.513378	1.2027	0.513378	99.4866	95.8868	4.11324
EIO.MW17.10	06	A	0	0	7.20801e-05	0	0.0118503	0	0	8.29901e-05	0.000202196	0	0.000204012	0.0101534	0.0102356	0.000204012	0.0118503	8.29901e-05	0.000202196	0.0223729	45.75	0.91187	52.9672	0.37094	0.895658	1.28281	98.7172	53.3381	46.6619
EIO.MW17.10	06	B	0	0	5.76529e-05	0	0.0139663	0	0	0.0001031	0.000186795	0	0.000261159	0.0112414	0.0113071	0.000261159	0.0139663	0.0001031	0.000186795	0.0256376	44.1035	1.01866	54.4757	0.402143	0.723327	1.4208	98.5792	54.8779	45.1221
EIO.MW17.10	07	A	0	0	0	0	0.0130387	0	0	9.87492e-05	0.000161747	0	0.000179449	0.0124606	0.0124606	0.000179449	0.0130387	9.87492e-05	0.000161747	0.0257775	48.3392	0.696144	50.5816	0.383083	0.623561	1.07923	98.9208	50.9647	49.0353
EIO.MW17.10	07	B	0	0	0	0	0.0118469	0	0	9.91248e-05	0.000154074	0	0.000292737	0.0114042	0.0114042	0.000292737	0.0118469	9.91248e-05	0.000154074	0.023643	48.2351	1.23816	50.1075	0.419257	0.64745	1.65741	98.3426	50.5268	49.4732
EIO.MW17.10	08	A	0	0.000125249	0	0	0.0311284	0	0	0.000257341	0.000241986	0	0	0.00148719	0.00148719	0	0.0312711	0.000257341	0.000241986	0.0330157	4.50451	0	94.716	0.779451	0.72761	0.779451	99.2205	95.4955	4.50451
EIO.MW17.10	08	B	0	0.000153911	0	0	0.043778	0	0	0.000362086	0.000558648	0	0	0.00195745	0.00195745	0	0.0439535	0.000362086	0.000558648	0.046273	4.23021	0	94.9873	0.7825	1.19289	0.7825	99.2175	95.7698	4.23021
EIO.MW17.10	09	A	0	0.000112313	0	0	0.0297249	0	0	0.00022891	0.000510239	0.000401166	0.00022703	0.0193307	0.0193307	0.00022703	0.0298529	0.00022891	0.000967191	0.0496395	38.9421	0.457357	60.1394	0.461145	1.91119	0.918501	99.0815	60.6006	39.3994
EIO.MW17.10	09	B	0	0.000116859	0	0	0.0239538	0	0	0.000197571	0.000324692	0.000304259	0.000189007	0.0151223	0.0151223	0.000189007	0.024087	0.000197571	0.000671262	0.0395959	38.1916	0.477339	60.832	0.498968	1.66702	0.976307	99.0237	61.331	38.669
EIO.MW17.10	10	A	0	0	5.10017e-05	0	0.00607511	0	0	6.05842e-05	7.83286e-05	0	6.25461e-05	0.00478781	0.00484595	6.25461e-05	0.00607511	6.05842e-05	7.83286e-05	0.0110442	43.8778	0.566326	55.0073	0.548562	0.704234	1.11489	98.8851	55.5559	44.4441
EIO.MW17.10	10	B	0	0	6.05526e-05	0	0.00821517	0	0	7.01198e-05	0.000123426	0	7.17202e-05	0.00624357	0.00631259	7.17202e-05	0.00821517	7.01198e-05	0.000123426	0.0146696	43.0318	0.488903	56.0013	0.477994	0.834355	0.966897	99.0331	56.4793	43.5207
EIO.MW17.18	01	A	0	9.76962e-05	0	0.000112144	0.0456655	0	0	0.000350541	0.0103753	0.000212942	0	0.00208531	0.00208531	0	0.0457769	0.000350541	0.0106179	0.0482127	4.32522	0	94.9477	0.727071	18.0482	0.727071	99.2729	95.6748	4.32522
EIO.MW17.18	01	B	0	0.000113456	0	0.000112295	0.0512535	0	0	0.00037401	0.0142476	0.000220617	0	0.00222976	0.00222976	0	0.0513828	0.00037401	0.0144989	0.0539866	4.13022	0	95.177	0.692783	21.1708	0.692783	99.3072	95.8698	4.13022
EIO.MW17.18	02	A	0	0	6.38498e-05	0.000150525	4.88372e-05	0	0	0	0.00266234	0.00055944	0.000255465	0.0111535	0.0112263	0.000255465	4.88372e-05	0	0.00329957	0.0115306	97.3609	2.21554	0.423544	0	22.249	2.21554	97.7845	0.423544	99.5765
EIO.MW17.18	02	B	0	0	7.26406e-05	0.000137837	4.02836e-05	0	0	0	0.00226777	0.000472983	0.000254818	0.0113151	0.0113979	0.000254818	4.02836e-05	0	0.00280652	0.011693	97.4763	2.17924	0.344511	0	19.356	2.17924	97.8208	0.344511	99.6555
EIO.MW17.18	03	A	0	6.54907e-05	0	0.000149617	0.019542	0	0	0.000831806	0.00166745	0.000891003	0.000665652	0.00776857	0.00776857	0.000665652	0.0196167	0.000831806	0.00268236	0.0288827	26.897	2.30468	67.9184	2.87994	8.49788	5.18462	94.8154	70.7984	29.2016
EIO.MW17.18	03	B	0	6.85335e-05	0	0.000145526	0.0183098	0	0	0.000731042	0.00170671	0.000866109	0.000641293	0.00705687	0.00705687	0.000641293	0.0183879	0.000731042	0.00269326	0.0268171	26.3148	2.39136	68.5678	2.72602	9.12647	5.11738	94.8826	71.2939	28.7061
EIO.MW17.18	04	A	0	9.91865e-05	9.5266e-05	6.87729e-05	0.0232908	0	0	0.000103009	0.00386477	0.00148923	0.00013814	0.0163268	0.0164354	0.00013814	0.0234039	0.000103009	0.00556109	0.0400804	41.006	0.344657	58.3923	0.257006	12.1843	0.601662	99.3983	58.6493	41.3507
EIO.MW17.18	04	B	0	8.08859e-05	9.15018e-05	8.69154e-05	0.0215711	0	0	9.60031e-05	0.00361566	0.00134303	0.000190869	0.0151974	0.0153017	0.000190869	0.0216633	9.60031e-05	0.00514545	0.0372519	41.0764	0.512374	58.1535	0.257714	12.1363	0.770088	99.2299	58.4112	41.5888
EIO.MW17.18	05	A	0	0	7.15583e-05	0	0.000103879	0	0	0	0.00243718	0.000135787	0.000336257	0.023532	0.0236136	0.000336257	0.000103879	0	0.00259185	0.0240537	98.1702	1.39794	0.431863	0	9.72712	1.39794	98.6021	0.431863	99.5681
EIO.MW17.18	05	B	0	0	6.23596e-05	0	8.34306e-05	0	0	0	0.00223968	0.000126959	0.000344263	0.0228716	0.0229427	0.000344263	8.34306e-05	0	0.00238429	0.0233704	98.1699	1.47307	0.356993	0	9.2577	1.47307	98.5269	0.356993	99.643
EIO.MW17.18	06	A	0	0	0	0	0.0078195	0	0	8.49161e-05	0.00146514	0.00067152	0.000139173	0.00732535	0.00732535	0.000139173	0.0078195	8.49161e-05	0.00223004	0.0153689	47.6633	0.905548	50.8786	0.552518	12.6714	1.45807	98.5419	51.4311	48.5689
EIO.MW17.18	06	B	0	0	0	0	0.010054	0	0	9.73012e-05	0.00194004	0.000838977	0.000118796	0.0106355	0.0106355	0.000118796	0.010054	9.73012e-05	0.00289568	0.0209055	50.8739	0.568253	48.0924	0.465433	12.1661	1.03369	98.9663	48.5579	51.4421
EIO.MW17.18	07	A	0	0	0.000114229	7.23559e-05	0.000120926	0	0	4.54976e-05	0.00276079	0.000580291	0.00148681	0.0244298	0.02456	0.00148681	0.000120926	4.54976e-05	0.00342178	0.0262132	93.6931	5.67197	0.461317	0.173568	11.5464	5.84554	94.1545	0.634885	99.3651
EIO.MW17.18	07	B	0	0	0.000104451	8.02934e-05	9.1388e-05	0	0	3.05349e-05	0.00283252	0.000503854	0.00147786	0.0244945	0.0246136	0.00147786	9.1388e-05	3.05349e-05	0.00340644	0.0262134	93.8971	5.63779	0.348631	0.116486	11.5005	5.75428	94.2457	0.465117	99.5349
EIO.MW17.18	08	A	0	8.23316e-05	0	0	0.0154755	0	0	9.17687e-05	0	0	0	0.000592386	0.000592386	0	0.0155693	9.17687e-05	0	0.0162535	3.64467	0	95.7907	0.564609	0	0.564609	99.4354	96.3553	3.64467
EIO.MW17.18	08	B	0	9.40565e-05	0	0	0.0135399	0	0	7.71705e-05	0	0	0	0.000505634	0.000505634	0	0.0136471	7.71705e-05	0	0.0142299	3.55332	0	95.9044	0.542312	0	0.542312	99.4577	96.4467	3.55332
EIO.MW17.18	09	A	0	0.000104635	0	0.000121285	0.0146848	0	0	0.000131986	7.79087e-05	0.000176279	0.000193185	0.00668952	0.00668952	0.000193185	0.014804	0.000131986	0.000278701	0.0218187	30.6595	0.885408	67.8501	0.60492	1.26124	1.49033	98.5097	68.4551	31.5449
EIO.MW17.18	09	B	0	0.000104213	0	0.000131821	0.0147258	0	0	0.000118739	6.53388e-05	0.000146864	0.000169383	0.00641241	0.00641241	0.000169383	0.0148446	0.000118739	0.000232625	0.0215451	29.7627	0.786179	68.9	0.551117	1.06818	1.3373	98.6627	69.4511	30.5489
EIO.MW17.18	10	A	0	0.000114858	0.000119885	0.000252799	0.0171922	0	0	0.0001845	0.00380651	0.000659001	0.000312686	0.0127813	0.012918	0.000312686	0.0173232	0.0001845	0.00455716	0.0307383	42.0256	1.01725	56.3569	0.600228	12.9115	1.61748	98.3825	56.9572	43.0428
EIO.MW17.18	10	B	0	0.000112807	0.000129119	0.000273818	0.0163478	0	0	0.000176682	0.00401743	0.000735937	0.000285256	0.0137128	0.0138599	0.000285256	0.0164764	0.000176682	0.0048557	0.0307983	45.0024	0.926206	53.4977	0.573676	13.619	1.49988	98.5001	54.0714	45.9286
EIO.MW17.19	01	A	0	0.000118147	0	0.000382536	0.0336817	0	0	0.000611255	0.0132101	0.000477304	0	0.00163535	0.00163535	0	0.0338164	0.000611255	0.0137538	0.036063	4.53472	0	93.7703	1.69497	27.6088	1.69497	98.305	95.4653	4.53472
EIO.MW17.19	01	B	0	0.000159542	0	0.000419098	0.0318988	0	0	0.000594929	0.0129462	0.000225072	0	0.0014463	0.0014463	0	0.0320807	0.000594929	0.0132026	0.0341219	4.23862	0	94.0178	1.74354	27.898	1.74354	98.2565	95.7614	4.23862
EIO.MW17.19	02	A	0	0.000173563	6.40502e-05	0.000130132	0.0583532	0	0	0.00146562	0.0183935	0.000186128	0.000135836	0.00241489	0.0024879	0.000135836	0.058551	0.00146562	0.0186056	0.0626404	3.97172	0.21685	93.4717	2.33974	22.9003	2.55659	97.4434	95.8114	4.18857
EIO.MW17.19	02	B	0	0.000189836	5.10561e-05	0.000241719	0.0508457	0	0	0.00127882	0.0161133	0.000175847	9.26433e-05	0.00209987	0.00215807	9.26433e-05	0.0510621	0.00127882	0.0163136	0.0545916	3.95312	0.169702	93.5347	2.34251	23.0076	2.51222	97.4878	95.8772	4.12282
EIO.MW17.19	04	A	0	0.000169804	0	0.00017565	0.0463548	0	0	0.000989609	0.0085151	0.000305809	0.000146238	0.0020148	0.0020148	0.000146238	0.0465483	0.000989609	0.00886344	0.049699	4.05402	0.294248	93.6605	1.99121	15.135	2.28545	97.7145	95.6517	4.34827
EIO.MW17.19	04	B	0	0.000146855	0	0.000159666	0.0369122	0	0	0.000792639	0.00605669	0.000138915	0.00012716	0.00173213	0.00173213	0.00012716	0.0370796	0.000792639	0.00621493	0.0397315	4.35957	0.320048	93.3254	1.99499	13.5265	2.31504	97.685	95.3204	4.67962
EIO.MW17.19	05	A	0	0.0001251	0	0.000180383	0.0395391	0	0	0.000311085	0.00430735	9.97958e-05	0	0.00172054	0.00172054	0	0.0396817	0.000311085	0.00442102	0.0417133	4.12468	0	95.1295	0.745768	9.58293	0.745768	99.2542	95.8753	4.12468
EIO.MW17.19	05	B	0	0.000123954	0	0.000171211	0.0348885	0	0	0.000289258	0.00388711	0.000121505	0	0.0015646	0.0015646	0	0.0350297	0.000289258	0.00402551	0.0368836	4.242	0	94.9738	0.784245	9.84013	0.784245	99.2158	95.758	4.242
EIO.MW17.19	06	A	0	0.000113729	0	0.000135381	0.034045	0	0	0.00151142	0.00598683	0.000129556	0.000178641	0.00135554	0.00135554	0.000178641	0.0341746	0.00151142	0.0061344	0.0372202	3.64194	0.479958	91.8174	4.06074	14.1494	4.5407	95.4593	95.8781	4.1219
EIO.MW17.19	06	B	0	8.9459e-05	0	9.04964e-05	0.0367647	0	0	0.00161898	0.00663428	0.00014127	0.00021185	0.00149797	0.00149797	0.00021185	0.0368666	0.00161898	0.00679519	0.0401954	3.72673	0.527049	91.7184	4.02778	14.4607	4.55483	95.4452	95.7462	4.25378
EIO.MW17.19	07	A	0	9.9153e-05	0	0.000238693	0.0236392	0	0	0.00068446	0.00349606	0.000103605	9.96386e-05	0.00107509	0.00107509	9.96386e-05	0.0237522	0.00068446	0.00361407	0.0256114	4.1977	0.38904	92.7408	2.67248	12.3661	3.06152	96.9385	95.4133	4.58674
EIO.MW17.19	07	B	0	9.03354e-05	0	0.00030978	0.0146712	0	0	0.000474315	0.00106728	5.88102e-05	6.94983e-05	0.000704375	0.000704375	6.94983e-05	0.0147742	0.000474315	0.00113427	0.0160224	4.3962	0.433758	92.2097	2.96033	6.61128	3.39409	96.6059	95.17	4.82995
EIO.MW17.19	08	A	0	0	0	9.47959e-05	0.0189938	0	0	0.000850679	0.00210568	0	0.000133343	0.000768283	0.000768283	0.000133343	0.0189938	0.000850679	0.00210568	0.0207461	3.70327	0.64274	91.5536	4.10043	9.21454	4.74318	95.2568	95.654	4.34601
EIO.MW17.19	08	B	0	0	0	0.000117781	0.0250483	0	0	0.000965172	0.00244202	0	0.00021649	0.00112522	0.00112522	0.00021649	0.0250483	0.000965172	0.00244202	0.0273552	4.11336	0.791404	91.5669	3.5283	8.19547	4.3197	95.6803	95.0952	4.90476
EIO.MW17.19	09	A	0	9.16183e-05	0	0.000161977	0.0183892	0	0	0.00037465	0.00416099	0.000108617	9.2257e-05	0.000889795	0.000889795	9.2257e-05	0.0184937	0.00037465	0.00428471	0.0198504	4.48251	0.464762	93.1654	1.88737	17.753	2.35213	97.6479	95.0527	4.94727
EIO.MW17.19	09	B	0	8.98711e-05	0	0.000153481	0.0225352	0	0	0.000456853	0.00445212	7.45651e-05	9.5258e-05	0.000955886	0.000955886	9.5258e-05	0.0226377	0.000456853	0.00453706	0.0241456	3.95884	0.394514	93.7546	1.89207	15.8181	2.28658	97.7134	95.6467	4.35335
EIO.MW17.19	10	A	0	0.000153374	0	0.000141663	0.0340592	0	0	0.000624403	0.000920577	0	6.71946e-05	0.00119786	0.00119786	6.71946e-05	0.034234	0.000624403	0.000920577	0.0361235	3.31603	0.186014	94.7694	1.72853	2.48509	1.91454	98.0855	96.498	3.50204
EIO.MW17.19	10	B	0	0.000214508	0	0.000195425	0.0269895	0	0	0.000475129	0.00088151	0	7.49472e-05	0.001044	0.001044	7.49472e-05	0.027234	0.000475129	0.00088151	0.0288281	3.62148	0.25998	94.4704	1.64815	2.96709	1.90813	98.0919	96.1185	3.88146
EIO.MW15.F	01	A	0	0	0.000266598	7.70351e-05	0.000141054	0	0	0	0.000678902	0.000114184	0.000276247	0.0474669	0.0477708	0.000276247	0.000141054	0	0.000808965	0.0481881	99.134	0.573269	0.292716	0	1.65105	0.573269	99.4267	0.292716	99.7073
EIO.MW15.F	01	B	0	0	0.0002572	7.60817e-05	0.000136659	0	0	0	0.000425139	0.000125935	0.0002333	0.0459678	0.046261	0.0002333	0.000136659	0	0.000568587	0.046631	99.2066	0.500312	0.293064	0	1.20464	0.500312	99.4997	0.293064	99.7069
EIO.MW15.F	02	A	0	0	0.000165852	0	0.000111488	0	0	0	8.30162e-05	8.13983e-05	0.000244642	0.0311409	0.03133	0.000244642	0.000111488	0	0.000175734	0.0316861	98.8761	0.77208	0.351853	0	0.55155	0.77208	99.2279	0.351853	99.6481
EIO.MW15.F	02	B	0	0	0.000206912	0	0.000139982	0	0	0	0.000183875	7.36327e-05	0.000304996	0.0420276	0.0422635	0.000304996	0.000139982	0	0.000267747	0.0427085	98.9581	0.714135	0.327761	0	0.623013	0.714135	99.2859	0.327761	99.6722
EIO.MW15.F	03	A	0	0	0.000121001	0	7.35847e-05	0	0	0	0.000207151	0.00010557	0.000145499	0.0208925	0.0210304	0.000145499	7.35847e-05	0	0.000327401	0.0212495	98.969	0.684718	0.34629	0	1.51737	0.684718	99.3153	0.34629	99.6537
EIO.MW15.F	03	B	0	0	0.000115441	0	7.49162e-05	0	0	0	0.000359728	7.87181e-05	0.000134572	0.0200558	0.0201874	0.000134572	7.49162e-05	0	0.000449393	0.0203969	98.9729	0.659769	0.367293	0	2.15575	0.659769	99.3402	0.367293	99.6327
EIO.MW15.F	04	A	0	0	0.000126562	7.98304e-05	3.59507e-05	0	0	0	5.27745e-05	7.12888e-05	7.77797e-05	0.01258	0.0127243	7.77797e-05	3.59507e-05	0	0.000133977	0.012838	99.1141	0.605855	0.280033	0	1.03282	0.605855	99.3941	0.280033	99.72
EIO.MW15.F	04	B	0	0	8.67175e-05	6.7646e-05	4.42681e-05	0	0	0	5.0912e-05	9.18751e-05	7.47611e-05	0.0100543	0.0101532	7.47611e-05	4.42681e-05	0	0.000155563	0.0102722	98.8413	0.727799	0.430949	0	1.49182	0.727799	99.2722	0.430949	99.5691
EIO.MW15.F	05	A	0	0	0.000133299	0	9.90787e-05	0	0	0	7.51464e-05	6.8698e-05	0.000333703	0.0269435	0.0270954	0.000333703	9.90787e-05	0	0.000153398	0.0275282	98.4279	1.21222	0.359917	0	0.554149	1.21222	98.7878	0.359917	99.6401
EIO.MW15.F	05	B	0	0	0.000271364	0	0.000151512	0	0	0	8.75602e-05	0.000115619	0.000589749	0.0453273	0.0456367	0.000589749	0.000151512	0	0.000219257	0.0463779	98.4017	1.27162	0.326689	0	0.470537	1.27162	98.7284	0.326689	99.6733
EIO.MW15.F	06	A	0	0	0.000517129	0.000135024	0.000158569	0	0	0	9.00131e-05	0.000122396	0.000341152	0.0557357	0.0563251	0.000341152	0.000158569	0	0.00022943	0.0568249	99.1206	0.600357	0.279049	0	0.402125	0.600357	99.3996	0.279049	99.721
EIO.MW15.F	06	B	0	0	0.000390913	9.65639e-05	0.000126577	0	0	0	0.00013623	0.000107045	0.00030417	0.0467556	0.0472012	0.00030417	0.000126577	0	0.000258161	0.047632	99.0957	0.638583	0.26574	0	0.539069	0.638583	99.3614	0.26574	99.7343
EIO.MW15.F	07	A	0	0	0.000139649	0.000143405	7.13258e-05	0	0	0	3.73672e-05	0.00013234	8.27127e-05	0.018724	0.0188832	8.27127e-05	7.13258e-05	0	0.000188111	0.0190372	99.1909	0.434478	0.374664	0	0.978452	0.434478	99.5655	0.374664	99.6253
EIO.MW15.F	07	B	0	0	0.000123882	0.000130514	5.86796e-05	0	0	0	2.84321e-05	0.00013458	7.20857e-05	0.0172199	0.0173611	7.20857e-05	5.86796e-05	0	0.000181727	0.0174919	99.2524	0.412109	0.335468	0	1.02824	0.412109	99.5879	0.335468	99.6645
EIO.MW15.F	08	A	0	0	0.000135148	0	9.25381e-05	0	0	0	0.000320429	9.45522e-05	0.000131272	0.0279948	0.0281488	0.000131272	9.25381e-05	0	0.00042813	0.0283726	99.2112	0.46267	0.326153	0	1.48652	0.46267	99.5373	0.326153	99.6738
EIO.MW15.F	08	B	0	0	8.42921e-05	0	7.07724e-05	0	0	0	0.000185416	8.24617e-05	9.13896e-05	0.0179018	0.0179979	9.13896e-05	7.07724e-05	0	0.000279344	0.01816	99.107	0.503246	0.389715	0	1.51494	0.503246	99.4968	0.389715	99.6103
EIO.MW15.F	09	A	0	0	0.00032555	0.000103861	0.000135687	0	0	0	8.08018e-05	9.82869e-05	0.000438221	0.0437824	0.0441535	0.000438221	0.000135687	0	0.000192757	0.0447274	98.7169	0.979761	0.303365	0	0.42911	0.979761	99.0202	0.303365	99.6966
EIO.MW15.F	09	B	0	0	0.000309377	0.000104969	0.000124672	0	0	0	9.32421e-05	6.123e-05	0.00044747	0.0454677	0.0458204	0.00044747	0.000124672	0	0.000162987	0.0463925	98.7667	0.964531	0.268733	0	0.350091	0.964531	99.0355	0.268733	99.7313
EIO.MW15.F	10	A	0	0	0.000112669	0	8.76521e-05	0	0	0	0.000125714	0.000119449	0.000151435	0.0209962	0.0211247	0.000151435	8.76521e-05	0	0.000261773	0.0213638	98.8809	0.708839	0.410284	0	1.21048	0.708839	99.2912	0.410284	99.5897
EIO.MW15.F	10	B	0	0	0.000149862	0	7.93404e-05	0	0	0	0.000221239	0.000113809	0.00016218	0.0224901	0.022661	0.00016218	7.93404e-05	0	0.000350874	0.0229025	98.9454	0.708132	0.346427	0	1.50892	0.708132	99.2919	0.346427	99.6536
EIO.MW17.31	01	A	0	0	0	0	0.00466	0	0	0.00697737	2.6347e-05	0	0.00547273	0.00271269	0.00271269	0.00547273	0.00466	0.00697737	2.6347e-05	0.0198228	13.6847	27.6083	23.5083	35.1987	0.132736	62.807	37.193	58.707	41.293
EIO.MW17.31	01	B	0	0	0	0	0.0063584	0	0	0.00818658	1.31894e-05	0	0.00628947	0.00332994	0.00332994	0.00628947	0.0063584	0.00818658	1.31894e-05	0.0241644	13.7804	26.0279	26.3131	33.8787	0.0545522	59.9066	40.0934	60.1918	39.8082
EIO.MW17.31	02	A	0	9.80376e-05	0	0.000354518	0.00601675	0	0	0.00550853	0.000240763	0.000121856	0.000258486	0.000351152	0.000351152	0.000258486	0.0061285	0.00550853	0.000379565	0.0122467	2.86733	2.11066	50.0422	44.9798	3.00616	47.0905	52.9095	95.022	4.97799
EIO.MW17.31	02	B	0	0.000111838	0	0.000355833	0.0064892	0	0	0.00628186	0.000342935	0.000137227	0.000307671	0.000408309	0.000408309	0.000307671	0.00661669	0.00628186	0.000499245	0.0136145	2.99907	2.25987	48.6002	46.1409	3.53729	48.4007	51.5993	94.7411	5.25894
EIO.MW17.31	03	A	0	0	6.79048e-05	0	5.86873e-05	0	0	0.00013212	0	7.95061e-05	0.00592205	0.00775073	0.00782814	0.00592205	5.86873e-05	0.00013212	9.05623e-05	0.013941	56.1519	42.4794	0.420969	0.947706	0.645418	43.4271	56.5729	1.36868	98.6313
EIO.MW17.31	03	B	0	0	5.68191e-05	0	4.30312e-05	0	0	0.000137376	0	7.47537e-05	0.00462135	0.00578876	0.00585353	0.00462135	4.30312e-05	0.000137376	8.5149e-05	0.0106553	54.9354	43.3715	0.403849	1.28927	0.792789	44.6607	55.3393	1.69312	98.3069
EIO.MW17.31	04	A	0	8.7791e-05	0	0.000104989	0.00973672	0	0	0.00329523	3.60702e-05	0	0.00706961	0.0106646	0.0106646	0.00706961	0.0098368	0.00329523	3.60702e-05	0.0308662	34.5509	22.9041	31.8692	10.6758	0.116724	33.5799	66.4201	42.545	57.455
EIO.MW17.31	04	B	0	0.000109377	0	9.53865e-05	0.00939831	0	0	0.00325754	2.12296e-05	0	0.00684027	0.010573	0.010573	0.00684027	0.00952299	0.00325754	2.12296e-05	0.0301938	35.017	22.6546	31.5396	10.7888	0.0702619	33.4434	66.5566	42.3284	57.6716
EIO.MW17.31	05	A	0	0	7.18247e-05	0	6.31961e-05	0.000119983	0	0.000395126	0	0	0.0159717	0.00681684	0.00689872	0.0161101	6.31961e-05	0.000395126	0	0.0234671	29.3973	68.6496	0.269296	1.68374	0	70.3334	29.6666	1.95304	98.047
EIO.MW17.31	05	B	0	0	5.95642e-05	0	6.62905e-05	0.000111107	0	0.000363004	0	0	0.0173197	0.0067131	0.006781	0.0174479	6.62905e-05	0.000363004	0	0.0246582	27.5	70.759	0.268838	1.47215	0	72.2312	27.7688	1.74098	98.259
EIO.MW17.31	06	A	0	0	0	0	0.00618955	0	0	0.0078542	0.000132695	0	0.00611421	0.00251065	0.00251065	0.00611421	0.00618955	0.0078542	0.000132695	0.0226686	11.0754	26.9722	27.3045	34.6479	0.581961	61.6201	38.3799	61.9524	38.0476
EIO.MW17.31	06	B	0	0	0	0	0.00742979	0	0	0.0101036	0.00022545	0	0.00743134	0.00283502	0.00283502	0.00743134	0.00742979	0.0101036	0.00022545	0.0277998	10.198	26.7317	26.7261	36.3442	0.804456	63.0759	36.9241	63.0703	36.9297
EIO.MW17.31	07	A	0	0	0	0.000200595	0.00208824	0	0	0.00364561	3.0132e-05	7.82373e-05	0.000140196	0.000123559	0.000123559	0.000140196	0.00208824	0.00364561	0.000119249	0.0059976	2.06015	2.33753	34.8179	60.7845	1.94952	63.122	36.878	95.6023	4.39768
EIO.MW17.31	07	B	0	0	0	0.000248026	0.00171672	0	0	0.00298703	1.18567e-05	8.98612e-05	0.000128412	7.51651e-05	7.51651e-05	0.000128412	0.00171672	0.00298703	0.000114214	0.00490733	1.53169	2.61674	34.9829	60.8687	2.27448	63.4854	36.5146	95.8516	4.14843
EIO.MW17.31	08	A	8.03465e-05	9.75814e-05	0	6.34004e-05	0.014919	0	0	0.00821212	0.000106231	6.98331e-05	0.00680254	0.00718951	0.00718951	0.00680254	0.0150303	0.00830481	0.000185775	0.0373271	19.2608	18.2241	40.2663	22.2487	0.495231	40.4728	59.5272	62.5151	37.4849
EIO.MW17.31	08	B	8.29992e-05	0.000109511	0	6.47742e-05	0.0164056	0	0	0.00909552	0.000144323	6.82411e-05	0.00750585	0.00769058	0.00769058	0.00750585	0.0165304	0.00919127	0.000222054	0.0409181	18.795	18.3436	40.3988	22.4626	0.53975	40.8062	59.1938	62.8614	37.1386
EIO.MW17.31	09	A	0	0	0	0.000160539	3.73718e-05	0	0	0.000479331	0.000177647	0.000212224	0.00760524	0.00571609	0.00571609	0.00760524	3.73718e-05	0.000479331	0.000419384	0.013838	41.3071	54.959	0.270066	3.46387	2.94151	58.4228	41.5772	3.73393	96.2661
EIO.MW17.31	09	B	0	0	0	0.00018235	5.72054e-05	0	0	0.000662817	0.000525211	0.000220093	0.0110011	0.00862298	0.00862298	0.0110011	5.72054e-05	0.000662817	0.00077591	0.0203441	42.3856	54.0752	0.281188	3.25803	3.67381	57.3333	42.6667	3.53921	96.4608
EIO.MW17.31	10	A	0	0	0	0.000213043	0.00412001	0	0	0.00475386	0.000271387	0.000238527	0.000251313	0.000168745	0.000168745	0.000251313	0.00412001	0.00475386	0.000543085	0.00929392	1.81565	2.70406	44.3301	51.1502	5.52083	53.8542	46.1458	95.4803	4.5197
EIO.MW17.31	10	B	0	0	0	0.000264353	0.00332687	0	0	0.00384571	0.000233949	0.000212499	0.000192941	0.00024554	0.00024554	0.000192941	0.00332687	0.00384571	0.000475998	0.00761106	3.22609	2.535	43.7109	50.528	5.88593	53.063	46.937	94.2389	5.7611
EIO.MW17.04	01	A	0	0	0.000115838	0.00027456	0.00315522	0	0	6.87643e-05	0	0.000143608	0.000250014	0.00874267	0.00887471	0.000250014	0.00315522	6.87643e-05	0.000163578	0.0123487	71.8675	2.02462	25.551	0.556854	1.30734	2.58147	97.4185	26.1079	73.8921
EIO.MW17.04	01	B	0	0	0.000106127	0.00023426	0.00262555	0	0	6.13706e-05	0	0.000126764	0.000206	0.00776344	0.00788442	0.000206	0.00262555	6.13706e-05	0.000144392	0.0107773	73.1574	1.91142	24.3618	0.569441	1.32206	2.48086	97.5191	24.9312	75.0688
EIO.MW17.04	02	A	0	0.000209679	0	0	0.0413554	0	0	0.000606382	0	0.000177529	0	0.001992	0.001992	0	0.0415944	0.000606382	0.000202216	0.0441928	4.50753	0	94.1203	1.37213	0.455493	1.37213	98.6279	95.4925	4.50753
EIO.MW17.04	02	B	0	0.0002442	0	0	0.041879	0	0	0.000628448	0	0.000140065	0	0.00179094	0.00179094	0	0.0421574	0.000628448	0.000159543	0.0445768	4.01765	0	94.5725	1.40981	0.356629	1.40981	98.5902	95.9824	4.01765
EIO.MW17.04	03	A	0	0.000113358	0	9.88868e-05	0.0235806	0	0	0.000896149	0	8.57493e-05	0	0.00114624	0.00114624	0	0.0237098	0.000896149	9.76737e-05	0.0257522	4.45104	0	92.0691	3.47989	0.377849	3.47989	96.5201	95.549	4.45104
EIO.MW17.04	03	B	0	0.000181931	0	0.000112879	0.0291685	0	0	0.00107471	0	0.000116356	0	0.00141575	0.00141575	0	0.0293759	0.00107471	0.000132536	0.0318663	4.44279	0	92.1847	3.37255	0.41419	3.37255	96.6275	95.5572	4.44279
EIO.MW17.04	04	A	0	0.000180997	0	0	0.0285046	0	0	0.000789645	0	5.95613e-05	8.12898e-05	0.00129819	0.00129819	8.12898e-05	0.0287109	0.000789645	6.78439e-05	0.03088	4.20397	0.263244	92.9756	2.55714	0.21922	2.82038	97.1796	95.5328	4.46721
EIO.MW17.04	04	B	0	0.000178863	0	0	0.0277887	0	0	0.000786754	0	5.80931e-05	6.90279e-05	0.001315	0.001315	6.90279e-05	0.0279926	0.000786754	6.61715e-05	0.0301634	4.3596	0.228847	92.8032	2.60831	0.218897	2.83715	97.1628	95.4116	4.58844
EIO.MW17.04	05	A	0	0	0.000184773	9.63095e-05	0.000129255	0	0	4.70636e-05	0.000114499	0.000278726	0.00299595	0.0353654	0.0355761	0.00299595	0.000129255	4.70636e-05	0.000431985	0.0387483	91.8132	7.73181	0.333576	0.12146	1.10256	7.85327	92.1467	0.455036	99.545
EIO.MW17.04	05	B	0	0	0.000217598	0.00010445	0.000126081	0	0	4.74338e-05	0.000182593	0.000265376	0.00330865	0.0379804	0.0382284	0.00330865	0.000126081	4.74338e-05	0.000484872	0.0417106	91.6516	7.93239	0.302277	0.113721	1.14911	8.04611	91.9539	0.415998	99.584
EIO.MW17.04	06	A	0	0	7.26161e-05	0.000163536	0.0083628	0	0	0.000117196	2.60329e-05	0.000134218	0.000134371	0.00761182	0.0076946	0.000134371	0.0083628	0.000117196	0.000178916	0.016309	47.1802	0.823911	51.2773	0.718598	1.08514	1.54251	98.4575	51.9959	48.0041
EIO.MW17.04	06	B	0	0	7.56464e-05	0.000165998	0.00773431	0	0	0.000107056	6.0333e-05	0.000152075	0.000120094	0.00692584	0.00701207	0.000120094	0.00773431	0.000107056	0.000233556	0.0149735	46.8298	0.80204	51.6532	0.714966	1.53584	1.51701	98.483	52.3682	47.6318
EIO.MW17.04	07	A	0	0	0	0.000158397	0.00924959	0	0	0.000147615	0	0.000121467	0	0.000504385	0.000504385	0	0.00924959	0.000147615	0.000138358	0.00990159	5.09398	0	93.4152	1.49082	1.37807	1.49082	98.5092	94.906	5.09398
EIO.MW17.04	07	B	0	0	0	0.000170228	0.00795826	0	0	0.00011877	0	9.56297e-05	0	0.00047298	0.00047298	0	0.00795826	0.00011877	0.000108928	0.00855001	5.53192	0	93.079	1.38912	1.25798	1.38912	98.6109	94.4681	5.53192
EIO.MW17.04	08	A	0	0	0.000258276	0.000228131	0.00012533	0	0	5.66163e-05	2.98993e-05	0.000254214	0.00174192	0.0311296	0.031424	0.00174192	0.00012533	5.66163e-05	0.000319464	0.0333479	94.2309	5.22347	0.375826	0.169775	0.948885	5.39325	94.6068	0.5456	99.4544
EIO.MW17.04	08	B	0	0	0.00025357	0.000210428	0.000116272	0	0	5.33332e-05	1.42973e-05	0.000215455	0.00144526	0.0252888	0.0255779	0.00144526	0.000116272	5.33332e-05	0.000259714	0.0271928	94.0614	5.31488	0.427583	0.19613	0.946049	5.51101	94.489	0.623713	99.3763
EIO.MW17.04	09	A	0	8.82859e-05	0.000101142	0	0.0173709	0	0	0.00119611	7.60025e-05	0	0.00191457	0.015709	0.0158243	0.00191457	0.0174715	0.00119611	7.60025e-05	0.0364065	43.4656	5.25887	47.9901	3.28543	0.208326	8.5443	91.4557	51.2755	48.7245
EIO.MW17.04	09	B	0	9.86233e-05	9.53122e-05	0	0.0155038	0	0	0.00106642	5.64045e-05	0	0.00178136	0.0147542	0.0148629	0.00178136	0.0156163	0.00106642	5.64045e-05	0.0333269	44.5972	5.34511	46.8578	3.19986	0.16896	8.54497	91.455	50.0577	49.9423
EIO.MW17.04	10	A	0	0.000114411	0	0.000140835	0.0153032	0	0	0.000816772	5.02436e-05	0	9.41801e-05	0.000742716	0.000742716	9.41801e-05	0.0154336	0.000816772	5.02436e-05	0.0170872	4.34661	0.551172	90.3222	4.78001	0.29318	5.33118	94.6688	95.1022	4.89778
EIO.MW17.04	10	B	0	0.00010461	0	0.000155196	0.0110241	0	0	0.000578723	1.80812e-05	0	9.89208e-05	0.000531012	0.000531012	9.89208e-05	0.0111433	0.000578723	1.80812e-05	0.012352	4.29901	0.800851	90.2149	4.68527	0.146169	5.48612	94.5139	94.9001	5.09986
EIO.MW17.12	01	A	0	0	0	0	0.0174619	0	0	0.000115379	2.20553e-05	0.000105235	0	0.000760763	0.000760763	0	0.0174619	0.000115379	0.000141924	0.0183381	4.14854	0	95.2223	0.629177	0.767989	0.629177	99.3708	95.8515	4.14854
EIO.MW17.12	01	B	0	0	0	0	0.018417	0	0	9.33776e-05	3.59016e-05	0.000132034	0	0.000842724	0.000842724	0	0.018417	9.33776e-05	0.000186296	0.0193531	4.35447	0	95.163	0.482494	0.953437	0.482494	99.5175	95.6455	4.35447
EIO.MW17.12	02	A	0	0	0	0	0.0149616	0	0	0.000500466	2.11692e-05	0	0	0.000588923	0.000588923	0	0.0149616	0.000500466	2.11692e-05	0.016051	3.66907	0	93.213	3.11797	0.131713	3.11797	96.882	96.3309	3.66907
EIO.MW17.12	02	B	0	0	0	0	0.0164465	0	0	0.000561941	2.51341e-05	0	0	0.000672673	0.000672673	0	0.0164465	0.000561941	2.51341e-05	0.0176811	3.80447	0	93.0173	3.1782	0.141951	3.1782	96.8218	96.1955	3.80447
EIO.MW17.12	03	A	0	0	0	0	0.0236941	0	0	0.000579741	3.20486e-05	0	0	0.000923764	0.000923764	0	0.0236941	0.000579741	3.20486e-05	0.0251976	3.66608	0	94.0331	2.30078	0.127028	2.30078	97.6992	96.3339	3.66608
EIO.MW17.12	03	B	0	0	0	0	0.019413	0	0	0.000495751	3.85487e-05	0	0	0.000758483	0.000758483	0	0.019413	0.000495751	3.85487e-05	0.0206672	3.66998	0	93.9313	2.39873	0.186173	2.39873	97.6013	96.33	3.66998
EIO.MW17.12	04	A	0	0	0	0	0.0122504	0	0	0.00101829	0	0	0	0.000512976	0.000512976	0	0.0122504	0.00101829	0	0.0137817	3.72216	0	88.8891	7.3887	0	7.3887	92.6113	96.2778	3.72216
EIO.MW17.12	04	B	0	0	0	0	0.0119475	0	0	0.000983695	0	0	0	0.00053304	0.00053304	0	0.0119475	0.000983695	0	0.0134642	3.95895	0	88.735	7.306	0	7.306	92.694	96.0411	3.95895
EIO.MW17.12	05	A	0	0	0	0	0.0251327	0	0	0.000317075	3.49722e-05	9.47068e-05	0	0.000954367	0.000954367	0	0.0251327	0.000317075	0.000142849	0.0264041	3.61446	0	95.1847	1.20085	0.538099	1.20085	98.7991	96.3855	3.61446
EIO.MW17.12	05	B	0	0	0	0	0.0308537	0	0	0.000372391	5.65118e-05	0.000106792	0	0.00126355	0.00126355	0	0.0308537	0.000372391	0.000178155	0.0324896	3.88908	0	94.9647	1.14618	0.545354	1.14618	98.8538	96.1109	3.88908
EIO.MW17.12	06	A	0	0	0	0	0.0108505	0	0	7.61553e-05	0	0	0	0.000418414	0.000418414	0	0.0108505	7.61553e-05	0	0.0113451	3.68807	0	95.6407	0.671263	0	0.671263	99.3287	96.3119	3.68807
EIO.MW17.12	06	B	0	0	0	0	0.0122934	0	0	7.66095e-05	0	0	0	0.000539788	0.000539788	0	0.0122934	7.66095e-05	0	0.0129098	4.18121	0	95.2254	0.593419	0	0.593419	99.4066	95.8188	4.18121
EIO.MW17.12	07	A	0	0	0	0	0.0170864	0	0	0.00023881	0	6.10861e-05	0	0.000686237	0.000686237	0	0.0170864	0.00023881	6.95807e-05	0.0180114	3.81001	0	94.8641	1.32588	0.384828	1.32588	98.6741	96.19	3.81001
EIO.MW17.12	07	B	0	0	0	0	0.0176063	0	0	0.000243632	0	7.38652e-05	0	0.000701308	0.000701308	0	0.0176063	0.000243632	8.4137e-05	0.0185513	3.78038	0	94.9063	1.31329	0.45149	1.31329	98.6867	96.2196	3.78038
EIO.MW17.12	08	A	0	0.000131968	0	0	0.029	0	0	0.000326287	5.29539e-05	0.000133798	0	0.00121505	0.00121505	0	0.0291504	0.000326287	0.000205358	0.0306917	3.95887	0	94.978	1.06311	0.664652	1.06311	98.9369	96.0411	3.95887
EIO.MW17.12	08	B	0	0.00014975	0	0	0.031494	0	0	0.000339838	7.38127e-05	0.000159148	0	0.00129373	0.00129373	0	0.0316648	0.000339838	0.000255092	0.0332983	3.88526	0	95.0942	1.02059	0.760258	1.02059	98.9794	96.1147	3.88526
EIO.MW17.12	09	A	0	7.70941e-05	0	0	0.0170771	0	0	0.000158987	2.74982e-05	0	0	0.000778005	0.000778005	0	0.017165	0.000158987	2.74982e-05	0.018102	4.2979	0	94.8238	0.878286	0.151677	0.878286	99.1217	95.7021	4.2979
EIO.MW17.12	09	B	0	7.57201e-05	0	0	0.0180267	0	0	0.000192619	3.21443e-05	0	0	0.000762754	0.000762754	0	0.018113	0.000192619	3.21443e-05	0.0190684	4.0001	0	94.9897	1.01015	0.16829	1.01015	98.9899	95.9999	4.0001
EIO.MW17.12	10	A	0	9.67152e-05	0	0	0.0117605	0	0	0.000612088	0	9.35718e-05	0	0.000523555	0.000523555	0	0.0118707	0.000612088	0.000106584	0.0130063	4.02538	0	91.2685	4.70607	0.812815	4.70607	95.2939	95.9746	4.02538
EIO.MW17.12	10	B	0	7.04771e-05	0	0	0.00995022	0	0	0.00047542	0	8.26189e-05	0	0.000436426	0.000436426	0	0.0100306	0.00047542	9.4108e-05	0.0109424	3.98839	0	91.6669	4.34475	0.852697	4.34475	95.6553	96.0116	3.98839
EIO.MW17.20	01	A	0	0.000171412	0	0	0.0525788	0	0	0.0003569	0.00023738	0.000823681	0	0.00213571	0.00213571	0	0.0527742	0.0003569	0.0011756	0.0552668	3.86437	0	95.4899	0.645776	2.08284	0.645776	99.3542	96.1356	3.86437
EIO.MW17.20	01	B	0	0.000173723	0	0	0.0562574	0	0	0.000402957	0.00017855	0.000823514	0	0.00183604	0.00183604	0	0.0564554	0.000402957	0.00111658	0.0586944	3.12814	0	96.1853	0.686534	1.86685	0.686534	99.3135	96.8719	3.12814
EIO.MW17.20	02	A	0	0.000103883	0	0	0.0242243	0	0	0.0001665	6.46335e-05	8.87407e-05	0	0.000979553	0.000979553	0	0.0243428	0.0001665	0.000165715	0.0254888	3.84307	0	95.5037	0.653228	0.645947	0.653228	99.3468	96.1569	3.84307
EIO.MW17.20	02	B	0	0.000122251	0	0	0.026595	0	0	0.000205664	5.95987e-05	0.000124353	0	0.000763957	0.000763957	0	0.0267343	0.000205664	0.000201244	0.0277039	2.75757	0	96.5001	0.742364	0.72117	0.742364	99.2576	97.2424	2.75757
EIO.MW17.20	03	A	0	0.000104773	0	0	0.0287992	0	0	0.000222241	8.95627e-05	0.000154328	0	0.00114004	0.00114004	0	0.0289186	0.000222241	0.000265351	0.0302809	3.76487	0	95.5012	0.733932	0.868686	0.733932	99.2661	96.2351	3.76487
EIO.MW17.20	03	B	0	0.000148586	0	0	0.028312	0	0	0.000216951	9.99985e-05	0.000176664	0	0.000965408	0.000965408	0	0.0284813	0.000216951	0.00030123	0.0296637	3.25451	0	96.0141	0.731367	1.00527	0.731367	99.2686	96.7455	3.25451
EIO.MW17.20	04	A	0	0.000146729	0	0	0.0451306	0	0	0.000302145	8.54677e-05	9.65399e-05	0	0.00118159	0.00118159	0	0.0452979	0.000302145	0.000195433	0.0467816	2.52576	0	96.8284	0.645862	0.416017	0.645862	99.3541	97.4742	2.52576
EIO.MW17.20	04	B	0	0.000109382	0	0	0.0345829	0	0	0.000243717	7.05808e-05	0.000109354	0	0.00135136	0.00135136	0	0.0347076	0.000243717	0.000195142	0.0363026	3.7225	0	95.6062	0.671348	0.534668	0.671348	99.3287	96.2775	3.7225
EIO.MW17.20	05	A	0	0.000147294	0	0	0.0280526	0	0	0.000285547	0.00025321	0.000125154	0	0.00114272	0.00114272	0	0.0282206	0.000285547	0.000395768	0.0296488	3.85418	0	95.1827	0.963098	1.31727	0.963098	99.0369	96.1458	3.85418
EIO.MW17.20	05	B	0	0.000160473	0	0	0.0356856	0	0	0.000342776	0.000374502	0.000148159	0	0.0012376	0.0012376	0	0.0358686	0.000342776	0.000543264	0.037449	3.30477	0	95.7799	0.915316	1.42993	0.915316	99.0847	96.6952	3.30477
EIO.MW17.20	06	A	0	0.000107049	0	0	0.0353102	0	0	0.000297291	0.00010895	0	0	0.00143988	0.00143988	0	0.0354322	0.000297291	0.00010895	0.0371694	3.87383	0	95.3263	0.799827	0.292261	0.799827	99.2002	96.1262	3.87383
EIO.MW17.20	06	B	0	0.000102301	0	0	0.036971	0	0	0.000334628	0.000101828	0	0	0.00131532	0.00131532	0	0.0370876	0.000334628	0.000101828	0.0387376	3.39546	0	95.7407	0.863834	0.262176	0.863834	99.1362	96.6045	3.39546
EIO.MW17.20	07	A	0	0.000163249	0	0	0.0435095	0	0	0.000286335	0.000100246	0.000147248	0	0.00144482	0.00144482	0	0.0436956	0.000286335	0.000267971	0.0454268	3.18055	0	96.1891	0.630322	0.586437	0.630322	99.3697	96.8195	3.18055
EIO.MW17.20	07	B	0	0.000162007	0	0	0.0481169	0	0	0.000299577	0.000170818	9.33947e-05	0	0.00150728	0.00150728	0	0.0483016	0.000299577	0.0002772	0.0501084	3.00804	0	96.3941	0.597857	0.550158	0.597857	99.4021	96.992	3.00804
EIO.MW17.20	08	A	0	0.000145262	0	0	0.034403	0	0	0.000264162	0.000116964	0.000146775	0	0.000924112	0.000924112	0	0.0345686	0.000264162	0.00028415	0.0357569	2.58443	0	96.6768	0.738772	0.788408	0.738772	99.2612	97.4156	2.58443
EIO.MW17.20	08	B	0	0.000118682	0	0	0.0288996	0	0	0.000221796	4.62023e-05	0.000144385	0	0.000996878	0.000996878	0	0.0290348	0.000221796	0.000210665	0.0302535	3.29508	0	95.9718	0.733126	0.691518	0.733126	99.2669	96.7049	3.29508
EIO.MW17.20	09	A	0	0.000219669	0	0	0.0474989	0	0	0.000334863	0.000116662	0.000309641	0	0.00136458	0.00136458	0	0.0477493	0.000334863	0.000469362	0.0494487	2.75958	0	96.5632	0.677193	0.940264	0.677193	99.3228	97.2404	2.75958
EIO.MW17.20	09	B	0	0.000268105	0	0	0.0427189	0	0	0.000295483	7.45179e-05	0.000257029	0	0.00158269	0.00158269	0	0.0430245	0.000295483	0.00036729	0.0449027	3.52471	0	95.8172	0.658053	0.811331	0.658053	99.3419	96.4753	3.52471
EIO.MW17.20	10	A	0	0.000136129	0	0	0.0382179	0	0	0.000256224	0.000139224	0.000119717	0	0.0017176	0.0017176	0	0.0383731	0.000256224	0.000275589	0.0403469	4.25709	0	95.1079	0.635052	0.678416	0.635052	99.3649	95.7429	4.25709
EIO.MW17.20	10	B	0	0.000109134	0	0	0.0385674	0	0	0.000280632	0.0001018	0.00011855	0	0.00171847	0.00171847	0	0.0386918	0.000280632	0.000236836	0.0406909	4.22324	0	95.0871	0.689668	0.578669	0.689668	99.3103	95.7768	4.22324
EIO.MW17.26	01	A	0	0.000140331	0	0	0.0532278	0	0	0.00362334	0.00191781	0	0.000234498	0.00247651	0.00247651	0.000234498	0.0533877	0.00362334	0.00191781	0.0597221	4.14673	0.392649	89.3936	6.067	3.11132	6.45965	93.5404	95.4606	4.53938
EIO.MW17.26	01	B	0	0.000158322	0	0	0.047883	0	0	0.00314616	0.00139997	0	0.000204194	0.00231101	0.00231101	0.000204194	0.0480635	0.00314616	0.00139997	0.0537249	4.30157	0.380074	89.4623	5.85606	2.53963	6.23614	93.7639	95.3184	4.68164
EIO.MW17.26	02	A	0	0.000134519	0	0	0.0424257	0	0	0.00452986	0.000749112	0	0.000270282	0.00195525	0.00195525	0.000270282	0.0425791	0.00452986	0.000749112	0.0493345	3.96326	0.547856	86.3069	9.18194	1.49572	9.7298	90.2702	95.4889	4.51112
EIO.MW17.26	02	B	0	0.000174508	0	0	0.0486733	0	0	0.00491212	0.000643545	0	0.000303264	0.00221297	0.00221297	0.000303264	0.0488723	0.00491212	0.000643545	0.0563006	3.93063	0.538652	86.8059	8.72481	1.13013	9.26346	90.7365	95.5307	4.46928
EIO.MW17.26	03	A	0	0.000134617	0	0	0.0436731	0	0	0.00561889	0.00169827	0.000104638	0.000310973	0.00204348	0.00204348	0.000310973	0.0438265	0.00561889	0.00181746	0.0517999	3.94495	0.600337	84.6074	10.8473	3.38969	11.4476	88.5524	95.4547	4.54528
EIO.MW17.26	03	B	0	0.00016951	0	0	0.0396858	0	0	0.00506943	0.00150494	6.52133e-05	0.000306754	0.00182269	0.00182269	0.000306754	0.039879	0.00506943	0.00157922	0.0470779	3.87164	0.651587	84.7086	10.7682	3.24562	11.4198	88.5802	95.4768	4.52323
EIO.MW17.26	04	A	0	9.7266e-05	0	0	0.0186424	0	0	0.00245752	0.000389337	0	0.000145095	0.000817115	0.000817115	0.000145095	0.0187532	0.00245752	0.000389337	0.022173	3.68519	0.65438	84.577	11.0834	1.72561	11.7378	88.2622	95.6604	4.33957
EIO.MW17.26	04	B	0	9.83673e-05	0	0	0.0173467	0	0	0.00214467	0.000402888	0	0.000129632	0.000735416	0.000735416	0.000129632	0.0174589	0.00214467	0.000402888	0.0204686	3.5929	0.633324	85.2959	10.4779	1.93033	11.1112	88.8888	95.7738	4.22623
EIO.MW17.26	05	A	0	0.000143497	0	0	0.03403	0	0	0.00266783	0.000490734	0	0.00015744	0.00143626	0.00143626	0.00015744	0.0341936	0.00266783	0.000490734	0.0384551	3.73489	0.409411	88.9182	6.9375	1.26004	7.34691	92.6531	95.8557	4.1443
EIO.MW17.26	05	B	0	0.000163002	0	0	0.0501596	0	0	0.00376248	0.000916253	0	0.000242413	0.0022733	0.0022733	0.000242413	0.0503454	0.00376248	0.000916253	0.0566236	4.01476	0.428113	88.9124	6.64473	1.59238	7.07284	92.9272	95.5571	4.44287
EIO.MW17.26	06	A	0	0.00015914	0	0	0.0333264	0	0	0.00345398	0.00506408	7.08383e-05	0.00023005	0.00137137	0.00137137	0.00023005	0.0335078	0.00345398	0.00514477	0.0385632	3.55616	0.596552	86.8906	8.95668	11.7708	9.55323	90.4468	95.8473	4.15271
EIO.MW17.26	06	B	0	0.000141365	0	0	0.0326567	0	0	0.00364801	0.00594104	0.000100611	0.000245917	0.00128261	0.00128261	0.000245917	0.0328179	0.00364801	0.00605564	0.0379944	3.37578	0.647246	86.3755	9.60144	13.7472	10.2487	89.7513	95.977	4.02302
EIO.MW17.26	07	A	0	0.000151275	0	0	0.0491895	0	0	0.00071525	0.000515439	0.000182221	0	0.00171572	0.00171572	0	0.0493619	0.00071525	0.000722999	0.0517929	3.31266	0	95.3064	1.38098	1.37673	1.38098	98.619	96.6873	3.31266
EIO.MW17.26	07	B	0	0.000135982	0	0	0.0414697	0	0	0.00057596	0.000441114	0.000158502	0	0.00148211	0.00148211	0	0.0416247	0.00057596	0.000621657	0.0436828	3.39288	0	95.2886	1.3185	1.40315	1.3185	98.6815	96.6071	3.39288
EIO.MW17.26	08	A	0	9.95722e-05	0	0	0.0311316	0	0	0.000340391	0.000202962	0.000161326	0	0.000980915	0.000980915	0	0.0312451	0.000340391	0.000386722	0.0325664	3.01205	0	95.9427	1.04522	1.17355	1.04522	98.9548	96.988	3.01205
EIO.MW17.26	08	B	0	9.20813e-05	0	0	0.0274296	0	0	0.000359014	0.000222383	0.000132248	0	0.000868394	0.000868394	0	0.0275346	0.000359014	0.000373022	0.028762	3.01924	0	95.7325	1.24822	1.28032	1.24822	98.7518	96.9808	3.01924
EIO.MW17.26	09	A	0	0.00011418	0	0	0.0522556	0	0	0.0054977	0.00198871	0.000103631	0.000359124	0.00170086	0.00170086	0.000359124	0.0523857	0.0054977	0.00210675	0.0599434	2.83744	0.599105	87.392	9.17148	3.39524	9.77059	90.2294	96.5635	3.43655
EIO.MW17.26	09	B	0	9.47616e-05	0	0	0.0428562	0	0	0.00414654	0.00137221	0.00010845	0.000304622	0.0014034	0.0014034	0.000304622	0.0429642	0.00414654	0.00149574	0.0488188	2.87471	0.623986	88.0076	8.49373	2.97278	9.11772	90.8823	96.5013	3.49869
EIO.MW17.26	10	A	0	0.000133531	0	0	0.0358966	0	0	0.00166874	0.00425783	8.43402e-05	0.000245042	0.00112829	0.00112829	0.000245042	0.0360489	0.00166874	0.0043539	0.0390909	2.88633	0.626851	92.2179	4.26887	10.0217	4.89572	95.1043	96.4868	3.51318
EIO.MW17.26	10	B	0	0.000145043	0	0	0.0378481	0	0	0.00170821	0.00546598	6.41128e-05	0.000131799	0.0017813	0.0017813	0.000131799	0.0380134	0.00170821	0.00553901	0.0416347	4.2784	0.316559	91.3022	4.10285	11.7417	4.41941	95.5806	95.405	4.59496
EIO.MW17.28	01	A	0	0	0.000176151	0	0.00012849	0	0	3.22076e-05	2.13583e-05	0.000194021	0.00173287	0.0300523	0.0302531	0.00173287	0.00012849	3.22076e-05	0.00024236	0.0321467	94.1096	5.39053	0.3997	0.100189	0.748279	5.49072	94.5093	0.499889	99.5001
EIO.MW17.28	01	B	0	0	0.000167038	0	0.000112613	0	0	2.35429e-05	1.68867e-05	0.000151824	0.00157095	0.0282727	0.0284631	0.00157095	0.000112613	2.35429e-05	0.000189823	0.0301702	94.3418	5.20695	0.373261	0.0780335	0.625241	5.28498	94.715	0.451294	99.5487
EIO.MW17.28	02	A	0	0	8.04765e-05	0	8.13969e-05	0	0	2.53725e-05	2.27093e-05	0.000133539	0.00118185	0.0204822	0.0205739	0.00118185	8.13969e-05	2.53725e-05	0.000174818	0.0218625	94.1058	5.40582	0.372312	0.116055	0.793282	5.52188	94.4781	0.488367	99.5116
EIO.MW17.28	02	B	0	0	7.27377e-05	0	7.36801e-05	0	0	2.29659e-05	1.97821e-05	0.00011388	0.00107495	0.0176712	0.0177541	0.00107495	7.36801e-05	2.29659e-05	0.000149498	0.0189257	93.8095	5.67984	0.389311	0.121347	0.78373	5.80119	94.1988	0.510659	99.4893
EIO.MW17.28	03	A	0	0	0.000182201	0	0.000108595	0	0	0	0.000125396	0	0.00174317	0.0323667	0.0325744	0.00174317	0.000108595	0	0.000125396	0.0344262	94.6211	5.06349	0.315443	0	0.362925	5.06349	94.9365	0.315443	99.6846
EIO.MW17.28	03	B	0	0	0.000147513	0	9.6928e-05	0	0	0	0.000174027	0	0.00156627	0.0285454	0.0287136	0.00156627	9.6928e-05	0	0.000174027	0.0303768	94.5248	5.15614	0.319086	0	0.56963	5.15614	94.8439	0.319086	99.6809
EIO.MW17.28	04	A	0	0	0.000177774	0	8.47891e-05	0	0	3.24801e-05	0.000201673	0.000108063	0.00169939	0.026889	0.0270917	0.00169939	8.47891e-05	3.24801e-05	0.000324763	0.0289083	93.7158	5.87855	0.293303	0.112355	1.11094	5.99091	94.0091	0.405659	99.5943
EIO.MW17.28	04	B	0	0	0.000226797	0	0.000107262	0	0	2.82798e-05	0.000272397	0.0001239	0.00201785	0.0347547	0.0350132	0.00201785	0.000107262	2.82798e-05	0.000413526	0.0371666	94.2061	5.42921	0.288599	0.0760892	1.10038	5.5053	94.4947	0.364688	99.6353
EIO.MW17.28	05	A	0	0	0.000155779	0	0.00012301	0	0	0	0.000317366	0.000122985	0.000852297	0.0438359	0.0440135	0.000852297	0.00012301	0	0.000457453	0.0449888	97.8321	1.89446	0.273423	0	1.00658	1.89446	98.1055	0.273423	99.7266
EIO.MW17.28	05	B	0	0	0.000156651	0	0.000118169	0	0	0	0.000258749	0.000103171	0.000680141	0.0381205	0.038299	0.000680141	0.000118169	0	0.000376268	0.0390973	97.9581	1.73961	0.302244	0	0.953213	1.73961	98.2604	0.302244	99.6978
EIO.MW17.28	06	A	0	0	0.000130408	0	0.000126959	0	0	4.06074e-05	5.967e-05	0.000139083	0.00336469	0.0326868	0.0328355	0.00336469	0.000126959	4.06074e-05	0.000218094	0.0363677	90.2874	9.25186	0.349098	0.111658	0.596116	9.36352	90.6365	0.460756	99.5392
EIO.MW17.28	06	B	0	0	9.0763e-05	0	7.28438e-05	0	0	3.51478e-05	5.81215e-05	0.000121881	0.00241708	0.02266	0.0227635	0.00241708	7.28438e-05	3.51478e-05	0.000196952	0.0252885	90.015	9.55801	0.28805	0.138987	0.772798	9.697	90.303	0.427038	99.573
EIO.MW17.28	07	A	0	0	0.00012005	0	0.000116981	0	0	0	7.43472e-05	0.000107366	0.000736874	0.0353249	0.0354617	0.000736874	0.000116981	0	0.000196644	0.0363156	97.6488	2.02908	0.322122	0	0.53857	2.02908	97.9709	0.322122	99.6779
EIO.MW17.28	07	B	0	0	0.000119638	0	0.000103961	0	0	0	4.64171e-05	9.00343e-05	0.000693074	0.0318887	0.0320251	0.000693074	0.000103961	0	0.000148972	0.0328221	97.5717	2.1116	0.316739	0	0.451825	2.1116	97.8884	0.316739	99.6833
EIO.MW17.28	08	A	0	0	0.000250736	0	0.000116477	0	0	0	2.74709e-05	9.64807e-05	0.00139658	0.0369003	0.0371861	0.00139658	0.000116477	0	0.000137368	0.0386991	96.0902	3.60881	0.300982	0	0.353709	3.60881	96.3912	0.300982	99.699
EIO.MW17.28	08	B	0	0	0.000319933	0	0.000153841	0	0	0	4.76597e-05	0.000101855	0.00174958	0.046238	0.0466027	0.00174958	0.000153841	0	0.000163679	0.0485061	96.0759	3.60693	0.317159	0	0.336305	3.60693	96.3931	0.317159	99.6828
EIO.MW17.28	09	A	0	0	0.000201835	0	9.81075e-05	0	0	0	0.000152394	0.000135655	0.00159327	0.0277529	0.027983	0.00159327	9.81075e-05	0	0.000306913	0.0296744	94.3002	5.3692	0.330614	0	1.02368	5.3692	94.6308	0.330614	99.6694
EIO.MW17.28	09	B	0	0	0.000222915	0	0.000110662	0	0	0	0.000145691	0.000137254	0.00163021	0.0277369	0.027991	0.00163021	0.000110662	0	0.000302031	0.0297319	94.1448	5.48304	0.372201	0	1.00563	5.48304	94.517	0.372201	99.6278
EIO.MW17.28	10	A	0	0	0.000108734	0	0.000128039	0	0	0	6.41404e-05	7.61583e-05	0.00109828	0.0418435	0.0419674	0.00109828	0.000128039	0	0.000150889	0.0431937	97.1609	2.54267	0.296429	0	0.348115	2.54267	97.4573	0.296429	99.7036
EIO.MW17.28	10	B	0	0	0.000145813	0	0.000116285	0	0	0	4.52688e-05	8.90138e-05	0.00107322	0.0394771	0.0396433	0.00107322	0.000116285	0	0.000146661	0.0408328	97.0869	2.62834	0.284784	0	0.357889	2.62834	97.3717	0.284784	99.7152
EIO.MW17.34	01	A	0	0	9.4768e-05	0.000470206	0.000262825	0.000251246	0	0.00031948	2.16031e-05	0.00110748	0.0401185	0.0212616	0.0213696	0.0404083	0.000262825	0.00031948	0.00128309	0.0623603	34.268	64.7982	0.421463	0.512314	2.01607	65.3105	34.6895	0.933776	99.0662
EIO.MW17.34	01	B	0	0	9.11985e-05	0.000422516	0.000249143	0.000240545	0	0.000300319	2.00569e-05	0.00109029	0.0400101	0.0219201	0.0220241	0.0402876	0.000249143	0.000300319	0.00126196	0.0628611	35.0361	64.0898	0.396339	0.477751	1.96803	64.5676	35.4324	0.874089	99.1259
EIO.MW17.34	02	A	0	0	0	0.00013299	4.76815e-05	0.000110746	0	0.000162428	1.60972e-05	0	0.0168056	0.00384852	0.00384852	0.0169334	4.76815e-05	0.000162428	1.60972e-05	0.020992	18.3333	80.6658	0.227142	0.773764	0.0766239	81.4396	18.5604	1.00091	98.9991
EIO.MW17.34	02	B	0	0	0	0.000149996	0.000113789	0.000157315	0	0.000191591	3.75287e-05	0	0.0211106	0.00532092	0.00532092	0.0212921	0.000113789	0.000191591	3.75287e-05	0.0269184	19.7668	79.0987	0.422717	0.711747	0.139222	79.8104	20.1896	1.13446	98.8655
EIO.MW17.34	03	A	0	0	0	0	4.88482e-05	0.000147397	0	0.000192934	0	0.000192061	0.0154922	0.00455358	0.00455358	0.0156623	4.88482e-05	0.000192934	0.00021877	0.0204576	22.2586	76.5595	0.238778	0.943092	1.05807	77.5026	22.4974	1.18187	98.8181
EIO.MW17.34	03	B	0	0	0	0	6.31165e-05	0.000152667	0	0.000203501	0	0.000209666	0.0164239	0.00522231	0.00522231	0.0166	6.31165e-05	0.000203501	0.000238822	0.0220889	23.6422	75.1508	0.285738	0.92128	1.06962	76.0721	23.9279	1.20702	98.793
EIO.MW17.34	04	A	0	0	0	0.000357066	0.000146021	0.000134806	0	0.000195792	5.84013e-05	8.11602e-05	0.0228953	0.0091501	0.0091501	0.0230508	0.000146021	0.000195792	0.000150848	0.0325427	28.1172	70.8324	0.448705	0.601646	0.461399	71.4341	28.5659	1.05035	98.9496
EIO.MW17.34	04	B	0	0	0	0.000386176	0.000186842	0.000141934	0	0.000177957	2.33947e-05	8.71052e-05	0.0201127	0.00740872	0.00740872	0.0202764	0.000186842	0.000177957	0.000122613	0.02805	26.4126	72.2869	0.666106	0.634429	0.435221	72.9213	27.0787	1.30053	98.6995
EIO.MW17.34	05	A	0	0	0	0.000408938	0.000216017	0.000141023	0	0.000165317	0	0.000222683	0.0162556	0.00480348	0.00480348	0.0164182	0.000216017	0.000165317	0.00025365	0.0216031	22.2352	75.9996	0.999939	0.765248	1.16051	76.7649	23.2351	1.76519	98.2348
EIO.MW17.34	05	B	0	0	0	0.000398108	0.000206067	0.000165806	0	0.000166397	0	0.00017255	0.0168796	0.00477732	0.00477732	0.0170709	0.000206067	0.000166397	0.000196545	0.0222207	21.4994	76.8243	0.927368	0.748839	0.876758	77.5732	22.4268	1.67621	98.3238
EIO.MW17.34	06	A	0	0	8.59637e-05	0.000638435	0.000135431	0	0	6.99094e-05	6.95975e-05	8.55692e-05	0.0044113	0.00426772	0.00436571	0.0044113	0.000135431	6.99094e-05	0.000167066	0.00898235	48.6032	49.1107	1.50774	0.778298	1.82597	49.889	50.111	2.28604	97.714
EIO.MW17.34	06	B	0	0	7.35514e-05	0.000531613	0.00012147	0	0	8.70519e-05	5.73312e-05	8.28225e-05	0.00440033	0.00367641	0.00376026	0.00440033	0.00012147	8.70519e-05	0.000151671	0.00836911	44.9302	52.5783	1.4514	1.04016	1.78001	53.6184	46.3816	2.49156	97.5084
EIO.MW17.34	07	A	0	0	0	0.000170362	9.91124e-05	0.000146269	0	0.000285615	0	0	0.0241792	0.00445483	0.00445483	0.0243479	9.91124e-05	0.000285615	0	0.0291875	15.2628	83.419	0.339572	0.978553	0	84.3976	15.6024	1.31813	98.6819
EIO.MW17.34	07	B	0	0	0	0.000173364	0.000110413	0.000161894	0	0.000272835	0	0	0.0195257	0.00368976	0.00368976	0.0197125	0.000110413	0.000272835	0	0.0237855	15.5127	82.8761	0.464202	1.14706	0	84.0231	15.9769	1.61127	98.3887
EIO.MW17.34	08	A	0	0	0.00022971	0.00170666	0.000345996	0.000116393	0	0.000159725	0	0.000285266	0.0112375	0.0213528	0.0216146	0.0113718	0.000345996	0.000159725	0.000324935	0.0334921	64.5364	33.9536	1.03307	0.476902	0.960862	34.4305	65.5695	1.50997	98.49
EIO.MW17.34	08	B	0	0	0.000221641	0.00125449	0.000273059	0.000102497	0	0.000144801	0	0.000265623	0.00971706	0.0154096	0.0156623	0.0098353	0.000273059	0.000144801	0.000302561	0.0259154	60.4361	37.9515	1.05366	0.558744	1.15402	38.5103	61.4897	1.6124	98.3876
EIO.MW17.34	09	A	0	0	0	0.000134845	7.55292e-05	0	0	9.41499e-05	0	0	0.00818429	0.0041912	0.0041912	0.00818429	7.55292e-05	9.41499e-05	0	0.0125452	33.4089	65.2386	0.602058	0.750487	0	65.989	34.011	1.35254	98.6475
EIO.MW17.34	09	B	0	0	0	0.000184754	8.06869e-05	0	0	0.000103726	0	0	0.00762746	0.00442266	0.00442266	0.00762746	8.06869e-05	0.000103726	0	0.0122345	36.149	62.3437	0.659501	0.847811	0	63.1915	36.8085	1.50731	98.4927
EIO.MW17.34	10	A	0	0	0	0	4.875e-05	0	0	0.000105259	0	0	0.0047259	0.00318908	0.00318908	0.0047259	4.875e-05	0.000105259	0	0.00806899	39.5227	58.5687	0.604165	1.30448	0	59.8732	40.1268	1.90865	98.0914
EIO.MW17.34	10	B	0	0	0	0	5.27427e-05	0	0	9.73359e-05	0	0	0.00458822	0.00294807	0.00294807	0.00458822	5.27427e-05	9.73359e-05	0	0.00768637	38.3546	59.6929	0.686185	1.26634	0	60.9593	39.0407	1.95253	98.0475
EIO.MW17.36	01	A	0	0	0.000120507	0.00115122	0.000328858	0.000117512	0	0.000114224	0.000236409	9.18818e-05	0.00720918	0.00536111	0.00549848	0.00734474	0.000328858	0.000114224	0.000341068	0.0132863	41.3846	55.2806	2.47517	0.859713	2.50282	56.1403	43.8597	3.33488	96.6651
EIO.MW17.36	01	B	0	0	8.79477e-05	0.000983088	0.000271733	8.54794e-05	0	0.000110811	0.000127334	9.69687e-05	0.00530311	0.00460416	0.00470441	0.00540172	0.000271733	0.000110811	0.000237788	0.0104887	44.8523	51.5005	2.59073	1.05649	2.21683	52.557	47.443	3.64721	96.3528
EIO.MW17.36	02	A	0	0	0	0.000106071	4.84265e-05	0	0	0.000210367	0.00227044	8.32388e-05	0.0076979	0.00886503	0.00886503	0.0076979	4.84265e-05	0.000210367	0.00236525	0.0168217	52.6999	45.7617	0.287881	1.25057	12.3274	47.0122	52.9878	1.53845	98.4616
EIO.MW17.36	02	B	0	0	0	0.000107093	5.29942e-05	0	0	0.000235581	0.00185192	7.77686e-05	0.00591221	0.00674504	0.00674504	0.00591221	5.29942e-05	0.000235581	0.0019405	0.0129458	52.102	45.6689	0.409354	1.81975	13.0355	47.4886	52.5114	2.2291	97.7709
EIO.MW17.36	03	A	9.89839e-05	9.58349e-05	0	0.000167872	0.0182988	0	0	0.0123248	0.00629568	0.000352421	0.00466233	0.00547316	0.00547316	0.00466233	0.018408	0.012439	0.00669711	0.0409825	13.3549	11.3764	44.9168	30.3519	14.0461	41.7283	58.2717	75.2687	24.7313
EIO.MW17.36	03	B	0.000111567	0.00011892	0	0.000165401	0.0181352	0	0	0.0125537	0.00778879	0.000377948	0.00470901	0.00473497	0.00473497	0.00470901	0.0182708	0.0126824	0.0082193	0.0403971	11.721	11.6568	45.2279	31.3943	16.9064	43.0511	56.9489	76.6222	23.3778
EIO.MW17.36	04	A	0	0	0	0.000183993	0	0	0	5.69298e-05	0.00187725	0.00013596	0.00024668	0.00177092	0.00177092	0.00024668	0	5.69298e-05	0.00203212	0.00207453	85.3649	11.8909	0	2.74422	49.4836	14.6351	85.3649	2.74422	97.2558
EIO.MW17.36	04	B	0	0	0	0.000119368	0	0	0	4.09969e-05	0.00113092	0.000111977	0.000179328	0.0014269	0.0014269	0.000179328	0	4.09969e-05	0.00125847	0.00164722	86.6245	10.8867	0	2.48885	43.3105	13.3755	86.6245	2.48885	97.5111
EIO.MW17.36	05	A	0	0	6.8335e-05	0.000299759	0.000241486	0.00015697	0	0.000166684	0.00166378	0.000113464	0.0170985	0.0119663	0.0120442	0.0172796	0.000241486	0.000166684	0.00179303	0.029732	40.5094	58.1178	0.812208	0.56062	5.68762	58.6784	41.3216	1.37283	98.6272
EIO.MW17.36	05	B	0	0	9.42617e-05	0.000490367	0.000328678	0.000199105	0	0.000201724	0.00165039	0.000142212	0.0226672	0.0129929	0.0131003	0.0228969	0.000328678	0.000201724	0.00181238	0.0365276	35.8642	62.6837	0.899809	0.552251	4.72714	63.236	36.764	1.45206	98.5479
EIO.MW17.36	06	A	0	0	9.1064e-05	0.000105225	8.73262e-05	0	0	0.000121305	0.00676135	0.000277075	0.00511799	0.0222124	0.0223162	0.00511799	8.73262e-05	0.000121305	0.00707695	0.0276429	80.7306	18.5147	0.315909	0.438829	20.383	18.9535	81.0465	0.754737	99.2453
EIO.MW17.36	06	B	0	0	0.000125546	0.00010677	9.24377e-05	0	0	0.000108544	0.00688256	0.000246293	0.00465612	0.0194344	0.0195775	0.00465612	9.24377e-05	0.000108544	0.0071631	0.0244346	80.122	19.0554	0.378307	0.444222	22.6697	19.4997	80.5003	0.822529	99.1775
EIO.MW17.36	07	A	0	0.000102834	0	0	0.0209815	0	0	0.00996923	0.000877429	6.63599e-05	0.005981	0.00932075	0.00932075	0.005981	0.0210987	0.00996923	0.000953016	0.0463697	20.101	12.8985	45.5011	21.4995	2.01387	34.398	65.602	67.0005	32.9995
EIO.MW17.36	07	B	0	7.16643e-05	0	0	0.0172243	0	0	0.00839913	0.000930481	6.26185e-05	0.00500068	0.00829574	0.00829574	0.00500068	0.017306	0.00839913	0.00100181	0.0390015	21.2703	12.8218	44.3725	21.5354	2.50431	34.3572	65.6428	65.9079	34.0921
EIO.MW17.36	08	A	0	0	0	0	0.0071302	0	0	0.00533002	0.00123557	9.52883e-05	0.00267537	0.00261086	0.00261086	0.00267537	0.0071302	0.00533002	0.00134411	0.0177465	14.712	15.0755	40.1781	30.0343	7.04071	45.1098	54.8902	70.2124	29.7876
EIO.MW17.36	08	B	0	0	0	0	0.00630387	0	0	0.00456789	0.00118885	6.87043e-05	0.00234184	0.00228344	0.00228344	0.00234184	0.00630387	0.00456789	0.00126711	0.015497	14.7347	15.1115	40.6779	29.4759	7.55844	44.5874	55.4126	70.1538	29.8462
EIO.MW17.36	09	A	0	0	8.21602e-05	6.07712e-05	8.01626e-05	0.000115725	0	0.00026684	0.0119957	0.000358839	0.0282454	0.0170943	0.017188	0.028379	8.01626e-05	0.00026684	0.0124045	0.045914	37.4352	61.809	0.174593	0.581174	21.2703	62.3902	37.6098	0.755767	99.2442
EIO.MW17.36	09	B	0	0	8.11331e-05	6.39864e-05	8.32069e-05	0.000149173	0	0.000297174	0.0134535	0.000398642	0.0301926	0.0197216	0.0198141	0.0303647	8.32069e-05	0.000297174	0.0139076	0.0505592	39.1899	60.0578	0.164573	0.587774	21.5732	60.6456	39.3544	0.752347	99.2477
EIO.MW17.50	01	A	0	0	0	0	6.94441e-05	0.000225035	0	0.000230376	0	0	0.0472917	0.00820018	0.00820018	0.0475513	6.94441e-05	0.000230376	0	0.0560513	14.6298	84.8353	0.123894	0.41101	0	85.2463	14.7537	0.534903	99.4651
EIO.MW17.50	01	B	0	0	0	0	5.68721e-05	0.000201313	0	0.000210499	0	0	0.0406989	0.00730149	0.00730149	0.0409312	5.68721e-05	0.000210499	0	0.0485	15.0546	84.3941	0.117262	0.434018	0	84.8281	15.1719	0.55128	99.4487
EIO.MW17.50	02	A	0	0	0	0	4.24391e-05	0.000201721	0	0.000143843	0	0	0.01683	0.00280102	0.00280102	0.0170627	4.24391e-05	0.000143843	0	0.02005	13.9702	85.1007	0.211667	0.717421	0	85.8181	14.1819	0.929087	99.0709
EIO.MW17.50	02	B	0	0	0	0	4.71755e-05	0.000153202	0	0.000108116	0	0	0.0114866	0.00190083	0.00190083	0.0116634	4.71755e-05	0.000108116	0	0.0137195	13.855	85.0131	0.343858	0.788046	0	85.8012	14.1988	1.1319	98.8681
EIO.MW17.50	03	A	0	0	0	0	2.76209e-05	9.31612e-05	0	0.000149991	0.000130282	0	0.0223	0.00421327	0.00421327	0.0224075	2.76209e-05	0.000149991	0.000130282	0.0267983	15.7221	83.6151	0.103069	0.559704	0.483805	84.1748	15.8252	0.662773	99.3372
EIO.MW17.50	03	B	0	0	0	0	2.48903e-05	0.000113444	0	0.000171257	0.000249126	0	0.0292721	0.00536701	0.00536701	0.029403	2.48903e-05	0.000171257	0.000249126	0.0349661	15.3492	84.0899	0.0711841	0.48978	0.707439	84.5796	15.4204	0.560964	99.439
EIO.MW17.50	04	A	0	0	0	0	3.94734e-05	0.000129518	0	0.000322986	0.000443558	0	0.0786746	0.013396	0.013396	0.078824	3.94734e-05	0.000322986	0.000443558	0.0925825	14.4693	85.1392	0.0426359	0.348863	0.47681	85.4881	14.5119	0.391499	99.6085
EIO.MW17.50	04	B	0	0	0	0	6.45286e-05	0.000151822	0	0.000332878	0.000780086	0	0.0870725	0.0153319	0.0153319	0.0872476	6.45286e-05	0.000332878	0.000780086	0.102977	14.8886	84.7254	0.0626632	0.323255	0.751839	85.0487	14.9513	0.385918	99.6141
EIO.MW17.50	05	A	0	0	0	0	3.24748e-05	0.000160578	0	0.000207251	8.53173e-05	0	0.0488432	0.00626699	0.00626699	0.0490285	3.24748e-05	0.000207251	8.53173e-05	0.0555352	11.2847	88.2836	0.0584761	0.373189	0.153392	88.6568	11.3432	0.431665	99.5683
EIO.MW17.50	05	B	0	0	0	0	4.07492e-05	0.000137026	0	0.000195363	0.000112575	0	0.0438398	0.00521043	0.00521043	0.0439978	4.07492e-05	0.000195363	0.000112575	0.0494444	10.538	88.9845	0.0824142	0.395117	0.227163	89.3796	10.6204	0.477532	99.5225
EIO.MW17.50	06	A	0	0	0	0	3.98132e-05	0.000197327	0	0.000216302	9.85704e-05	0	0.052571	0.00901537	0.00901537	0.0527986	3.98132e-05	0.000216302	9.85704e-05	0.0620701	14.5245	85.0629	0.0641424	0.348481	0.158553	85.4114	14.5886	0.412623	99.5874
EIO.MW17.50	06	B	0	0	0	0	3.50025e-05	0.000151794	0	0.000181779	0.000107997	0	0.0420598	0.00667811	0.00667811	0.0422349	3.50025e-05	0.000181779	0.000107997	0.0491298	13.5928	85.966	0.0712448	0.369998	0.219337	86.336	13.664	0.441243	99.5588
EIO.MW17.50	07	A	0	0	0	0	2.33168e-05	0.000189421	0	0.000196281	4.00044e-05	0	0.0427793	0.00465878	0.00465878	0.0429978	2.33168e-05	0.000196281	4.00044e-05	0.0478762	9.7309	89.8104	0.0487023	0.409975	0.0834882	90.2204	9.7796	0.458678	99.5413
EIO.MW17.50	07	B	0	0	0	0	3.68604e-05	0.000165687	0	0.000234501	6.40101e-05	0	0.0474453	0.00472529	0.00472529	0.0476365	3.68604e-05	0.000234501	6.40101e-05	0.0526331	8.97779	90.5066	0.0700328	0.445539	0.121468	90.9522	9.04782	0.515572	99.4844
EIO.MW17.50	08	A	0	0	0.0001343	0.000144884	7.89488e-05	0.000345851	0	0.00100321	4.12351e-05	0.000108946	0.0448068	0.0177455	0.0178986	0.0452058	7.89488e-05	0.00100321	0.000165331	0.0641865	27.8852	70.4288	0.122999	1.56297	0.256918	71.9918	28.0082	1.68596	98.314
EIO.MW17.50	08	B	0	0	0.000160756	0.000183579	8.13415e-05	0.000413954	0	0.00115296	3.63271e-05	9.42091e-05	0.0484256	0.0186986	0.0188818	0.0489031	8.13415e-05	0.00115296	0.000143637	0.0690193	27.3573	70.8543	0.117853	1.67049	0.207679	72.5248	27.4752	1.78834	98.2117
EIO.MW17.50	09	A	0	0	0	0	5.32882e-05	0.000177253	0	0.000317348	0.000140967	0.000105853	0.0556511	0.00899346	0.00899346	0.0558556	5.32882e-05	0.000317348	0.00026154	0.0652197	13.7895	85.6422	0.0817057	0.486584	0.399413	86.1288	13.8712	0.56829	99.4317
EIO.MW17.50	09	B	0	0	0	0	4.03795e-05	0.000165939	0	0.000291086	7.69694e-05	6.79214e-05	0.0506033	0.00854176	0.00854176	0.0507947	4.03795e-05	0.000291086	0.000154336	0.0596679	14.3155	85.129	0.0676736	0.487844	0.257991	85.6168	14.3832	0.555518	99.4445
EIO.MW17.50	10	A	0	0	0	0	4.04481e-05	0.000162657	0	0.000207665	9.46177e-05	0	0.0396205	0.00728581	0.00728581	0.0398081	4.04481e-05	0.000207665	9.46177e-05	0.047342	15.3897	84.0862	0.0854381	0.438648	0.199461	84.5248	15.4752	0.524086	99.4759
EIO.MW17.50	10	B	0	0	0	0	4.07212e-05	0.000163755	0	0.000218892	0.000111676	0	0.0381894	0.00706696	0.00706696	0.0383783	4.07212e-05	0.000218892	0.000111676	0.0457049	15.4621	83.9698	0.089096	0.478924	0.243746	84.4488	15.5512	0.56802	99.432
EIO.MW17.14	01	A	0	0	6.14955e-05	0.000248257	0.000200483	0.000105754	0	0.000182283	0.000994851	0.000178474	0.0236995	0.0152124	0.0152825	0.0238215	0.000200483	0.000182283	0.00119814	0.0394868	38.7029	60.3278	0.507723	0.461631	2.94494	60.7894	39.2106	0.969354	99.0306
EIO.MW17.14	01	B	0	0	6.08955e-05	0.00026052	0.000227079	0.000114276	0	0.000170152	0.0010913	0.000169116	0.0216287	0.0148707	0.0149401	0.0217606	0.000227079	0.000170152	0.00128394	0.0370979	40.2721	58.6571	0.612107	0.458658	3.34517	59.1158	40.8842	1.07076	98.9292
EIO.MW17.14	02	A	0	0	5.48364e-05	0.00019249	0.000186828	0.000114858	0	0.000156188	0.000403011	0	0.0211735	0.0168771	0.0169396	0.021306	0.000186828	0.000156188	0.000403011	0.0385886	43.8979	55.2132	0.484154	0.404752	1.03358	55.618	44.382	0.888905	99.1111
EIO.MW17.14	02	B	0	0	5.53657e-05	0.000167402	0.000152505	0.000123336	0	0.000152177	0.000447771	0	0.0214412	0.0169528	0.0170159	0.0215835	0.000152505	0.000152177	0.000447771	0.038904	43.7381	55.4788	0.392004	0.391159	1.13787	55.8699	44.1301	0.783163	99.2168
EIO.MW17.14	03	A	0	0	0	0.000327348	0.0130334	0	0	0.00370317	0.00194682	0.000148729	0.0110574	0.0111905	0.0111905	0.0110574	0.0130334	0.00370317	0.00211624	0.0389846	28.705	28.3636	33.4323	9.49907	5.14889	37.8627	62.1373	42.9314	57.0686
EIO.MW17.14	03	B	0	0	0	0.000271792	0.0107848	0	0	0.00300257	0.000973299	0.000128921	0.00879367	0.00918676	0.00918676	0.00879367	0.0107848	0.00300257	0.00112015	0.0317678	28.9184	27.681	33.9489	9.45161	3.40595	37.1327	62.8673	43.4005	56.5995
EIO.MW17.14	04	A	0	0	0	0.000103147	0.000113475	0	0	0.000128147	0.00130411	0.000392246	0.0176491	0.0314012	0.0314012	0.0176491	0.000113475	0.000128147	0.0017509	0.0492919	63.7045	35.8053	0.230211	0.259976	3.43026	36.0653	63.9347	0.490186	99.5098
EIO.MW17.14	04	B	0	0	0	8.79942e-05	0.000105917	0	0	0.0001158	0.00211378	0.000431948	0.0198811	0.0348157	0.0348157	0.0198811	0.000105917	0.0001158	0.0026058	0.0549186	63.3952	36.2011	0.192863	0.210858	4.5299	36.412	63.588	0.403721	99.5963
EIO.MW17.14	05	A	0	9.31342e-05	0.000123044	0.000518367	0.0286968	0	0	0.000534989	0.0117538	0.000205909	0.00160899	0.0292399	0.0293801	0.00160899	0.028803	0.000534989	0.0119884	0.0603271	48.7014	2.66711	47.7447	0.886814	16.5779	3.55392	96.4461	48.6315	51.3685
EIO.MW17.14	05	B	0	8.60728e-05	0.000127976	0.000588156	0.025648	0	0	0.00047521	0.00684452	0.000177106	0.0014238	0.0249587	0.0251046	0.0014238	0.0257461	0.00047521	0.00704625	0.0527497	47.5919	2.69917	48.808	0.900877	11.7838	3.60004	96.4	49.7089	50.2911
EIO.MW17.14	06	A	0	0	0	0.00043663	0.012081	0	0	0.00367865	0.00424547	0	0.0148004	0.00862613	0.00862613	0.0148004	0.012081	0.00367865	0.00424547	0.0391861	22.0132	37.7694	30.8297	9.38764	9.77508	47.1571	52.8429	40.2173	59.7827
EIO.MW17.14	06	B	0	0	0	0.000489685	0.00743846	0	0	0.0018069	0.00056735	0	0.00921704	0.00542175	0.00542175	0.00921704	0.00743846	0.0018069	0.00056735	0.0238842	22.7002	38.5906	31.1439	7.56527	2.32031	46.1559	53.8441	38.7092	61.2908
EIO.MW17.14	07	A	0	0	9.20239e-05	0.000207929	0.00720137	0	0	0.00496795	0.000309301	0.000263561	0.00812198	0.0102606	0.0103655	0.00812198	0.00720137	0.00496795	0.000609512	0.0306568	33.8114	26.4933	23.4903	16.2051	1.94942	42.6983	57.3017	39.6953	60.3047
EIO.MW17.14	07	B	0	0	8.21123e-05	0.000154861	0.00743536	0	0	0.00468617	0.000414196	0.000211168	0.00719896	0.00973502	0.00982862	0.00719896	0.00743536	0.00468617	0.000654729	0.0291491	33.7184	24.697	25.508	16.0766	2.1968	40.7736	59.2264	41.5846	58.4154
EIO.MW17.14	08	A	0	0	0	0	0.0102431	0	0	0.00487911	0.000569614	0	0.00363894	0.00693811	0.00693811	0.00363894	0.0102431	0.00487911	0.000569614	0.0256993	26.9973	14.1597	39.8576	18.9854	2.1684	33.1451	66.8549	58.843	41.157
EIO.MW17.14	08	B	0	0	0	0	0.0106774	0	0	0.00513061	0.000738413	0	0.00391803	0.00729555	0.00729555	0.00391803	0.0106774	0.00513061	0.000738413	0.0270216	26.999	14.4996	39.5143	18.9871	2.65999	33.4867	66.5133	58.5014	41.4986
EIO.MW17.14	09	A	0	0	0	0.000314619	0.000216822	0.000130457	0	0.000185278	0.0013718	0	0.0280011	0.0156672	0.0156672	0.0281516	0.000216822	0.000185278	0.0013718	0.0442209	35.4295	63.6612	0.490316	0.418984	3.00881	64.0802	35.9198	0.909299	99.0907
EIO.MW17.14	09	B	0	0	0	0.000271309	0.00018275	0.000108985	0	0.00016517	0.00103239	0	0.0227718	0.0143516	0.0143516	0.0228975	0.00018275	0.00016517	0.00103239	0.037597	38.1721	60.9025	0.486075	0.439318	2.67254	61.3418	38.6582	0.925392	99.0746
EIO.MW17.14	10	A	0	0	0	0.000873421	0.00644569	0.000146022	0	0.00338368	0.00115958	0.000313924	0.024648	0.00586669	0.00586669	0.0248164	0.00644569	0.00338368	0.00151716	0.0405125	14.4812	61.2563	15.9104	8.35218	3.60973	69.6084	30.3916	24.2626	75.7374
EIO.MW17.14	10	B	0	0	0	0.00116001	0.005744	0.000190208	0	0.00283528	0.000273232	0.00031547	0.0231153	0.00570529	0.00570529	0.0233347	0.005744	0.00283528	0.000632572	0.0376193	15.1659	62.0286	15.2688	7.53677	1.6537	69.5653	30.4347	22.8055	77.1945
EIO.MW17.17	01	A	0	0	0	0	0.0274381	0	0	0.00165769	0.00333289	0	0.000153871	0.00117182	0.00117182	0.000153871	0.0274381	0.00165769	0.00333289	0.0304215	3.85196	0.505798	90.1932	5.44908	9.87396	5.95488	94.0451	95.6422	4.35776
EIO.MW17.17	01	B	0	0	0	0	0.0251	0	0	0.00145759	0.00240883	0	0.000153229	0.00116693	0.00116693	0.000153229	0.0251	0.00145759	0.00240883	0.0278777	4.18589	0.549646	90.036	5.22851	7.95346	5.77816	94.2218	95.2645	4.73554
EIO.MW17.17	02	A	0	0	0	0	0.0111676	0	0	0.00181775	0.000283498	0	0.000178496	0.000530026	0.000530026	0.000178496	0.0111676	0.00181775	0.000283498	0.0136939	3.87053	1.30348	81.5518	13.2742	2.02827	14.5777	85.4223	94.826	5.17401
EIO.MW17.17	02	B	0	0	0	0	0.0085419	0	0	0.00116804	0.000226887	0	0.000126924	0.000443839	0.000443839	0.000126924	0.0085419	0.00116804	0.000226887	0.0102807	4.3172	1.23459	83.0867	11.3615	2.15926	12.5961	87.4039	94.4482	5.55179
EIO.MW17.17	03	A	0	8.71683e-05	0	0	0.0279424	0	0	0.00175529	0.00023906	0	0.00022182	0.00114262	0.00114262	0.00022182	0.0280418	0.00175529	0.00023906	0.0311615	3.66678	0.711839	89.9885	5.63287	0.761323	6.34471	93.6553	95.6214	4.37862
EIO.MW17.17	03	B	0	9.27751e-05	0	0	0.028236	0	0	0.00153671	0.000218871	0	0.0001955	0.00114972	0.00114972	0.0001955	0.0283417	0.00153671	0.000218871	0.0312237	3.68222	0.626129	90.77	4.92163	0.6961	5.54776	94.4522	95.6917	4.30835
EIO.MW17.17	04	A	0	0.000134527	0	0.000144931	0.047619	0	0	0.000533074	0.00154563	0.000207637	9.27712e-05	0.00221012	0.00221012	9.27712e-05	0.0477723	0.000533074	0.00178214	0.0506083	4.36711	0.183312	94.3962	1.05333	3.40165	1.23664	98.7634	95.4496	4.55042
EIO.MW17.17	04	B	0	0.000154623	0	0.00015931	0.0462747	0	0	0.000517214	0.00134305	0.00021823	6.49541e-05	0.00212544	0.00212544	6.49541e-05	0.046451	0.000517214	0.00159163	0.0491586	4.32364	0.132132	94.4921	1.05213	3.1362	1.18427	98.8157	95.5442	4.45577
EIO.MW17.17	05	A	0	0	0	0.00044824	9.49497e-05	0	0	4.77214e-05	0.0151496	0.000232877	0	0	0	0	9.49497e-05	4.77214e-05	0.0154149	0.000142671	0	0	66.5515	33.4485	99.0829	33.4485	66.5515	100	0
EIO.MW17.17	05	B	0	0	0	0.000661091	0.000131142	0	0	5.92304e-05	0.0165136	0.000234137	0	0	0	0	0.000131142	5.92304e-05	0.0167803	0.000190373	0	0	68.8871	31.1129	98.8782	31.1129	68.8871	100	0
EIO.MW17.17	06	A	0	7.25621e-05	0	0	0.0422635	0	0	0.00068756	0.00139306	0	8.96549e-05	0.00186666	0.00186666	8.96549e-05	0.0423462	0.00068756	0.00139306	0.0449901	4.14905	0.199277	94.1234	1.52825	3.00336	1.72752	98.2725	95.6517	4.34832
EIO.MW17.17	06	B	0	8.89033e-05	0	0	0.0414123	0	0	0.000654733	0.00123544	0	0.000151605	0.00176114	0.00176114	0.000151605	0.0415136	0.000654733	0.00123544	0.0440811	3.99523	0.343923	94.1756	1.48529	2.72625	1.82922	98.1708	95.6608	4.33916
EIO.MW17.17	07	A	0	0.000111034	0	0	0.0405159	0	0	0.00102929	0.00382308	0.000127306	0.000126043	0.00183651	0.00183651	0.000126043	0.0406424	0.00102929	0.00396809	0.0436343	4.20887	0.288862	93.1434	2.35889	8.33591	2.64775	97.3522	95.5023	4.49774
EIO.MW17.17	07	B	0	8.70586e-05	0	0	0.0377806	0	0	0.000934	0.00276444	0.000106998	6.55594e-05	0.00167697	0.00167697	6.55594e-05	0.0378799	0.000934	0.00288631	0.0405564	4.13492	0.16165	93.4005	2.30297	6.64396	2.46462	97.5354	95.7034	4.29657
EIO.MW17.17	08	A	0	0.000130828	0	0	0.0405321	0	0	0.00209447	0.00685534	0.00012923	0.000134955	0.00182987	0.00182987	0.000134955	0.0406812	0.00209447	0.00700254	0.0447405	4.08995	0.301639	90.927	4.68137	13.5333	4.98301	95.017	95.6084	4.39159
EIO.MW17.17	08	B	0	0.000129821	0	0	0.0385616	0	0	0.00189173	0.00532739	0.000120073	0.000123644	0.00179607	0.00179607	0.000123644	0.0387096	0.00189173	0.00546416	0.042521	4.22397	0.290783	91.0363	4.44893	11.3872	4.73972	95.2603	95.4852	4.51475
EIO.MW17.17	09	A	0	7.50551e-05	0	0	0.0147429	0	0	0.000263629	0.00020779	0	0	0.000646471	0.000646471	0	0.0148285	0.000263629	0.00020779	0.0157386	4.10755	0	94.2174	1.67505	1.30305	1.67505	98.3249	95.8924	4.10755
EIO.MW17.17	09	B	0	8.44278e-05	0	0	0.0152096	0	0	0.00029925	0.0002706	0	0	0.000662497	0.000662497	0	0.0153058	0.00029925	0.0002706	0.0162676	4.0725	0	94.088	1.83955	1.63621	1.83955	98.1605	95.9275	4.0725
EIO.MW17.17	10	A	0	0.000109	0	0	0.0243364	0	0	0.000768432	0.000279189	0	0	0.00100452	0.00100452	0	0.0244607	0.000768432	0.000279189	0.0262336	3.82914	0	93.2417	2.92919	1.05303	2.92919	97.0708	96.1709	3.82914
EIO.MW17.17	10	B	0	0.000113562	0	0	0.0230986	0	0	0.000752528	0.000236309	0	0	0.00103359	0.00103359	0	0.023228	0.000752528	0.000236309	0.0250141	4.13203	0	92.8596	3.00841	0.935863	3.00841	96.9916	95.868	4.13203
EIO.MW17.07	01	A	0	0	0	0	8.96232e-05	0.000111296	0	0.000373473	2.92673e-05	0.000605734	0.0247707	0.0119097	0.0119097	0.0248991	8.96232e-05	0.000373473	0.000719235	0.0372719	31.9535	66.804	0.240458	1.00202	1.89317	67.806	32.194	1.24248	98.7575
EIO.MW17.07	01	B	0	0	0	0	7.75409e-05	0.000124708	0	0.00044043	6.49824e-05	0.000726706	0.0321401	0.0151832	0.0151832	0.032284	7.75409e-05	0.00044043	0.000892744	0.0479851	31.6414	67.2792	0.161594	0.917848	1.82648	68.197	31.803	1.07944	98.9206
EIO.MW17.07	02	A	0	0	7.233e-05	0	0.000101648	0	0	0.00011931	2.6641e-05	0.000282654	0.0129003	0.0197676	0.0198501	0.0129003	0.000101648	0.00011931	0.000348601	0.0329714	60.204	39.1259	0.308292	0.36186	1.04622	39.4878	60.5122	0.670152	99.3298
EIO.MW17.07	02	B	0	0	7.22042e-05	0	0.000100097	0	0	0.000118623	1.48346e-05	0.000256475	0.0126175	0.0202922	0.0203745	0.0126175	0.000100097	0.000118623	0.000306975	0.0332107	61.3493	37.9921	0.3014	0.357183	0.915859	38.3493	61.6507	0.658583	99.3414
EIO.MW17.07	03	A	0	0	0.000110357	0.000176817	5.51506e-05	9.4973e-05	0	0.000474177	4.72282e-05	0.000184112	0.0163576	0.0125233	0.0126491	0.0164671	5.51506e-05	0.000474177	0.000256943	0.0296455	42.6677	55.5468	0.186034	1.59949	0.85927	57.1462	42.8538	1.78552	98.2145
EIO.MW17.07	03	B	0	0	0.000126473	0.000104262	0.000102917	0.00012453	0	0.000584615	8.51988e-05	0.000231638	0.020682	0.0163338	0.016478	0.0208257	0.000102917	0.000584615	0.000349049	0.0379912	43.3732	54.8171	0.270898	1.53882	0.910398	56.3559	43.6441	1.80971	98.1903
EIO.MW17.07	04	A	0	0	0	8.08015e-05	8.36901e-05	0	0	0.000122754	5.27164e-05	0.000166358	0.0128207	0.0132625	0.0132625	0.0128207	8.36901e-05	0.000122754	0.000242208	0.0262896	50.4477	48.7671	0.318339	0.46693	0.912897	49.234	50.766	0.785269	99.2147
EIO.MW17.07	04	B	0	0	0	7.13404e-05	8.54828e-05	0	0	0.000131047	7.52314e-05	0.000124844	0.0101344	0.0095345	0.0095345	0.0101344	8.54828e-05	0.000131047	0.000217436	0.0198854	47.9471	50.964	0.429876	0.659011	1.08161	51.623	48.377	1.08889	98.9111
EIO.MW17.07	05	A	0	0	8.39379e-05	0.000226564	4.55062e-05	0	0	0.000335518	0	0.000493625	0.00514001	0.00399774	0.00409343	0.00514001	4.55062e-05	0.000335518	0.000562269	0.00961446	42.5757	53.4613	0.47331	3.48972	5.52504	56.951	43.049	3.96303	96.037
EIO.MW17.07	05	B	0	0	7.23467e-05	0.000162069	5.69332e-05	0	0	0.000341085	0	0.000677761	0.00579566	0.00380476	0.00388723	0.00579566	5.69332e-05	0.000341085	0.000772011	0.0100809	38.5603	57.4915	0.564763	3.38347	7.1134	60.8749	39.1251	3.94824	96.0518
EIO.MW17.07	06	A	0	0	0.000112271	0.000229382	0.000210274	0	0	0.000155727	0.00031974	0.000570397	0.0191076	0.0289416	0.0290696	0.0191076	0.000210274	0.000155727	0.000969457	0.0485431	59.884	39.3621	0.43317	0.320802	1.958	39.6829	60.3171	0.753972	99.246
EIO.MW17.07	06	B	0	0	0.000107544	0.000259169	0.000212847	0	0	0.000154509	0.000239264	0.000521345	0.0187836	0.0236826	0.0238052	0.0187836	0.000212847	0.000154509	0.000833107	0.0429561	55.4174	43.7274	0.495498	0.35969	1.90254	44.0871	55.9129	0.855189	99.1448
EIO.MW17.07	07	A	0	0	8.68667e-05	0.000868923	0.000148101	0.000141998	0	0.000230809	7.01487e-05	0.00029701	0.0112896	0.00505955	0.00515857	0.0114534	0.000148101	0.000230809	0.000408462	0.0169909	30.3609	67.409	0.871651	1.35843	2.34757	68.7675	31.2325	2.23009	97.7699
EIO.MW17.07	07	B	0	0	0.000162267	0.000961902	0.00021524	0.000133606	0	0.000215994	4.79891e-05	0.000361533	0.0103029	0.00503673	0.00522171	0.0104571	0.00021524	0.000215994	0.000459797	0.01611	32.4128	64.9104	1.33607	1.34075	2.77491	66.2511	33.7489	2.67681	97.3232
EIO.MW17.07	08	A	0	0	0	0	7.54407e-05	0.000109882	0	0.000133083	0	0.000128443	0.0172641	0.0118667	0.0118667	0.0173909	7.54407e-05	0.000133083	0.000146305	0.0294661	40.2724	59.0199	0.256025	0.451646	0.494065	59.4716	40.5284	0.707671	99.2923
EIO.MW17.07	08	B	0	0	0	0	7.08882e-05	0.000101218	0	0.000148687	0	0.00012812	0.023646	0.0153797	0.0153797	0.0237628	7.08882e-05	0.000148687	0.000145936	0.0393621	39.0724	60.3698	0.180093	0.377741	0.369384	60.7475	39.2525	0.557833	99.4422
EIO.MW17.07	09	A	0	0	0.000129915	0.00088905	0.000213582	0.000118811	0	0.000230382	2.10411e-05	0.000664494	0.0154904	0.00778239	0.00793048	0.0156274	0.000213582	0.000230382	0.00077794	0.0240019	33.0411	65.1092	0.889856	0.95985	3.13941	66.0691	33.9309	1.84971	98.1503
EIO.MW17.07	09	B	0	0	0.00015844	0.00104352	0.000258666	0.000130515	0	0.000295426	4.2106e-05	0.000947655	0.0224566	0.00958078	0.00976139	0.0226072	0.000258666	0.000295426	0.00112154	0.0329227	29.6494	68.6676	0.785678	0.897333	3.29437	69.5649	30.4351	1.68301	98.317
EIO.MW17.07	10	A	0	0	0	0	0.000125144	0.00011437	0	0.000215743	0.000641389	0.000478805	0.0445218	0.0354645	0.0354645	0.0446537	0.000125144	0.000215743	0.00118678	0.0804591	44.0777	55.4986	0.155538	0.26814	1.45357	55.7668	44.2332	0.423677	99.5763
EIO.MW17.07	10	B	0	0	0	0	0.000115933	8.20016e-05	0	0.000223011	0.000679212	0.000486351	0.0443171	0.0312697	0.0312697	0.0444117	0.000115933	0.000223011	0.0012332	0.0760204	41.1334	58.4208	0.152502	0.293357	1.5963	58.7141	41.2859	0.44586	99.5541
EIO.MW17.11	01	A	0	0	0.000192956	0	9.31501e-05	0.000321442	0	0.000187769	1.76956e-05	7.59699e-05	0.0354411	0.0253591	0.025579	0.035812	9.31501e-05	0.000187769	0.00010423	0.0616719	41.476	58.0685	0.151041	0.304464	0.168722	58.373	41.627	0.455505	99.5445
EIO.MW17.11	01	B	0	0	0.000218414	0	0.000112388	0.000356725	0	0.000234414	1.28488e-05	7.79229e-05	0.0396667	0.0270989	0.0273478	0.0400782	0.000112388	0.000234414	0.000101608	0.0677729	40.3522	59.1361	0.16583	0.345882	0.149699	59.482	40.518	0.511712	99.4883
EIO.MW17.11	02	A	0	0	9.68907e-05	0	5.42163e-05	0.000309524	0	0.000275031	7.38901e-05	0	0.0665913	0.0137273	0.0138377	0.0669484	5.42163e-05	0.000275031	7.38901e-05	0.0811154	17.0593	82.5348	0.0668385	0.339062	0.0910097	82.8739	17.1261	0.4059	99.5941
EIO.MW17.11	02	B	0	0	0.000119579	0	5.53974e-05	0.000374125	0	0.000257862	9.03552e-05	0	0.0607337	0.0125348	0.0126711	0.0611653	5.53974e-05	0.000257862	9.03552e-05	0.0741497	17.0885	82.489	0.0747103	0.347759	0.121707	82.8368	17.1632	0.42247	99.5775
EIO.MW17.11	03	A	0	0	8.59068e-05	0	4.82708e-05	0.00041019	0	0.000270299	0	0	0.0502006	0.00814943	0.00824735	0.0506738	4.82708e-05	0.000270299	0	0.0592397	13.922	85.5402	0.0814838	0.456281	0	85.9965	14.0035	0.537764	99.4622
EIO.MW17.11	03	B	0	0	8.58121e-05	0	5.70736e-05	0.000418393	0	0.000238636	0	0	0.0489142	0.00847416	0.00857198	0.0493969	5.70736e-05	0.000238636	0	0.0582646	14.7122	84.7803	0.0979559	0.409573	0	85.1899	14.8101	0.507529	99.4925
EIO.MW17.11	04	A	0	0	0.000189333	0	0.00011449	0.000682098	0	0.00021579	0.000202889	0.000170655	0.0983954	0.0228599	0.0230757	0.0991823	0.00011449	0.00021579	0.000397275	0.122588	18.8238	80.9068	0.0933941	0.176028	0.323026	81.0828	18.9172	0.269422	99.7306
EIO.MW17.11	04	B	0	0	0.000187099	0	7.6338e-05	0.000714782	0	0.000327012	0.000224839	0.000121954	0.0918691	0.0214404	0.0216537	0.0926937	7.6338e-05	0.000327012	0.000363752	0.114751	18.8702	80.7783	0.0665251	0.284976	0.315992	81.0633	18.9367	0.351501	99.6485
EIO.MW17.11	05	A	0	0	0.000384378	0	0.000177155	0.000462989	0	0.000245049	3.11172e-05	0.000137128	0.0590075	0.0543729	0.0548111	0.0595416	0.000177155	0.000245049	0.000187314	0.114775	47.7553	51.8769	0.15435	0.213504	0.162936	52.0904	47.9096	0.367854	99.6321
EIO.MW17.11	05	B	0	0	0.000332922	0	0.000161219	0.000418166	0	0.000229544	2.15541e-05	0.000110452	0.0532048	0.050649	0.0510285	0.0536872	0.000161219	0.000229544	0.000147366	0.105106	48.5493	51.0789	0.153386	0.218392	0.14001	51.2973	48.7027	0.371778	99.6282
EIO.MW17.11	06	A	0	0	0.000171519	0	8.97533e-05	0.000698115	0	0.000418356	0.000184562	0.000104756	0.096476	0.0209533	0.0211488	0.0972814	8.97533e-05	0.000418356	0.000303886	0.118938	17.7814	81.7914	0.0754621	0.351742	0.254848	82.1432	17.8568	0.427204	99.5728
EIO.MW17.11	06	B	0	0	0.000213724	0	7.96913e-05	0.000777294	0	0.000470376	0.000137623	7.09305e-05	0.107502	0.0199199	0.0201636	0.108399	7.96913e-05	0.000470376	0.000218417	0.129113	15.617	83.9569	0.0617223	0.364315	0.168882	84.3212	15.6788	0.426037	99.574
EIO.MW17.11	07	A	0	0	0.000313157	6.4071e-05	0.000147741	0.000531511	0	0.000295478	0.000232954	0	0.0760992	0.0487659	0.0491228	0.0767124	0.000147741	0.000295478	0.000232954	0.126278	38.9004	60.7486	0.116996	0.23399	0.184137	60.9826	39.0174	0.350986	99.649
EIO.MW17.11	07	B	0	0	0.000302243	7.40293e-05	0.000133122	0.000484198	0	0.000264938	0.000117441	0	0.0566542	0.0359719	0.0363165	0.0572128	0.000133122	0.000264938	0.000117441	0.0939273	38.6644	60.9118	0.141728	0.282067	0.124877	61.1938	38.8062	0.423795	99.5762
EIO.MW17.11	08	A	0	0	0.000277567	0	0.000167733	0.000455685	0	0.000273045	0.000194161	0	0.0650304	0.0436348	0.0439512	0.0655561	0.000167733	0.000273045	0.000194161	0.109948	39.9745	59.6246	0.152557	0.24834	0.176282	59.8729	40.1271	0.400897	99.5991
EIO.MW17.11	08	B	0	0	0.000245364	0	0.000148061	0.000412138	0	0.000255407	4.95071e-05	0	0.0475334	0.0336033	0.033883	0.0480089	0.000148061	0.000255407	4.95071e-05	0.0822954	41.1724	58.3373	0.179914	0.310354	0.0601217	58.6476	41.3524	0.490268	99.5097
EIO.MW17.11	09	A	0	0	0.000257904	8.1762e-05	3.90189e-05	0.000781542	0	0.000217596	1.84386e-05	0	0.0432822	0.0132026	0.0134966	0.0441838	3.90189e-05	0.000217596	1.84386e-05	0.057937	23.2953	76.2618	0.0673471	0.375573	0.0318151	76.6374	23.3626	0.44292	99.5571
EIO.MW17.11	09	B	0	0	0.000230458	6.62113e-05	6.94628e-05	0.000713584	0	0.000224471	2.16997e-05	0	0.0404758	0.0128012	0.0130639	0.041299	6.94628e-05	0.000224471	2.16997e-05	0.0546569	23.9017	75.5605	0.127089	0.410692	0.0396859	75.9712	24.0288	0.53778	99.4622
EIO.MW17.11	10	A	0	0	0.000101005	0	3.65413e-05	0.000627113	0	0.000280176	8.75853e-05	0	0.046936	0.00571747	0.0058326	0.0476595	3.65413e-05	0.000280176	8.75853e-05	0.0538088	10.8395	88.5719	0.0679095	0.520688	0.162507	89.0926	10.9074	0.588598	99.4114
EIO.MW17.11	10	B	0	0	0.000162803	0	4.20855e-05	0.00101464	0	0.000315762	0.000135662	0	0.0544577	0.00720572	0.0073913	0.0556282	4.20855e-05	0.000315762	0.000135662	0.0633773	11.6624	87.773	0.0664047	0.498226	0.213598	88.2712	11.7288	0.564631	99.4354
EIO.MW17.21	01	A	0.000211075	0.00027038	0.000137436	7.36642e-05	0.0304179	0.00015757	0	0.0148296	0.00329978	0.000220162	0.0103353	0.0102632	0.0104199	0.0105171	0.0307262	0.0150731	0.00355055	0.0667362	15.6135	15.7592	46.0412	22.5861	5.05153	38.3453	61.6547	68.6273	31.3727
EIO.MW17.21	01	B	0.000201211	0.000280804	0.00012668	0.000114657	0.0363004	0.000133989	0	0.0164349	0.00360535	0.000270028	0.0119679	0.0127886	0.012933	0.0121225	0.0366205	0.016667	0.00391293	0.078343	16.5082	15.4736	46.7438	21.2745	4.75702	36.7481	63.2519	68.0182	31.9818
EIO.MW17.21	02	A	0.000351382	0.000166993	0	0	0.0126823	9.26637e-05	0	0.0412807	0.000906539	0	0.00241264	0.000734125	0.000734125	0.00251954	0.0128726	0.0416861	0.000906539	0.0578124	1.26984	4.35813	22.2662	72.1058	1.54386	76.4639	23.5361	94.372	5.62797
EIO.MW17.21	02	B	0.00041285	0.000193927	0	0	0.0118639	9.64204e-05	0	0.0354271	0.000896801	0	0.00226828	0.000593299	0.000593299	0.00237952	0.012085	0.0359034	0.000896801	0.0509612	1.16422	4.66927	23.7141	70.4524	1.72934	75.1217	24.8783	94.1665	5.83348
EIO.MW17.21	03	A	0.000263976	0.000127005	0	0.000216613	0.00372718	0	0	0.0160255	0.000931227	0.000126764	0.00101751	0	0	0.00101751	0.00387196	0.01633	0.00107562	0.0212195	0	4.79516	18.2472	76.9576	4.82446	81.7528	18.2472	95.2048	4.79516
EIO.MW17.21	03	B	0.000216717	0.000115756	0	0.000340172	0.00176418	0	0	0.00846231	0.000295514	0.000141302	0.000546457	0	0	0.000546457	0.00189613	0.00871232	0.000456466	0.0111549	0	4.8988	16.9981	78.1031	3.93119	83.0019	16.9981	95.1012	4.8988
EIO.MW17.21	04	A	0.000369117	0.000148176	0	0.000154716	0.00824482	9.47992e-05	0	0.0244754	0.000709262	0.000135612	0.00167205	0.000444201	0.000444201	0.00178141	0.00841373	0.0249012	0.000863732	0.0355405	1.24984	5.01233	23.6736	70.0642	2.37261	75.0765	24.9235	93.7378	6.26217
EIO.MW17.21	04	B	0.000389098	0.000171305	0	0.000245927	0.00750188	0.000106017	0	0.0223385	0.0007434	0.000124456	0.00161673	0.000332082	0.000332082	0.00173903	0.00769715	0.0227873	0.000885163	0.0325556	1.02004	5.34173	23.6431	69.9951	2.64696	75.3369	24.6631	93.6382	6.36178
EIO.MW17.21	05	A	0.000292036	0.000153088	0	0	0.0190403	0	0	0.0318794	0.00189445	0	0.00168866	0.000765449	0.000765449	0.00168866	0.0192148	0.0322163	0.00189445	0.0538852	1.42052	3.13382	35.6588	59.7869	3.39631	62.9207	37.0793	95.4457	4.55434
EIO.MW17.21	05	B	0.000264131	0.000161083	0	0	0.0196435	0	0	0.0345109	0.00223768	0	0.00188504	0.000923072	0.000923072	0.00188504	0.0198272	0.0348156	0.00223768	0.0574508	1.60672	3.28114	34.5115	60.6006	3.74893	63.8818	36.1182	95.1121	4.88786
EIO.MW17.21	06	A	0.000384121	0.000122372	0	8.88987e-05	0.00688829	8.7661e-05	0	0.0406612	0.00309318	9.6614e-05	0.00245545	0.000204389	0.000204389	0.00255658	0.00702779	0.0411043	0.00320323	0.0508931	0.401604	5.02343	13.8089	80.7661	5.92135	85.7895	14.2105	94.575	5.42503
EIO.MW17.21	06	B	0.000396255	0.00014425	0	0.000130988	0.00810238	0.000112147	0	0.0417947	0.00337183	0.000165402	0.00266644	0.000502676	0.000502676	0.00279582	0.00826681	0.0422518	0.00356023	0.0538171	0.934045	5.19503	15.3609	78.51	6.20494	83.705	16.295	93.8709	6.12907
EIO.MW17.21	07	A	0.000409482	7.39432e-05	0	0.000166241	0.00597841	0	0	0.0393299	0.00278247	0	0.0026361	0.000402696	0.000402696	0.0026361	0.0060627	0.0398023	0.00278247	0.0489038	0.823446	5.39037	12.3972	81.389	5.38339	86.7794	13.2206	93.7862	6.21382
EIO.MW17.21	07	B	0.000344735	8.81281e-05	0	0.000131592	0.00431959	0	0	0.0262383	0.00101707	0	0.00173536	0.000367861	0.000367861	0.00173536	0.00442005	0.026636	0.00101707	0.0331593	1.10938	5.23342	13.3298	80.3275	2.97595	85.5609	14.4391	93.6572	6.34279
EIO.MW17.21	08	A	0.000143531	0	0	0.000179871	0.00135834	0.000110517	0	0.00479616	0.000285543	0.000113961	0.00514244	0.00103193	0.00103193	0.00526993	0.00135834	0.00496174	0.000415352	0.0126219	8.17569	41.7521	10.7618	39.3104	3.18587	81.0626	18.9374	50.0722	49.9278
EIO.MW17.21	08	B	0.000114985	0	0	0.000227559	0.00110665	0.000167264	0	0.00405319	0.000422743	0.000103983	0.00508541	0.00103203	0.00103203	0.00527837	0.00110665	0.00418584	0.000541186	0.0116029	8.89462	45.4918	9.53773	36.0758	4.45638	81.5676	18.4324	45.6135	54.3865
EIO.MW17.21	09	A	0.000175713	0.000121118	0	0.000497204	0.00436967	0	0	0.00485393	0.000282815	0.000228826	0.000440484	0.000316736	0.000316736	0.000440484	0.00450774	0.00505664	0.000543462	0.0103216	3.06867	4.2676	43.6729	48.9909	5.00193	53.2585	46.7415	92.6637	7.33627
EIO.MW17.21	09	B	0.000148644	0.000104032	0	0.000434947	0.00365762	0	0	0.00403908	0.000256107	0.000240708	0.000391929	0.000308416	0.000308416	0.000391929	0.00377621	0.00421056	0.000530287	0.00868711	3.55027	4.51161	43.4691	48.469	5.75311	52.9806	47.0194	91.9381	8.06188
EIO.MW17.21	10	A	0.000148334	0	0	8.53834e-05	0.000348651	0	0	0.00443129	0.000942914	0	0.000285985	0.000430609	0.000430609	0.000285985	0.000348651	0.00460242	0.000942914	0.00566766	7.59766	5.0459	6.15158	81.2049	14.2637	86.2508	13.7492	87.3564	12.6436
EIO.MW17.21	10	B	0.000149378	0	0	0.000111314	0.000373899	0	0	0.00524116	0.00105498	0	0.000301541	0.000474611	0.000474611	0.000301541	0.000373899	0.00541349	0.00105498	0.00656354	7.23102	4.59418	5.69661	82.4782	13.8475	87.0724	12.9276	88.1748	11.8252
EIO.MW17.44	01	A	0	0.000118985	0	0	0.0240243	0	0	0.000592749	0.000303708	0	0.000551317	0.00677166	0.00677166	0.000551317	0.0241599	0.000592749	0.000303708	0.0320756	21.1115	1.7188	75.3217	1.84797	0.937968	3.56677	96.4332	77.1697	22.8303
EIO.MW17.44	01	B	0	0.000135893	0	0	0.031598	0	0	0.000774139	0.00077805	0	0.000824279	0.0112411	0.0112411	0.000824279	0.0317529	0.000774139	0.00077805	0.0445925	25.2086	1.84847	71.2069	1.73603	1.71488	3.5845	96.4155	72.9429	27.0571
EIO.MW17.44	02	A	0	0.000547079	0	0	0.0755722	0	0	0.0033616	0.00038304	0	0.000526102	0.00224592	0.00224592	0.000526102	0.0761958	0.0033616	0.00038304	0.0823295	2.72797	0.63902	92.5499	4.0831	0.463098	4.72212	95.2779	96.633	3.36699
EIO.MW17.44	02	B	0	0.000392209	0	0	0.0619644	0	0	0.00265426	0.000218084	0	0.000460339	0.00202083	0.00202083	0.000460339	0.0624115	0.00265426	0.000218084	0.0675469	2.99174	0.681509	92.3972	3.92951	0.321824	4.61102	95.389	96.3268	3.67325
EIO.MW17.44	03	A	0	0.000688161	0	0	0.0797576	0	0	0.00163852	0.000617189	0	0.000261916	0.0028067	0.0028067	0.000261916	0.0805421	0.00163852	0.000617189	0.0852492	3.29235	0.307235	94.4784	1.92204	0.718778	2.22928	97.7707	96.4004	3.59959
EIO.MW17.44	03	B	0	0.00119974	0	0	0.0925885	0	0	0.00207289	0.000889203	0	0.000308118	0.00323484	0.00323484	0.000308118	0.0939561	0.00207289	0.000889203	0.0995719	3.24875	0.309443	94.36	2.0818	0.885122	2.39124	97.6088	96.4418	3.55819
EIO.MW17.44	04	A	0	0.000264994	0	0	0.0423859	0	0	0.00103344	0.000295634	0	0.000218294	0.00153959	0.00153959	0.000218294	0.042688	0.00103344	0.000295634	0.0454793	3.38525	0.479984	93.8624	2.27233	0.645842	2.75231	97.2477	96.1348	3.86524
EIO.MW17.44	04	B	0	0.000264387	0	0	0.0505392	0	0	0.00142035	0.000508169	0	0.000209913	0.00170722	0.00170722	0.000209913	0.0508406	0.00142035	0.000508169	0.0541781	3.15112	0.38745	93.8398	2.62163	0.929243	3.00908	96.9909	96.4614	3.53857
EIO.MW17.44	05	A	0	0.000236392	6.56719e-05	0	0.04537	0	0	0.000827406	0.000299621	0	0.000717704	0.0147302	0.014805	0.000717704	0.0456395	0.000827406	0.000299621	0.0619896	23.8831	1.15778	73.6244	1.33475	0.481016	2.49253	97.5075	74.9591	25.0409
EIO.MW17.44	05	B	0	0.000254607	9.74476e-05	0	0.0392294	0	0	0.000757573	0.000401961	0	0.000712086	0.0125704	0.0126814	0.000712086	0.0395196	0.000757573	0.000401961	0.0536707	23.6282	1.32677	73.6335	1.41152	0.743371	2.73829	97.2617	75.045	24.955
EIO.MW17.44	06	A	0	0	0.000358031	0	0.000243892	0	0	0	0.0025655	7.38321e-05	0.000963298	0.0542961	0.0547042	0.000963298	0.000243892	0	0.0026496	0.0559114	97.8409	1.7229	0.436211	0	4.52451	1.7229	98.2771	0.436211	99.5638
EIO.MW17.44	06	B	0	0	0.000332181	0	0.000272282	0	0	0	0.00558237	8.51538e-05	0.00124676	0.0849941	0.0853727	0.00124676	0.000272282	0	0.00567936	0.0868918	98.2518	1.43485	0.313357	0	6.13513	1.43485	98.5652	0.313357	99.6866
EIO.MW17.44	07	A	0	0.00034081	0.000100405	0	0.0615781	0	0	0.00211037	0.00279539	7.76251e-05	0.0013441	0.0161966	0.016311	0.0013441	0.0619665	0.00211037	0.00288381	0.081732	19.9567	1.64452	75.8167	2.58206	3.40812	4.22658	95.7734	78.3988	21.6012
EIO.MW17.44	07	B	0	0.000350251	0.000103743	0	0.0624329	0	0	0.00206776	0.00231675	9.07093e-05	0.00131248	0.0149795	0.0150978	0.00131248	0.0628322	0.00206776	0.00242007	0.0813102	18.5681	1.61417	77.2746	2.54305	2.89031	4.15721	95.8428	79.8177	20.1823
EIO.MW17.44	08	A	0	0.00037453	0.000119495	0	0.0573489	0	0	0.0014173	0.000599262	0	0.00121944	0.017189	0.0173252	0.00121944	0.0577758	0.0014173	0.000599262	0.0777378	22.2868	1.56866	74.3214	1.82318	0.764979	3.39184	96.6082	76.1446	23.8554
EIO.MW17.44	08	B	0	0.000395826	0.000120162	0	0.0494861	0	0	0.00139419	0.000764694	0	0.00118337	0.0140613	0.0141982	0.00118337	0.0499374	0.00139419	0.000764694	0.0667131	21.2825	1.77382	74.8538	2.08983	1.13325	3.86365	96.1363	76.9437	23.0563
EIO.MW17.44	09	A	0	0	0.000312172	0	0.000158706	0	0	0	0.00302611	6.23642e-05	0.00190068	0.0295346	0.0298905	0.00190068	0.000158706	0	0.00309715	0.0319499	93.5543	5.94894	0.496735	0	8.83712	5.94894	94.0511	0.496735	99.5033
EIO.MW17.44	09	B	0	0	0.000244681	0	0.000143821	0	0	0	0.00352892	7.63904e-05	0.00190636	0.0315344	0.0318133	0.00190636	0.000143821	0	0.00361593	0.0338635	93.9457	5.62955	0.424707	0	9.64777	5.62955	94.3704	0.424707	99.5753
EIO.MW17.44	10	A	0	0.000534444	0.00012773	0	0.0740758	0	0	0.000928524	0.0108732	5.78541e-05	0.000790102	0.0210051	0.0211507	0.000790102	0.074685	0.000928524	0.0109391	0.0975544	21.681	0.809909	76.5573	0.951802	10.0828	1.76171	98.2383	77.5091	22.4909
EIO.MW17.44	10	B	0	0.000455832	0.000115241	0	0.0574707	0	0	0.000719073	0.00643367	6.04179e-05	0.000685028	0.0145512	0.0146826	0.000685028	0.0579903	0.000719073	0.00650249	0.074077	19.8207	0.924752	78.2838	0.97071	8.06966	1.89546	98.1045	79.2545	20.7455
EIO.MW17.51	01	A	0	0.000258766	0	0	0.0673026	0	0	0.00239437	0.00298953	0.000113033	0.000281769	0.00258864	0.00258864	0.000281769	0.0675976	0.00239437	0.00311828	0.0728624	3.55279	0.386714	92.7743	3.28616	4.10405	3.67287	96.3271	96.0605	3.9395
EIO.MW17.51	01	B	0	0.000205825	0	0	0.0645053	0	0	0.00221045	0.00299194	6.3722e-05	0.000359999	0.00227159	0.00227159	0.000359999	0.0647399	0.00221045	0.00306453	0.0695819	3.26462	0.517375	93.0412	3.17676	4.21841	3.69413	96.3059	96.218	3.782
EIO.MW17.51	02	A	0	0.00036525	0	0	0.0746118	0	0	0.00245439	0.0034017	0.000139479	0.000379057	0.00261846	0.00261846	0.000379057	0.0750281	0.00245439	0.00356058	0.08048	3.25355	0.470995	93.2258	3.04969	4.23673	3.52069	96.4793	96.2755	3.72455
EIO.MW17.51	02	B	0	0.000461708	0	0	0.124427	0	0	0.0041231	0.00824503	0.000273756	0.00064953	0.00389767	0.00389767	0.00064953	0.124953	0.0041231	0.00855685	0.133623	2.91691	0.48609	93.5114	3.08561	6.01832	3.5717	96.4283	96.597	3.403
EIO.MW17.51	03	A	0	0.000331589	0	0	0.11008	0	0	0.00108631	0.0135427	0	0	0.00369487	0.00369487	0	0.110458	0.00108631	0.0135427	0.115239	3.20625	0	95.8511	0.942655	10.5159	0.942655	99.0573	96.7937	3.20625
EIO.MW17.51	03	B	0	0.000365276	0	0	0.106491	0	0	0.0009825	0.0133293	0	0	0.00326635	0.00326635	0	0.106907	0.0009825	0.0133293	0.111156	2.93852	0	96.1776	0.88389	10.7075	0.88389	99.1161	97.0615	2.93852
EIO.MW17.51	04	A	0	0.000131833	0	0	0.0455434	0	0	0.00460615	0.0026797	0	0.000552077	0.00159214	0.00159214	0.000552077	0.0456937	0.00460615	0.0026797	0.052444	3.03589	1.0527	87.1284	8.78298	4.86124	9.83568	90.1643	95.9114	4.08858
EIO.MW17.51	04	B	0	0.000179504	0	0	0.0413739	0	0	0.00327321	0.00200552	0	0.000521396	0.00148104	0.00148104	0.000521396	0.0415785	0.00327321	0.00200552	0.0468541	3.16097	1.11281	88.7403	6.98595	4.10464	8.09875	91.9012	95.7262	4.27377
EIO.MW17.51	05	A	0	0.000298505	0	0	0.109871	0	0	0.00584671	0.0169545	0.000525987	0.00062784	0.00346963	0.00346963	0.00062784	0.110211	0.00584671	0.0175536	0.120156	2.88761	0.522523	91.7239	4.86595	12.7469	5.38848	94.6115	96.5899	3.41014
EIO.MW17.51	05	B	0	0.000163428	0	0	0.0570366	0	0	0.00252659	0.0045966	0.000274403	0.000345097	0.00184793	0.00184793	0.000345097	0.0572229	0.00252659	0.00490917	0.0619425	2.9833	0.557125	92.3806	4.07893	7.34337	4.63606	95.3639	96.4596	3.54042
EIO.MW17.51	06	A	0	0.000295767	0	0	0.11058	0	0	0.00577835	0.0119436	0.000223464	0.000755518	0.00352741	0.00352741	0.000755518	0.110917	0.00577835	0.0121982	0.120978	2.91573	0.624507	91.6834	4.77635	9.15939	5.40085	94.5991	96.4598	3.54024
EIO.MW17.51	06	B	0	0.000304985	0	0	0.129232	0	0	0.00725092	0.0151971	0.000218207	0.000803793	0.00406142	0.00406142	0.000803793	0.12958	0.00725092	0.0154456	0.141696	2.86629	0.567266	91.4492	5.11724	9.82912	5.68451	94.3155	96.5664	3.43356
EIO.MW17.51	07	A	0	0.000338326	0	0	0.124431	0	0	0.00146489	0.0150394	0.000176606	0.000301231	0.00414156	0.00414156	0.000301231	0.124817	0.00146489	0.0152406	0.130724	3.16816	0.230432	95.4808	1.1206	10.4412	1.35103	98.649	96.6014	3.39859
EIO.MW17.51	07	B	0	0.000286057	0	0	0.117773	0	0	0.00137048	0.0133909	0.000177395	0.000323166	0.00376624	0.00376624	0.000323166	0.118099	0.00137048	0.0135929	0.123559	3.04814	0.261549	95.5811	1.10917	9.91087	1.37072	98.6293	96.6903	3.30969
EIO.MW17.51	08	A	0	0.000236632	0	0	0.0941389	0	0	0.00518635	0.0124843	0.000170325	0.000509422	0.0033755	0.0033755	0.000509422	0.0944087	0.00518635	0.0126783	0.10348	3.26198	0.492291	91.2338	5.01193	10.9147	5.50423	94.4958	96.2457	3.75427
EIO.MW17.51	08	B	0	0.000215798	0	0	0.0781553	0	0	0.00378519	0.00627617	0.00011475	0.000473183	0.00301969	0.00301969	0.000473183	0.0784013	0.00378519	0.00640688	0.0856794	3.52441	0.552272	91.5055	4.41785	6.95748	4.97012	95.0299	95.9233	4.07668
EIO.MW17.51	09	A	0	0.00017353	0	0	0.0600371	0	0	0.000537164	0.00354197	0.00016997	8.41516e-05	0.0019375	0.0019375	8.41516e-05	0.0602349	0.000537164	0.00373558	0.0627938	3.0855	0.134013	95.925	0.855442	5.61493	0.989454	99.0105	96.7805	3.21951
EIO.MW17.51	09	B	0	0.000206978	0	0	0.0854533	0	0	0.000694583	0.00721225	0.000252567	0.00010059	0.00300812	0.00300812	0.00010059	0.0856892	0.000694583	0.00749994	0.0894925	3.3613	0.112401	95.7502	0.776136	7.7325	0.888537	99.1115	96.5263	3.47371
EIO.MW17.51	10	A	0	0.000213073	0	0	0.0805131	0	0	0.00382058	0.007379	0	0.000352294	0.00277247	0.00277247	0.000352294	0.080756	0.00382058	0.007379	0.0877014	3.16126	0.401697	92.0807	4.35635	7.7608	4.75805	95.242	96.437	3.56296
EIO.MW17.51	10	B	0	0.000244657	0	0	0.0942351	0	0	0.00440721	0.00835852	0	0.000363961	0.00320327	0.00320327	0.000363961	0.094514	0.00440721	0.00835852	0.102488	3.12549	0.355124	92.2192	4.30021	7.5406	4.65533	95.3447	96.5194	3.48062
EIO.MW17.06	01	A	0	0	0	0	0.00707477	0	0	0.0014481	0.000832444	7.80528e-05	0.00181557	0.0057597	0.0057597	0.00181557	0.00707477	0.0014481	0.000921351	0.0160981	35.7787	11.2781	43.9478	8.99545	5.4135	20.2736	79.7264	52.9432	47.0568
EIO.MW17.06	01	B	0	0	0	0	0.00778026	0	0	0.00157977	0.00100758	0.000117101	0.00164062	0.00593638	0.00593638	0.00164062	0.00778026	0.00157977	0.00114097	0.016937	35.0497	9.68658	45.9364	9.32734	6.31135	19.0139	80.9861	55.2637	44.7363
EIO.MW17.06	02	A	0	0	7.27442e-05	0	0.000107509	0.000199633	0	8.44137e-05	6.75141e-05	8.63872e-05	0.00304928	0.00978982	0.00987274	0.00327958	0.000107509	8.44137e-05	0.000165914	0.0133442	73.985	24.5767	0.805658	0.632585	1.22807	25.2093	74.7907	1.43824	98.5618
EIO.MW17.06	02	B	0	0	6.92284e-05	0	6.22695e-05	0.00012625	0	4.72719e-05	4.32162e-05	7.62277e-05	0.0027603	0.00735969	0.0074386	0.00290594	6.22695e-05	4.72719e-05	0.000130044	0.0104541	71.155	27.7972	0.595647	0.452186	1.22867	28.2494	71.7506	1.04783	98.9522
EIO.MW17.06	03	A	0	7.51969e-05	9.31175e-05	0.000173267	0.010235	0.000187513	0	0.0017497	0.000187232	0.000152099	0.00431354	0.00944975	0.0095559	0.00452986	0.0103208	0.0017497	0.000360481	0.0261562	36.5339	17.3185	39.4582	6.68942	1.35945	24.0079	75.9921	46.1476	53.8524
EIO.MW17.06	03	B	0	0.000116421	9.35103e-05	0.000170868	0.013384	0.00015603	0	0.00263294	0.000280831	0.000106849	0.00517635	0.0115571	0.0116637	0.00535635	0.0135168	0.00263294	0.000402538	0.0331698	35.1637	16.1483	40.7503	7.93777	1.19902	24.0861	75.9139	48.688	51.312
EIO.MW17.06	04	A	0.000100509	0.000100501	7.25964e-05	0.000106796	0.0159288	0.000105022	0	0.00339614	0.00159811	0.000107154	0.00324486	0.0101937	0.0102765	0.00336602	0.0160433	0.00351209	0.00172017	0.0331979	30.9552	10.1393	48.3263	10.5792	4.92629	20.7185	79.2815	58.9056	41.0944
EIO.MW17.06	04	B	0.00014129	0.000148228	6.07499e-05	0.000107926	0.018529	0.000147381	0	0.00429853	0.00133065	0.000148646	0.00441972	0.0124836	0.0125528	0.00458974	0.018698	0.00446153	0.00149997	0.0403021	31.1469	11.3883	46.3946	11.0702	3.58827	22.4586	77.5414	57.4648	42.5352
EIO.MW17.06	05	A	0	9.15382e-05	0.000109026	0.000324365	0.0068066	0	0	0.0012517	0.00025506	0	0.00492565	0.00662884	0.00675312	0.00492565	0.00691095	0.0012517	0.00025506	0.0198414	34.0354	24.8251	34.8309	6.30855	1.26918	31.1336	68.8664	41.1395	58.8605
EIO.MW17.06	05	B	0	9.69118e-05	7.02289e-05	0.000314832	0.00703231	0	0	0.00143226	0.000335966	0	0.00549521	0.00766316	0.00774321	0.00549521	0.00714278	0.00143226	0.000335966	0.0218135	35.4974	25.1918	32.7448	6.56594	1.51682	31.7578	68.2422	39.3108	60.6892
EIO.MW17.06	06	A	0	0	0	0.000187397	0.0140181	0	0	0.00360993	0.00170383	0	0.0114589	0.0153978	0.0153978	0.0114589	0.0140181	0.00360993	0.00170383	0.0444847	34.6136	25.7592	31.5122	8.115	3.68886	33.8742	66.1258	39.6272	60.3728
EIO.MW17.06	06	B	0	0	0	0.000138538	0.0132338	0	0	0.00348095	0.00234806	0	0.0102436	0.0146109	0.0146109	0.0102436	0.0132338	0.00348095	0.00234806	0.0415693	35.1483	24.6422	31.8356	8.37386	5.34655	33.016	66.984	40.2095	59.7905
EIO.MW17.06	07	A	0	0	8.14642e-05	0.000277403	0.000138173	0.000140017	0	7.1952e-05	0.000184208	0	0.00439336	0.0122868	0.0123796	0.00455489	0.000138173	7.1952e-05	0.000184208	0.0171446	72.207	26.5674	0.805927	0.419676	1.06301	26.9871	73.0129	1.2256	98.7744
EIO.MW17.06	07	B	0	0	6.23704e-05	0.000323553	0.000103401	0.000159322	0	8.40254e-05	0.000109817	0	0.00286155	0.0041712	0.00424229	0.00304535	0.000103401	8.40254e-05	0.000109817	0.00747507	56.7526	40.7401	1.38328	1.12408	1.44784	41.8641	58.1359	2.50736	97.4926
EIO.MW17.06	08	A	0	0	0	0.000193621	0.00545734	0.000138351	0	0.000980295	7.70282e-05	8.71392e-05	0.00332237	0.00497729	0.00497729	0.00348198	0.00545734	0.000980295	0.000176285	0.0148969	33.4116	23.3738	36.634	6.58053	1.16953	29.9544	70.0456	43.2146	56.7854
EIO.MW17.06	08	B	0	0	0	0.000207223	0.00592357	0.000162471	0	0.00103649	9.91449e-05	7.22394e-05	0.00358715	0.00476818	0.00476818	0.00377458	0.00592357	0.00103649	0.00018143	0.0155028	30.7568	24.3477	38.2096	6.68581	1.15677	31.0335	68.9665	44.8955	55.1045
EIO.MW17.06	09	A	0.000100749	0.000109289	0.000102065	0.000225026	0.0175166	0.00013726	0	0.00397429	0.000975809	0.000159612	0.010292	0.0185425	0.0186588	0.0104504	0.0176412	0.00409051	0.00115762	0.0508409	36.7004	20.5551	34.6988	8.04571	2.22625	28.6008	71.3992	42.7446	57.2554
EIO.MW17.06	09	B	9.72199e-05	0.000110291	8.66679e-05	0.000226015	0.0154051	0.000111021	0	0.00367391	0.000674829	0.000164529	0.00984927	0.0168755	0.0169743	0.00997735	0.0155308	0.00378607	0.000862238	0.0462685	36.6865	21.564	33.5667	8.18281	1.82946	29.7468	70.2532	41.7495	58.2505
EIO.MW17.06	10	A	0	7.67357e-05	0	0.000271405	0.00453209	0.000210306	0	0.0011103	3.25633e-05	0	0.00461739	0.00520939	0.00520939	0.00486	0.00461957	0.0011103	3.25633e-05	0.0157993	32.9724	30.761	29.2392	7.02752	0.205683	37.7885	62.2115	36.2667	63.7333
EIO.MW17.06	10	B	0	8.20194e-05	0	0.000230126	0.00527384	0.000184527	0	0.00104645	4.75114e-05	0	0.00429217	0.00561763	0.00561763	0.00450504	0.00536734	0.00104645	4.75114e-05	0.0165365	33.9712	27.2431	32.4576	6.32811	0.28649	33.5712	66.4288	38.7857	61.2143
EIO.MW17.15	01	A	0	7.76635e-05	0	7.58977e-05	0.0109985	0	0	0.000271033	0.000188031	7.43358e-05	0	0.000585718	0.000585718	0	0.011087	0.000271033	0.000272704	0.0119438	4.90395	0	92.8268	2.26924	2.23226	2.26924	97.7308	95.096	4.90395
EIO.MW17.15	01	B	0	9.01615e-05	0	6.49431e-05	0.0098174	0	0	0.000259121	0.000252319	5.49796e-05	0	0.000305976	0.000305976	0	0.00992017	0.000259121	0.000314944	0.0104853	2.91815	0	94.6106	2.47129	2.91609	2.47129	97.5287	97.0819	2.91815
EIO.MW17.15	02	A	0	9.80963e-05	0	0	0.0302862	0	0	0.000299023	0.00146534	0.000162954	0	0.00127571	0.00127571	0	0.030398	0.000299023	0.00165095	0.0319727	3.99001	0	95.0747	0.935245	4.9101	0.935245	99.0648	96.01	3.99001
EIO.MW17.15	02	B	0	9.30025e-05	0	0	0.0341305	0	0	0.000319654	0.00143261	0.000152695	0	0.00122153	0.00122153	0	0.0342366	0.000319654	0.00160654	0.0357777	3.41421	0	95.6924	0.893443	4.29737	0.893443	99.1066	96.5858	3.41421
EIO.MW17.15	03	A	0	8.31892e-05	0	0	0.0352597	0	0	0.000447973	0.00139548	7.52015e-05	0	0.00147847	0.00147847	0	0.0353545	0.000447973	0.00148114	0.037281	3.96574	0	94.8326	1.20161	3.8211	1.20161	98.7984	96.0343	3.96574
EIO.MW17.15	03	B	0	6.58266e-05	0	0	0.0323896	0	0	0.000390111	0.00147972	6.70848e-05	0	0.00123944	0.00123944	0	0.0324647	0.000390111	0.00155613	0.0340942	3.63534	0	95.2204	1.14421	4.36499	1.14421	98.8558	96.3647	3.63534
EIO.MW17.15	04	A	0	8.81807e-05	0	0	0.0315533	0	0	0.00020775	0.00069439	0	0	0.00128745	0.00128745	0	0.0316538	0.00020775	0.00069439	0.033149	3.88383	0	95.4894	0.626717	2.05177	0.626717	99.3733	96.1162	3.88383
EIO.MW17.15	04	B	0	7.18688e-05	0	0	0.0224326	0	0	0.000165422	0.000226458	0	0	0.00100133	0.00100133	0	0.0225145	0.000165422	0.000226458	0.0236813	4.22837	0	95.0731	0.698535	0.947216	0.698535	99.3015	95.7716	4.22837
EIO.MW17.15	05	A	0	0	0	0	0.0174251	0	0	0.000319503	0.000462113	7.64191e-05	0	0.000809575	0.000809575	0	0.0174251	0.000319503	0.000549159	0.0185542	4.36331	0	93.9147	1.722	2.87468	1.722	98.278	95.6367	4.36331
EIO.MW17.15	05	B	0	0	0	0	0.018107	0	0	0.000349093	0.000546264	7.39303e-05	0	0.000823438	0.000823438	0	0.018107	0.000349093	0.000630475	0.0192795	4.27105	0	93.9183	1.81069	3.16662	1.81069	98.1893	95.729	4.27105
EIO.MW17.15	06	A	0	6.24569e-05	0	0	0.01061	0	0	0.000225772	0.000102318	0	0	0.000497271	0.000497271	0	0.0106812	0.000225772	0.000102318	0.0114043	4.36039	0	93.6599	1.97971	0.889211	1.97971	98.0203	95.6396	4.36039
EIO.MW17.15	06	B	0	6.79662e-05	0	0	0.00949585	0	0	0.000179955	0.000144426	0	0	0.000550081	0.000550081	0	0.00957332	0.000179955	0.000144426	0.0103034	5.33885	0	92.9146	1.74657	1.38236	1.74657	98.2534	94.6611	5.33885
EIO.MW17.15	07	A	0	0	0	0	0.0135106	0	0	0.000146931	0.000449292	0	0	0.000471775	0.000471775	0	0.0135106	0.000146931	0.000449292	0.0141293	3.33898	0	95.6211	1.03991	3.08186	1.03991	98.9601	96.661	3.33898
EIO.MW17.15	07	B	0	0	0	0	0.0121409	0	0	0.000113486	0.000294707	0	0	0.000449357	0.000449357	0	0.0121409	0.000113486	0.000294707	0.0127038	3.5372	0	95.5695	0.893329	2.26725	0.893329	99.1067	96.4628	3.5372
EIO.MW17.15	08	A	0	0	0	0	0.020988	0	0	0.000596923	0.000655328	5.2217e-05	0	0.000861323	0.000861323	0	0.020988	0.000596923	0.000714806	0.0224463	3.83727	0	93.5034	2.65934	3.08624	2.65934	97.3407	96.1627	3.83727
EIO.MW17.15	08	B	0	0	0	0	0.0199989	0	0	0.000618041	0.000515309	6.51155e-05	0	0.000879696	0.000879696	0	0.0199989	0.000618041	0.00058948	0.0214966	4.09225	0	93.0327	2.87506	2.669	2.87506	97.1249	95.9078	4.09225
EIO.MW17.15	09	A	0	7.85226e-05	0	0	0.0154032	0	0	0.000344844	8.16616e-05	0	0	0.000710349	0.000710349	0	0.0154927	0.000344844	8.16616e-05	0.0165479	4.29269	0	93.6234	2.08392	0.491064	2.08392	97.9161	95.7073	4.29269
EIO.MW17.15	09	B	0	0.000105043	0	0	0.0119036	0	0	0.00031478	3.32364e-05	0	0	0.000579397	0.000579397	0	0.0120233	0.00031478	3.32364e-05	0.0129175	4.48537	0	93.0778	2.43685	0.256638	2.43685	97.5631	95.5146	4.48537
EIO.MW17.15	10	A	0	1.20656e-05	0	0	0.000933168	0	0	2.28451e-05	6.65161e-06	0	0	4.90341e-05	4.90341e-05	0	0.000946921	2.28451e-05	6.65161e-06	0.0010188	4.81293	0	92.9447	2.24236	0.648652	2.24236	97.7576	95.1871	4.81293
EIO.MW17.15	10	B	0	0.000101667	0	0	0.0092576	0	0	0.000214847	5.56908e-05	0	0	0.000581408	0.000581408	0	0.00937349	0.000214847	5.56908e-05	0.0101697	5.71703	0	92.1704	2.11261	0.54463	2.11261	97.8874	94.283	5.71703
EIO.MW17.171X	01	A	0	0.000320749	0	0.000142283	0.102398	0	0	0.000612022	0.00621723	0	0.00027407	0.00409867	0.00409867	0.00027407	0.102764	0.000612022	0.00621723	0.107748	3.80393	0.254361	95.3737	0.56801	5.45535	0.822371	99.1776	95.9417	4.05829
EIO.MW17.171X	01	B	0	0.000305904	0	0.000142389	0.0904223	0	0	0.000540746	0.00417215	0	0.000294683	0.0039214	0.0039214	0.000294683	0.090771	0.000540746	0.00417215	0.0955279	4.10498	0.308479	95.0205	0.566061	4.18471	0.87454	99.1255	95.5865	4.41346
EIO.MW17.171X	02	A	0	0.000349139	0	0.000233292	0.0874482	0	0	0.000558145	0.00366443	0.000248234	0.00031588	0.00356449	0.00356449	0.00031588	0.0878462	0.000558145	0.00394718	0.0922847	3.86249	0.342288	95.1904	0.604808	4.10174	0.947096	99.0529	95.7952	4.20478
EIO.MW17.171X	02	B	0	0.000296662	0	0.00024336	0.071789	0	0	0.000467992	0.00247111	0.000208911	0.000107221	0.00322182	0.00322182	0.000107221	0.0721271	0.000467992	0.00270907	0.0759242	4.24347	0.141221	94.9989	0.616394	3.4452	0.757615	99.2424	95.6153	4.38469
EIO.MW17.171X	03	A	0	0.000404346	8.24904e-05	0.000110688	0.137757	0	0	0.00102956	0.0105676	0.000275813	0.0002072	0.00534471	0.00543874	0.0002072	0.138218	0.00102956	0.0108818	0.144894	3.75361	0.143001	95.3928	0.710564	6.98554	0.853565	99.1464	96.1034	3.89661
EIO.MW17.171X	03	B	0	0.000460975	6.14641e-05	0.000148093	0.145648	0	0	0.00101966	0.0103504	0.000291268	0.000238135	0.00584146	0.00591153	0.000238135	0.146173	0.00101966	0.0106822	0.153343	3.85511	0.155296	95.3246	0.664956	6.51255	0.820252	99.1797	95.9896	4.0104
EIO.MW17.171X	04	A	0	0.00035903	0	0.000204254	0.0944355	0	0	0.000648844	0.00303914	0.000203788	0.000211322	0.00344394	0.00344394	0.000211322	0.0948447	0.000648844	0.00327127	0.0991488	3.47351	0.213136	95.6589	0.654414	3.19397	0.86755	99.1325	96.3134	3.68664
EIO.MW17.171X	04	B	0	0.000341319	0	0.000290691	0.0805965	0	0	0.000526536	0.00323347	0.000189761	0.00020512	0.0037115	0.0037115	0.00020512	0.0809856	0.000526536	0.00344962	0.0854288	4.34455	0.240107	94.799	0.616346	3.88128	0.856453	99.1435	95.4153	4.58466
EIO.MW17.171X	05	A	0	0.000502168	0	0.000149517	0.196838	0	0	0.0016175	0.022081	0.000399803	0.000317275	0.00726485	0.00726485	0.000317275	0.197411	0.0016175	0.0225364	0.20661	3.5162	0.153562	95.5474	0.782873	9.8349	0.936435	99.0636	96.3302	3.66977
EIO.MW17.171X	05	B	0	0.000614698	0	0.000241126	0.219019	0	0	0.00163824	0.0290801	0.000391358	0.000650087	0.00881179	0.00881179	0.000650087	0.219719	0.00163824	0.0295258	0.23082	3.81761	0.281643	95.191	0.709748	11.341	0.991391	99.0086	95.9007	4.09925
EIO.MW17.171X	06	A	0	0.000292716	0	0.000182941	0.0651897	0	0	0.000529637	0.0035965	0.000173134	9.3131e-05	0.00275459	0.00275459	9.3131e-05	0.0655233	0.000529637	0.00379371	0.0689007	3.99791	0.135167	95.0982	0.768697	5.21871	0.903864	99.0961	95.8669	4.13307
EIO.MW17.171X	06	B	0	0.000343669	0	0.000249356	0.0690758	0	0	0.000544309	0.00358941	0.000218102	0.000170048	0.00290972	0.00290972	0.000170048	0.0694676	0.000544309	0.00383784	0.0730916	3.98092	0.23265	95.0417	0.744694	4.98878	0.977344	99.0227	95.7864	4.21357
EIO.MW17.171X	07	A	0	0.000537673	7.98256e-05	0.000336068	0.0827287	0	0	0.000556101	0.000667307	0.000113633	0.000420486	0.0039151	0.0040061	0.000420486	0.0833416	0.000556101	0.000796741	0.0883243	4.53566	0.47607	94.3587	0.629613	0.893999	1.10568	98.8943	94.9883	5.01173
EIO.MW17.171X	07	B	0	0.000502727	9.54698e-05	0.000348469	0.088221	0	0	0.000578167	0.000776252	9.55677e-05	0.000419182	0.00431578	0.00442461	0.000419182	0.0887941	0.000578167	0.00088511	0.0942161	4.69623	0.444916	94.2452	0.613661	0.930703	1.05858	98.9414	94.8589	5.14115
EIO.MW17.171X	08	A	0	0.000654988	0	0.000201366	0.142508	0	0	0.000985824	0.00284437	0.000289249	0.000193029	0.00533687	0.00533687	0.000193029	0.143254	0.000985824	0.00317384	0.14977	3.56338	0.128883	95.6495	0.658224	2.07517	0.787107	99.2129	96.3077	3.69226
EIO.MW17.171X	08	B	0	0.000596855	0	0.000146781	0.145935	0	0	0.00102035	0.00374057	0.000341884	0.000273758	0.00571366	0.00571366	0.000273758	0.146615	0.00102035	0.00412999	0.153623	3.71927	0.178201	95.4383	0.66419	2.61801	0.842392	99.1576	96.1025	3.89747
EIO.MW17.171X	09	A	0	0.00050173	0	0.000385769	0.0999306	0	0	0.000697702	0.00333044	0.00014642	0.000532766	0.00517104	0.00517104	0.000532766	0.100503	0.000697702	0.00349722	0.106904	4.83709	0.498359	94.0119	0.652644	3.16774	1.151	98.849	94.6646	5.33545
EIO.MW17.171X	09	B	0	0.000493636	0	0.000325762	0.127339	0	0	0.000843628	0.00857633	0.000236879	0.000546629	0.00574122	0.00574122	0.000546629	0.127901	0.000843628	0.00884615	0.135033	4.25172	0.404812	94.7187	0.624758	6.14833	1.02957	98.9704	95.3435	4.65654
EIO.MW17.171X	10	A	0	0.000504949	0	0.000360269	0.0967006	0	0	0.000641202	0.00841965	0.000223033	0.000631384	0.00510174	0.00510174	0.000631384	0.0972762	0.000641202	0.0086737	0.10365	4.92206	0.609147	93.8502	0.61862	7.72202	1.22777	98.7722	94.4688	5.53121
EIO.MW17.171X	10	B	0	0.000568183	0	0.000274044	0.0890179	0	0	0.000610221	0.0054125	0.000230949	0.000486557	0.00477021	0.00477021	0.000486557	0.0896656	0.000610221	0.00567557	0.0955326	4.99328	0.50931	93.8587	0.638757	5.60782	1.14807	98.8519	94.4974	5.50259
EIO.MW17.171X_2	02	A	0	0.000282441	0	0.000698949	0.0685908	0	0	0.00053084	0.00280934	0.000298376	0.00020389	0.00381156	0.00381156	0.00020389	0.0689127	0.00053084	0.00314921	0.073459	5.18868	0.277556	93.8111	0.722634	4.11079	1.00019	98.9998	94.5338	5.46624
EIO.MW17.171X_2	02	B	0	0.000350243	0	0.000613136	0.0714065	0	0	0.000539804	0.00215952	0.000298739	0.000203194	0.00405223	0.00405223	0.000203194	0.0718058	0.000539804	0.0024998	0.076601	5.29005	0.265263	93.74	0.704696	3.16027	0.969959	99.03	94.4447	5.55531
EIO.MW17.171X_2	03	A	0	0.000235003	0	0.000406731	0.0424615	0	0	0.000447681	0.00265186	0.000288262	8.25095e-05	0.00206142	0.00206142	8.25095e-05	0.0427294	0.000447681	0.00298021	0.045321	4.54848	0.182056	94.2817	0.9878	6.17005	1.16986	98.8301	95.2695	4.73053
EIO.MW17.171X_2	03	B	0	0.000251164	0	0.000387097	0.0543138	0	0	0.000539267	0.00358061	0.000254933	9.82634e-05	0.00260127	0.00260127	9.82634e-05	0.0546001	0.000539267	0.00387099	0.0578389	4.49745	0.169892	94.4003	0.93236	6.27289	1.10225	98.8977	95.3327	4.66734
EIO.MW17.171X_2	04	A	0	0.000233561	0	0.000796513	0.0354866	0	0	0.00031778	0.00171917	0	0	0.00164135	0.00164135	0	0.0357529	0.00031778	0.00171917	0.037712	4.35234	0	94.805	0.842649	4.35993	0.842649	99.1574	95.6477	4.35234
EIO.MW17.171X_2	04	B	0	0.000279232	0	0.00071392	0.0440403	0	0	0.000386397	0.00246248	0	0	0.00198436	0.00198436	0	0.0443586	0.000386397	0.00246248	0.0467294	4.2465	0	94.9266	0.826883	5.00587	0.826883	99.1731	95.7535	4.2465
EIO.MW17.171X_2	05	A	0	0.000234192	0	0.000446435	0.0436422	0	0	0.000433034	0.00342948	0.000197762	0	0.0020176	0.0020176	0	0.0439091	0.000433034	0.00365474	0.0463598	4.35204	0	94.7139	0.934073	7.30736	0.934073	99.0659	95.648	4.35204
EIO.MW17.171X_2	05	B	0	0.000269075	0	0.000433408	0.0502112	0	0	0.000489309	0.00443608	0.000303375	0	0.00222196	0.00222196	0	0.0505179	0.000489309	0.00478164	0.0532292	4.17433	0	94.9064	0.91925	8.24267	0.91925	99.0807	95.8257	4.17433
EIO.MW17.171X_2	06	A	0	0.000331131	0	0.000482402	0.0582592	0	0	0.000477564	0.00406277	0.000306274	0.000241514	0.00328045	0.00328045	0.000241514	0.0586366	0.000477564	0.00441164	0.0626362	5.23731	0.385583	93.6147	0.762441	6.57984	1.14802	98.852	94.3771	5.6229
EIO.MW17.171X_2	06	B	0	0.000338898	0	0.000475692	0.0639934	0	0	0.000531926	0.00393794	0.000354946	0.00025006	0.00350853	0.00350853	0.00025006	0.0643797	0.000531926	0.00434225	0.0686702	5.10925	0.364147	93.752	0.774609	5.94727	1.13876	98.8612	94.5266	5.47339
EIO.MW17.171X_2	07	A	0	0.000236657	0	0.000607922	0.0278976	0	0	0.000256482	0.00184102	0.000267908	0	0.00107229	0.00107229	0	0.0281674	0.000256482	0.00214619	0.0294962	3.63537	0	95.4951	0.869545	6.78264	0.869545	99.1305	96.3646	3.63537
EIO.MW17.171X_2	07	B	0	0.00021735	0	0.0006034	0.0262593	0	0	0.000279084	0.00161431	0.000218149	0	0.0013069	0.0013069	0	0.0265071	0.000279084	0.0018628	0.0280931	4.65203	0	94.3545	0.993426	6.21848	0.993426	99.0066	95.348	4.65203
EIO.MW17.171X_2	08	A	0	0.000218316	0	0.00036224	0.0527624	0	0	0.000489041	0.00393323	0.000311911	0	0.00191059	0.00191059	0	0.0530113	0.000489041	0.00428852	0.0554109	3.44805	0	95.6694	0.882571	7.18352	0.882571	99.1174	96.552	3.44805
EIO.MW17.171X_2	08	B	0	0.000203725	0	0.000310464	0.0475181	0	0	0.000395052	0.00276434	0.000191592	0	0.00223802	0.00223802	0	0.0477504	0.000395052	0.00298257	0.0503834	4.44198	0	94.7739	0.784091	5.5889	0.784091	99.2159	95.558	4.44198
EIO.MW17.171X_2	09	A	0	0.000252676	0	0.000285903	0.0807567	0	0	0.000678207	0.00321353	0.00030976	0.000254123	0.00385746	0.00385746	0.000254123	0.0810448	0.000678207	0.00356637	0.0858346	4.49407	0.296061	94.4197	0.790133	3.98919	1.08619	98.9138	95.2099	4.79013
EIO.MW17.171X_2	09	B	0	0.000274069	0	0.000248819	0.0886167	0	0	0.000744907	0.00393883	0.00024412	0.000285998	0.00428147	0.00428147	0.000285998	0.0889291	0.000744907	0.0042169	0.0942415	4.54309	0.303474	94.363	0.790423	4.28292	1.0939	98.9061	95.1534	4.84656
EIO.MW17.171X_2	10	A	0	0.000188746	0	0.000429383	0.0226163	0	0	0.000195425	0.000817921	0.000205696	8.55625e-05	0.00136199	0.00136199	8.55625e-05	0.0228315	0.000195425	0.00105222	0.0244745	5.56495	0.349599	93.287	0.798485	4.12204	1.14808	98.8519	94.0854	5.91455
EIO.MW17.171X_2	10	B	0	0.000142754	0	0.000374357	0.0189118	0	0	0.00017044	0.000603522	0.000152147	7.59631e-05	0.00128452	0.00128452	7.59631e-05	0.0190745	0.00017044	0.000776826	0.0206054	6.23391	0.368656	92.5703	0.827161	3.63304	1.19582	98.8042	93.3974	6.60256
EIO.MW17.171X_2	11	A	0	0.000314115	0	0.000504029	0.0520737	0	0	0.000443185	0.00217856	0.000238739	0.000227022	0.0026909	0.0026909	0.000227022	0.0524317	0.000443185	0.00245049	0.0557928	4.82301	0.406901	93.9757	0.794341	4.20734	1.20124	98.7988	94.7701	5.22991
EIO.MW17.171X_2	11	B	0	0.000293258	0	0.000432911	0.0710698	0	0	0.000582153	0.00381963	0.000323687	0.000184172	0.00364193	0.00364193	0.000184172	0.0714041	0.000582153	0.00418833	0.0758123	4.80387	0.242932	94.1853	0.767887	5.23537	1.01082	98.9892	94.9532	5.04681
EIO.MW17.171X_2	12	A	0	0.000247039	0	0.000440834	0.0331314	0	0	0.000320729	0.00107338	0.000155748	0	0.0012088	0.0012088	0	0.033413	0.000320729	0.00125078	0.0349425	3.45941	0	95.6227	0.917876	3.45584	0.917876	99.0821	96.5406	3.45941
EIO.MW17.171X_2	12	B	0	0.000230972	0	0.000362672	0.0332264	0	0	0.000317906	0.000887683	0.000148153	0	0.00124619	0.00124619	0	0.0334897	0.000317906	0.00105644	0.0350537	3.55508	0	95.538	0.906909	2.9256	0.906909	99.0931	96.4449	3.55508
EIO.MW17.171X_2	14	A	0	0.00022825	0	0.00012155	0.117971	0	0	0.000917678	0.0064288	0.000362371	0.000249511	0.00492399	0.00492399	0.000249511	0.118232	0.000917678	0.00684156	0.124323	3.96065	0.200696	95.1005	0.738142	5.21603	0.938838	99.0612	95.8386	4.16135
EIO.MW17.171X_2	14	B	0	0.000223839	0	0.000120299	0.110929	0	0	0.000852111	0.0064568	0.00026832	0.000211671	0.00427513	0.00427513	0.000211671	0.111184	0.000852111	0.00676243	0.116523	3.66891	0.181655	95.4182	0.731279	5.48517	0.912934	99.0871	96.1494	3.85056
EIO.MW17.171X_2	15	A	0	0.000190623	0	0.000101778	0.0913036	0	0	0.000625156	0.00364102	0.000288964	0.000131311	0.00378686	0.00378686	0.000131311	0.0915209	0.000625156	0.00397017	0.0960642	3.94201	0.136691	95.2705	0.650768	3.9688	0.787459	99.2125	95.9213	4.0787
EIO.MW17.171X_2	15	B	0	0.000204282	0	8.47504e-05	0.0924558	0	0	0.000668314	0.00412765	0.000277429	0.000230756	0.00374473	0.00374473	0.000230756	0.0926887	0.000668314	0.00444366	0.0973325	3.84735	0.23708	95.2289	0.68663	4.36611	0.92371	99.0763	95.9156	4.08443
EIO.MW17.37	01	A	0	0	0.000180143	9.02245e-05	0.000256693	0	0	4.59603e-05	0.0105012	0.000235412	0.00370581	0.100458	0.100663	0.00370581	0.000256693	4.59603e-05	0.0107693	0.104672	96.1704	3.54041	0.245236	0.0439091	9.32888	3.58432	96.4157	0.289145	99.7109
EIO.MW17.37	01	B	0	0	0.000158281	9.32596e-05	0.000225021	0	0	5.16542e-05	0.0092948	0.000210393	0.00341979	0.0886077	0.0887881	0.00341979	0.000225021	5.16542e-05	0.00953445	0.0924845	96.0032	3.69769	0.243307	0.0558518	9.34576	3.75354	96.2465	0.299159	99.7008
EIO.MW17.37	02	A	0	0	0.000183254	0.000121411	0.000338769	0	0	5.76745e-05	0.0235054	0.000962854	0.00551808	0.124943	0.125152	0.00551808	0.000338769	5.76745e-05	0.0246022	0.131066	95.4874	4.21015	0.258472	0.0440041	15.8042	4.25415	95.7458	0.302476	99.6975
EIO.MW17.37	02	B	0	0	0.000147158	0.000101704	0.000310944	0	0	5.55923e-05	0.0198196	0.000866291	0.00499305	0.120242	0.12041	0.00499305	0.000310944	5.55923e-05	0.0208063	0.125769	95.7386	3.97001	0.247233	0.0442017	14.1949	4.01421	95.9858	0.291435	99.7086
EIO.MW17.37	03	A	0	0	7.87335e-05	0	0.000172952	0.000103592	0	8.35987e-05	0.000778581	0.000175915	0.00843122	0.0498377	0.0499274	0.00855072	0.000172952	8.35987e-05	0.000978959	0.0587347	85.005	14.5582	0.294462	0.142333	1.63942	14.7005	85.2995	0.436795	99.5632
EIO.MW17.37	03	B	0	0	0.000137279	0	0.000182385	9.23416e-05	0	6.79337e-05	0.00129125	0.000197443	0.0102269	0.0592686	0.0594251	0.0103335	0.000182385	6.79337e-05	0.00151615	0.0700089	84.8822	14.7602	0.260517	0.0970359	2.11975	14.8572	85.1428	0.357553	99.6424
EIO.MW17.37	04	A	0	0	0.000123607	0	0.00033637	0	0	5.97643e-05	0.0074137	8.85745e-05	0.00289803	0.117911	0.118052	0.00289803	0.00033637	5.97643e-05	0.0075146	0.121346	97.2853	2.38823	0.277198	0.0492509	5.83155	2.43748	97.5625	0.326449	99.6736
EIO.MW17.37	04	B	0	0	0.000164052	0	0.0002446	0	0	6.02753e-05	0.00636539	7.70278e-05	0.00239461	0.102918	0.103105	0.00239461	0.0002446	6.02753e-05	0.00645313	0.105804	97.4486	2.26324	0.231181	0.0569686	5.7485	2.32021	97.6798	0.28815	99.7119
EIO.MW17.37	05	A	0	0	0.000140555	0	0.000223454	0	0	0	0.0109932	6.96504e-05	0.00113777	0.0878315	0.0879917	0.00113777	0.000223454	0	0.0110726	0.0893529	98.4766	1.27334	0.250081	0	11.0257	1.27334	98.7267	0.250081	99.7499
EIO.MW17.37	05	B	0	0	0.000136139	0	0.000261347	0	0	0	0.0133486	0.00011912	0.0012712	0.0938819	0.0940371	0.0012712	0.000261347	0	0.0134842	0.0955696	98.3964	1.33013	0.273462	0	12.3648	1.33013	98.6699	0.273462	99.7265
EIO.MW17.37	06	A	0	0	0.000224676	0	0.000391773	0	0	5.67208e-05	0.0232532	0.000309027	0.00545712	0.167266	0.167522	0.00545712	0.000391773	5.67208e-05	0.0236052	0.173428	96.5948	3.14662	0.2259	0.0327057	11.9803	3.17933	96.8207	0.258605	99.7414
EIO.MW17.37	06	B	0	0	0.000286957	0	0.000375337	0	0	4.67396e-05	0.0168831	0.000283988	0.00478232	0.149022	0.149349	0.00478232	0.000375337	4.67396e-05	0.0172065	0.154554	96.6326	3.09427	0.242852	0.0302417	10.0178	3.12451	96.8755	0.273093	99.7269
EIO.MW17.37	07	A	0	0	0.000154392	0	0.000279992	0	0	0	0.00720898	6.39058e-05	0.00342712	0.0982729	0.0984489	0.00342712	0.000279992	0	0.00728178	0.102156	96.3711	3.35479	0.274083	0	6.6538	3.35479	96.6452	0.274083	99.7259
EIO.MW17.37	07	B	0	0	0.000169659	0	0.000279565	0	0	0	0.00739146	7.84397e-05	0.00360429	0.0944805	0.0946739	0.00360429	0.000279565	0	0.0074808	0.0985577	96.0593	3.65704	0.283656	0	7.0548	3.65704	96.343	0.283656	99.7163
EIO.MW17.37	08	A	0	0	0.000104805	0	0.000166951	0	0	0	0.00114036	0.000136535	0.00156192	0.0441778	0.0442972	0.00156192	0.000166951	0	0.00129588	0.0460261	96.2437	3.39356	0.362731	0	2.73843	3.39356	96.6064	0.362731	99.6373
EIO.MW17.37	08	B	0	0	0.000147493	0	0.00024749	0	0	0	0.00905349	0.000216037	0.0025627	0.0870783	0.0872465	0.0025627	0.00024749	0	0.00929957	0.0900567	96.8795	2.84565	0.274816	0	9.35983	2.84565	97.1543	0.274816	99.7252
EIO.MW17.37	09	A	0	0	0.000173746	0	0.000262763	0	0	0	0.00837527	0.000187601	0.0020381	0.100517	0.100715	0.0020381	0.000262763	0	0.00858896	0.103016	97.7665	1.97843	0.25507	0	7.69583	1.97843	98.0216	0.25507	99.7449
EIO.MW17.37	09	B	0	0	0.000152987	0	0.00023922	0	0	0	0.00716775	0.00012922	0.00172892	0.0928474	0.0930218	0.00172892	0.00023922	0	0.00731494	0.0949899	97.9281	1.82011	0.251837	0	7.15014	1.82011	98.1799	0.251837	99.7482
EIO.MW17.37	10	A	0	0	0.000261297	0	0.000407913	0	0	0	0.0217031	0.000442991	0.00212162	0.153076	0.153374	0.00212162	0.000407913	0	0.0222077	0.155903	98.3775	1.36086	0.261645	0	12.4685	1.36086	98.6391	0.261645	99.7384
EIO.MW17.37	10	B	0	0	0.000257909	0	0.00037558	0	0	0	0.0139235	0.000412291	0.00187168	0.150529	0.150823	0.00187168	0.00037558	0	0.0143931	0.153071	98.5319	1.22276	0.245364	0	8.59477	1.22276	98.7772	0.245364	99.7546
EIO.MW15.T	01	A	0	0.00018069	0	0	0.0371266	0	0	0.000399439	0.00155646	0.000275706	0	0.00138069	0.00138069	0	0.0373326	0.000399439	0.00187051	0.0391127	3.53003	0	95.4487	1.02125	4.56408	1.02125	98.9787	96.47	3.53003
EIO.MW15.T	01	B	0	0.000139864	0	0	0.0302417	0	0	0.0003097	0.0013908	0.000269605	0	0.001367	0.001367	0	0.0304012	0.0003097	0.0016979	0.0320779	4.2615	0	94.773	0.965463	5.02696	0.965463	99.0345	95.7385	4.2615
EIO.MW15.T	02	A	0	0.000240111	0	0.000195936	0.0430429	0	0	0.000358348	0.000388637	0.000307444	0	0.00189304	0.00189304	0	0.0433166	0.000358348	0.000738834	0.045568	4.15433	0	95.0593	0.786404	1.59552	0.786404	99.2136	95.8457	4.15433
EIO.MW15.T	02	B	0	0.000298488	0	0.000226307	0.0491429	0	0	0.000433241	0.000489879	0.000337479	0	0.00190094	0.00190094	0	0.0494832	0.000433241	0.000874289	0.0518174	3.66855	0	95.4954	0.836093	1.65925	0.836093	99.1639	96.3315	3.66855
EIO.MW15.T	03	A	0	0.000225869	0	0.000125894	0.0337038	0	0	0.000313373	0.00108718	0.000187272	0	0.00153526	0.00153526	0	0.0339613	0.000313373	0.00130049	0.0358099	4.28724	0	94.8377	0.8751	3.50438	0.8751	99.1249	95.7128	4.28724
EIO.MW15.T	03	B	0	0.000210461	0	0.000100918	0.0386503	0	0	0.000337069	0.00117517	0.000214768	0	0.0016486	0.0016486	0	0.0388902	0.000337069	0.00141981	0.0408758	4.03318	0	95.1422	0.824617	3.35686	0.824617	99.1754	95.9668	4.03318
EIO.MW15.T	04	A	0	0.000160863	0	6.39015e-05	0.0188534	0	0	0.000152225	4.80132e-05	0	0	0.00101692	0.00101692	0	0.0190368	0.000152225	4.80132e-05	0.020206	5.03276	0	94.2139	0.753367	0.237056	0.753367	99.2466	94.9672	5.03276
EIO.MW15.T	04	B	0	0.000150862	0	8.01323e-05	0.0159176	0	0	0.00013204	5.58444e-05	0	0	0.000835404	0.000835404	0	0.0160895	0.00013204	5.58444e-05	0.017057	4.89772	0	94.3282	0.774111	0.326331	0.774111	99.2259	95.1023	4.89772
EIO.MW15.T	05	A	0	0.000214457	0	0	0.051122	0	0	0.000441594	0.000503812	0.000195758	0	0.00208348	0.00208348	0	0.0513664	0.000441594	0.000726792	0.0538915	3.86606	0	95.3145	0.819414	1.33068	0.819414	99.1806	96.1339	3.86606
EIO.MW15.T	05	B	0	0.00022332	0	0	0.0445681	0	0	0.00040232	0.000371259	0.000143764	0	0.00179627	0.00179627	0	0.0448226	0.00040232	0.000535015	0.0470212	3.82013	0	95.3243	0.855613	1.12501	0.855613	99.1444	96.1799	3.82013
EIO.MW15.T	06	A	0	0.000190751	0	0.000139385	0.033427	0	0	0.000346782	0.00074812	0.000238753	0	0.00151178	0.00151178	0	0.0336444	0.000346782	0.00102007	0.035503	4.25819	0	94.765	0.97677	2.79296	0.97677	99.0232	95.7418	4.25819
EIO.MW15.T	06	B	0	0.000188061	0	0.000180645	0.0355055	0	0	0.000357458	0.00102783	0.000145901	0	0.00157915	0.00157915	0	0.0357199	0.000357458	0.00119402	0.0376565	4.19358	0	94.8572	0.949261	3.07338	0.949261	99.0507	95.8064	4.19358
EIO.MW15.T	07	A	0	0.000164209	0	0	0.0306403	0	0	0.000254186	0.000142232	9.75265e-05	0	0.00144193	0.00144193	0	0.0308275	0.000254186	0.00025332	0.0325236	4.43348	0	94.785	0.781542	0.772861	0.781542	99.2185	95.5665	4.43348
EIO.MW15.T	07	B	0	0.000183279	0	0	0.0273067	0	0	0.000200927	0.000147948	0.000121177	0	0.00114093	0.00114093	0	0.0275157	0.000200927	0.000285976	0.0288575	3.95367	0	95.3501	0.696274	0.981269	0.696274	99.3037	96.0463	3.95367
EIO.MW15.T	08	A	0	0.00011323	0.000106554	0	0.0297413	0	0	0.000215108	0.000340407	0.000173822	0.000279886	0.0184015	0.018523	0.000279886	0.0298704	0.000215108	0.000538401	0.0488883	37.8883	0.572501	61.0992	0.439999	1.08929	1.0125	98.9875	61.5392	38.4608
EIO.MW15.T	08	B	0	0.000144339	0.000147951	0	0.0301752	0	0	0.000210777	0.000323132	0.000154019	0.000297415	0.0196977	0.0198663	0.000297415	0.0303397	0.000210777	0.000498569	0.0507142	39.1731	0.586453	59.8249	0.415617	0.973524	1.00207	98.9979	60.2405	39.7595
EIO.MW15.T	09	A	0	0.000112968	0	0	0.0506238	0	0	0.000440146	0.00130902	0.000218935	0	0.00227835	0.00227835	0	0.0507526	0.000440146	0.0015584	0.0534711	4.26091	0	94.9159	0.823149	2.83194	0.823149	99.1769	95.7391	4.26091
EIO.MW15.T	09	B	0	8.60741e-05	0	0	0.0540873	0	0	0.000465961	0.00145245	0.000245582	0	0.00213563	0.00213563	0	0.0541854	0.000465961	0.00173218	0.056787	3.76078	0	95.4187	0.820542	2.96002	0.820542	99.1795	96.2392	3.76078
EIO.MW15.T	10	A	0	0.000121499	0	0	0.0270448	0	0	0.000208353	0.000184554	0.000189895	8.39991e-05	0.00121055	0.00121055	8.39991e-05	0.0271833	0.000208353	0.000400856	0.0286862	4.21996	0.292821	94.7609	0.726317	1.37812	1.01914	98.9809	95.4872	4.51278
EIO.MW15.T	10	B	0	9.39987e-05	0	0	0.0309028	0	0	0.00019812	0.000210397	0.000158262	0.000109525	0.00145014	0.00145014	0.000109525	0.03101	0.00019812	0.000390667	0.0327677	4.42552	0.334247	94.6356	0.60462	1.17818	0.938867	99.0611	95.2402	4.75977
EIO.MW15.T	11	A	0	8.70807e-05	0	0	0.0446003	0	0	0.000253672	0.000168442	0.000157827	0	0.00204185	0.00204185	0	0.0446996	0.000253672	0.000348216	0.0469951	4.34482	0	95.1154	0.539785	0.735513	0.539785	99.4602	95.6552	4.34482
EIO.MW15.T	11	B	0	0.000113448	0	0	0.046166	0	0	0.000264738	0.000155806	8.55717e-05	0	0.00175124	0.00175124	0	0.0462953	0.000264738	0.000253278	0.0483113	3.62491	0	95.8271	0.547983	0.521527	0.547983	99.452	96.3751	3.62491
EIO.MW15.T	12	A	0	9.23424e-05	0	0	0.0483618	0	0	0.000466935	0.00127473	0.000175693	0	0.00202572	0.00202572	0	0.0484671	0.000466935	0.00147485	0.0509597	3.97514	0	95.1086	0.916282	2.81274	0.916282	99.0837	96.0249	3.97514
EIO.MW15.T	12	B	0	8.29839e-05	0	0	0.0472303	0	0	0.000456147	0.00203475	0.000205195	0	0.00204849	0.00204849	0	0.0473249	0.000456147	0.00226848	0.0498295	4.11099	0	94.9736	0.915416	4.35425	0.915416	99.0846	95.889	4.11099
EIO.MW15.T	13	A	0	8.47679e-05	0	0	0.0277565	0	0	0.00023454	5.07877e-05	0.000144913	0	0.00121378	0.00121378	0	0.0278531	0.00023454	0.000215852	0.0293014	4.14238	0	95.0572	0.80044	0.731274	0.80044	99.1996	95.8576	4.14238
EIO.MW15.T	13	B	0	8.8242e-05	0	0	0.0268113	0	0	0.000236438	4.58343e-05	0.000147095	0	0.00114377	0.00114377	0	0.0269119	0.000236438	0.000213385	0.0282921	4.04271	0	95.1216	0.835702	0.748574	0.835702	99.1643	95.9573	4.04271
EIO.MW15.T	14	A	0	7.42206e-05	0	0	0.0471658	0	0	0.000256136	0.000390725	0.000173822	0	0.00203782	0.00203782	0	0.0472504	0.000256136	0.00058872	0.0495443	4.11312	0	95.3699	0.516983	1.17431	0.516983	99.483	95.8869	4.11312
EIO.MW15.T	14	B	0	7.2471e-05	0	0	0.0445365	0	0	0.000221233	0.00027714	0.00015223	0	0.0019189	0.0019189	0	0.0446191	0.000221233	0.000450539	0.0467592	4.10378	0	95.4231	0.473132	0.954335	0.473132	99.5269	95.8962	4.10378
EIO.MW15.T	15	A	0	0.000106425	0	0	0.029734	0	0	0.000244029	0.000107398	8.42689e-05	0	0.00140695	0.00140695	0	0.0298553	0.000244029	0.000203385	0.0315063	4.46563	0	94.7598	0.774543	0.641399	0.774543	99.2255	95.5344	4.46563
EIO.MW15.T	15	B	0	8.40254e-05	0	0	0.0283279	0	0	0.000228882	0.0001035	8.43771e-05	0	0.00110606	0.00110606	0	0.0284236	0.000228882	0.00019961	0.0297586	3.71678	0	95.5141	0.769128	0.666296	0.769128	99.2309	96.2832	3.71678
EIO.MW15.T	16	A	0	0	0	0	0.0277236	0	0	0.000225739	7.89509e-05	0.000234184	0	0.00129546	0.00129546	0	0.0277236	0.000225739	0.000345701	0.0292448	4.42972	0	94.7984	0.771896	1.16829	0.771896	99.2281	95.5703	4.42972
EIO.MW15.T	16	B	0	0	0	0	0.0239376	0	0	0.000198903	0.000154155	0.000227705	0	0.00115377	0.00115377	0	0.0239376	0.000198903	0.000413524	0.0252902	4.56211	0	94.6514	0.78648	1.60881	0.78648	99.2135	95.4379	4.56211
EIO.MW15.T	17	A	0	0.000102687	0	0	0.0505885	0	0	0.000342987	0.000712568	0.00021398	0	0.00211221	0.00211221	0	0.0507056	0.000342987	0.000956305	0.0531607	3.97325	0	95.3816	0.645189	1.7671	0.645189	99.3548	96.0267	3.97325
EIO.MW15.T	17	B	0	9.31066e-05	0	0	0.0516126	0	0	0.000335997	0.000698271	0.000197787	0	0.00231814	0.00231814	0	0.0517187	0.000335997	0.000923562	0.0543728	4.26341	0	95.1186	0.61795	1.6702	0.61795	99.382	95.7366	4.26341
EIO.MW15.T	18	A	0	9.42212e-05	0	0	0.0317442	0	0	0.000238793	0.000182747	0.000304337	0	0.00146735	0.00146735	0	0.0318517	0.000238793	0.000529406	0.0335578	4.3726	0	94.9158	0.711587	1.55309	0.711587	99.2884	95.6274	4.3726
EIO.MW15.T	18	B	0	8.8186e-05	0	0	0.0384306	0	0	0.000294255	0.000200521	0.0003543	0	0.00179202	0.00179202	0	0.0385311	0.000294255	0.000604091	0.0406174	4.41197	0	94.8636	0.724456	1.46548	0.724456	99.2755	95.588	4.41197
EIO.MW15.P	01	A	0	0	0	2.46332e-05	6.37339e-06	2.62936e-05	0	0	0	0	0.00123841	0.000266929	0.000266929	0.00126874	6.37339e-06	0	0	0.00154205	17.3101	82.2766	0.413307	0	0	82.2766	17.7234	0.413307	99.5867
EIO.MW15.P	01	B	0	0	0	0.000238167	6.72517e-05	0.000159485	0	0	0	0	0.00720818	0.00149316	0.00149316	0.00739216	6.72517e-05	0	0	0.00895258	16.6786	82.5702	0.7512	0	0	82.5702	17.4298	0.7512	99.2488
EIO.MW15.P	02	A	0	0	0	0.000128085	5.51731e-05	9.05071e-05	0	0	7.52117e-05	0	0.00480877	0.00082563	0.00082563	0.00491319	5.51731e-05	0	7.52117e-05	0.00579399	14.2498	84.798	0.952248	0	1.28146	84.798	15.202	0.952248	99.0478
EIO.MW15.P	02	B	0	0	0	0.00023033	5.89418e-05	8.78093e-05	0	0	7.48981e-05	0	0.00421102	0.000655346	0.000655346	0.00431232	5.89418e-05	0	7.48981e-05	0.00502661	13.0375	85.7899	1.1726	0	1.46816	85.7899	14.2101	1.1726	98.8274
EIO.MW15.P	03	A	0	0	0	0.000178448	4.94686e-05	0.000245396	0	0	0.000161765	0	0.0129886	0.00192402	0.00192402	0.0132717	4.94686e-05	0	0.000161765	0.0152452	12.6205	87.055	0.324487	0	1.04995	87.055	12.945	0.324487	99.6755
EIO.MW15.P	03	B	0	0	0	0.000198512	5.23368e-05	0.000185361	0	0	0.000176983	0	0.0144865	0.00207134	0.00207134	0.0147004	5.23368e-05	0	0.000176983	0.016824	12.3118	87.3771	0.311083	0	1.04101	87.3771	12.6229	0.311083	99.6889
EIO.MW15.P	04	A	0	0	4.55896e-05	0.000187414	3.39569e-05	0.000209693	0	0	0	0	0.0128714	0.0018404	0.00189237	0.0131133	3.39569e-05	0	0	0.0150396	12.5826	87.1917	0.225783	0	0	87.1917	12.8083	0.225783	99.7742
EIO.MW15.P	04	B	0	0	5.29428e-05	0.000170801	4.09285e-05	0.000244893	0	0	0	0	0.00635205	0.000915143	0.000975493	0.00663456	4.09285e-05	0	0	0.00765098	12.7499	86.7151	0.534945	0	0	86.7151	13.2849	0.534945	99.4651
EIO.MW15.P	05	A	0	0	0	0.000230202	3.56058e-05	0	0	0	0	0	0.00295217	0.000802261	0.000802261	0.00295217	3.56058e-05	0	0	0.00379004	21.1676	77.8929	0.939459	0	0	77.8929	22.1071	0.939459	99.0605
EIO.MW15.P	05	B	0	0	0	0.000215232	3.01792e-05	0	0	0	0	0	0.00288424	0.000795133	0.000795133	0.00288424	3.01792e-05	0	0	0.00370955	21.4348	77.7517	0.813553	0	0	77.7517	22.2483	0.813553	99.1864
EIO.MW15.P	06	A	0	0	0	0.000187994	7.1946e-05	0.000138708	0	0	0	0	0.00546239	0.0016237	0.0016237	0.0056224	7.1946e-05	0	0	0.00731805	22.1876	76.8292	0.983131	0	0	76.8292	23.1708	0.983131	99.0169
EIO.MW15.P	06	B	0	0	0	0.000353884	7.75789e-05	0.000180112	0	0	0	0	0.00547766	0.00173692	0.00173692	0.00568544	7.75789e-05	0	0	0.00749994	23.1591	75.8065	1.03439	0	0	75.8065	24.1935	1.03439	98.9656
EIO.MW15.P	07	A	0	0	0	0.000228888	4.26257e-05	0.00016202	0	0	7.56914e-05	0	0.00471034	0.000597695	0.000597695	0.00489725	4.26257e-05	0	7.56914e-05	0.00553757	10.7935	88.4368	0.769754	0	1.34844	88.4368	11.5632	0.769754	99.2302
EIO.MW15.P	07	B	0	0	0	0.00017909	5.2735e-05	0.000144038	0	0	5.50385e-05	0	0.00435526	0.000558703	0.000558703	0.00452143	5.2735e-05	0	5.50385e-05	0.00513286	10.8848	88.0878	1.0274	0	1.0609	88.0878	11.9122	1.0274	98.9726
EIO.MW15.P	08	A	0	0	9.40293e-05	0.000121076	3.45474e-05	0	0	0	0	0.000113852	0.0157952	0.00496368	0.00507087	0.0157952	3.45474e-05	0	0.000129685	0.0209006	24.2618	75.5729	0.165294	0	0.616658	75.5729	24.4271	0.165294	99.8347
EIO.MW15.P	08	B	0	0	8.80899e-05	8.80435e-05	6.11072e-05	0	0	0	0	0.000126457	0.0155468	0.00500293	0.00510334	0.0155468	6.11072e-05	0	0.000144042	0.0207113	24.6404	75.0645	0.295043	0	0.690673	75.0645	24.9355	0.295043	99.705
EIO.MW15.P	09	A	0	0	0	0.000138122	6.28542e-05	0	0	0	0	0	0.0023612	0.00016561	0.00016561	0.0023612	6.28542e-05	0	0	0.00258966	6.39504	91.1778	2.42712	0	0	91.1778	8.82216	2.42712	97.5729
EIO.MW15.P	09	B	0	0	0	8.11653e-05	4.42129e-05	0	0	0	0	0	0.00228848	0.000352976	0.000352976	0.00228848	4.42129e-05	0	0	0.00268567	13.143	85.2108	1.64625	0	0	85.2108	14.7892	1.64625	98.3537
EIO.MW15.P	10	A	0	0	6.86005e-05	4.1752e-05	7.05223e-05	0	0	0	0	8.59597e-05	0.0170765	0.00447234	0.00455054	0.0170765	7.05223e-05	0	9.79134e-05	0.0216976	20.9726	78.7024	0.325024	0	0.449237	78.7024	21.2976	0.325024	99.675
EIO.MW15.P	10	B	0	0	0.000118414	7.61647e-05	6.19971e-05	0	0	0	0	0.000117224	0.0190964	0.00463104	0.00476602	0.0190964	6.19971e-05	0	0.000133525	0.0239244	19.9212	79.8197	0.259138	0	0.555015	79.8197	20.1803	0.259138	99.7409
EIO.MW15.P	11	A	0	0	0	0.000122598	8.08516e-05	0.000165766	0	0	0	0	0.0112613	0.0021616	0.0021616	0.0114525	8.08516e-05	0	0	0.013695	15.7839	83.6258	0.590374	0	0	83.6258	16.3742	0.590374	99.4096
EIO.MW15.P	11	B	0	0	0	0.000113865	4.57952e-05	0.000209461	0	0	0	0	0.0131342	0.002482	0.002482	0.0133759	4.57952e-05	0	0	0.0159037	15.6065	84.1056	0.287954	0	0	84.1056	15.8944	0.287954	99.712
EIO.MW15.P	12	A	0	0	0	7.04912e-05	4.61393e-05	0.000128569	0	0	0	0	0.00350968	0.000918218	0.000918218	0.003658	4.61393e-05	0	0	0.00462236	19.8647	79.1371	0.998176	0	0	79.1371	20.8629	0.998176	99.0018
EIO.MW15.P	12	B	0	0	0	0.000100447	2.28226e-05	0.000153044	0	0	0	0	0.00336624	0.00093165	0.00093165	0.00354279	2.28226e-05	0	0	0.00449727	20.7159	78.7766	0.507478	0	0	78.7766	21.2234	0.507478	99.4925
EIO.MW15.P	13	A	0	0	0	0.000118124	4.86376e-05	0.000159156	0	0	0	0	0.00582442	0.0018587	0.0018587	0.00600803	4.86376e-05	0	0	0.00791537	23.4822	75.9033	0.614471	0	0	75.9033	24.0967	0.614471	99.3855
EIO.MW15.P	13	B	0	0	0	9.8926e-05	5.07409e-05	0.000149195	0	0	0	0	0.0052107	0.00166409	0.00166409	0.00538282	5.07409e-05	0	0	0.00709764	23.4456	75.8395	0.714897	0	0	75.8395	24.1605	0.714897	99.2851
EIO.MW15.P	14	A	0	0	0	0	3.25421e-05	0.000160373	0	0	0	0	0.00543614	0.000504666	0.000504666	0.00562115	3.25421e-05	0	0	0.00615836	8.19481	91.2768	0.528422	0	0	91.2768	8.72323	0.528422	99.4716
EIO.MW15.P	14	B	0	0	0	0	4.1457e-05	0.000116717	0	0	0	0	0.00344553	0.000394841	0.000394841	0.00358017	4.1457e-05	0	0	0.00401647	9.83055	89.1373	1.03217	0	0	89.1373	10.8627	1.03217	98.9678
EIO.MW15.P	15	A	0	0	0	0.000132043	2.28253e-05	0.000128529	0	0	0	5.63895e-05	0.00474436	0.00204388	0.00204388	0.00489264	2.28253e-05	0	6.42311e-05	0.00695934	29.3688	70.3032	0.327981	0	0.914507	70.3032	29.6968	0.327981	99.672
EIO.MW15.P	15	B	0	0	0	0.000120507	2.54791e-05	0.00012562	0	0	0	7.15109e-05	0.00497877	0.00223949	0.00223949	0.00512369	2.54791e-05	0	8.14553e-05	0.00738866	30.3098	69.3454	0.344841	0	1.09042	69.3454	30.6546	0.344841	99.6552
EIO.MW15.P	16	A	0	0	0	0.000144928	2.66463e-05	0.000175159	0	0	0	0.000150931	0.00824707	0.00241004	0.00241004	0.00844914	2.66463e-05	0	0.000171919	0.0108858	22.1393	77.6159	0.24478	0	1.55474	77.6159	22.3841	0.24478	99.7552
EIO.MW15.P	16	B	0	0	0	0.000147547	4.61317e-05	0.000187281	0	0	0	0.000135856	0.00680765	0.00179292	0.00179292	0.0070237	4.61317e-05	0	0.000154748	0.00886275	20.2299	79.2496	0.520513	0	1.71608	79.2496	20.7504	0.520513	99.4795
EIO.MW15.P	17	A	0	0	0	0	3.72973e-05	0.000128306	0	0	0	0	0.00332439	0.00072847	0.00072847	0.00347241	3.72973e-05	0	0	0.00423818	17.1883	81.9317	0.88003	0	0	81.9317	18.0683	0.88003	99.12
EIO.MW15.P	17	B	0	0	0	0	3.28649e-05	0.000150195	0	0	0	0	0.00346573	0.00059581	0.00059581	0.003639	3.28649e-05	0	0	0.00426767	13.961	85.2689	0.77009	0	0	85.2689	14.7311	0.77009	99.2299
EIO.MW15.P	18	A	0	0	0	0	5.39669e-05	0.000110726	0	0	0	0	0.00309957	0.000374396	0.000374396	0.00322731	5.39669e-05	0	0	0.00365567	10.2415	88.2822	1.47625	0	0	88.2822	11.7178	1.47625	98.5237
EIO.MW15.P	18	B	0	0	0	0	4.01815e-05	9.63185e-05	0	0	0	0	0.00319897	0.000530929	0.000530929	0.00331009	4.01815e-05	0	0	0.0038812	13.6795	85.2852	1.03529	0	0	85.2852	14.7148	1.03529	98.9647
EIO.MW15.P	19	A	0	0	0	0	4.44055e-05	0	0	0	0	0	0.00284317	0.000966074	0.000966074	0.00284317	4.44055e-05	0	0	0.00385365	25.0691	73.7786	1.1523	0	0	73.7786	26.2214	1.1523	98.8477
EIO.MW15.P	19	B	0	0	0	0	5.18789e-05	0	0	0	0	0	0.00279906	0.000967216	0.000967216	0.00279906	5.18789e-05	0	0	0.00381816	25.332	73.3093	1.35874	0	0	73.3093	26.6907	1.35874	98.6413
EIO.MW15.P	20	A	0	0	0	0	4.56023e-05	0.000129258	0	0	0	0	0.00629018	0.000838081	0.000838081	0.0064393	4.56023e-05	0	0	0.00732298	11.4445	87.9327	0.622729	0	0	87.9327	12.0673	0.622729	99.3773
EIO.MW15.P	20	B	0	0	0	0	6.04867e-05	0.000139037	0	0	0	0	0.0071942	0.000966106	0.000966106	0.0073546	6.04867e-05	0	0	0.00838119	11.5271	87.7512	0.721696	0	0	87.7512	12.2488	0.721696	99.2783
EIO.MW15.P	21	A	0	0	0	0	2.16772e-05	0.00018478	0	0	2.24196e-05	0	0.0130917	0.00148417	0.00148417	0.0133049	2.16772e-05	0	2.24196e-05	0.0148107	10.0209	89.8327	0.146362	0	0.151146	89.8327	10.1673	0.146362	99.8536
EIO.MW15.P	21	B	0	0	0	0	2.79889e-05	0.000179401	0	0	4.09014e-05	0	0.0156042	0.00157293	0.00157293	0.0158111	2.79889e-05	0	4.09014e-05	0.017412	9.0336	90.8057	0.160744	0	0.234353	90.8057	9.19435	0.160744	99.8393
EIO.MW15.P	22	A	0	0	0	0	5.17037e-05	0.000256426	0	0	0.0003093	0	0.0344842	0.00256698	0.00256698	0.03478	5.17037e-05	0	0.0003093	0.0373987	6.86382	92.9979	0.13825	0	0.820251	92.9979	7.00207	0.13825	99.8617
EIO.MW15.P	22	B	0	0	0	0	3.18163e-05	0.000309832	0	0	0.000220132	0	0.0281997	0.00216315	0.00216315	0.0285571	3.18163e-05	0	0.000220132	0.0307521	7.03416	92.8624	0.103461	0	0.710741	92.8624	7.13762	0.103461	99.8965
EIO.MW17.01	01	A	0	0	0	0	0.00183213	0	0	0.000300942	0	0	0.000689659	0.0017474	0.0017474	0.000689659	0.00183213	0.000300942	0	0.00457014	38.2352	15.0906	40.0893	6.58496	0	21.6755	78.3245	46.6742	53.3258
EIO.MW17.01	01	B	0	0	0	0	0.00163874	0	0	0.000281647	0	0	0.00078964	0.00196089	0.00196089	0.00078964	0.00163874	0.000281647	0	0.00467091	41.9808	16.9055	35.0839	6.02981	0	22.9353	77.0647	41.1137	58.8863
EIO.MW17.01	01	A	0	0	0.00010184	0	0.0122142	0	0	0.00103635	0.00246594	0.000107718	0.00174336	0.00853124	0.00864733	0.00174336	0.0122142	0.00103635	0.00258863	0.0236412	36.5774	7.37426	51.6647	4.38367	9.86904	11.7579	88.2421	56.0484	43.9516
EIO.MW17.01	01	B	0	0	6.51279e-05	0	0.0125677	0	0	0.00104561	0.00293343	0.000196862	0.00176368	0.00945467	0.00952891	0.00176368	0.0125677	0.00104561	0.00315767	0.0249059	38.2597	7.08139	50.4607	4.19826	11.2518	11.2796	88.7204	54.6589	45.3411
EIO.MW17.01	02	A	0	0.000219409	0	0.000215412	0.0675603	0	0	0.000663399	0.00734667	0.000110923	0.000217759	0.00251067	0.00251067	0.000217759	0.0678104	0.000663399	0.00747302	0.0712023	3.5261	0.305831	95.2364	0.931711	9.49856	1.23754	98.7625	96.1681	3.83193
EIO.MW17.01	02	B	0	0.000249955	0	0.000239996	0.0806702	0	0	0.000829865	0.0114686	0.00010755	0.00018601	0.0032856	0.0032856	0.00018601	0.0809551	0.000829865	0.0115911	0.0852566	3.85378	0.218177	94.9547	0.973373	11.9684	1.19155	98.8084	95.928	4.07196
EIO.MW17.01	03	A	0	0.000220777	0	0.000144431	0.0811062	0	0	0.000622414	0.00788335	0.000165998	0.000385552	0.00355692	0.00355692	0.000385552	0.0813579	0.000622414	0.00807243	0.0859228	4.13967	0.448719	94.6872	0.724388	8.58813	1.17311	98.8269	95.4116	4.58839
EIO.MW17.01	03	B	0	0.000215196	0	0.00015916	0.0624807	0	0	0.000493058	0.00660902	0.000163399	0.000158734	0.00266392	0.00266392	0.000158734	0.062726	0.000493058	0.00679514	0.0660417	4.03369	0.240354	94.9794	0.746586	9.32927	0.98694	99.0131	95.726	4.27404
EIO.MW17.01	04	A	0	0.000122207	0	0	0.0472405	0	0	0.000907642	0.00242488	8.34721e-05	0.000203168	0.00103577	0.00103577	0.000203168	0.0473798	0.000907642	0.00251996	0.0495264	2.09136	0.410221	95.6658	1.83264	4.84177	2.24286	97.7571	97.4984	2.50158
EIO.MW17.01	04	B	0	0.000122607	0	0	0.0457926	0	0	0.000859015	0.00324591	0.000113453	0.000167328	0.00149388	0.00149388	0.000167328	0.0459324	0.000859015	0.00337514	0.0484526	3.08317	0.345344	94.7986	1.7729	6.51223	2.11824	97.8818	96.5715	3.42852
EIO.MW17.01	05	A	0	0.000229535	0	0	0.0348123	0	0	0.000795039	0.000281346	0.000121447	0.00014784	0.00137896	0.00137896	0.00014784	0.0350739	0.000795039	0.000419682	0.0373958	3.68747	0.395339	93.7912	2.12601	1.10982	2.52135	97.4786	95.9172	4.08281
EIO.MW17.01	05	B	0	0.000235468	0	0	0.0337384	0	0	0.000733469	0.000210175	0.000107973	0.000226798	0.00148227	0.00148227	0.000226798	0.0340068	0.000733469	0.000333162	0.0364493	4.06665	0.622228	93.2988	2.0123	0.905764	2.63453	97.3655	95.3111	4.68888
EIO.MW17.09	01	A	0	0.000352848	0.000183518	0	0.0474874	0	0	0.000374136	0	0.000318011	0.000568637	0.0195534	0.0197626	0.000568637	0.0478896	0.000374136	0.000362234	0.068595	28.8105	0.828977	69.8151	0.545428	0.525303	1.37441	98.6256	70.3605	29.6395
EIO.MW17.09	01	B	0	0.000373171	0.00019476	0	0.0502551	0	0	0.000391884	0	0.000327549	0.000563398	0.0197899	0.0200119	0.000563398	0.0506805	0.000391884	0.000373098	0.0716477	27.931	0.786345	70.7357	0.54696	0.518042	1.3333	98.6667	71.2826	28.7174
EIO.MW17.09	02	A	0	7.46714e-05	7.38745e-05	0.000449013	0.00587627	0	0	0.00010937	0.00144195	0.000256175	0.00017924	0.00458195	0.00466616	0.00017924	0.00596138	0.00010937	0.00173375	0.0109162	42.7455	1.64197	54.6107	1.00191	13.7057	2.64388	97.3561	55.6126	44.3874
EIO.MW17.09	02	B	0	9.71448e-05	0.000114365	0.00185063	0.0053983	0	0	0.000150105	0.00294162	0.000271902	0.000263252	0.00438884	0.00451921	0.000263252	0.00550904	0.000150105	0.00325133	0.0104416	43.2808	2.52119	52.7604	1.43757	23.7446	3.95875	96.0412	54.198	45.802
EIO.MW17.08	01	A	0	0	0.000149306	0.00118451	0.00195448	0	0	8.21418e-05	0.00158247	0.000321543	0.000114864	0.00456454	0.00473473	0.000114864	0.00195448	8.21418e-05	0.00194873	0.00688622	68.7566	1.66802	28.3825	1.19284	22.0571	2.86087	97.1391	29.5754	70.4246
EIO.MW17.08	01	B	0	0	0.000204926	0.00124335	0.00264162	0	0	9.26458e-05	0.00199271	0.000339847	0.000129315	0.00577117	0.00600477	0.000129315	0.00264162	9.26458e-05	0.00237982	0.00886835	67.7101	1.45817	29.787	1.04468	21.1574	2.50285	97.4972	30.8317	69.1683
EIO.MW17.08	02	A	0	0	0.000134948	0.000560978	0.00627813	0	0	0.000470353	0.00288142	0.000528487	0.00119276	0.00976312	0.00991695	0.00119276	0.00627813	0.000470353	0.00348339	0.0178582	55.5317	6.67906	35.1555	2.63382	16.3221	9.31288	90.6871	37.7893	62.2107
EIO.MW17.08	02	B	0	0	0.000132454	0.000487155	0.00742936	0	0	0.00052867	0.00402657	0.000621371	0.00140689	0.0113251	0.0114761	0.00140689	0.00742936	0.00052867	0.00473435	0.020841	55.065	6.75058	35.6478	2.53668	18.5114	9.28726	90.7127	38.1845	61.8155
EIO.MW17.08	03	A	0	0.000112995	0	0.000734791	0.010424	0	0	0.000291022	0.000233001	8.35414e-05	8.39798e-05	0.000675986	0.000675986	8.39798e-05	0.0105528	0.000291022	0.00032816	0.0116038	5.82555	0.723725	90.9427	2.50798	2.75025	3.23171	96.7683	93.4507	6.54927
EIO.MW17.08	03	B	0	0.000107628	0	0.000640564	0.0108837	0	0	0.000287834	0.000324923	0.000119706	8.35089e-05	0.00064044	0.00064044	8.35089e-05	0.0110064	0.000287834	0.000461276	0.0120182	5.32892	0.694854	91.5812	2.39499	3.69628	3.08984	96.9102	93.9762	6.02377
EIO.MW17.08	04	A	0	0	0.000152745	0.000448115	6.00948e-05	0	0	0	0.00146722	0.000234549	0.000281441	0.0106167	0.0107908	0.000281441	6.00948e-05	0	0.00173438	0.0111324	96.932	2.52814	0.539821	0	13.4796	2.52814	97.4719	0.539821	99.4602
EIO.MW17.08	04	B	0	0	0.000135134	0.000459557	5.05936e-05	0	0	0	0.00191284	0.000241254	0.000375496	0.0116351	0.0117891	0.000375496	5.05936e-05	0	0.00218764	0.0122152	96.5118	3.074	0.414185	0	15.1889	3.074	96.926	0.414185	99.5858
EIO.MW17.08	05	A	0	0	0.000171767	0.000714371	6.84076e-05	0	0	0.000131683	0.00456316	0.000902951	0.00231267	0.0128201	0.0130159	0.00231267	6.84076e-05	0.000131683	0.00559168	0.0155287	83.8186	14.8929	0.440524	0.848	26.4753	15.7409	84.2591	1.28852	98.7115
EIO.MW17.08	05	B	0	0	0.000205888	0.000974757	7.0158e-05	0	0	0.000127907	0.00525344	0.00086451	0.00234705	0.0143289	0.0145635	0.00234705	7.0158e-05	0.000127907	0.00623817	0.0171087	85.1238	13.7185	0.410073	0.747613	26.7195	14.4661	85.5339	1.15769	98.8423
EIO.MW17.08	06	A	0	0.000107677	0	0.000766373	0.00919404	0	0	0.000563746	0.000876632	0.000720922	9.62443e-05	0.000547336	0.000547336	9.62443e-05	0.00931678	0.000563746	0.00169781	0.0105241	5.20078	0.914513	88.528	5.35672	13.8915	6.27123	93.7288	93.8847	6.1153
EIO.MW17.08	06	B	0	0.000111012	0	0.000862099	0.00921223	0	0	0.00057822	0.000957837	0.000783243	8.62176e-05	0.000469631	0.000469631	8.62176e-05	0.00933877	0.00057822	0.00185	0.0104728	4.48428	0.823249	89.1713	5.52114	15.0128	6.34439	93.6556	94.6925	5.30753
EIO.MW17.08	07	A	0	0	0	0.000783227	0.00686604	0	0	0.000149275	0.00225626	0.000415344	0	0.000298182	0.000298182	0	0.00686604	0.000149275	0.00272936	0.0073135	4.07715	0	93.8818	2.04109	27.1771	2.04109	97.9589	95.9229	4.07715
EIO.MW17.08	07	B	0	0	0	0.000728913	0.00596503	0	0	0.000156783	0.00189053	0.000370055	0	0.000282815	0.000282815	0	0.00596503	0.000156783	0.00231205	0.00640463	4.41579	0	93.1362	2.44797	26.5244	2.44797	97.552	95.5842	4.41579
EIO.MW17.08	08	A	0	7.64906e-05	0	0.000483922	0.00844433	0	0	0.000143429	0.000235943	0.000234314	0	0.000541652	0.000541652	0	0.00853152	0.000143429	0.000502841	0.0092166	5.87692	0	92.5669	1.5562	5.17356	1.5562	98.4438	94.1231	5.87692
EIO.MW17.08	08	B	0	7.69346e-05	0	0.000331161	0.00851611	0	0	0.000127381	0.000271054	0.000211649	0	0.000479443	0.000479443	0	0.00860381	0.000127381	0.000512135	0.00921063	5.20532	0	93.4117	1.38298	5.26737	1.38298	98.617	94.7947	5.20532
EIO.MW17.08	09	A	0	0	0	0.000497691	0.00666899	0	0	0.00026423	0.00126287	0.000312525	0.00032772	0.00399336	0.00399336	0.00032772	0.00666899	0.00026423	0.00161885	0.0112543	35.4829	2.91195	59.2573	2.34781	12.5754	5.25976	94.7402	61.6051	38.3949
EIO.MW17.08	09	B	0	0	0	0.000458945	0.00491098	0	0	0.000225877	0.000455044	0.000269655	0.000264203	0.00284832	0.00284832	0.000264203	0.00491098	0.000225877	0.000762198	0.00824938	34.5277	3.2027	59.5315	2.73811	8.45798	5.9408	94.0592	62.2696	37.7304
EIO.MW17.08	10	A	0	0	0	0.000807664	0.00739745	0	0	0.000591324	0.00300426	0	0	0	0	0	0.00739745	0.000591324	0.00300426	0.00798878	0	0	92.5981	7.40193	27.3287	7.40193	92.5981	100	0
EIO.MW17.08	10	B	0	0	0	0.000817687	0.00608503	0	0	0.000476484	0.00314484	0	0	0	0	0	0.00608503	0.000476484	0.00314484	0.00656151	0	0	92.7382	7.26179	32.3998	7.26179	92.7382	100	0
EIO.MW17.38	01	A	0	0.00019168	0	0.000121627	0.0361425	0	0	0.000330593	0.000673999	0.000199426	0	0.00155719	0.00155719	0	0.036361	0.000330593	0.000901158	0.0382488	4.07121	0	95.0645	0.864322	2.30181	0.864322	99.1357	95.9288	4.07121
EIO.MW17.38	01	B	0	0.000190233	0	6.54738e-05	0.0255277	0	0	0.000263311	0.000256442	0.000151586	0	0.00115236	0.00115236	0	0.0257446	0.000263311	0.000429108	0.0271602	4.24282	0	94.7877	0.969473	1.55534	0.969473	99.0305	95.7572	4.24282
EIO.MW17.38	02	A	0	0.00013635	0	0	0.00865921	0	0	0.000548512	5.86317e-05	9.66981e-05	0.000112669	0.000416981	0.000416981	0.000112669	0.00881464	0.000548512	0.000168777	0.0098928	4.215	1.1389	89.1015	5.54456	1.67744	6.68346	93.3165	94.6461	5.3539
EIO.MW17.38	02	B	0	0.000151991	0	0	0.00900627	0	0	0.000693524	8.34888e-05	0.000123401	0.00016411	0.000323353	0.000323353	0.00016411	0.00917952	0.000693524	0.00022405	0.0103605	3.12102	1.58399	88.6011	6.69391	2.11676	8.27791	91.7221	95.295	4.70501
EIO.MW17.38	03	A	0	0.000140168	0	0.000143298	0.0303425	0	0	0.000576461	0.000674677	0.000230063	0.0002517	0.00139784	0.00139784	0.0002517	0.0305023	0.000576461	0.000936732	0.0327283	4.27105	0.769058	93.1985	1.76135	2.78251	2.53041	97.4696	94.9599	5.04011
EIO.MW17.38	03	B	0	0.000162829	0	0.000117994	0.0273764	0	0	0.000523506	0.000547915	0.000224252	0.000244131	0.00125267	0.00125267	0.000244131	0.027562	0.000523506	0.000803352	0.0295823	4.23453	0.825259	93.1706	1.76966	2.64385	2.59492	97.4051	94.9402	5.05979
EIO.MW17.38	04	A	0	0.000186336	0	0.000113783	0.00997007	0	0	6.10484e-05	0	0.00108039	0	0.000609434	0.000609434	0	0.0101825	6.10484e-05	0.00123064	0.010853	5.61537	0	93.8221	0.562505	10.1843	0.562505	99.4375	94.3846	5.61537
EIO.MW17.38	04	B	0	0.000150251	0	9.0859e-05	0.0101182	0	0	6.25271e-05	0	0.00117801	0	0.000409132	0.000409132	0	0.0102894	6.25271e-05	0.00134182	0.0107611	3.80195	0	95.617	0.581048	11.0868	0.581048	99.419	96.198	3.80195
EIO.MW17.38	05	A	0	0.000172847	0	0.000287983	0.0146983	0	0	0.000262137	0.000175157	0.000264491	0.000119076	0.000480941	0.000480941	0.000119076	0.0148953	0.000262137	0.000476428	0.0157574	3.05215	0.755682	94.5286	1.66358	2.93478	2.41926	97.5807	96.1922	3.80783
EIO.MW17.38	05	B	0	0.000190388	0	0.000343753	0.0152444	0	0	0.000263744	0.000235119	0.000219053	0.000110445	0.000543769	0.000543769	0.000110445	0.0154615	0.000263744	0.000484634	0.0163794	3.31983	0.674292	94.3957	1.61021	2.87377	2.28451	97.7155	96.0059	3.99412
EIO.MW17.38	06	A	0	0.000252538	0	7.17451e-05	0.0415896	0	0	0.000507332	0.00081699	0.000164171	0.000118085	0.00185379	0.00185379	0.000118085	0.0418774	0.000507332	0.00100399	0.0443566	4.17928	0.266217	94.4107	1.14376	2.21335	1.40997	98.59	95.5545	4.4455
EIO.MW17.38	06	B	0	0.00022005	0	9.62419e-05	0.0468844	0	0	0.000513179	0.00111374	0.000219666	0.000108603	0.00186859	0.00186859	0.000108603	0.0471352	0.000513179	0.00136395	0.0496256	3.76538	0.218845	94.9817	1.0341	2.67496	1.25295	98.7471	96.0158	3.98422
EIO.MW17.38	07	A	0	0.000137944	0	0	0.0217128	0	0	0.000224976	0.000680133	8.60904e-05	7.5816e-05	0.000878141	0.000878141	7.5816e-05	0.02187	0.000224976	0.000778195	0.0230489	3.8099	0.328935	94.8851	0.976079	3.266	1.30501	98.695	95.8612	4.13883
EIO.MW17.38	07	B	0	0.000136988	0	0	0.01723	0	0	0.000149868	0.00046055	8.14276e-05	9.19512e-05	0.000803527	0.000803527	9.19512e-05	0.0173861	0.000149868	0.000553301	0.0184315	4.35954	0.498881	94.3285	0.813109	2.91444	1.31199	98.688	95.1416	4.85842
EIO.MW17.38	08	A	0	8.72047e-05	0	0.000107701	0.0161989	0	0	0.000203665	0.00037088	0.00012387	0	0.000798604	0.000798604	0	0.0162983	0.000203665	0.000511975	0.0173005	4.61606	0	94.2067	1.17722	2.87424	1.17722	98.8228	95.3839	4.61606
EIO.MW17.38	08	B	0	0.00013881	0	8.68038e-05	0.0168816	0	0	0.000161402	0.000296552	0.000125907	0	0.000776602	0.000776602	0	0.0170399	0.000161402	0.000439967	0.0179779	4.31976	0	94.7825	0.897782	2.38881	0.897782	99.1022	95.6802	4.31976
EIO.MW17.38	09	A	0	0.000152532	0	8.23551e-05	0.0129294	0	0	0.000413302	0.000561176	0.000159527	0.000132987	0.000630382	0.000630382	0.000132987	0.0131033	0.000413302	0.000742887	0.0142799	4.41446	0.931282	91.76	2.89428	4.94506	3.82556	96.1744	94.6543	5.34574
EIO.MW17.38	09	B	0	0.000139756	0	0.000182352	0.0113191	0	0	0.000377144	0.000302301	0.000126741	0.000125931	0.000557992	0.000557992	0.000125931	0.0114784	0.000377144	0.000446667	0.0125394	4.4499	1.00428	91.5382	3.00766	3.43958	4.01194	95.9881	94.5458	5.45417
EIO.MW17.39	01	A	0	0.000158922	0	0.00050967	0.0147036	0	0	0.0001935	0.000164414	9.17522e-05	0.000166486	0.000982437	0.000982437	0.000166486	0.0148848	0.0001935	0.000268926	0.0162272	6.05427	1.02597	91.7273	1.19244	1.63024	2.21842	97.7816	92.9198	7.08024
EIO.MW17.39	01	B	0	0.00020672	0	0.000463418	0.0149328	0	0	0.000230012	0.000155359	0.000108146	0.000184152	0.00099148	0.00099148	0.000184152	0.0151685	0.000230012	0.000278544	0.0165741	5.98211	1.11108	91.519	1.38778	1.65282	2.49886	97.5011	92.9068	7.09319
EIO.MW17.39	02	A	0	0.000152737	0	0	0.00477644	0	0	0.000127791	0	0	0	0.000330125	0.000330125	0	0.00495055	0.000127791	0	0.00540847	6.10387	0	91.5333	2.36279	0	2.36279	97.6372	93.8961	6.10387
EIO.MW17.39	02	B	0	0.000115952	0	0	0.00457285	0	0	0.000127888	0	0	0	0.00018172	0.00018172	0	0.00470503	0.000127888	0	0.00501464	3.6238	0	93.8259	2.5503	0	2.5503	97.4497	96.3762	3.6238
EIO.MW17.39	03	A	0	0.000185975	0	7.94196e-05	0.017309	0	0	0.000886663	7.25174e-05	0	8.40996e-05	0.000755174	0.000755174	8.40996e-05	0.017521	0.000886663	7.25174e-05	0.0192469	3.92361	0.436951	91.0327	4.60678	0.37536	5.04373	94.9563	95.6394	4.36056
EIO.MW17.39	03	B	0	0.000181315	0	9.57548e-05	0.0180618	0	0	0.000917031	0.00015551	0	9.99837e-05	0.000851588	0.000851588	9.99837e-05	0.0182685	0.000917031	0.00015551	0.0201371	4.22895	0.496515	90.7206	4.55394	0.766337	5.05045	94.9495	95.2745	4.72547
EIO.MW17.39	04	A	0	0	0	0	0.048719	0	0	0.00133458	0.00137166	0.000223211	0	0.00185242	0.00185242	0	0.048719	0.00133458	0.00162591	0.051906	3.5688	0	93.86	2.57115	3.03728	2.57115	97.4288	96.4312	3.5688
EIO.MW17.39	04	B	0	0	0	0	0.018903	0	0	0.000584338	0.000506822	6.55634e-05	0	0.000622643	0.000622643	0	0.018903	0.000584338	0.000581502	0.02011	3.09618	0	93.9981	2.90571	2.81034	2.90571	97.0943	96.9038	3.09618
EIO.MW17.39	05	A	0	0.000134107	0	0.000137034	0.0209201	0	0	0.00156891	0.000555982	0.000293721	0.000215279	0.000908308	0.000908308	0.000215279	0.021073	0.00156891	0.000890549	0.0237655	3.82196	0.905848	88.6706	6.60163	3.61189	7.50748	92.4925	95.2722	4.72781
EIO.MW17.39	05	B	0	0.000129946	0	7.64154e-05	0.0182413	0	0	0.00124642	0.00058441	0.000254174	0.000198463	0.000965648	0.000965648	0.000198463	0.0183894	0.00124642	0.00087393	0.0208	4.64255	0.954149	88.4109	5.99242	4.03218	6.94657	93.0534	94.4033	5.5967
EIO.MW17.39	06	A	0	0.000111447	0	8.37652e-05	0.0124483	0	0	0.000279437	0.000163043	0	0.000371825	0.00611478	0.00611478	0.000371825	0.0125753	0.000279437	0.000163043	0.0193413	31.615	1.92244	65.0178	1.44477	0.835928	3.3672	96.6328	66.4625	33.5375
EIO.MW17.39	06	B	0	9.96595e-05	0	7.46987e-05	0.0134071	0	0	0.000321496	0.000175884	0	0.000407116	0.00678297	0.00678297	0.000407116	0.0135207	0.000321496	0.000175884	0.0210323	32.2503	1.93567	64.2855	1.52859	0.829323	3.46425	96.5357	65.8141	34.1859
EIO.MW17.39	07	A	0	0.000182756	0	0	0.0575803	0	0	0.000810598	0.00207151	0.000128817	0.000102708	0.00225262	0.00225262	0.000102708	0.0577886	0.000810598	0.00221824	0.0609546	3.69558	0.1685	94.8061	1.32984	3.51139	1.49834	98.5017	96.1359	3.86408
EIO.MW17.39	07	B	0	0.000188337	0	0	0.0561024	0	0	0.000819931	0.00137195	0.000104567	0.000127141	0.00220462	0.00220462	0.000127141	0.0563171	0.000819931	0.00149106	0.0594688	3.70719	0.213795	94.7003	1.37876	2.44596	1.59255	98.4074	96.079	3.92098
EIO.MW17.39	08	A	0	0	0	0	0.00776931	0	0	0.000383818	0.000236121	0	0.000132259	0.000421141	0.000421141	0.000132259	0.00776931	0.000383818	0.000236121	0.00870653	4.83707	1.51908	89.2355	4.40839	2.64039	5.92747	94.0725	93.6439	6.35615
EIO.MW17.39	08	B	0	0	0	0	0.00679613	0	0	0.000369791	0.000284764	0	8.62403e-05	0.000288968	0.000288968	8.62403e-05	0.00679613	0.000369791	0.000284764	0.00754113	3.8319	1.1436	90.1209	4.90365	3.63874	6.04725	93.9528	95.0245	4.9755
EIO.MW17.39	09	A	0	0	0	0	0.0172385	0	0	0.00591049	0.00303464	0	0.00159472	0.000641766	0.000641766	0.00159472	0.0172385	0.00591049	0.00303464	0.0253854	2.52809	6.28203	67.9069	23.283	10.6778	29.565	70.435	91.1899	8.81011
EIO.MW17.39	09	B	0	0	0	0	0.0141805	0	0	0.00490774	0.00210143	0	0.00129436	0.000845536	0.000845536	0.00129436	0.0141805	0.00490774	0.00210143	0.0212282	3.98309	6.0974	66.8005	23.119	9.0076	29.2164	70.7836	89.9195	10.0805
EIO.MW17.42	01	A	0	0	0.000322965	0.000186185	0.000168675	0	0	6.38558e-05	0.000232543	0.00076906	0.00305679	0.0399371	0.0403053	0.00305679	0.000168675	6.38558e-05	0.00110855	0.0435946	92.4548	7.01184	0.386918	0.146476	2.4798	7.15832	92.8417	0.533394	99.4666
EIO.MW17.42	01	B	0	0	0.00030998	0.000192235	0.000181396	0	0	4.16148e-05	0.000501863	0.000697385	0.0032075	0.0449613	0.0453147	0.0032075	0.000181396	4.16148e-05	0.00129623	0.0487452	92.9624	6.58014	0.372131	0.0853721	2.59031	6.66551	93.3345	0.457503	99.5425
EIO.MW17.42	02	A	0	0	0.00022072	8.03284e-05	7.96906e-05	0	0	0	0.000148082	0.000463484	0.00193039	0.0281282	0.0283798	0.00193039	7.96906e-05	0	0.000676018	0.0303899	93.3857	6.35209	0.262227	0	2.17608	6.35209	93.6479	0.262227	99.7378
EIO.MW17.42	02	B	0	0	0.000224414	0.000127018	0.000111708	0	0	0	0.000160152	0.000463516	0.00189453	0.0282637	0.0285195	0.00189453	0.000111708	0	0.000688125	0.0305257	93.4277	6.20635	0.365946	0	2.20455	6.20635	93.7937	0.365946	99.6341
EIO.MW17.42	03	A	0	0	0.000187941	0.000100685	0.000140431	0	0	4.44156e-05	0.000413059	0.000411052	0.00336008	0.0362239	0.0364381	0.00336008	0.000140431	4.44156e-05	0.000881273	0.0399831	91.1339	8.40376	0.351226	0.111086	2.15658	8.51485	91.4852	0.462312	99.5377
EIO.MW17.42	03	B	0	0	0.000239758	0.00011921	0.000162046	0	0	6.63574e-05	0.000581193	0.000430234	0.00363363	0.04055	0.0408233	0.00363363	0.000162046	6.63574e-05	0.00107126	0.0446854	91.3573	8.13158	0.362638	0.148499	2.3412	8.28008	91.7199	0.511137	99.4889
EIO.MW17.42	04	A	0	0	0.000276164	0.000156292	0.000165338	0	0	0	0.00114761	0.00050998	0.00183837	0.0473022	0.047617	0.00183837	0.000165338	0	0.00172851	0.0496207	95.9619	3.70485	0.333203	0	3.36619	3.70485	96.2951	0.333203	99.6668
EIO.MW17.42	04	B	0	0	0.000280647	0.000160854	0.000216238	0	0	0	0.00132906	0.000699429	0.00235083	0.059307	0.0596269	0.00235083	0.000216238	0	0.00212575	0.062194	95.8725	3.77983	0.347682	0	3.30498	3.77983	96.2202	0.347682	99.6523
EIO.MW17.42	05	A	0	0	0.000265395	0.000181594	0.000147687	0	0	6.53072e-05	0.000366157	0.00105664	0.00241332	0.0308501	0.0311527	0.00241332	0.000147687	6.53072e-05	0.00156974	0.033779	92.225	7.14445	0.437215	0.193337	4.44071	7.33778	92.6622	0.630552	99.3694
EIO.MW17.42	05	B	0	0	0.000247703	0.000119479	0.000136725	0	0	5.18361e-05	0.000388932	0.00105142	0.00236251	0.0300727	0.0303551	0.00236251	0.000136725	5.18361e-05	0.00158656	0.0329062	92.2474	7.17955	0.415498	0.157527	4.59969	7.33708	92.6629	0.573025	99.427
EIO.MW17.42	06	A	0	0	0.000270653	0.000104143	0.000137746	0	0	0	0.00142268	0.000386297	0.00170723	0.0571992	0.0575077	0.00170723	0.000137746	0	0.00186269	0.0593527	96.8915	2.87641	0.232081	0	3.04285	2.87641	97.1236	0.232081	99.7679
EIO.MW17.42	06	B	0	0	0.000310469	0.000141109	0.000277957	0	0	0	0.0045192	0.000589066	0.00246964	0.0814789	0.0818328	0.00246964	0.000277957	0	0.00519018	0.0845804	96.7515	2.91987	0.328631	0	5.78161	2.91987	97.0801	0.328631	99.6714
EIO.MW17.42	07	A	0	0	0.000319977	0.00018192	0.000208119	0	0	0	0.0026985	0.000893761	0.00350986	0.0599861	0.0603508	0.00350986	0.000208119	0	0.00371654	0.0640688	94.1969	5.47827	0.324837	0	5.48281	5.47827	94.5217	0.324837	99.6752
EIO.MW17.42	07	B	0	0	0.000332981	0.000132704	0.000264589	0	0	0	0.0043487	0.000974122	0.00396999	0.0730577	0.0734373	0.00396999	0.000264589	0	0.00545828	0.0776719	94.5481	5.11123	0.34065	0	6.56595	5.11123	94.8888	0.34065	99.6594
EIO.MW17.47	01	A	0	8.62346e-05	0.000173351	0.000399283	0.0187866	0	0	0.000205155	0.00107747	0.000290368	0.0004515	0.0139782	0.0141758	0.0004515	0.0188849	0.000205155	0.00140822	0.0337174	42.0431	1.33907	56.0094	0.608454	4.0091	1.94753	98.0525	56.6178	43.3822
EIO.MW17.47	01	B	0	0.000100172	0.000185925	0.000394059	0.0184808	0	0	0.000207586	0.00125037	0.000330182	0.000378405	0.0127603	0.0129722	0.000378405	0.018595	0.000207586	0.00162647	0.0321532	40.3449	1.17688	57.8326	0.645615	4.81494	1.82249	98.1775	58.4782	41.5218
EIO.MW17.47	02	A	0	0	0	0.000183318	0.00164924	0	0	0.00318674	0.000847304	0.000260053	0.00511973	0.00167696	0.00167696	0.00511973	0.00164924	0.00318674	0.00114352	0.0116327	14.4159	44.0116	14.1777	27.3948	8.9504	71.4064	28.5936	41.5725	58.4275
EIO.MW17.47	02	B	0	0	0	0.000173062	0.00156829	0	0	0.0032539	0.000607413	0.000243455	0.00470054	0.00167426	0.00167426	0.00470054	0.00156829	0.0032539	0.000884723	0.011197	14.9528	41.9804	14.0063	29.0605	7.32283	71.0409	28.9591	43.0668	56.9332
EIO.MW17.47	03	A	0	0.000140942	0.000144179	0.000623187	0.0264241	0	0	0.000566155	0.00660506	0.00166767	0.000892902	0.015604	0.0157684	0.000892902	0.0265847	0.000566155	0.00850463	0.0438122	35.9909	2.03802	60.6789	1.29223	16.256	3.33026	96.6697	61.9711	38.0289
EIO.MW17.47	03	B	0	0.000140456	0.000167594	0.00066632	0.0245463	0	0	0.000514366	0.00515232	0.00172014	0.000811599	0.0151117	0.0153028	0.000811599	0.0247064	0.000514366	0.00711166	0.0413351	37.0212	1.96346	59.7709	1.24438	14.6793	3.20784	96.7922	61.0153	38.9847
EIO.MW17.47	04	A	0	9.10388e-05	0.000159702	0.000552538	0.0119358	0	0	0.000192056	0.00452395	0.0004865	0.000399957	0.0124348	0.0126168	0.000399957	0.0120396	0.000192056	0.0050781	0.0252484	49.9706	1.58408	47.6846	0.760666	16.7447	2.34475	97.6552	48.4453	51.5547
EIO.MW17.47	04	B	0	8.39763e-05	0.000150836	0.000465426	0.0106098	0	0	0.000187675	0.00201324	0.000481008	0.000359817	0.0106946	0.0108665	0.000359817	0.0107055	0.000187675	0.00256113	0.0221195	49.1264	1.62669	48.3985	0.848458	10.3771	2.47515	97.5248	49.2469	50.7531
EIO.MW17.47	05	A	0	0.000140317	0.000107064	0.000387186	0.0232033	0	0	0.000501236	0.00419116	0.00107328	0.000488805	0.00873643	0.00885847	0.000488805	0.0233633	0.000501236	0.00541368	0.0332118	26.6727	1.47178	70.3463	1.50921	14.0158	2.98099	97.019	71.8555	28.1445
EIO.MW17.47	05	B	0	0.00013251	9.57501e-05	0.000436325	0.0178163	0	0	0.000383966	0.00249521	0.000982525	0.000354899	0.00645561	0.00656475	0.000354899	0.0179673	0.000383966	0.00361436	0.0252709	25.9775	1.40438	71.0987	1.5194	12.5128	2.92377	97.0762	72.6181	27.3819
EIO.MW17.47	06	A	0	0	6.61457e-05	0.000144538	0.0082661	0	0	0.000109659	0.000417244	0.000524903	0.000136868	0.00468065	0.00475605	0.000136868	0.0082661	0.000109659	0.00101514	0.0132687	35.8442	1.03151	62.2978	0.826452	7.10692	1.85797	98.142	63.1243	36.8757
EIO.MW17.47	06	B	0	0	6.11802e-05	0.000203931	0.00959507	0	0	0.000163786	0.000527461	0.000565521	0.000168368	0.00455217	0.00462191	0.000168368	0.00959507	0.000163786	0.00117162	0.0145491	31.7676	1.15724	65.9494	1.12574	7.45272	2.28298	97.717	67.0751	32.9249
EIO.MW17.47	07	A	0	0	0.000165653	0.000353749	6.18753e-05	0	0	4.12785e-05	0.00328519	0.000889016	0.000611813	0.0165235	0.0167123	0.000611813	6.18753e-05	4.12785e-05	0.00429783	0.0174273	95.8974	3.51066	0.355048	0.236861	19.7828	3.74752	96.2525	0.59191	99.4081
EIO.MW17.47	07	B	0	0	0.000186931	0.000390945	9.00647e-05	0	0	5.35735e-05	0.0037828	0.00104144	0.000586393	0.0170255	0.0172386	0.000586393	9.00647e-05	5.35735e-05	0.00496906	0.0179686	95.9372	3.26343	0.501234	0.298151	21.6633	3.56158	96.4384	0.799385	99.2006
EIO.MW17.47	08	A	0	0	0.000234068	0.000246162	5.91586e-05	0	0	0	0.00128428	0.000842391	0.000411801	0.0151763	0.0154431	0.000411801	5.91586e-05	0	0.00224381	0.0159141	97.0406	2.58765	0.371737	0	12.3572	2.58765	97.4123	0.371737	99.6283
EIO.MW17.47	08	B	0	0	0.000164433	0.000120425	5.52245e-05	0	0	0	0.00126076	0.000738535	0.000352615	0.0125144	0.0127018	0.000352615	5.52245e-05	0	0.002102	0.0131097	96.889	2.68974	0.42125	0	13.8183	2.68974	97.3103	0.42125	99.5787
EIO.MW17.47	09	A	0	0	0.000268897	0.000628247	8.19856e-05	0	0	6.47975e-05	0.00219159	0.000601731	0.00082097	0.0152286	0.0155352	0.00082097	8.19856e-05	6.47975e-05	0.00287699	0.0165029	94.1359	4.9747	0.496795	0.392643	14.8452	5.36734	94.6327	0.889437	99.1106
EIO.MW17.47	09	B	0	0	0.000419939	0.00111778	5.7374e-05	0	0	7.53742e-05	0.000988682	0.000613413	0.000883288	0.014175	0.0146537	0.000883288	5.7374e-05	7.53742e-05	0.0016874	0.0156697	93.5159	5.6369	0.366145	0.481017	9.72164	6.11792	93.8821	0.847162	99.1528
EIO.MW17.47	10	A	0	0	0	0.000136789	0.00462099	0	0	0.00921903	0.0018632	0.000215822	0.00048568	0.00034077	0.00034077	0.00048568	0.00462099	0.00921903	0.00210904	0.0146665	2.32346	3.3115	31.5072	62.8579	12.5721	66.1694	33.8306	94.365	5.63496
EIO.MW17.47	10	B	0	0	0	0.000195293	0.00432041	0	0	0.00879733	0.00138328	0.000190633	0.000481991	0.00030751	0.00030751	0.000481991	0.00432041	0.00879733	0.00160042	0.0139072	2.21115	3.46575	31.0659	63.2572	10.3202	66.723	33.277	94.3231	5.67691
EIO.MW17.47	11	A	0	0.000222443	0	0.000232282	0.0332872	0	0	0.000665278	0.00326049	0.000769396	0	0.00158874	0.00158874	0	0.0335408	0.000665278	0.00413688	0.0357948	4.43846	0	93.7029	1.85859	10.3599	1.85859	98.1414	95.5615	4.43846
EIO.MW17.47	11	B	0	0.000194647	0	0.000224484	0.0219934	0	0	0.000443461	0.000636302	0.000612892	0	0.000904555	0.000904555	0	0.0222152	0.000443461	0.00133442	0.0235633	3.83884	0	94.2792	1.882	5.35963	1.882	98.118	96.1612	3.83884
EIO.MW15.A	01	A	0	0	0.00253954	0	0.00156471	0	0	0	0.0508342	0.00160135	0.00996831	0.605053	0.607947	0.00996831	0.00156471	0	0.0526583	0.61948	98.1383	1.60914	0.252584	0	7.83444	1.60914	98.3909	0.252584	99.7474
EIO.MW15.A	01	B	0	0	0.00122252	0	0.000660916	0	0	0	0.00025166	0.000545169	0.00403808	0.211663	0.213057	0.00403808	0.000660916	0	0.000872641	0.217756	97.8421	1.8544	0.303512	0	0.399143	1.8544	98.1456	0.303512	99.6965
EIO.MW15.A	02	A	0	0	0	0	5.42568e-05	0	0	0	6.7666e-05	0	0.000328605	0.0174748	0.0174748	0.000328605	5.42568e-05	0	6.7666e-05	0.0178577	97.856	1.84013	0.303829	0	0.377488	1.84013	98.1599	0.303829	99.6962
EIO.MW15.A	02	B	0	0	0	0	8.16185e-05	0	0	0	0.000172915	0	0.000535641	0.0288262	0.0288262	0.000535641	8.16185e-05	0	0.000172915	0.0294434	97.9036	1.81922	0.277204	0	0.583849	1.81922	98.1808	0.277204	99.7228
EIO.MW15.A	03	A	0	0	0.000129738	0	5.82062e-05	0	0	0	2.54269e-05	0	0.000268861	0.0181759	0.0183238	0.000268861	5.82062e-05	0	2.54269e-05	0.0186509	98.2464	1.44155	0.312083	0	0.136145	1.44155	98.5585	0.312083	99.6879
EIO.MW15.A	03	B	0	0	0.000176283	0	7.56307e-05	0	0	0	4.35818e-05	0	0.000366849	0.0281117	0.0283127	0.000366849	7.56307e-05	0	4.35818e-05	0.0287552	98.4612	1.27577	0.263016	0	0.151332	1.27577	98.7242	0.263016	99.737
EIO.MW15.A	04	A	0	0	0.000467945	0	0.000126257	0	0	0	0.000149324	0.000179215	0.000748672	0.0313763	0.0319098	0.000748672	0.000126257	0	0.000353461	0.0327847	97.3313	2.2836	0.385108	0	1.06663	2.2836	97.7164	0.385108	99.6149
EIO.MW15.A	04	B	0	0	0.00035818	0	8.86656e-05	0	0	0	0.00013173	0.000145192	0.000634805	0.0272182	0.0276265	0.000634805	8.86656e-05	0	0.000297112	0.02835	97.4481	2.23917	0.312753	0	1.03714	2.23917	97.7608	0.312753	99.6872
EIO.MW15.A	06	A	0	0	0.000194812	0	5.83984e-05	0	0	0	0	9.42595e-05	0.000384645	0.0168756	0.0170977	0.000384645	5.83984e-05	0	0.000107367	0.0175408	97.4742	2.19287	0.33293	0	0.608378	2.19287	97.8071	0.33293	99.6671
EIO.MW15.A	06	B	0	0	0.000175256	0	6.0256e-05	0	0	0	0	7.67021e-05	0.000430979	0.0139292	0.014129	0.000430979	6.0256e-05	0	8.73684e-05	0.0146202	96.64	2.94783	0.412142	0	0.594037	2.94783	97.0522	0.412142	99.5879
EIO.MW15.A	07	A	0	0	0.000859437	0	0.000634414	0	0	0	0.000313868	0.00090329	0.00344239	0.20218	0.203159	0.00344239	0.000634414	0	0.00134277	0.207236	98.0328	1.6611	0.306131	0	0.643771	1.6611	98.3389	0.306131	99.6939
EIO.MW15.A	07	B	0	0	0.000922178	0	0.00066895	0	0	0	0.00024512	0.000846861	0.00366584	0.231263	0.232315	0.00366584	0.00066895	0	0.00120975	0.236649	98.1683	1.54906	0.282676	0	0.508598	1.54906	98.4509	0.282676	99.7173
EIO.MW15.A	08	A	0	0	0.000186216	0	6.49186e-05	0	0	0	2.60694e-05	0	0.000389316	0.0268533	0.0270656	0.000389316	6.49186e-05	0	2.60694e-05	0.0275198	98.3494	1.41468	0.235898	0	0.09464	1.41468	98.5853	0.235898	99.7641
EIO.MW15.A	08	B	0	0	0.00013899	0	5.16831e-05	0	0	0	8.90771e-05	0	0.000311924	0.0194164	0.0195748	0.000311924	5.16831e-05	0	8.90771e-05	0.0199384	98.1763	1.56444	0.259214	0	0.444774	1.56444	98.4356	0.259214	99.7408
EIO.MW15.B	01	A	0	0	0	0	0	0	0	9.15279e-05	0	0	0.0224911	0.015851	0.015851	0.0224911	0	9.15279e-05	0	0.0384337	41.2425	58.5193	0	0.238145	0	58.7575	41.2425	0.238145	99.7619
EIO.MW15.B	01	B	0	0	0	0	0	0	0	7.67636e-05	0	0	0.0150569	0.00900047	0.00900047	0.0150569	0	7.67636e-05	0	0.0241341	37.2936	62.3884	0	0.318071	0	62.7064	37.2936	0.318071	99.6819
EIO.MW15.B	02	A	0	0	0	0	0	0	0	0.000185362	0	0	0.0483082	0.0072864	0.0072864	0.0483082	0	0.000185362	0	0.0557799	13.0628	86.6049	0	0.33231	0	86.9372	13.0628	0.33231	99.6677
EIO.MW15.B	02	B	0	0	0	0	0	0	0	0.000145398	0	0	0.0326727	0.00379934	0.00379934	0.0326727	0	0.000145398	0	0.0366175	10.3758	89.2272	0	0.397072	0	89.6242	10.3758	0.397072	99.6029
EIO.MW15.B	03	A	0.000196232	0	7.02075e-05	0	8.45334e-05	0.000276128	0	0.0003029	8.60149e-05	0.000118963	0.0710341	0.0200318	0.0201118	0.0713527	8.45334e-05	0.000529276	0.000221522	0.0920783	21.8421	77.4913	0.091806	0.574811	0.240002	78.0661	21.9339	0.666617	99.3334
EIO.MW15.B	03	B	0.000193171	0	0.000135421	0	0.000119881	0.000297155	0	0.000371547	9.8123e-05	0.000130588	0.0649797	0.0180886	0.018243	0.0653225	0.000119881	0.000594393	0.000246871	0.0842798	21.6458	77.5067	0.142242	0.705262	0.292063	78.212	21.788	0.847504	99.1525
EIO.MW15.B	04	A	0	0	0	0	0.000116927	0.000299838	0	0.000442099	0.000411288	0.000164826	0.0938773	0.0289752	0.0289752	0.0942232	0.000116927	0.000442099	0.000599035	0.123757	23.4129	76.1354	0.0944804	0.35723	0.481708	76.4926	23.5074	0.451711	99.5483
EIO.MW15.B	04	B	0	0	0	0	0.000138245	0.000306179	0	0.000350923	0.000135916	0.000140428	0.077121	0.0231018	0.0231018	0.0774743	0.000138245	0.000350923	0.000295872	0.101065	22.8583	76.6577	0.136788	0.347224	0.291899	77.0049	22.9951	0.484012	99.516
EIO.MW15.B	05	A	0	0	0	0	5.78104e-05	0.000248461	0	0.000182098	5.46161e-05	0	0.0314812	0.0105931	0.0105931	0.0317678	5.78104e-05	0.000182098	5.46161e-05	0.0426008	24.866	74.5708	0.135703	0.427452	0.12804	74.9983	25.0017	0.563155	99.4368
EIO.MW15.B	05	B	0	0	0	0	4.17625e-05	0.000154292	0	0.000173255	5.43486e-05	0	0.0275682	0.00894277	0.00894277	0.0277462	4.17625e-05	0.000173255	5.43486e-05	0.0369039	24.2325	75.1848	0.113165	0.469475	0.147054	75.6543	24.3457	0.58264	99.4174
EIO.MW15.B	06	A	0	0	0	0	4.42957e-05	0.000249269	0	0.000201989	3.71896e-05	0	0.0246416	0.00435155	0.00435155	0.0249292	4.42957e-05	0.000201989	3.71896e-05	0.029527	14.7375	84.4284	0.150018	0.684081	0.125793	85.1125	14.8875	0.834099	99.1659
EIO.MW15.B	06	B	0	0	0	0	5.31336e-05	0.000269974	0	0.000261527	0.000220501	0	0.0433071	0.0101793	0.0101793	0.0436185	5.31336e-05	0.000261527	0.000220501	0.0541125	18.8113	80.6072	0.0981911	0.483302	0.405833	81.0905	18.9095	0.581493	99.4185
EIO.MW15.B	07	A	0	0	0.000366793	0	0.000529232	0.00149155	0	0.00216581	0.00178659	0	0.51807	0.148656	0.149074	0.519791	0.000529232	0.00216581	0.00178659	0.67156	22.1982	77.4005	0.0788063	0.322504	0.265329	77.723	22.277	0.40131	99.5987
EIO.MW15.B	07	B	0	0	0.000265888	0	0.000421085	0.00133719	0	0.0017725	0.00149683	0	0.427331	0.125586	0.12589	0.428873	0.000421085	0.0017725	0.00149683	0.556957	22.6031	77.003	0.0756046	0.318247	0.268032	77.3213	22.6787	0.393852	99.6061
EIO.MW15.B	08	A	0	0	0	0	5.53411e-05	0.000318482	0	0.000280859	0	0	0.048232	0.00424803	0.00424803	0.0485994	5.53411e-05	0.000280859	0	0.0531837	7.98748	91.3804	0.104057	0.528092	0	91.9085	8.09154	0.632149	99.3679
EIO.MW15.B	08	B	0	0	0	0	6.27275e-05	0.00030241	0	0.000276303	0	0	0.0429379	0.00362614	0.00362614	0.0432868	6.27275e-05	0.000276303	0	0.0472519	7.67406	91.6084	0.132751	0.584744	0	92.1932	7.80682	0.717495	99.2825
EIO.MW15.B	09	A	0	0	0	0	5.21373e-05	0	0	0.000187428	0.000151058	0	0.0483874	0.0153771	0.0153771	0.0483874	5.21373e-05	0.000187428	0.000151058	0.0640041	24.0252	75.6005	0.0814594	0.292837	0.235457	75.8933	24.1067	0.374297	99.6257
EIO.MW15.B	09	B	0	0	0	0	4.11101e-05	0	0	0.000154373	0.000106365	0	0.0426644	0.0109336	0.0109336	0.0426644	4.11101e-05	0.000154373	0.000106365	0.0537935	20.3251	79.3115	0.0764221	0.286974	0.197339	79.5985	20.4015	0.363396	99.6366
EIO.MW15.B	10	A	0	0	0	0	6.19737e-05	0	0	0.000297014	0.00204844	0	0.0770269	0.0198914	0.0198914	0.0770269	6.19737e-05	0.000297014	0.00204844	0.0972773	20.4482	79.1828	0.0637082	0.305327	2.06234	79.4881	20.5119	0.369035	99.631
EIO.MW15.B	10	B	0	0	0	0	5.2497e-05	0	0	0.000273011	0.00123713	0	0.0701852	0.0167521	0.0167521	0.0701852	5.2497e-05	0.000273011	0.00123713	0.0872629	19.1973	80.4297	0.0601596	0.31286	1.39789	80.7425	19.2575	0.37302	99.627
EIO.MW15.B	11	A	0	0	0	0	9.07223e-05	0.000303827	0	0.00040155	0.00039182	0	0.0913893	0.0196899	0.0196899	0.0917398	9.07223e-05	0.00040155	0.00039182	0.111922	17.5925	81.9677	0.0810585	0.358777	0.348862	82.3264	17.6736	0.439835	99.5602
EIO.MW15.B	11	B	0	0	0	0	9.49034e-05	0.000228153	0	0.000321705	0.000324151	0	0.0727996	0.0171657	0.0171657	0.0730628	9.49034e-05	0.000321705	0.000324151	0.0906452	18.9373	80.6031	0.104698	0.354906	0.35633	80.958	19.042	0.459604	99.5404
EIO.MW15.C	02	A	0	0	0	0	5.27199e-05	0	0	0	0	0	0.00242085	0.0178696	0.0178696	0.00242085	5.27199e-05	0	0	0.0203432	87.8408	11.9	0.259152	0	0	11.9	88.1	0.259152	99.7408
EIO.MW15.C	02	B	0	0	0	0	2.86203e-05	0	0	0	0	0	0.00197219	0.0151359	0.0151359	0.00197219	2.86203e-05	0	0	0.0171367	88.3244	11.5086	0.167012	0	0	11.5086	88.4914	0.167012	99.833
EIO.MW15.C	04	A	0	0	0	0	0	0	0	0	0	0	0.00243711	0.0134421	0.0134421	0.00243711	0	0	0	0.0158792	84.6522	15.3478	0	0	0	15.3478	84.6522	0	100
EIO.MW15.C	04	B	0	0	0	0	0	0	0	0	0	0	0.00236514	0.01393	0.01393	0.00236514	0	0	0	0.0162952	85.4857	14.5143	0	0	0	14.5143	85.4857	0	100
EIO.MW15.C	07	A	0	0	0	0	4.69311e-05	0	0	0	0.000775686	8.87968e-05	0.00476053	0.0185418	0.0185418	0.00476053	4.69311e-05	0	0.000876831	0.0233493	79.4107	20.3883	0.200996	0	3.61936	20.3883	79.6117	0.200996	99.799
EIO.MW15.C	07	B	0	0	0	0	5.64617e-05	0	0	0	0.00131244	0.000100617	0.00536671	0.0206049	0.0206049	0.00536671	5.64617e-05	0	0.00142705	0.0260281	79.1641	20.619	0.216926	0	5.19775	20.619	79.381	0.216926	99.7831
EIO.MW15.C	08	A	0	0	0	0	8.97881e-05	0	0	3.89742e-05	6.18671e-05	0	0.00423375	0.0179429	0.0179429	0.00423375	8.97881e-05	3.89742e-05	6.18671e-05	0.0223054	80.4419	18.9808	0.402539	0.17473	0.276597	19.1556	80.8444	0.577269	99.4227
EIO.MW15.C	08	B	0	0	0	0	5.99977e-05	0	0	3.26241e-05	7.55522e-05	0	0.00449991	0.018713	0.018713	0.00449991	5.99977e-05	3.26241e-05	7.55522e-05	0.0233055	80.2942	19.3084	0.25744	0.139984	0.323134	19.4484	80.5516	0.397424	99.6026
EIO.MW15.C	10	A	0	0	0.000109556	0	0.000154504	0	0	7.49564e-05	0.000329818	8.53568e-05	0.00890308	0.0458037	0.0459286	0.00890308	0.000154504	7.49564e-05	0.000427044	0.0550611	83.4138	16.1695	0.280605	0.136133	0.769614	16.3056	83.6944	0.416738	99.5833
EIO.MW15.C	10	B	0	0	0.000117303	0	0.000166322	0	0	7.37751e-05	0.000131313	9.94112e-05	0.00889835	0.0434382	0.043572	0.00889835	0.000166322	7.37751e-05	0.000244548	0.0527104	82.6629	16.8816	0.315539	0.139963	0.461804	17.0215	82.9785	0.455502	99.5445
EIO.MW15.C	11	A	0	0	0	0	4.42638e-05	0	0	0	0.000180765	0	0.00307494	0.0187451	0.0187451	0.00307494	4.42638e-05	0	0.000180765	0.0218643	85.7338	14.0637	0.202448	0	0.819979	14.0637	85.9363	0.202448	99.7976
EIO.MW15.C	11	B	0	0	0	0	4.90971e-05	0	0	0	0.000136344	0	0.0036213	0.0221265	0.0221265	0.0036213	4.90971e-05	0	0.000136344	0.0257969	85.7719	14.0377	0.190322	0	0.52575	14.0377	85.9623	0.190322	99.8097
EIO.MW15.D	02	A	0	0	0.0026425	0	0.00134317	0	0	0	0.000385051	0.000899338	0.00474254	0.464489	0.467501	0.00474254	0.00134317	0	0.00140945	0.473587	98.715	1.00141	0.283617	0	0.296729	1.00141	98.9986	0.283617	99.7164
EIO.MW15.D	02	B	0	0	0.00133006	0	0.000919247	0	0	0	0.000243307	0.000571887	0.00308521	0.29303	0.294546	0.00308521	0.000919247	0	0.000894722	0.298551	98.6587	1.03339	0.307903	0	0.298793	1.03339	98.9666	0.307903	99.6921
EIO.MW15.D	03	A	0	0	5.72984e-05	7.27711e-05	8.03643e-05	0	0	0	0.00048086	0.000118349	0.00179844	0.0239191	0.0239844	0.00179844	8.03643e-05	0	0.000615667	0.0258632	92.7356	6.95367	0.310728	0	2.32512	6.95367	93.0463	0.310728	99.6893
EIO.MW15.D	03	B	0	0	6.17205e-05	8.43987e-05	8.32859e-05	0	0	0	0.000273914	0.000133506	0.00199201	0.0269835	0.0270539	0.00199201	8.32859e-05	0	0.000425985	0.0291292	92.8755	6.83856	0.285919	0	1.44132	6.83856	93.1614	0.285919	99.7141
EIO.MW15.D	05	A	0	0	0.000388859	6.46501e-05	0.000256668	0	0	4.48482e-05	0.000126825	0.000232708	0.00185368	0.0581638	0.058607	0.00185368	0.000256668	4.48482e-05	0.000391893	0.0607622	96.4531	3.05071	0.422414	0.0738093	0.640828	3.12452	96.8755	0.496224	99.5038
EIO.MW15.D	05	B	0	0	0.000506302	8.13365e-05	0.000330145	0	0	5.40139e-05	0.000168146	0.000316757	0.0021895	0.0755478	0.076125	0.0021895	0.000330145	5.40139e-05	0.000528952	0.0786986	96.7297	2.78213	0.419506	0.0686339	0.667636	2.85077	97.1492	0.48814	99.5119
EIO.MW15.D	06	A	0	0	0	0	0.0181518	0	0	0.000598441	0.00253132	0.000247097	0.00103985	0.015812	0.015812	0.00103985	0.0181518	0.000598441	0.00281278	0.0356021	44.4131	2.92077	50.9852	1.68092	7.32211	4.60169	95.3983	52.6661	47.3339
EIO.MW15.D	06	B	0	0	0	0	0.0124003	0	0	0.000401794	0.00113801	0.000165176	0.000465271	0.010716	0.010716	0.000465271	0.0124003	0.000401794	0.00132615	0.0239834	44.681	1.93997	51.7037	1.6753	5.23973	3.61527	96.3847	53.379	46.621
EIO.MW15.D	08	A	0	0	0.00232963	0	0.00128372	0	0	0.00015051	0.00510357	0.00070508	0.0122451	0.362215	0.36487	0.0122451	0.00128372	0.00015051	0.0059067	0.37855	96.3864	3.23474	0.339116	0.0397597	1.53638	3.2745	96.7255	0.378876	99.6211
EIO.MW15.D	08	B	0	0	0.00149278	0	0.00111965	0	0	0.000140532	0.00115826	0.000581711	0.00978258	0.268191	0.269893	0.00978258	0.00111965	0.000140532	0.00182087	0.280936	96.0693	3.48214	0.398544	0.0500228	0.64397	3.53217	96.4678	0.448566	99.5514
EIO.MW15.D	11	A	0	0	0.000388774	0	0.00020306	0	0	3.8081e-05	2.82192e-05	0.000122058	0.000881442	0.0534787	0.0539218	0.000881442	0.00020306	3.8081e-05	0.00016725	0.0550444	97.9606	1.60133	0.368902	0.0691823	0.302926	1.67051	98.3295	0.438084	99.5619
EIO.MW15.D	11	B	0	0	0.000377732	0	0.000218205	0	0	3.60089e-05	2.5416e-05	0.000160759	0.000938837	0.0539331	0.0543636	0.000938837	0.000218205	3.60089e-05	0.000208531	0.0555567	97.8526	1.68987	0.392762	0.0648146	0.373944	1.75469	98.2453	0.457576	99.5424
EIO.MW15.D	12	A	0	0	0.000111955	0.000101151	0.000124284	0	0	0	0.000140474	0.000114608	0.000656614	0.0173184	0.017446	0.000656614	0.000124284	0	0.00027102	0.0182269	95.7157	3.60244	0.681872	0	1.46514	3.60244	96.3976	0.681872	99.3181
EIO.MW15.D	12	B	0	0	0.000154879	9.45865e-05	9.61545e-05	0	0	0	9.493e-05	6.12048e-05	0.000786095	0.0222638	0.0224403	0.000786095	9.61545e-05	0	0.000164646	0.0233226	96.2172	3.37053	0.412281	0	0.701002	3.37053	96.6295	0.412281	99.5877
EIO.MW15.D	13	A	0	0.000149597	0.000134313	0	0.0201563	0	0	0.000433134	3.5824e-05	0.000110486	0.000780447	0.0124365	0.0125896	0.000780447	0.0203269	0.000433134	0.000161674	0.03413	36.8871	2.28669	59.5571	1.26907	0.471467	3.55576	96.4442	60.8262	39.1738
EIO.MW15.D	13	B	0	0.000151601	0.000151222	0	0.0236022	0	0	0.000475513	4.56482e-05	0.00016665	0.000867997	0.0146501	0.0148225	0.000867997	0.0237751	0.000475513	0.000235473	0.039941	37.1109	2.17319	59.5254	1.19054	0.586095	3.36373	96.6363	60.7159	39.2841
EIO.MW17.21	03	A	0	0	0	0	0.00129242	0	0	0.00780054	0.000687816	0	0.0140168	0.00136335	0.00136335	0.0140168	0.00129242	0.00780054	0.000687816	0.0244731	5.5708	57.2743	5.28097	31.8739	2.73366	89.1482	10.8518	37.1549	62.8451
EIO.MW17.21	03	B	0	0	0	0	0.00177951	0	0	0.0113007	0.00110411	0	0.0198697	0.00199374	0.00199374	0.0198697	0.00177951	0.0113007	0.00110411	0.0349437	5.70557	56.8621	5.0925	32.3398	3.0629	89.2019	10.7981	37.4323	62.5677
EIO.MW17.21	04	A	0	0	0	0	0.00208808	0	0	0.0162002	0.00543172	0.000112797	0.00134292	0.000149703	0.000149703	0.00134292	0.00208808	0.0162002	0.0055602	0.0197809	0.756807	6.78898	10.5561	81.8982	21.9414	88.6871	11.3129	92.4542	7.54579
EIO.MW17.21	04	B	0	0	0	0	0.00185659	0	0	0.014158	0.00452081	9.91265e-05	0.00109674	0.000135339	0.000135339	0.00109674	0.00185659	0.014158	0.00463372	0.0172466	0.78473	6.35918	10.7649	82.0912	21.1775	88.4503	11.5497	92.8561	7.14391
EIO.MW17.21	09	A	0	0	0	0	0.00292917	0	0	0.0111216	0.000822957	0	0.00811553	0.00134492	0.00134492	0.00811553	0.00292917	0.0111216	0.000822957	0.0235112	5.72036	34.5177	12.4586	47.3033	3.3819	81.821	18.179	59.7619	40.2381
EIO.MW17.21	09	B	0	0	0	0	0.00366135	0	0	0.0138704	0.00111816	0	0.0104085	0.00176488	0.00176488	0.0104085	0.00366135	0.0138704	0.00111816	0.0297051	5.94133	35.0395	12.3256	46.6935	3.62764	81.733	18.267	59.0192	40.9808
EIO.MW17.21	10	A	0	0	0	0	0.000821217	0	0	0.00912755	0.00161399	0	0.000679713	0	0	0.000679713	0.000821217	0.00912755	0.00161399	0.0106285	0	6.3952	7.72657	85.8782	13.1836	92.2734	7.72657	93.6048	6.3952
EIO.MW17.21	10	B	0	0	0	0	0.00071189	0	0	0.00781879	0.00128258	0	0.00058187	0	0	0.00058187	0.00071189	0.00781879	0.00128258	0.00911255	0	6.38537	7.8122	85.8024	12.3383	92.1878	7.8122	93.6146	6.38537
EIO.MW17.21	11	A	0	0	0	0	0.00414312	0	0	0.0148884	0.000298572	0	0.00105689	0.000283828	0.000283828	0.00105689	0.00414312	0.0148884	0.000298572	0.0203723	1.39321	5.18789	20.337	73.0819	1.44441	78.2697	21.7303	93.4189	6.5811
EIO.MW17.21	11	B	0	0	0	0	0.00479115	0	0	0.0181973	0.000539127	0	0.001276	0.000273348	0.000273348	0.001276	0.00479115	0.0181973	0.000539127	0.0245378	1.11398	5.20013	19.5256	74.1603	2.14989	79.3605	20.6395	93.6859	6.31411
EIO.MW15.F	03	A	0	0	0	0	7.33878e-05	0	0	0	0.000451695	0	0.000218904	0.0190253	0.0190253	0.000218904	7.33878e-05	0	0.000451695	0.0193176	98.4869	1.13318	0.379901	0	2.28483	1.13318	98.8668	0.379901	99.6201
EIO.MW15.F	03	B	0	0	0	0	5.79989e-05	0	0	0	0.000782474	0	0.000244162	0.0211393	0.0211393	0.000244162	5.79989e-05	0	0.000782474	0.0214414	98.5908	1.13874	0.270499	0	3.52087	1.13874	98.8613	0.270499	99.7295
EIO.MW15.F	04	A	0	0	0	0	7.20533e-05	0	0	0	0.000290739	0	0.000203943	0.0250396	0.0250396	0.000203943	7.20533e-05	0	0.000290739	0.0253156	98.9098	0.805603	0.284621	0	1.13542	0.805603	99.1944	0.284621	99.7154
EIO.MW15.F	04	B	0	0	0	0	0.000103676	0	0	0	0.00036983	0	0.000198575	0.0266186	0.0266186	0.000198575	0.000103676	0	0.00036983	0.0269209	98.8773	0.737625	0.385113	0	1.35515	0.737625	99.2624	0.385113	99.6149
EIO.MW15.F	09	A	0	0	0	8.9147e-05	0.000117696	0	0	0	0.000832921	0	0.00035384	0.0347436	0.0347436	0.00035384	0.000117696	0	0.000832921	0.0352151	98.661	1.00479	0.33422	0	2.31059	1.00479	98.9952	0.33422	99.6658
EIO.MW15.F	09	B	0	0	0	8.26031e-05	0.000101701	0	0	0	0.000963974	0	0.000272433	0.0316776	0.0316776	0.000272433	0.000101701	0	0.000963974	0.0320517	98.8327	0.849978	0.317304	0	2.91975	0.849978	99.15	0.317304	99.6827
EIO.MW15.F	10	A	0	0	0	0	3.11268e-05	0	0	0	0.000216785	0	0.000216361	0.0200132	0.0200132	0.000216361	3.11268e-05	0	0.000216785	0.0202607	98.7785	1.06789	0.153632	0	1.05865	1.06789	98.9321	0.153632	99.8464
EIO.MW15.F	10	B	0	0	0	0	6.46167e-05	0	0	0	0.000219267	0	0.000261128	0.0215149	0.0215149	0.000261128	6.46167e-05	0	0.000219267	0.0218406	98.5085	1.19561	0.295856	0	0.993965	1.19561	98.8044	0.295856	99.7041
EIO.MW15.F	12	A	0	0	0	0.000105484	0.000119659	0	0	0	0.00162682	0	0.000514833	0.0380481	0.0380481	0.000514833	0.000119659	0	0.00162682	0.0386826	98.3597	1.33092	0.309335	0	4.03585	1.33092	98.6691	0.309335	99.6907
EIO.MW15.F	12	B	0	0	0	0.000121055	0.0001027	0	0	0	0.00215152	0	0.000576396	0.0398241	0.0398241	0.000576396	0.0001027	0	0.00215152	0.0405032	98.3234	1.42309	0.253559	0	5.04403	1.42309	98.5769	0.253559	99.7464
EIO.MW15.F	13	A	0	0	0	0	8.11863e-05	0	0	0	0.000164394	0	0.000161105	0.0250833	0.0250833	0.000161105	8.11863e-05	0	0.000164394	0.0253256	99.0433	0.636136	0.320571	0	0.644936	0.636136	99.3639	0.320571	99.6794
EIO.MW15.F	13	B	0	0	0	0	6.70917e-05	0	0	0	0.000180324	0	0.000105291	0.022195	0.022195	0.000105291	6.70917e-05	0	0.000180324	0.0223674	99.2293	0.470736	0.299953	0	0.799743	0.470736	99.5293	0.299953	99.7
EIO.MW15.G	04	A	0	0	0	0	0.0108166	0	0	0.00414645	0.000385301	0	0.00794444	0.0114881	0.0114881	0.00794444	0.0108166	0.00414645	0.000385301	0.0343956	33.4	23.0973	31.4475	12.0552	1.10779	35.1524	64.8476	43.5027	56.4973
EIO.MW15.G	04	B	0	0	0	0	0.0108329	0	0	0.00467718	0.000290758	0	0.00903759	0.012142	0.012142	0.00903759	0.0108329	0.00467718	0.000290758	0.0366896	33.0937	24.6325	29.5258	12.748	0.786248	37.3805	62.6195	42.2738	57.7262
EIO.MW15.G	05	A	0	0	0	0	8.0153e-05	0	0	7.87667e-05	0.000281743	0	0.0104291	0.0192279	0.0192279	0.0104291	8.0153e-05	7.87667e-05	0.000281743	0.0298159	64.4887	34.9783	0.268827	0.264177	0.936099	35.2424	64.7576	0.533004	99.467
EIO.MW15.G	05	B	0	0	0	0	6.84311e-05	0	0	6.17421e-05	5.71234e-05	0	0.00865128	0.0157729	0.0157729	0.00865128	6.84311e-05	6.17421e-05	5.71234e-05	0.0245544	64.2367	35.2332	0.278692	0.251451	0.232101	35.4846	64.5154	0.530143	99.4699
EIO.MW15.G	06	A	0	0	0	0	0.00337305	0	0	0.00537022	9.15532e-05	0	0.0110379	0.00419185	0.00419185	0.0110379	0.00337305	0.00537022	9.15532e-05	0.023973	17.4857	46.0429	14.0702	22.4012	0.380449	68.444	31.556	36.4714	63.5286
EIO.MW15.G	06	B	0	0	0	0	0.00368059	0	0	0.00588632	0.000117596	0	0.0118587	0.00454224	0.00454224	0.0118587	0.00368059	0.00588632	0.000117596	0.0259678	17.4918	45.6668	14.1737	22.6678	0.450811	68.3345	31.6655	36.8414	63.1586
EIO.MW15.G	07	A	0	0	0	0	4.05154e-05	0	0	0.000173081	0	0	0.0195521	0.0100256	0.0100256	0.0195521	4.05154e-05	0.000173081	0	0.0297913	33.6527	65.6303	0.135998	0.580978	0	66.2113	33.7887	0.716976	99.283
EIO.MW15.G	07	B	0	0	0	0	4.94707e-05	0	0	0.000143413	0	0	0.018078	0.00935381	0.00935381	0.018078	4.94707e-05	0.000143413	0	0.0276247	33.8604	65.4414	0.179082	0.519149	0	65.9606	34.0394	0.69823	99.3018
EIO.MW15.G	08	A	0	0	0	0	0.00780266	0	0	0.000702137	0.000104524	0	0.00264949	0.0158201	0.0158201	0.00264949	0.00780266	0.000702137	0.000104524	0.0269744	58.6486	9.82225	28.9262	2.60298	0.385997	12.4252	87.5748	31.5291	68.4709
EIO.MW15.G	08	B	0	0	0	0	0.00630035	0	0	0.00056596	2.55023e-05	0	0.00216486	0.0131317	0.0131317	0.00216486	0.00630035	0.00056596	2.55023e-05	0.0221628	59.2508	9.76796	28.4276	2.55364	0.114936	12.3216	87.6784	30.9812	69.0188
EIO.MW15.G	14	A	0	0	0	0	0.00504664	0	0	0.0014308	0	0	0.003564	0.00678974	0.00678974	0.003564	0.00504664	0.0014308	0	0.0168312	40.3403	21.175	29.9839	8.50087	0	29.6758	70.3242	38.4848	61.5152
EIO.MW15.G	14	B	0	0	0	0	0.0052712	0	0	0.00169245	0	0	0.00421474	0.00711803	0.00711803	0.00421474	0.0052712	0.00169245	0	0.0182964	38.904	23.0359	28.81	9.25015	0	32.286	67.714	38.0602	61.9398
EIO.MW15.I	02	A	0	0	0	0	0.0206214	0	0	0.000164333	0.000734113	0	0.000196316	0.0145474	0.0145474	0.000196316	0.0206214	0.000164333	0.000734113	0.0355294	40.9446	0.552544	58.0403	0.462527	2.02438	1.01507	98.9849	58.5028	41.4972
EIO.MW15.I	02	B	0	0	0	0	0.0203679	0	0	0.000143842	0.000715912	0	0.000203838	0.0150322	0.0150322	0.000203838	0.0203679	0.000143842	0.000715912	0.0357478	42.0506	0.57021	56.9768	0.402381	1.96335	0.972591	99.0274	57.3792	42.6208
EIO.MW15.I	06	A	0	0	0.000105052	0.000226838	0.000221452	0	0	0	0.00359454	0	0.00108487	0.0858489	0.0859686	0.00108487	0.000221452	0	0.00359454	0.087275	98.5032	1.24305	0.253741	0	3.95571	1.24305	98.7569	0.253741	99.7463
EIO.MW15.I	06	B	0	0	8.29173e-05	0.000187833	0.000169776	0	0	0	0.00241245	0	0.000832119	0.0658851	0.0659796	0.000832119	0.000169776	0	0.00241245	0.0669815	98.5042	1.24231	0.253467	0	3.47645	1.24231	98.7577	0.253467	99.7465
EIO.MW15.I	08	A	0	0	0.00028988	0.000417396	0.000433919	0	0	0	0.00932553	0	0.00165059	0.168074	0.168405	0.00165059	0.000433919	0	0.00932553	0.170489	98.7773	0.968146	0.254514	0	5.18618	0.968146	99.0319	0.254514	99.7455
EIO.MW15.I	08	B	0	0	0.000360563	0.00033638	0.000345947	0	0	0	0.0048764	0	0.00124955	0.136461	0.136872	0.00124955	0.000345947	0	0.0048764	0.138468	98.8478	0.902411	0.249839	0	3.40188	0.902411	99.0976	0.249839	99.7502
EIO.MW15.I	09	A	0	0	0.000157927	0.000214117	0.000226594	0	0	0	0.00104371	0.000145094	0.00160715	0.0863115	0.0864915	0.00160715	0.000226594	0	0.00120898	0.0883252	97.9239	1.81958	0.256545	0	1.3503	1.81958	98.1804	0.256545	99.7435
EIO.MW15.I	09	B	0	0	0.000134193	0.000222637	0.0002213	0	0	0	0.000683028	0.000142201	0.00156143	0.0850501	0.0852031	0.00156143	0.0002213	0	0.000845003	0.0869858	97.9505	1.79504	0.254409	0	0.962081	1.79504	98.205	0.254409	99.7456
EIO.MW15.I	12	A	0	0	0.000204829	0.000265856	0.000447767	0	0	0	0.0280015	0.000628476	0.00284349	0.177121	0.177354	0.00284349	0.000447767	0	0.0287173	0.180646	98.1781	1.57407	0.24787	0	13.7165	1.57407	98.4259	0.24787	99.7521
EIO.MW15.I	12	B	0	0	0.000176927	0.000408498	0.000445514	0	0	0	0.0229187	0.000627529	0.00274805	0.173669	0.173871	0.00274805	0.000445514	0	0.0236335	0.177064	98.1964	1.55201	0.251612	0	11.7757	1.55201	98.448	0.251612	99.7484
EIO.MW15.I	16	A	0	0	0.000202827	0.000325765	0.000345796	0	0	0	0.00964948	0.00156506	0.00330168	0.12767	0.127901	0.00330168	0.000345796	0	0.0114322	0.131548	97.2273	2.50986	0.262866	0	7.99562	2.50986	97.4901	0.262866	99.7371
EIO.MW15.I	16	B	0	0	0.000290624	0.00030076	0.000391703	0	0	0	0.0147108	0.00193283	0.00393974	0.153164	0.153496	0.00393974	0.000391703	0	0.0169124	0.157827	97.2556	2.49624	0.248185	0	9.67863	2.49624	97.5038	0.248185	99.7518
EIO.MW15.J	01	A	0	0	0	9.71203e-05	9.4901e-05	0	0	0	0.00102046	0	0.00104717	0.031089	0.031089	0.00104717	9.4901e-05	0	0.00102046	0.0322311	96.4566	3.24893	0.294439	0	3.06891	3.24893	96.7511	0.294439	99.7056
EIO.MW15.J	01	B	0	0	0	0.000108165	0.000115646	0	0	0	0.00109181	0	0.0013141	0.0372427	0.0372427	0.0013141	0.000115646	0	0.00109181	0.0386724	96.3029	3.39803	0.29904	0	2.7457	3.39803	96.602	0.29904	99.701
EIO.MW15.J	02	A	0	0.000109587	0	0	0.0184018	0	0	0.000280399	0.000139949	0	0	0.00127583	0.00127583	0	0.0185267	0.000280399	0.000139949	0.0200829	6.35281	0	92.251	1.39621	0.692031	1.39621	98.6038	93.6472	6.35281
EIO.MW15.J	02	B	0	0.000110067	0	0	0.0221615	0	0	0.000371219	0.000370198	0	0	0.00142563	0.00142563	0	0.0222869	0.000371219	0.000370198	0.0240838	5.91945	0	92.5392	1.54136	1.51385	1.54136	98.4586	94.0806	5.91945
EIO.MW15.J	06	A	0	0	0.000102267	8.7934e-05	0.000120952	0	0	0	4.4599e-05	0	0.00122749	0.0312985	0.0314151	0.00122749	0.000120952	0	4.4599e-05	0.0327635	95.8843	3.7465	0.369167	0	0.135939	3.7465	96.2535	0.369167	99.6308
EIO.MW15.J	06	B	0	0	0.000147564	9.04704e-05	0.000135881	0	0	0	3.23617e-05	0	0.00138753	0.0353628	0.035531	0.00138753	0.000135881	0	3.23617e-05	0.0370544	95.8887	3.74456	0.366706	0	0.0872593	3.74456	96.2554	0.366706	99.6333
EIO.MW15.J	08	A	0	0	0	0	0.01332	0	0	0.000392103	2.36013e-05	0	0.000608541	0.0108042	0.0108042	0.000608541	0.01332	0.000392103	2.36013e-05	0.0251249	43.0021	2.42206	53.0152	1.56061	0.0938476	3.98268	96.0173	54.5759	45.4241
EIO.MW15.J	08	B	0	0	0	0	0.0111888	0	0	0.000383506	9.14743e-05	0	0.000546434	0.00876877	0.00876877	0.000546434	0.0111888	0.000383506	9.14743e-05	0.0208875	41.981	2.61608	53.5669	1.83606	0.436028	4.45214	95.5479	55.403	44.597
EIO.MW15.J	09	A	0	0	7.86618e-05	0.000173779	0.000165553	0	0	0	0.00566337	7.14104e-05	0.00519264	0.051295	0.0513847	0.00519264	0.000165553	0	0.00574471	0.0567429	90.5571	9.15117	0.29176	0	9.19335	9.15117	90.8488	0.29176	99.7082
EIO.MW15.J	09	B	0	0	9.06761e-05	0.000125681	0.000147432	0	0	0	0.00248649	6.70001e-05	0.00434811	0.0464197	0.046523	0.00434811	0.000147432	0	0.00256281	0.0510186	91.1884	8.5226	0.288977	0	4.78302	8.5226	91.4774	0.288977	99.711
EIO.MW15.J	10	A	0	0.000146912	0	0	0.0252386	0	0	0.000977469	0.000160373	0.000110456	0.000580449	0.00815772	0.00815772	0.000580449	0.025406	0.000977469	0.000286189	0.0351217	23.227	1.65268	72.3372	2.78309	0.808263	4.43577	95.5642	75.1203	24.8797
EIO.MW15.J	10	B	0	0.000144252	0	0	0.0221316	0	0	0.000811677	8.32909e-05	0.000123971	0.000597046	0.0079018	0.0079018	0.000597046	0.0222961	0.000811677	0.000224501	0.0316066	25.0005	1.88899	70.5425	2.56806	0.705289	4.45706	95.5429	73.1105	26.8895
EIO.MW15.J	11	A	0	0.000127298	7.7954e-05	0	0.0304273	0	0	0.000334664	0.000244231	0	0.000542881	0.0188179	0.0189068	0.000542881	0.0305724	0.000334664	0.000244231	0.0503567	37.5457	1.07807	60.7116	0.664587	0.482661	1.74266	98.2573	61.3762	38.6238
EIO.MW15.J	11	B	0	0.000121895	7.40479e-05	0	0.0254865	0	0	0.000307665	0.000238708	0	0.000559267	0.0152392	0.0153236	0.000559267	0.0256255	0.000307665	0.000238708	0.041816	36.6453	1.33745	61.2815	0.73576	0.567614	2.07321	97.9268	62.0173	37.9827
EIO.MW15.J	13	A	0	0	0	0	0.0145679	0	0	0.000547428	0.0004806	0	0.000715154	0.0109075	0.0109075	0.000715154	0.0145679	0.000547428	0.0004806	0.026738	40.7942	2.67467	54.4838	2.04738	1.76571	4.72205	95.2779	56.5312	43.4688
EIO.MW15.J	13	B	0	0	0	0	0.0122345	0	0	0.000391736	8.40173e-05	0	0.000524731	0.00947192	0.00947192	0.000524731	0.0122345	0.000391736	8.40173e-05	0.0226229	41.8688	2.31947	54.0802	1.73159	0.370008	4.05106	95.9489	55.8117	44.1883
EIO.MW15.K	01	A	0	0	0.000166113	0	0.000187807	0	0	8.92939e-05	0.0012482	0.000225024	0.00357292	0.0553335	0.0555229	0.00357292	0.000187807	8.92939e-05	0.00150452	0.0593729	93.5155	6.01776	0.316317	0.150395	2.47139	6.16816	93.8318	0.466712	99.5333
EIO.MW15.K	01	B	0	0	0.000127587	0	0.000164003	0	0	5.83907e-05	0.00138322	0.000220797	0.0031594	0.0510604	0.0512058	0.0031594	0.000164003	5.83907e-05	0.00163472	0.0545876	93.8048	5.78775	0.300439	0.106967	2.9076	5.89472	94.1053	0.407406	99.5926
EIO.MW15.K	02	A	0	0	9.75986e-05	0.000162303	0.000160141	0	0	0	0.00425896	0.000133972	0.00439537	0.0547985	0.0549098	0.00439537	0.000160141	0	0.00441156	0.0594653	92.3392	7.39149	0.269302	0	6.90636	7.39149	92.6085	0.269302	99.7307
EIO.MW15.K	02	B	0	0	0.000100256	0.000134709	0.000140736	0	0	0	0.00219204	0.000149319	0.00318212	0.0445451	0.0446594	0.00318212	0.000140736	0	0.00236213	0.0479823	93.0748	6.63186	0.293307	0	4.69193	6.63186	93.3681	0.293307	99.7067
EIO.MW15.K	03	A	0	0	6.12733e-05	0	0.0155563	0	0	0.00115418	0.000114874	8.55609e-05	0.00149504	0.0106735	0.0107434	0.00149504	0.0155563	0.00115418	0.000212333	0.0289489	37.1115	5.16441	53.7371	3.98697	0.728135	9.15138	90.8486	57.7241	42.2759
EIO.MW15.K	03	B	0	0	7.80015e-05	0	0.00790405	0	0	0.000466011	5.64879e-05	7.33626e-05	0.000684989	0.00667507	0.00676399	0.000684989	0.00790405	0.000466011	0.000140052	0.015819	42.7585	4.33016	49.9654	2.94589	0.87757	7.27604	92.724	52.9113	47.0887
EIO.MW15.K	05	A	0	0.000222781	0.000107036	0	0.0497464	0	0	0.000823433	0.00178344	0.000330599	0.0010914	0.0207908	0.0209128	0.0010914	0.0500003	0.000823433	0.00216001	0.072828	28.7154	1.4986	68.6554	1.13065	2.88048	2.62926	97.3707	69.786	30.214
EIO.MW15.K	05	B	0	0.000264706	0.000113225	0	0.0625746	0	0	0.00101706	0.00307018	0.000417518	0.00127881	0.0271288	0.0272579	0.00127881	0.0628763	0.00101706	0.00354576	0.0924301	29.4903	1.38354	68.0258	1.10036	3.69443	2.4839	97.5161	69.1262	30.8738
EIO.MW15.K	06	A	0	0	8.49018e-05	0	0.000160151	0	0	0	0.000209899	0.000123417	0.0011964	0.0231809	0.0232777	0.0011964	0.000160151	0	0.000350479	0.0246342	94.4932	4.85664	0.650115	0	1.40277	4.85664	95.1434	0.650115	99.3499
EIO.MW15.K	06	B	0	0	9.19555e-05	0	0.000133594	0	0	0	0.000122502	0.000136954	0.00119336	0.022739	0.0228438	0.00119336	0.000133594	0	0.0002785	0.0241708	94.5101	4.93719	0.552709	0	1.1391	4.93719	95.0628	0.552709	99.4473
EIO.MW15.K	07	A	0	0	0.000143458	0	0.000170396	0	0	5.53927e-05	0.000435191	0.000221276	0.00227	0.0406234	0.0407869	0.00227	0.000170396	5.53927e-05	0.000687237	0.0432827	94.2338	5.24458	0.393681	0.127979	1.56297	5.37256	94.6274	0.52166	99.4783
EIO.MW15.K	07	B	0	0	0.000119109	0	0.000154994	0	0	5.93602e-05	0.000478999	0.000217325	0.00196897	0.0323545	0.0324903	0.00196897	0.000154994	5.93602e-05	0.000726545	0.0346736	93.7032	5.67858	0.447009	0.171197	2.05238	5.84978	94.1502	0.618206	99.3818
EIO.MW15.K	08	A	0	0	0.000142773	0	0.000147413	0	0	0	0.000965834	0.000173093	0.00394985	0.0451248	0.0452876	0.00394985	0.000147413	0	0.001163	0.0493848	91.7034	7.9981	0.298498	0	2.30079	7.9981	92.0019	0.298498	99.7015
EIO.MW15.K	08	B	0	0	0.000150379	0	0.00016331	0	0	0	0.00138841	0.000245043	0.00480525	0.0522122	0.0523836	0.00480525	0.00016331	0	0.00166753	0.0573522	91.3367	8.37851	0.28475	0	2.82538	8.37851	91.6215	0.28475	99.7152
EIO.MW15.K	09	A	0	0	0	0	3.89348e-05	0	0	0	0	0	0.000499207	0.0110929	0.0110929	0.000499207	3.89348e-05	0	0	0.011631	95.3732	4.29202	0.334749	0	0	4.29202	95.708	0.334749	99.6653
EIO.MW15.K	09	B	0	0	0	0	6.04278e-05	0	0	0	0	0	0.000593952	0.0138113	0.0138113	0.000593952	6.04278e-05	0	0	0.0144656	95.4763	4.10595	0.417733	0	0	4.10595	95.894	0.417733	99.5823
EIO.MW15.K	10	A	0	0	0	0	5.42975e-05	0	0	0	9.03468e-05	0	0.00121092	0.0150357	0.0150357	0.00121092	5.42975e-05	0	9.03468e-05	0.0163009	92.2383	7.42856	0.333095	0	0.55119	7.42856	92.5714	0.333095	99.6669
EIO.MW15.K	10	B	0	0	0	0	7.5533e-05	0	0	0	9.56089e-05	0	0.00149041	0.0170827	0.0170827	0.00149041	7.5533e-05	0	9.56089e-05	0.0186486	91.6029	7.99206	0.405033	0	0.510071	7.99206	92.0079	0.405033	99.595
EIO.MW15.L	08	A	0	0	0	0.000141981	8.21518e-05	0	0	0.00014339	0.00011802	0	0.0230164	0.0156546	0.0156546	0.0230164	8.21518e-05	0.00014339	0.00011802	0.0388965	40.2468	59.1734	0.211206	0.368645	0.302503	59.542	40.458	0.579851	99.4201
EIO.MW15.L	08	B	0	0	0	0.000189702	0.000150911	0	0	0.00017297	0.000132268	0	0.0293332	0.0201148	0.0201148	0.0293332	0.000150911	0.00017297	0.000132268	0.0497719	40.4139	58.9353	0.303206	0.347525	0.265043	59.2829	40.7171	0.650732	99.3493
EIO.MW15.L	09	A	0	0	0	0	0.00450427	0	0	0.00316647	6.89425e-05	0	0.00718729	0.00593644	0.00593644	0.00718729	0.00450427	0.00316647	6.89425e-05	0.0207945	28.5482	34.5635	21.6609	15.2274	0.330447	49.7909	50.2091	36.8884	63.1116
EIO.MW15.L	09	B	0	0	0	0	0.0049702	0	0	0.00340365	4.08816e-05	0	0.00763272	0.0062492	0.0062492	0.00763272	0.0049702	0.00340365	4.08816e-05	0.0222558	28.079	34.2955	22.3322	15.2933	0.183353	49.5888	50.4112	37.6255	62.3745
EIO.MW15.L	10	A	0	0	0.000100685	0.000436055	0.000156642	0	0	0.000100542	5.94113e-05	0	0.0103364	0.0155297	0.0156445	0.0103364	0.000156642	0.000100542	5.94113e-05	0.0262381	59.6252	39.3946	0.597002	0.383191	0.22592	39.7778	60.2222	0.980193	99.0198
EIO.MW15.L	10	B	0	0	0.000111886	0.000593267	0.000332414	0	0	8.1453e-05	7.4893e-05	0	0.0123585	0.0192406	0.0193681	0.0123585	0.000332414	8.1453e-05	7.4893e-05	0.0321405	60.2609	38.4514	1.03425	0.253428	0.232476	38.7049	61.2951	1.28768	98.7123
EIO.MW15.L	11	A	0	0	0	0	4.62284e-05	0	0	6.92532e-05	0.000140561	0	0.00979119	0.00917182	0.00917182	0.00979119	4.62284e-05	6.92532e-05	0.000140561	0.0190785	48.0741	51.3206	0.242306	0.362991	0.731365	51.6836	48.3164	0.605297	99.3947
EIO.MW15.L	11	B	0	0	0	0	2.78022e-05	0	0	8.57855e-05	0.000209628	0	0.0121781	0.0117386	0.0117386	0.0121781	2.78022e-05	8.57855e-05	0.000209628	0.0240303	48.8491	50.6782	0.115697	0.356989	0.864805	51.0352	48.9648	0.472686	99.5273
EIO.MW15.L	13	A	0	0	0	0.000245902	0.000140008	0	0	0.000123859	6.76041e-05	0	0.0223913	0.0180523	0.0180523	0.0223913	0.000140008	0.000123859	6.76041e-05	0.0407074	44.3464	55.0054	0.343937	0.304267	0.165798	55.3097	44.6903	0.648204	99.3518
EIO.MW15.L	13	B	0	0	0	0.000204417	0.000163622	0	0	0.000156605	0.000237024	0	0.0259884	0.0241545	0.0241545	0.0259884	0.000163622	0.000156605	0.000237024	0.0504631	47.8657	51.4998	0.324241	0.310336	0.467501	51.8101	48.1899	0.634577	99.3654
EIO.MW15.M	01	A	0	0	0	0	0.00983151	0	0	0.010404	0.000577601	0	0.00671939	0.00533887	0.00533887	0.00671939	0.00983151	0.010404	0.000577601	0.0322937	16.5322	20.8071	30.444	32.2167	1.75715	53.0238	46.9762	62.6607	37.3393
EIO.MW15.M	01	B	0	0	0	0	0.00960313	0	0	0.0102718	0.000521658	0	0.00669845	0.00527041	0.00527041	0.00669845	0.00960313	0.0102718	0.000521658	0.0318438	16.5508	21.0353	30.157	32.2569	1.61177	53.2922	46.7078	62.4138	37.5862
EIO.MW15.M	02	A	0	0	0	0	0.00940487	0	0	0.00968032	0.00036064	0	0.00652041	0.00590345	0.00590345	0.00652041	0.00940487	0.00968032	0.00036064	0.0315091	18.7357	20.6938	29.8481	30.7223	1.13161	51.4161	48.5839	60.5705	39.4295
EIO.MW15.M	02	B	0	0	0	0	0.0118047	0	0	0.0117374	0.000512269	0	0.00769868	0.00732477	0.00732477	0.00769868	0.0118047	0.0117374	0.000512269	0.0385656	18.993	19.9626	30.6095	30.435	1.31089	50.3975	49.6025	61.0444	38.9556
EIO.MW15.M	03	A	0	0	0	0.000112124	0.00815048	0	0	0.00455744	0.000772364	0	0.0111335	0.00622994	0.00622994	0.0111335	0.00815048	0.00455744	0.000772364	0.0300714	20.7172	37.0236	27.1038	15.1554	2.50412	52.179	47.821	42.2592	57.7408
EIO.MW15.M	03	B	0	0	0	0.000134189	0.010181	0	0	0.00589066	0.00173116	0	0.0136788	0.00767266	0.00767266	0.0136788	0.010181	0.00589066	0.00173116	0.0374231	20.5025	36.5518	27.205	15.7407	4.42138	52.2925	47.7075	42.9457	57.0543
EIO.MW15.M	04	A	0	0	0	0	0.00336347	0	0	0.00417874	0.000832414	0	0.00187336	0.00116143	0.00116143	0.00187336	0.00336347	0.00417874	0.000832414	0.010577	10.9807	17.7116	31.7999	39.5078	7.29585	57.2194	42.7806	71.3077	28.6923
EIO.MW15.M	04	B	0	0	0	0	0.00320568	0	0	0.00387222	0.000852892	0	0.00170094	0.00107954	0.00107954	0.00170094	0.00320568	0.00387222	0.000852892	0.00985839	10.9505	17.2538	32.5173	39.2784	7.96256	56.5322	43.4678	71.7957	28.2043
EIO.MW15.M	05	A	0	0	0	0	5.75358e-05	0	0	0.000101857	0.000382774	0	0.0170961	0.0136279	0.0136279	0.0170961	5.75358e-05	0.000101857	0.000382774	0.0308834	44.1269	55.357	0.1863	0.329812	1.22424	55.6868	44.3132	0.516112	99.4839
EIO.MW15.M	05	B	0	0	0	0	4.34693e-05	0	0	0.000101353	0.000602297	0	0.0186663	0.0167161	0.0167161	0.0186663	4.34693e-05	0.000101353	0.000602297	0.0355272	47.0516	52.5407	0.122355	0.285282	1.66705	52.826	47.174	0.407637	99.5924
EIO.MW15.M	07	A	0	0	0.000149987	0.000501548	0.000115059	0	0	4.16975e-05	0.000408308	0	0.00433025	0.0241284	0.0242994	0.00433025	0.000115059	4.16975e-05	0.000408308	0.0287864	84.4127	15.0427	0.399699	0.144852	1.39857	15.1876	84.8124	0.54455	99.4554
EIO.MW15.M	07	B	0	0	0.000155671	0.000441494	0.000185328	0	0	3.79586e-05	0.00058124	0	0.00438453	0.026084	0.0262615	0.00438453	0.000185328	3.79586e-05	0.00058124	0.0308693	85.0731	14.2035	0.600365	0.122966	1.84811	14.3265	85.6735	0.72333	99.2767
EIO.MW15.M	08	A	0	0	0	0	3.3551e-05	0	0	6.3366e-05	0.00278153	8.66258e-05	0.00781354	0.0088117	0.0088117	0.00781354	3.3551e-05	6.3366e-05	0.0028802	0.0167221	52.6948	46.7257	0.200638	0.378935	14.6931	47.1046	52.8954	0.579573	99.4204
EIO.MW15.M	08	B	0	0	0	0	4.47652e-05	0	0	6.38158e-05	0.00410635	9.3457e-05	0.00890338	0.0101085	0.0101085	0.00890338	4.47652e-05	6.38158e-05	0.00421281	0.0191204	52.8674	46.5648	0.234122	0.333757	18.055	46.8985	53.1015	0.567879	99.4321
EIO.MW15.O	01	A	0	0	0	0.000519925	0.00040624	0	0	0.000270865	0.0292991	0.000329409	0.0924288	0.22104	0.22104	0.0924288	0.00040624	0.000270865	0.0296743	0.314146	70.3622	29.4222	0.129316	0.0862225	8.63075	29.5085	70.4915	0.215538	99.7845
EIO.MW15.O	01	B	0	0	0	0.000118703	0.000113648	0	0	6.88447e-05	0.0070942	0.00010964	0.0212105	0.0454679	0.0454679	0.0212105	0.000113648	6.88447e-05	0.00721909	0.0668609	68.0038	31.7233	0.169977	0.102967	9.74499	31.8263	68.1737	0.272944	99.7271
EIO.MW15.O	07	A	0	0	0	0	9.3642e-05	0	0	0	0.00171856	6.55439e-05	0.00210425	0.0255908	0.0255908	0.00210425	9.3642e-05	0	0.00179322	0.0277886	92.0907	7.57234	0.336979	0	6.06189	7.57234	92.4277	0.336979	99.663
EIO.MW15.O	07	B	0	0	0	0	0.00012093	0	0	0	0.00118852	8.32114e-05	0.00246369	0.030812	0.030812	0.00246369	0.00012093	0	0.0012833	0.0333966	92.2608	7.37706	0.362103	0	3.70042	7.37706	92.6229	0.362103	99.6379
EIO.MW15.O	08	A	0	0	0.000116946	0.000132904	0.000166906	0	0	0	0	0	0.00217763	0.043829	0.0439623	0.00217763	0.000166906	0	0	0.0463069	94.937	4.7026	0.360436	0	0	4.7026	95.2974	0.360436	99.6396
EIO.MW15.O	08	B	0	0	0.000102883	0.000136994	0.000131497	0	0	0	0	0	0.00238485	0.0445415	0.0446588	0.00238485	0.000131497	0	0	0.0471752	94.666	5.0553	0.278742	0	0	5.0553	94.9447	0.278742	99.7213
EIO.MW15.O	14	A	0	0	8.24304e-05	0.000101232	0.000138239	0	0	0	0	0	0.000701858	0.0385032	0.0385972	0.000701858	0.000138239	0	0	0.0394373	97.8698	1.77968	0.350529	0	0	1.77968	98.2203	0.350529	99.6495
EIO.MW15.O	14	B	0	0	7.36854e-05	8.2807e-05	0.000104513	0	0	0	0	0	0.000625164	0.0345656	0.0346496	0.000625164	0.000104513	0	0	0.0353793	97.9376	1.76703	0.295407	0	0	1.76703	98.233	0.295407	99.7046
EIO.MW15.O	16	A	0	0	9.31351e-05	0.000120287	0.000134168	0	0	0	0	0	0.000994487	0.0457033	0.0458095	0.000994487	0.000134168	0	0	0.0469381	97.5954	2.11872	0.285839	0	0	2.11872	97.8813	0.285839	99.7142
EIO.MW15.O	16	B	0	0	8.07654e-05	0.00012334	0.000116339	0	0	0	0	0	0.000888678	0.0415369	0.041629	0.000888678	0.000116339	0	0	0.042634	97.6427	2.08444	0.272878	0	0	2.08444	97.9156	0.272878	99.7271
EIO.MW15.O	17	A	0	0	0	0.000117671	0.000141177	0	0	0	0	0	0.00216409	0.0422353	0.0422353	0.00216409	0.000141177	0	0	0.0445406	94.8244	4.85869	0.316962	0	0	4.85869	95.1413	0.316962	99.683
EIO.MW15.O	17	B	0	0	0	0.000114911	0.000108399	0	0	0	0	0	0.0022567	0.0416097	0.0416097	0.0022567	0.000108399	0	0	0.0439748	94.6217	5.13182	0.246504	0	0	5.13182	94.8682	0.246504	99.7535
EIO.MW15.P_2	05	A	0	0	0	0	0	0	0	4.60942e-05	9.26786e-05	0	0.0135803	0.00222695	0.00222695	0.0135803	0	4.60942e-05	9.26786e-05	0.0158533	14.0472	85.662	0	0.290754	0.581204	85.9528	14.0472	0.290754	99.7092
EIO.MW15.P_2	05	B	0	0	0	0	0	0	0	7.82608e-05	7.6537e-05	0	0.0151639	0.00257947	0.00257947	0.0151639	0	7.82608e-05	7.6537e-05	0.0178217	14.4738	85.0871	0	0.439133	0.427624	85.5262	14.4738	0.439133	99.5609
EIO.MW15.P_2	07	A	0	0	0	0	0	0	0	9.15912e-05	2.19328e-05	0	0.0180381	0.00294012	0.00294012	0.0180381	0	9.15912e-05	2.19328e-05	0.0210699	13.9542	85.6111	0	0.434702	0.103987	86.0458	13.9542	0.434702	99.5653
EIO.MW15.P_2	07	B	0	0	0	0	0	0	0	8.84384e-05	4.26245e-05	0	0.0167315	0.00273614	0.00273614	0.0167315	0	8.84384e-05	4.26245e-05	0.0195561	13.9912	85.5565	0	0.45223	0.217486	86.0088	13.9912	0.45223	99.5478
EIO.MW15.P_2	08	A	0	0	0	0	0	0	0	6.13224e-05	0	0	0.00855495	0.00339025	0.00339025	0.00855495	0	6.13224e-05	0	0.0120065	28.2367	71.2525	0	0.510743	0	71.7633	28.2367	0.510743	99.4893
EIO.MW15.P_2	08	B	0	0	0	0	0	0	0	3.9785e-05	0	0	0.00993593	0.00399034	0.00399034	0.00993593	0	3.9785e-05	0	0.0139661	28.5717	71.1434	0	0.284869	0	71.4283	28.5717	0.284869	99.7151
EIO.MW15.P_2	09	A	0	0	0	0	0	0	0	0	0	0	0.00688772	0.000968705	0.000968705	0.00688772	0	0	0	0.00785642	12.3301	87.6699	0	0	0	87.6699	12.3301	0	100
EIO.MW15.P_2	09	B	0	0	0	0	0	0	0	0	0	0	0.00692397	0.000991642	0.000991642	0.00692397	0	0	0	0.00791562	12.5277	87.4723	0	0	0	87.4723	12.5277	0	100
EIO.MW15.P_2	11	A	0	0	0	0	0	0	0	5.64687e-05	0	0	0.00581139	0.00221901	0.00221901	0.00581139	0	5.64687e-05	0	0.00808686	27.4396	71.8621	0	0.698277	0	72.5604	27.4396	0.698277	99.3017
EIO.MW15.P_2	11	B	0	0	0	0	0	0	0	5.73278e-05	0	0	0.00576982	0.00229416	0.00229416	0.00576982	0	5.73278e-05	0	0.0081213	28.2486	71.0455	0	0.705894	0	71.7514	28.2486	0.705894	99.2941
EIO.MW15.P_2	12	A	0	0	0	0	0	0	0	0.000101371	0.000126564	0	0.0233498	0.00310441	0.00310441	0.0233498	0	0.000101371	0.000126564	0.0265556	11.6902	87.928	0	0.381733	0.474339	88.3098	11.6902	0.381733	99.6183
EIO.MW15.P_2	12	B	0	0	0	0	0	0	0	0.000109725	0.0001335	0	0.0238843	0.00310614	0.00310614	0.0238843	0	0.000109725	0.0001335	0.0271002	11.4617	88.1334	0	0.404885	0.4902	88.5383	11.4617	0.404885	99.5951
EIO.MW15.Q	01	A	0	0	0.000211056	0.000323722	0.000309523	0	0	3.86976e-05	0.00934876	0.000167122	0.00811569	0.116784	0.117025	0.00811569	0.000309523	3.86976e-05	0.00953912	0.125488	93.2552	6.46728	0.246655	0.0308376	7.06457	6.49811	93.5019	0.277492	99.7225
EIO.MW15.Q	01	B	0	0	6.44744e-05	0.000279241	0.000277569	0	0	3.34105e-05	0.00708619	0.000133374	0.00624766	0.098368	0.0984415	0.00624766	0.000277569	3.34105e-05	0.00723811	0.105	93.7537	5.95015	0.264351	0.0318195	6.44888	5.98197	94.018	0.296171	99.7038
EIO.MW15.Q	04	A	0	0	0.000373024	0	0.000469986	0	0	6.6017e-05	0.0148962	0.000346365	0.00376232	0.186136	0.186561	0.00376232	0.000469986	6.6017e-05	0.0152907	0.19086	97.7479	1.97125	0.246247	0.0345893	7.41726	2.00584	97.9942	0.280836	99.7192
EIO.MW15.Q	04	B	0	0	0.000347176	0	0.000413515	0	0	6.49471e-05	0.0131677	0.000378256	0.00339429	0.160392	0.160787	0.00339429	0.000413515	6.49471e-05	0.0135986	0.16466	97.648	2.06139	0.251133	0.0394431	7.62856	2.10083	97.8992	0.290576	99.7094
EIO.MW15.Q	05	A	0	0	0.000286563	0.000599069	0.000442862	0	0	0	0.0149927	0	0.00759331	0.181923	0.182249	0.00759331	0.000442862	0	0.0149927	0.190285	95.7768	3.99048	0.232735	0	7.30361	3.99048	96.0095	0.232735	99.7673
EIO.MW15.Q	05	B	0	0	0.00016295	0.000571995	0.000431808	0	0	0	0.0142427	0	0.00568651	0.15766	0.157846	0.00568651	0.000431808	0	0.0142427	0.163964	96.2685	3.46815	0.263355	0	7.99225	3.46815	96.5319	0.263355	99.7366
EIO.MW15.Q	06	A	0	0	0	0.000595304	0.000511785	0	0	0	0.0328799	0.000301197	0.0143026	0.183866	0.183866	0.0143026	0.000511785	0	0.033223	0.19868	92.5436	7.19883	0.257592	0	14.3262	7.19883	92.8012	0.257592	99.7424
EIO.MW15.Q	06	B	0	0	0	0.000840292	0.000643931	0	0	0	0.0439252	0.000300873	0.0185871	0.244389	0.244389	0.0185871	0.000643931	0	0.0442679	0.26362	92.705	7.05072	0.244265	0	14.3779	7.05072	92.9493	0.244265	99.7557
EIO.MW15.Q	07	A	0	0	0.000570363	0	0.000893211	0	0	0.000129288	0.0137427	0.000844237	0.012062	0.287004	0.287654	0.012062	0.000893211	0.000129288	0.0147043	0.300738	95.6492	4.0108	0.297006	0.0429901	4.66149	4.05379	95.9462	0.339996	99.66
EIO.MW15.Q	07	B	0	0	0.000647354	0	0.000846552	0	0	0.000143828	0.0103958	0.000614106	0.0118639	0.267302	0.26804	0.0118639	0.000846552	0.000143828	0.0110953	0.280895	95.4238	4.22361	0.301377	0.0512036	3.79988	4.27481	95.7252	0.352581	99.6474
EIO.MW15.Q	08	A	0	0	0.00141297	0.00136023	0.00125758	0	0	0.000218332	0.0235421	0.000531502	0.0443702	0.513719	0.51533	0.0443702	0.00125758	0.000218332	0.0241475	0.561176	91.8303	7.90665	0.224097	0.0389062	4.1255	7.94555	92.0544	0.263003	99.737
EIO.MW15.Q	08	B	0	0	0.000912051	0.000541386	0.000760961	0	0	0.000175052	0.0177951	0.000272023	0.0260401	0.275496	0.276536	0.0260401	0.000760961	0.000175052	0.018105	0.303512	91.112	8.57962	0.250719	0.0576755	5.62936	8.63729	91.3627	0.308394	99.6916
EIO.MW15.Q	10	A	0	0	0.00539506	0.000356576	0.00260732	0.000559115	0	0.000389552	0.00622521	0.00229547	0.0488693	1.08505	1.0912	0.0495143	0.00260732	0.000389552	0.0088399	1.14371	95.4087	4.32926	0.22797	0.0340603	0.766984	4.36332	95.6367	0.26203	99.738
EIO.MW15.Q	10	B	0	0	0.00452319	0.0002956	0.0023426	0.000429978	0	0.00031195	0.00458422	0.0020106	0.0390416	0.934066	0.939222	0.0395376	0.0023426	0.00031195	0.00687442	0.981414	95.7009	4.02864	0.238696	0.0317858	0.695589	4.06042	95.9396	0.270482	99.7295
EIO.MW15.Q	11	A	0	0	0.00106811	0.000956459	0.000753049	0	0	9.4679e-05	0.00910344	0.00028141	0.0213849	0.308802	0.31002	0.0213849	0.000753049	9.4679e-05	0.00942398	0.332252	93.3085	6.43633	0.22665	0.0284961	2.75816	6.46483	93.5352	0.255146	99.7449
EIO.MW15.Q	11	B	0	0	0.000694543	0.00069019	0.000548044	0	0	0.000169076	0.00601363	0.000276607	0.01352	0.193655	0.194447	0.01352	0.000548044	0.000169076	0.0063287	0.208684	93.1776	6.47872	0.262619	0.0810203	2.94341	6.55974	93.4403	0.34364	99.6564
EIO.MW15.Q	12	A	0.000174161	0	0.000370789	0	0.00037442	0	0	5.58905e-05	0.00356795	0.000170833	0.00456613	0.123783	0.124206	0.00456613	0.00037442	0.000256806	0.00376253	0.129403	95.9836	3.5286	0.289343	0.198454	2.82545	3.72706	96.2729	0.487797	99.5122
EIO.MW15.Q	12	B	0.000231874	0	0.000384441	0	0.000476811	0	0	6.95594e-05	0.0148851	0.000350299	0.0060873	0.172362	0.1728	0.0060873	0.000476811	0.000337054	0.0152841	0.179701	96.1596	3.38745	0.265335	0.187563	7.83861	3.57502	96.425	0.452899	99.5471
EIO.MW15.R	01	A	0	0	6.56395e-05	0.000121632	0.0633695	0	0	0.00144936	0.00546898	0	0.0016376	0.0377946	0.0378694	0.0016376	0.0633695	0.00144936	0.00546898	0.104326	36.2992	1.56969	60.7419	1.38926	4.98109	2.95895	97.041	62.1311	37.8689
EIO.MW15.R	01	B	0	0	7.88531e-05	9.50729e-05	0.0615619	0	0	0.00135769	0.00481159	0	0.0015142	0.0372629	0.0373527	0.0015142	0.0615619	0.00135769	0.00481159	0.101787	36.6971	1.48762	60.4814	1.33386	4.51376	2.82148	97.1785	61.8152	38.1848
EIO.MW15.R	06	A	0	0.000148853	0	0	0.04046	0	0	0.00167877	0.00115902	0	0.000157449	0.00262378	0.00262378	0.000157449	0.0406297	0.00167877	0.00115902	0.0450897	5.81902	0.34919	90.1086	3.72318	2.50605	4.07237	95.9276	93.8318	6.16821
EIO.MW15.R	06	B	0	0.000117126	0	0	0.0447888	0	0	0.00191284	0.000913374	0	0.000209891	0.00285995	0.00285995	0.000209891	0.0449224	0.00191284	0.000913374	0.049905	5.73078	0.420581	90.0157	3.83297	1.79733	4.25355	95.7465	93.8486	6.15136
EIO.MW15.R	09	A	0	0.000143267	7.42516e-05	0	0.0375853	0	0	0.00103024	0.000408692	0	0.00111057	0.0216819	0.0217665	0.00111057	0.0377486	0.00103024	0.000408692	0.0616559	35.3032	1.80124	61.2246	1.67095	0.658494	3.4722	96.5278	62.8956	37.1044
EIO.MW15.R	09	B	0	9.69236e-05	6.14872e-05	0	0.029773	0	0	0.000888478	0.000235794	0	0.000884825	0.0173517	0.0174218	0.000884825	0.0298835	0.000888478	0.000235794	0.0490785	35.4977	1.80288	60.8891	1.81032	0.478144	3.6132	96.3868	62.6994	37.3006
EIO.MW15.R	10	A	0.000167247	0.000145582	0	0	0.0173353	0.000150044	0	0.0352846	0.00011928	0	0.0201771	0.00649192	0.00649192	0.0203502	0.0175012	0.0354775	0.00011928	0.0798209	8.13311	25.4949	21.9256	44.4464	0.149212	69.9413	30.0587	66.372	33.628
EIO.MW15.R	10	B	0.000241558	0.000201912	0	0	0.0236974	0.000226106	0	0.0431903	0.000155017	0	0.0234827	0.0084371	0.0084371	0.0237436	0.0239276	0.0434689	0.000155017	0.0995772	8.47292	23.8444	24.0292	43.6535	0.155434	67.4979	32.5021	67.6827	32.3173
EIO.MW15.R	11	A	0	0	0.000112962	0.000177066	0.000230035	0	0	3.3833e-05	0.00272296	7.55321e-05	0.00225057	0.0570984	0.0572272	0.00225057	0.000230035	3.3833e-05	0.002809	0.0597416	95.7911	3.76718	0.38505	0.0566323	4.49076	3.82381	96.1762	0.441683	99.5583
EIO.MW15.R	11	B	0	0	7.53026e-05	0.000128456	0.000191438	0	0	4.72152e-05	0.00160523	6.25877e-05	0.00169676	0.0423782	0.042464	0.00169676	0.000191438	4.72152e-05	0.00167652	0.0443994	95.6409	3.82159	0.431172	0.106342	3.6386	3.92793	96.0721	0.537514	99.4625
EIO.MW15.R	14	A	0	0.000865475	0.000114374	0	0.133351	0	0	0.00468154	5.54491e-05	0.000137978	0.000480601	0.00752543	0.00765581	0.000480601	0.134337	0.00468154	0.000212615	0.147155	5.20254	0.326595	91.2895	3.18136	0.144275	3.50796	96.492	94.4709	5.52914
EIO.MW15.R	14	B	0	0.000486866	7.6332e-05	0	0.0979811	0	0	0.00319261	5.71924e-05	9.93259e-05	0.000276361	0.00594976	0.00603677	0.000276361	0.0985361	0.00319261	0.000170331	0.108042	5.58744	0.25579	91.2018	2.95498	0.157404	3.21077	96.7892	94.1568	5.84323
EIO.MW15.R	15	A	0.000171012	0.000199899	0.000177605	0	0.0240134	0	0	0.000513699	0.00149401	0	0.00150567	0.0315561	0.0317586	0.00150567	0.0242413	0.000710982	0.00149401	0.0582165	54.5525	2.58633	41.6399	1.22127	2.50208	3.8076	96.1924	42.8612	57.1388
EIO.MW15.R	15	B	0.000127766	0.000213443	0.000113011	0	0.0253241	0	0	0.00048877	0.00143677	0	0.0016766	0.0346823	0.0348111	0.0016766	0.0255674	0.000636163	0.00143677	0.0626913	55.5278	2.67438	40.783	1.01475	2.24046	3.68913	96.3109	41.7978	58.2022
EIO.MW15.R	17	A	0	0.000155417	0.000106182	0.000106472	0.0649845	0	0	0.00529165	0.00584708	9.44877e-05	0.00497548	0.0347369	0.0348579	0.00497548	0.0651617	0.00529165	0.00595471	0.110287	31.6066	4.51141	59.0839	4.79808	5.12271	9.30949	90.6905	63.882	36.118
EIO.MW15.R	17	B	0	0.000205839	8.96381e-05	8.36593e-05	0.0665297	0	0	0.00482227	0.00201007	8.99626e-05	0.00480209	0.0360419	0.0361441	0.00480209	0.0667643	0.00482227	0.00211255	0.112533	32.1187	4.26728	59.3288	4.28521	1.84268	8.55249	91.4475	63.614	36.386
EIO.MW15.S	01	A	0	0	0.000391099	0.000143951	0.000224231	0	0	0	0.00117304	0	0.00136809	0.0701527	0.0705985	0.00136809	0.000224231	0	0.00117304	0.0721908	97.7943	1.89511	0.310608	0	1.59893	1.89511	98.1049	0.310608	99.6894
EIO.MW15.S	01	B	0	0	0.000444397	0.000190678	0.00025808	0	0	0	0.00126877	0	0.00150244	0.0794826	0.0799892	0.00150244	0.00025808	0	0.00126877	0.0817497	97.8464	1.83786	0.315695	0	1.5283	1.83786	98.1621	0.315695	99.6843
EIO.MW15.S	02	A	0	0	0.000782214	0.000386451	0.000347102	0	0	8.80244e-05	0.000687456	0.000141301	0.00241201	0.128517	0.129409	0.00241201	0.000347102	8.80244e-05	0.000848407	0.132256	97.8473	1.82374	0.262447	0.0665559	0.637398	1.8903	98.1097	0.329003	99.671
EIO.MW15.S	02	B	0	0	0.000603456	0.000302676	0.000302559	0	0	6.00032e-05	0.000826757	0.000116759	0.0023059	0.110161	0.110848	0.0023059	0.000302559	6.00032e-05	0.000959753	0.113517	97.6493	2.03133	0.266532	0.0528584	0.838383	2.08419	97.9158	0.31939	99.6806
EIO.MW15.S	03	A	0	0	0.000654346	0.000309367	0.000295842	0	0	5.11007e-05	0.000153559	0.000299371	0.00222162	0.103965	0.104711	0.00222162	0.000295842	5.11007e-05	0.000494561	0.10728	97.6057	2.07087	0.275767	0.0476332	0.458886	2.1185	97.8815	0.3234	99.6766
EIO.MW15.S	03	B	0	0	0.000557838	0.000274529	0.000273933	0	0	6.3501e-05	0.000285376	0.000353394	0.00171655	0.088793	0.0894289	0.00171655	0.000273933	6.3501e-05	0.000687914	0.0914828	97.7548	1.87636	0.299437	0.069413	0.746347	1.94578	98.0542	0.36885	99.6312
EIO.MW15.S	04	A	0	0	0.000158875	0.000150755	0.000132754	0	0	0	0.000137231	0	0.000872855	0.0450137	0.0451948	0.000872855	0.000132754	0	0.000137231	0.0462004	97.8234	1.88928	0.287345	0	0.296153	1.88928	98.1107	0.287345	99.7127
EIO.MW15.S	04	B	0	0	0.000167378	0.000141618	0.000117972	0	0	0	0.000117594	0	0.000933832	0.0482471	0.0484379	0.000933832	0.000117972	0	0.000117594	0.0494897	97.8747	1.88692	0.238376	0	0.237051	1.88692	98.1131	0.238376	99.7616
EIO.MW15.S	05	A	0.000208154	0	0.0011146	0.000733411	0.000306366	0	0	0	0.000160747	0.00141325	0.00190539	0.0817809	0.0830515	0.00190539	0.000306366	0.000240131	0.00177053	0.0855034	97.1324	2.22844	0.358309	0.280844	2.0287	2.50929	97.4907	0.639153	99.3608
EIO.MW15.S	05	B	0.000171998	0	0.000624499	0.000492647	0.000208419	0	0	0	0.000332563	0.00124041	0.0017842	0.0659699	0.0666818	0.0017842	0.000208419	0.000198421	0.00174547	0.0688729	96.8187	2.59058	0.302614	0.288097	2.47169	2.87867	97.1213	0.590712	99.4093
EIO.MW15.S	07	A	0	0	9.17483e-05	0.000110387	0.000102969	0	0	0	0.000278764	0	0.000559303	0.0359512	0.0360558	0.000559303	0.000102969	0	0.000278764	0.036718	98.1963	1.52324	0.280432	0	0.75348	1.52324	98.4768	0.280432	99.7196
EIO.MW15.S	07	B	0	0	0.000124254	0.000139408	0.000120109	0	0	0	0.000288593	0	0.000574334	0.0350642	0.0352059	0.000574334	0.000120109	0	0.000288593	0.0359003	98.0656	1.5998	0.334562	0	0.797464	1.5998	98.4002	0.334562	99.6654
EIO.MW15.S	08	A	0	0	8.51938e-05	0	7.37397e-05	0	0	0	0.000120626	0	0.000310133	0.0205653	0.0206624	0.000310133	7.37397e-05	0	0.000120626	0.0210463	98.1761	1.47358	0.35037	0	0.569881	1.47358	98.5264	0.35037	99.6496
EIO.MW15.S	08	B	0	0	9.70831e-05	0	5.89587e-05	0	0	0	0.000138279	0	0.000369709	0.0255959	0.0257066	0.000369709	5.89587e-05	0	0.000138279	0.0261353	98.3598	1.4146	0.225591	0	0.526305	1.4146	98.5854	0.225591	99.7744
EIO.MW15.S	09	A	0.000115514	0	0.000278181	0.000132245	0.000165286	0	0	0	0.000372333	0.000325905	0.00115185	0.0493881	0.0497052	0.00115185	0.000165286	0.000133259	0.000743559	0.0511556	97.1647	2.25167	0.323104	0.260498	1.4327	2.51216	97.4878	0.583602	99.4164
EIO.MW15.S	09	B	0.000124242	0	0.000316793	0.0001511	0.000195283	0	0	0	0.000422953	0.000418366	0.00134699	0.0622078	0.0625689	0.00134699	0.000195283	0.000143328	0.000899498	0.0642545	97.3767	2.09633	0.303922	0.223062	1.38057	2.3194	97.6806	0.526984	99.473
EIO.MW15.T	02	A	0	0	0	0.000152142	0.000142374	0	0	0	0.000268801	0	0.000907142	0.0514476	0.0514476	0.000907142	0.000142374	0	0.000268801	0.0524971	98.0008	1.72798	0.271203	0	0.509422	1.72798	98.272	0.271203	99.7288
EIO.MW15.T	02	B	0	0	0	0.000137315	0.000177477	0	0	0	0.000816668	0	0.00108658	0.0658576	0.0658576	0.00108658	0.000177477	0	0.000816668	0.0671217	98.1168	1.61883	0.264411	0	1.20207	1.61883	98.3812	0.264411	99.7356
EIO.MW15.T	03	A	0	0	0	0	0.027688	0	0	0.000240088	0.00105632	0	0	0.00163801	0.00163801	0	0.027688	0.000240088	0.00105632	0.0295661	5.54017	0	93.6478	0.812038	3.4495	0.812038	99.188	94.4598	5.54017
EIO.MW15.T	03	B	0	0	0	0	0.0257861	0	0	0.000208633	0.000938824	0	0	0.00146612	0.00146612	0	0.0257861	0.000208633	0.000938824	0.0274608	5.33895	0	93.9013	0.759747	3.30576	0.759747	99.2403	94.6611	5.33895
EIO.MW15.T	06	A	0	0.00017038	0	0	0.0325033	0	0	0.000246465	9.65521e-05	9.97298e-05	0	0.00164452	0.00164452	0	0.0326975	0.000246465	0.00021015	0.0345885	4.75453	0	94.5329	0.712564	0.603904	0.712564	99.2874	95.2455	4.75453
EIO.MW15.T	06	B	0	0.000117712	0	0	0.0325904	0	0	0.00021878	0.000133268	9.4828e-05	0	0.00162071	0.00162071	0	0.0327246	0.00021878	0.000241283	0.0345641	4.68899	0	94.678	0.632968	0.693235	0.632968	99.367	95.311	4.68899
EIO.MW15.T	07	A	0	0	0	0	0.034555	0	0	0.000291611	0.000620757	0	0	0.00216208	0.00216208	0	0.034555	0.000291611	0.000620757	0.0370087	5.84207	0	93.37	0.787952	1.64966	0.787952	99.212	94.1579	5.84207
EIO.MW15.T	07	B	0	0	0	0	0.0407797	0	0	0.000348966	0.000888092	0	0	0.00240499	0.00240499	0	0.0407797	0.000348966	0.000888092	0.0435336	5.52445	0	93.674	0.801602	1.99923	0.801602	99.1984	94.4756	5.52445
EIO.MW15.T	09	A	0	0.000114503	0	0	0.0402824	0	0	0.000355363	0.000549295	0	0	0.00237206	0.00237206	0	0.0404129	0.000355363	0.000549295	0.0431403	5.49846	0	93.6778	0.823737	1.25727	0.823737	99.1763	94.5015	5.49846
EIO.MW15.T	09	B	0	0.000111577	0	0	0.0445727	0	0	0.000397411	0.000523127	0	0	0.00265804	0.00265804	0	0.0446999	0.000397411	0.000523127	0.0477553	5.56595	0	93.6019	0.832182	1.08356	0.832182	99.1678	94.4341	5.56595
EIO.MW15.T	11	A	0	0	0	0	0.0333389	0	0	0.000297146	0.000473889	0	0	0.00201732	0.00201732	0	0.0333389	0.000297146	0.000473889	0.0356533	5.65815	0	93.5084	0.833431	1.31172	0.833431	99.1666	94.3419	5.65815
EIO.MW15.T	11	B	0	0	0	0	0.0373199	0	0	0.000333289	0.0015824	0	0	0.00219399	0.00219399	0	0.0373199	0.000333289	0.0015824	0.0398472	5.50602	0	93.6576	0.836417	3.81948	0.836417	99.1636	94.494	5.50602
EIO.MW15.U	02	A	0	0	0.000789736	0.000613518	0.000443732	0	0	0	0.0344458	0.00231983	0.0102338	0.169296	0.170196	0.0102338	0.000443732	0	0.0370883	0.180874	94.0967	5.658	0.245327	0	17.0159	5.658	94.342	0.245327	99.7547
EIO.MW15.U	02	B	0	0	0.0017171	0.00108079	0.000951143	0	0	0	0.114641	0.00655624	0.0186354	0.381547	0.383505	0.0186354	0.000951143	0	0.122109	0.403091	95.1409	4.62313	0.235962	0	23.2501	4.62313	95.3769	0.235962	99.764
EIO.MW15.U	04	A	0	0	0.0018613	0	0.00147192	0.000314601	0	0.000181076	0.120945	0.0260628	0.0574206	1.74509	1.74721	0.0577835	0.00147192	0.000181076	0.150632	1.80664	96.7101	3.19839	0.0814727	0.0100228	7.69601	3.20841	96.7916	0.0914955	99.9085
EIO.MW15.U	04	B	0	0	0.00328245	0	0.00186172	0.000343652	0	0.000193058	0.180243	0.0354629	0.0662008	2.74799	2.75173	0.0665972	0.00186172	0.000193058	0.220637	2.82039	97.5659	2.36128	0.0660095	0.0068451	7.25536	2.36812	97.6319	0.0728546	99.9271
EIO.MW15.U	05	A	0	0	0.000707819	0.000676619	0.000499155	0	0	7.01875e-05	0.0463744	0.00279064	0.00835989	0.176267	0.177074	0.00835989	0.000499155	7.01875e-05	0.0495531	0.186004	95.1994	4.49448	0.268358	0.0377345	21.0366	4.53221	95.4678	0.306092	99.6939
EIO.MW15.U	05	B	0	0	0.00109654	0.00105653	0.000812589	0	0	0.000111332	0.0790787	0.00558374	0.0191768	0.316381	0.317631	0.0191768	0.000812589	0.000111332	0.0854389	0.337732	94.0483	5.67812	0.240602	0.0329647	20.1902	5.71109	94.2889	0.273567	99.7264
EIO.MW15.U	06	A	0	0	0.00103636	0.000804493	0.000839276	0	0	0.000111581	0.0638334	0.00478826	0.0155246	0.34479	0.345971	0.0155246	0.000839276	0.000111581	0.0692875	0.362447	95.4544	4.28327	0.231558	0.0307856	16.0487	4.31405	95.6859	0.262344	99.7377
EIO.MW15.U	06	B	0	0	0.000975802	0.000715581	0.000697261	0	0	7.20852e-05	0.0645691	0.00409248	0.0126737	0.281215	0.282327	0.0126737	0.000697261	7.20852e-05	0.0692306	0.29577	95.4549	4.28498	0.235744	0.024372	18.9672	4.30935	95.6906	0.260116	99.7399
EIO.MW15.U	08	A	0	0	0.000821367	0.000663569	0.000566461	0	0	8.38775e-05	0.0260927	0.00290643	0.0130948	0.222452	0.223388	0.0130948	0.000566461	8.38775e-05	0.0294033	0.237133	94.2036	5.52213	0.238879	0.0353715	11.0316	5.5575	94.4425	0.27425	99.7257
EIO.MW15.U	08	B	0	0	0.00074967	0.000600478	0.000400994	0	0	8.2692e-05	0.0165462	0.00226669	0.00954017	0.163713	0.164567	0.00954017	0.000400994	8.2692e-05	0.0191281	0.174591	94.2587	5.4643	0.229676	0.0473632	9.87416	5.51166	94.4883	0.277039	99.723
EIO.MW15.U	09	A	0	0	0.000711014	0.000402679	0.000329553	0	0	0	0.00044722	0.0011124	0.00363549	0.106427	0.107238	0.00363549	0.000329553	0	0.00171432	0.111203	96.4344	3.26925	0.296354	0	1.51821	3.26925	96.7308	0.296354	99.7036
EIO.MW15.U	09	B	0	0	0.0010822	0.000812023	0.000600121	0	0	0	0.0382369	0.00334433	0.0149561	0.228215	0.229449	0.0149561	0.000600121	0	0.0420463	0.245005	93.6506	6.10441	0.244942	0	14.6477	6.10441	93.8956	0.244942	99.7551
EIO.MW15.U	10	A	0	0	0.000421526	0.000355761	0.000290566	0	0	0	0.0077109	0.00149625	0.00729181	0.112024	0.112505	0.00729181	0.000290566	0	0.00941522	0.120087	93.6859	6.07211	0.241963	0	7.27032	6.07211	93.9279	0.241963	99.758
EIO.MW15.U	10	B	0	0	0.00112708	0.000929335	0.000756544	0	0	0	0.0885191	0.00488897	0.0167632	0.301641	0.302926	0.0167632	0.000756544	0	0.094088	0.320446	94.5327	5.23122	0.236091	0	22.6973	5.23122	94.7688	0.236091	99.7639
EIO.MW15.U	11	A	0	0	0.000690627	0.000419685	0.000431471	0	0	0	0.00677375	0.00166806	0.00689949	0.16241	0.163198	0.00689949	0.000431471	0	0.00867377	0.170528	95.701	4.04595	0.25302	0	4.84021	4.04595	95.9541	0.25302	99.747
EIO.MW15.U	11	B	0	0	0.000652019	0.000768767	0.000524424	0	0	0	0.0153031	0.00283785	0.0110454	0.205352	0.206095	0.0110454	0.000524424	0	0.0185356	0.217665	94.6846	5.07449	0.240932	0	7.8474	5.07449	94.9255	0.240932	99.7591
EIO.MW15.X	02	A	0	0	0	0	0.00198198	0	0	0.00901729	0.00011445	0	0.000674313	0.000140513	0.000140513	0.000674313	0.00198198	0.00901729	0.00011445	0.0118141	1.18937	5.7077	16.7764	76.3265	0.959463	82.0342	17.9658	93.1029	6.89707
EIO.MW15.X	02	B	0	0	0	0	0.00219607	0	0	0.0102116	9.31136e-05	0	0.000751299	0.000121748	0.000121748	0.000751299	0.00219607	0.0102116	9.31136e-05	0.0132807	0.916728	5.65707	16.5358	76.8904	0.696238	82.5475	17.4525	93.4262	6.5738
EIO.MW15.X	09	A	0	0	0	0	0.00389722	0	0	0.0121001	0.000578865	0	0.000920945	0.000262603	0.000262603	0.000920945	0.00389722	0.0121001	0.000578865	0.0171809	1.52846	5.36028	22.6834	70.4278	3.25942	75.7881	24.2119	93.1113	6.88874
EIO.MW15.X	09	B	0	0	0	0	0.00407179	0	0	0.0120849	0.000517787	0	0.000855019	0.000205116	0.000205116	0.000855019	0.00407179	0.0120849	0.000517787	0.0172168	1.19137	4.96619	23.6501	70.1924	2.91964	75.1585	24.8415	93.8424	6.15756
EIO.MW15.X	10	A	0	0	0	0	0.00246243	0	0	0.0284848	0.000333554	0	0.0020909	0.000190852	0.000190852	0.0020909	0.00246243	0.0284848	0.000333554	0.033229	0.574353	6.29239	7.41048	85.7228	0.993827	92.0152	7.98483	93.1333	6.86674
EIO.MW15.X	10	B	0	0	0	0	0.00213823	0	0	0.0240465	0.000269105	0	0.00177129	0.000157289	0.000157289	0.00177129	0.00213823	0.0240465	0.000269105	0.0281133	0.559485	6.30053	7.60577	85.5342	0.948141	91.8347	8.16525	93.14	6.86002
